# Supplementary material for: Phenylhydrazone-based Endoplasmic Reticulum Proteostasis Regulator Compounds with Enhanced Biological Activity
Source: bioRxiv preprint, doi:10.1101/2025.04.04.646800, version 2 (2025-10-13)
Supplement: Table S1 [file 646800_file02.xlsx]

## Sheet: AA263 DESEQ
	baseMean	log2FoldChange	lfcSE	stat	pvalue	padj
44623	216.705	-0.257964	0.244518	-1.05499	0.291429	0.592675
44625	860.854	0.299499	0.14669	2.04171	0.0411806	0.208248
44626	3705.79	0.160486	0.119351	1.34466	0.178737	0.462637
44627	2921.05	0.177091	0.0796372	2.22372	0.0261674	0.161388
44628	1760.55	0.105703	0.112278	0.941439	0.34648	0.641736
44629	602.08	-0.154143	0.121352	-1.27022	0.204008	0.495547
44630	1.46882	4.13601	6.5712	0.629415	0.529078	NA
44631	0.711392	0	6.28437	0	1	NA
44805	153.747	-0.621268	0.231618	-2.68229	0.00731192	0.0730749
44806	6610.27	0.169364	0.0807294	2.09792	0.035912	0.191904
44807	518.602	-0.233173	0.142676	-1.63428	0.1022	0.346794
44808	74.7131	0.259225	0.368459	0.703538	0.481721	NA
44809	177.005	-0.197295	0.558863	-0.35303	0.724066	0.882054
44810	4049.93	-0.19658	0.0861626	-2.2815	0.0225191	0.146968
44811	2670.02	-0.00186604	0.128658	-0.0145039	0.988428	0.99623
44812	4593.93	0.0364411	0.0689695	0.528364	0.597246	0.820248
44813	3935.42	-0.444983	0.0922465	-4.82385	1.40814e-06	0.000126123
44814	1735.17	0.00415615	0.0835071	0.04977	0.960306	0.983412
44815	2600.46	0.0766407	0.126554	0.605599	0.544781	0.783481
44816	0.689219	-2.98696	4.35253	-0.686258	0.49255	NA
44819	2593.1	0.07286	0.0873495	0.834121	0.404213	0.688039
2024-03-01	2892.14	-0.00210861	0.0970867	-0.0217188	0.982672	0.994514
2024-03-02	553.106	-0.086255	0.143079	-0.602848	0.54661	0.784414
A1BG	127.5	-0.198746	0.27804	-0.714813	0.474725	0.73909
A1BG-AS1	406.196	0.178007	0.18444	0.96512	0.334485	0.630041
A1CF	0.81528	0.715346	3.81097	0.187707	0.851106	NA
A2M	1.25754	1.50174	3.31767	0.452649	0.650802	NA
A2M-AS1	6.57286	-0.0802678	1.20985	-0.0663453	0.947103	NA
A2ML1	2.9918	1.41907	2.60042	0.545709	0.585266	NA
A3GALT2	0.743035	1.00088	5.12704	0.195216	0.845224	NA
A4GALT	106.179	-0.917392	0.339655	-2.70095	0.00691419	0.0707185
AAAS	7812	-0.250886	0.13285	-1.88848	0.058961	0.25616
AACS	910.536	-0.0187309	0.13002	-0.144063	0.885451	0.95387
AADAT	832.51	-0.110997	0.168867	-0.657303	0.510986	0.763838
AAED1	427.266	-0.00510037	0.243492	-0.0209467	0.983288	0.994642
AAGAB	2767.85	0.182371	0.117353	1.55404	0.120176	0.378371
AAK1	970.758	-0.323037	0.165961	-1.94646	0.0515995	0.237917
AAMDC	359.153	0.0271953	0.252449	0.107726	0.914213	0.966049
AAMP	6160.86	0.0372224	0.0753498	0.493996	0.621309	0.833992
AANAT	20.9592	-0.596609	0.639788	-0.932511	0.351073	NA
AAR2	2087.23	-0.0866736	0.11794	-0.734894	0.462404	0.730132
AARD	27.8188	-0.634902	0.595728	-1.06576	0.286533	NA
AARS	11915.5	0.412624	0.0628542	6.56478	5.21107e-11	1.42144e-08
AARS2	2541.73	0.202249	0.0902532	2.24091	0.0250319	0.157108
AARSD1	730.605	0.308367	0.242419	1.27204	0.203358	0.494771
AASDH	733.106	0.22	0.122218	1.80007	0.0718504	0.288894
AASDHPPT	1600.48	-0.0142005	0.124361	-0.114188	0.909089	0.964058
AASS	1704.52	0.29582	0.0900398	3.28544	0.00101825	0.0203962
AATBC	11.109	-1.2103	1.07981	-1.12084	0.262355	NA
AATF	6218.88	0.0252518	0.0859809	0.293691	0.768994	0.904229
AATK	108.628	-0.77566	0.380457	-2.03876	0.0414738	0.208883
AATK-AS1	1.52106	1.7135	3.5801	0.478618	0.63221	NA
ABALON	269.203	-0.0676917	0.196301	-0.344835	0.730218	0.88535
ABAT	127.204	0.161395	0.348131	0.463604	0.642932	0.841538
ABCA1	31.1131	-0.234316	0.719468	-0.325679	0.744667	NA
ABCA10	2.74106	1.72543	2.53534	0.680549	0.496157	NA
ABCA12	2.37843	1.8442	2.45999	0.749678	0.453449	NA
ABCA13	0.782513	-5.30227	6.56657	-0.807465	0.419399	NA
ABCA2	1954.14	-0.193564	0.121509	-1.593	0.11116	0.361862
ABCA3	1474.02	0.18071	0.131149	1.3779	0.168235	0.448902
ABCA4	1.33244	-2.13443	4.32263	-0.493779	0.621462	NA
ABCA5	277.55	0.17841	0.292778	0.609371	0.542278	0.782169
ABCA7	549.239	0.0455347	0.176188	0.258444	0.796064	0.917818
ABCA8	1.5363	1.46342	3.5187	0.415897	0.677486	NA
ABCA9	0.442613	3.28609	6.58208	0.499247	0.617605	NA
ABCB1	408.392	0.0699227	0.150688	0.464021	0.642632	0.841538
ABCB10	2294.9	0.153229	0.0982898	1.55895	0.119009	0.376276
ABCB4	15.1103	0.673609	0.874284	0.770469	0.441022	NA
ABCB5	0.331853	-2.1335	6.63702	-0.321455	0.747865	NA
ABCB6	539.592	0.377947	0.152817	2.4732	0.013391	0.107721
ABCB7	1465.92	0.126474	0.109193	1.15826	0.246756	0.544647
ABCB8	1875.68	0.0371152	0.133009	0.279043	0.780212	0.910032
ABCB9	463.712	0.0735211	0.180573	0.407155	0.683894	0.861562
ABCC1	2602.25	0.122961	0.124583	0.986975	0.323655	0.619832
ABCC10	1329.22	0.330841	0.119541	2.76761	0.00564698	0.0617822
ABCC11	21.161	0.685929	0.750735	0.913676	0.360887	NA
ABCC2	25.5475	0.645187	0.644942	1.00038	0.317127	NA
ABCC3	1.55478	3.82485	3.58208	1.06778	0.285622	NA
ABCC4	974.346	0.217147	0.161572	1.34396	0.178962	0.462798
ABCC5	1882.78	0.0985426	0.138424	0.71189	0.476533	0.739698
ABCC6	56.6895	-0.332027	0.442015	-0.751167	0.452552	NA
ABCC8	77.1685	0.79127	0.36365	2.17591	0.0295617	NA
ABCC9	3.74861	-1.06279	2.28655	-0.464802	0.642073	NA
ABCD1	1675.27	-0.150692	0.116971	-1.28828	0.197648	0.486034
ABCD2	18.597	0.19411	0.804359	0.241322	0.809306	NA
ABCD3	2294.14	0.120871	0.0951265	1.27063	0.20386	0.495547
ABCD4	1502.89	0.34932	0.117421	2.97493	0.00293055	0.0405213
ABCE1	2908.78	0.274226	0.0845456	3.24353	0.0011806	0.0225271
ABCF1	9721.71	0.138922	0.0758422	1.83173	0.0669923	0.276778
ABCF2	7394.31	0.225026	0.0776333	2.89857	0.00374864	0.047409
ABCF3	1417.1	0.162368	0.100334	1.61827	0.105605	0.353088
ABCG1	100.737	-0.609902	0.30404	-2.006	0.0448567	0.218649
ABCG2	93.832	0.262711	0.368875	0.712194	0.476345	0.739685
ABCG4	37.5396	0.15142	0.649231	0.233229	0.815583	NA
ABCG5	4.83082	-0.854307	1.5353	-0.556442	0.577909	NA
ABCG8	1.53085	0.916411	3.1527	0.290675	0.7713	NA
ABHD1	27.9783	-0.389586	0.662946	-0.587659	0.556761	NA
ABHD10	2415.35	0.0970489	0.0893506	1.08616	0.277409	0.577825
ABHD11	1158.52	-0.0649948	0.147851	-0.439596	0.66023	0.85181
ABHD11-AS1	1.25562	-1.18657	3.17605	-0.373598	0.708703	NA
ABHD12	1048.26	0.203386	0.0970376	2.09595	0.0360865	0.192323
ABHD12B	9.81121	0.832093	0.956032	0.870362	0.384103	NA
ABHD13	169.779	-0.0504623	0.229931	-0.219467	0.826287	0.930383
ABHD14A	915.214	-0.301166	0.163046	-1.84712	0.0647295	0.270785
ABHD14A-ACY1	787.191	-0.111169	0.130106	-0.85445	0.392856	0.678718
ABHD14B	508.873	-0.0687535	0.13502	-0.509208	0.610606	0.82868
ABHD15	335.753	-0.223727	0.182596	-1.22526	0.220477	0.516175
ABHD16A	668.306	0.136726	0.151129	0.904701	0.365624	0.657805
ABHD16B	79.7218	-0.0988096	0.320364	-0.308429	0.757756	NA
ABHD17A	3064.48	-0.182971	0.0856385	-2.13655	0.0326345	0.181754
ABHD17B	330.642	0.061108	0.21218	0.288001	0.773346	0.90661
ABHD17C	182.549	-0.135081	0.253839	-0.532152	0.594621	0.819512
ABHD18	261.278	0.29585	0.224305	1.31896	0.187181	0.473498
ABHD2	934.112	0.344016	0.116781	2.94583	0.00322089	0.0430847
ABHD3	935.672	0.307974	0.128158	2.40308	0.0162574	0.121538
ABHD4	935.197	-0.362123	0.160823	-2.2517	0.0243415	0.15464
ABHD5	795.069	0.0625904	0.118452	0.528404	0.597219	0.820248
ABHD6	400.765	0.123204	0.186968	0.658958	0.509923	0.763838
ABHD8	182.719	-0.222307	0.247132	-0.899549	0.36836	0.66025
ABI1	3058.7	-0.181893	0.127031	-1.43188	0.152179	0.425646
ABI2	3873.52	-0.00818636	0.0821654	-0.0996327	0.920636	0.968763
ABI3	3.26944	4.05414	2.5602	1.58352	0.113303	NA
ABI3BP	20.5232	-0.116062	0.682435	-0.17007	0.864955	NA
ABL1	2730.17	0.0141187	0.0912198	0.154776	0.876998	0.951952
ABL2	925.402	0.292644	0.184956	1.58223	0.113596	0.366567
ABLIM1	1192.19	-0.13395	0.16313	-0.821122	0.411577	0.694031
ABLIM2	31.5554	0.710362	0.510186	1.39236	0.163814	NA
ABLIM3	29.3737	-0.195796	0.55299	-0.354069	0.723287	NA
ABR	2527.87	-0.224401	0.0918588	-2.44289	0.01457	0.113426
ABRACL	380.837	-0.253673	0.16573	-1.53064	0.125859	0.387622
ABT1	2424.52	-0.139355	0.0926401	-1.50426	0.132515	0.397313
ABTB1	154.033	-0.0697569	0.385181	-0.181102	0.856288	0.943292
ABTB2	732.619	-0.515535	0.139242	-3.70244	0.000213538	0.00667416
ACAA1	1424.6	0.131686	0.104288	1.26271	0.206692	0.499386
ACAA2	941.51	0.140546	0.103635	1.35616	0.175048	0.457717
ACACA	5020	0.220538	0.103407	2.13271	0.0329481	0.182704
ACACB	781.072	0.0569503	0.191511	0.297374	0.766181	0.902205
ACAD10	452.74	0.00166204	0.160544	0.0103526	0.99174	0.99652
ACAD11	171.242	-0.335505	0.715168	-0.469128	0.638978	0.840532
ACAD8	475.488	0.169204	0.194997	0.867729	0.385543	0.674138
ACAD9	2252.6	0.312956	0.0826375	3.78709	0.000152419	0.00531783
ACADL	68.4909	0.86423	0.583985	1.47988	0.138904	NA
ACADM	2123.17	0.132506	0.127098	1.04255	0.297159	0.596804
ACADS	255.32	-0.138469	0.207828	-0.666269	0.505239	0.760552
ACADSB	491.476	0.631727	0.141327	4.46997	7.82313e-06	0.00053047
ACADVL	1886.12	0.18221	0.134135	1.35841	0.174335	0.457473
ACAN	27.5867	-1.37677	0.712641	-1.93193	0.0533679	NA
ACAP1	350.735	-0.205463	0.203225	-1.01102	0.312009	0.60844
ACAP2	504.961	0.257529	0.203945	1.26274	0.206683	0.499386
ACAP3	580.174	-0.0466975	0.188519	-0.247706	0.804362	0.921178
ACAT1	5021.71	0.133287	0.127584	1.0447	0.296161	0.59629
ACAT2	4028.27	0.0349918	0.105114	0.332893	0.739215	0.889899
ACBD3	2084.18	0.21245	0.127138	1.67102	0.0947172	0.333078
ACBD4	87.1747	-0.348552	0.346841	-1.00493	0.314929	0.611615
ACBD5	372.106	-0.168386	0.133963	-1.25696	0.208767	0.501826
ACBD6	2568.97	-0.031554	0.0919056	-0.34333	0.73135	0.885917
ACBD7	27.7233	-0.0606937	0.611232	-0.0992973	0.920902	NA
ACCS	69.3079	0.10123	0.421142	0.240371	0.810043	NA
ACCSL	0.589036	-3.69865	6.58461	-0.561711	0.574313	NA
ACD	2388.75	-0.263784	0.161538	-1.63295	0.102479	0.34755
ACE	73.9251	-0.200857	0.37703	-0.532735	0.594217	NA
ACE2	21.8967	0.660063	0.864704	0.76334	0.44526	NA
ACER2	173.538	-0.339209	0.292566	-1.15943	0.246281	0.544647
ACER3	1121.62	0.0209763	0.104351	0.201018	0.840685	0.937188
ACHE	98.748	-0.563559	0.397721	-1.41697	0.156492	0.431773
ACIN1	17704.8	-0.0860392	0.0738728	-1.16469	0.244143	0.542888
ACKR2	1.58321	2.81576	3.13579	0.897942	0.369217	NA
ACKR3	1.84463	-1.56916	3.06581	-0.511826	0.608772	NA
ACKR4	5.77473	-0.320921	1.53142	-0.209557	0.834013	NA
ACLY	25612.2	0.0492561	0.0663302	0.742589	0.45773	0.727435
ACMSD	1.20573	-2.55126	3.32133	-0.768145	0.442401	NA
ACO1	3008.95	0.0729242	0.104174	0.70002	0.483915	0.745564
ACO2	10191.2	0.151535	0.0743503	2.03813	0.0415373	0.209028
ACOT1	267.979	-0.179212	0.177847	-1.00768	0.31361	0.610336
ACOT11	44.7985	0.31062	0.539018	0.57627	0.564432	NA
ACOT13	681.296	-0.023408	0.221467	-0.105695	0.915824	0.966855
ACOT2	961.943	-0.115951	0.108672	-1.06699	0.285978	0.587222
ACOT4	1.37319	0.110981	2.34839	0.0472586	0.962307	NA
ACOT6	1.41163	1.02124	2.59698	0.393241	0.694141	NA
ACOT7	4506.64	-0.160025	0.094326	-1.69651	0.0897887	0.326164
ACOT8	1321.93	-0.0482201	0.130521	-0.369445	0.711796	0.877327
ACOT9	756.543	0.0630583	0.158325	0.398284	0.690421	0.864869
ACOX1	785.432	-0.0356761	0.11484	-0.310659	0.75606	0.89785
ACOX2	2.92913	0.0602513	2.39015	0.0252082	0.979889	NA
ACOX3	499.734	0.208939	0.180652	1.15658	0.247445	0.545123
ACOXL	11.0723	-0.584821	1.02201	-0.572224	0.56717	NA
ACP1	4471.32	0.0730263	0.0628125	1.16261	0.244988	0.543302
ACP2	2733.64	0.0644625	0.0850955	0.757531	0.448732	0.72215
ACP5	1.19277	0.982953	3.71905	0.264302	0.791547	NA
ACP6	1239.9	0.0163513	0.0955535	0.171122	0.864128	0.947148
ACPP	3.24768	-1.45565	1.97492	-0.737067	0.461081	NA
ACPT	2.98381	0.0942913	1.73904	0.0542204	0.95676	NA
ACR	7.58673	-0.756194	0.895804	-0.844151	0.398585	NA
ACRBP	5.11996	-0.458164	1.31129	-0.349399	0.72679	NA
ACRC	35.5915	0.0741441	0.665315	0.111442	0.911266	NA
ACRV1	3.92639	0.477871	1.48954	0.320818	0.748349	NA
ACSBG1	6.28769	0.749088	1.56796	0.477746	0.632831	NA
ACSBG2	2.92482	4.50897	2.11898	2.1279	0.0333456	NA
ACSF2	399.991	-0.20441	0.166461	-1.22798	0.219454	0.514734
ACSF3	1355.18	0.122188	0.13869	0.881013	0.378311	0.668376
ACSL1	624.605	0.159028	0.171881	0.925221	0.354851	0.64883
ACSL3	6695.34	0.132077	0.071873	1.83764	0.0661148	0.274476
ACSL4	1318.14	0.203837	0.14509	1.4049	0.160051	0.436204
ACSL5	1.8167	1.5359	2.96301	0.518358	0.604209	NA
ACSL6	82.2368	0.0257845	0.470148	0.0548433	0.956263	0.981282
ACSM2A	0.373194	0	6.66256	0	1	NA
ACSM3	137.826	-0.309615	0.334726	-0.924979	0.354977	0.648917
ACSM6	0.555643	0	6.66256	0	1	NA
ACSS1	673.761	-0.117071	0.119574	-0.979071	0.327545	0.622812
ACSS2	664.065	-0.0548916	0.135457	-0.405232	0.685307	0.862256
ACSS3	219.894	0.243393	0.307024	0.792749	0.427924	0.708843
ACTA1	24.41	0.198604	0.799594	0.248381	0.80384	NA
ACTA2	75.4087	-0.383208	0.345904	-1.10785	0.267928	NA
ACTA2-AS1	42.8778	-0.633796	0.440976	-1.43726	0.150644	NA
ACTB	65714.1	-0.324185	0.105066	-3.08554	0.00203181	0.0320964
ACTBL2	0.518054	-3.69864	6.58461	-0.561709	0.574314	NA
ACTC1	1.28822	0.324768	3.12382	0.103965	0.917197	NA
ACTG1	158868	-0.24879	0.110317	-2.25524	0.0241184	0.153646
ACTG2	75.949	-0.101322	0.345866	-0.292953	0.769558	NA
ACTL10	0.483867	0.80846	6.62728	0.12199	0.902907	NA
ACTL6A	2201.1	0.192944	0.103304	1.86773	0.0617996	0.262742
ACTL6B	10.142	-0.580614	1.05235	-0.55173	0.581133	NA
ACTL7A	0.574088	-2.11498	6.63803	-0.318615	0.750019	NA
ACTL7B	0.351295	-0.0600928	6.59614	-0.00911029	0.992731	NA
ACTL8	45.8292	-0.0777777	0.383292	-0.20292	0.839197	NA
ACTN1	7398.76	-0.216095	0.084163	-2.56758	0.0102412	0.0915317
ACTN2	167.734	0.250045	0.248561	1.00597	0.314429	0.611167
ACTN3	2.256	2.1727	2.13891	1.0158	0.309726	NA
ACTN4	18743.7	-0.0202341	0.08631	-0.234435	0.814648	0.926166
ACTR10	1462.96	0.0268767	0.102702	0.261695	0.793557	0.917176
ACTR1A	3273.89	0.0467053	0.117976	0.395887	0.692188	0.865643
ACTR1B	567.672	-0.0943375	0.18141	-0.520024	0.603047	0.825178
ACTR2	3898.13	0.188162	0.106585	1.76538	0.0775005	0.300828
ACTR3	7122.64	-0.116598	0.0853161	-1.36666	0.171732	0.453865
ACTR3B	1317.93	-0.0752054	0.0901097	-0.834599	0.403944	0.687985
ACTR3C	137.822	0.365403	0.247	1.47936	0.139043	0.406721
ACTR5	703.75	0.071749	0.144125	0.497824	0.618608	0.832459
ACTR6	951.097	-0.289443	0.140901	-2.05422	0.039954	0.20497
ACTR8	1674.36	0.0342244	0.105516	0.324354	0.74567	0.893208
ACTRT3	97.0939	0.441023	0.358594	1.22987	0.218747	0.51425
ACVR1	210.2	0.0355006	0.214187	0.165746	0.868357	0.949182
ACVR1B	555.312	0.413626	0.15828	2.61326	0.00896836	0.0838958
ACVR1C	25.1234	0.523984	0.684427	0.76558	0.443926	NA
ACVR2A	287.486	0.373333	0.215161	1.73513	0.0827179	0.312006
ACVR2B	396.36	0.174793	0.237791	0.735069	0.462297	0.730132
ACVR2B-AS1	70.3332	-0.261944	0.351218	-0.745818	0.455777	NA
ACVRL1	4.98809	-0.735189	1.73236	-0.424385	0.671285	NA
ACY1	1.21839	-0.28513	6.66256	-0.0427958	0.965864	NA
ACYP1	180.576	-0.296089	0.239772	-1.23488	0.216876	0.511485
ACYP2	133.842	0.430259	0.296582	1.45072	0.146857	0.418319
ADA	762.87	-0.0556411	0.162264	-0.342904	0.731671	0.885947
ADAL	305.443	0.195532	0.19407	1.00754	0.313677	0.610369
ADAM10	1184.96	0.451875	0.143508	3.14878	0.00163953	0.0281544
ADAM11	511.528	-0.313116	0.154063	-2.03239	0.0421139	0.210868
ADAM12	6.46691	0.44055	1.5897	0.277127	0.781682	NA
ADAM15	3677.45	-0.178374	0.0965802	-1.8469	0.064762	0.270827
ADAM17	950.396	0.434693	0.11648	3.7319	0.000190043	0.00616458
ADAM19	206.429	-0.472259	0.24309	-1.94273	0.0520485	0.239343
ADAM20	0.403167	0	6.66256	0	1	NA
ADAM21	6.50821	0.714165	1.34609	0.530546	0.595733	NA
ADAM22	226.938	0.196823	0.224109	0.878249	0.379809	0.669496
ADAM23	459.036	0.227771	0.189971	1.19898	0.230536	0.527732
ADAM28	0.467819	0	6.66256	0	1	NA
ADAM29	0.298558	1.28188	6.65295	0.192679	0.84721	NA
ADAM32	2.6858	1.29126	2.16778	0.595661	0.551402	NA
ADAM8	67.5968	0.231938	0.42291	0.548434	0.583394	NA
ADAM9	3463.41	0.261829	0.0888854	2.9457	0.0032223	0.0430847
ADAMTS1	2578.89	0.248191	0.125111	1.98376	0.0472828	0.225462
ADAMTS10	57.74	-0.797485	0.600793	-1.32739	0.184381	NA
ADAMTS12	3.55123	-1.5925	2.21245	-0.719793	0.471652	NA
ADAMTS13	181.635	0.0339085	0.376054	0.0901693	0.928153	0.971916
ADAMTS14	1.56684	-1.56976	2.9582	-0.530648	0.595663	NA
ADAMTS15	292.053	-0.333021	0.206321	-1.61409	0.106508	0.354298
ADAMTS16	0.388376	0.676575	6.66256	0.101549	0.919115	NA
ADAMTS17	269.688	0.318902	0.207427	1.53742	0.12419	0.385349
ADAMTS18	3.99059	1.28349	2.12521	0.603934	0.545887	NA
ADAMTS19	125.215	-0.0136626	0.302452	-0.0451727	0.96397	0.984811
ADAMTS19-AS1	23.9237	-1.10409	0.711492	-1.55179	0.120712	NA
ADAMTS2	258.762	-0.218369	0.288699	-0.756389	0.449416	0.722557
ADAMTS20	69.7042	-0.53648	0.489571	-1.09582	0.273159	NA
ADAMTS3	224.801	-0.465975	0.298833	-1.55932	0.118921	0.376231
ADAMTS4	4.69868	-0.283235	2.0573	-0.137673	0.890499	NA
ADAMTS5	10.4883	-0.0125035	1.19264	-0.0104839	0.991635	NA
ADAMTS6	35.2926	0.704394	0.511804	1.3763	0.16873	NA
ADAMTS7	98.1792	0.0411902	0.308793	0.133391	0.893884	0.957408
ADAMTS8	31.7325	-0.373377	0.899816	-0.414949	0.67818	NA
ADAMTS9	342.244	-0.105282	0.18761	-0.561176	0.574678	0.80464
ADAMTS9-AS1	3.5684	-0.675257	1.47233	-0.458632	0.646498	NA
ADAMTS9-AS2	1.173	-1.24687	6.66256	-0.187146	0.851546	NA
ADAMTSL1	1.50429	0.450003	3.37769	0.133228	0.894013	NA
ADAMTSL3	26.838	0.77992	0.689797	1.13065	0.258201	NA
ADAMTSL4	58.8498	-0.0448153	0.456026	-0.0982737	0.921715	NA
ADAMTSL4-AS1	0.685272	1.76245	4.84569	0.363715	0.716071	NA
ADAMTSL5	63.8254	-0.3959	0.39749	-0.996	0.31925	NA
ADAP1	258.795	-0.36432	0.240516	-1.51474	0.129838	0.393911
ADAP2	145.112	0.0244054	0.258682	0.0943452	0.924835	0.970569
ADAR	8483.42	0.0883236	0.116068	0.760967	0.446677	0.720567
ADARB1	1178.04	0.152227	0.110395	1.37893	0.167917	0.448842
ADAT1	478.258	0.306042	0.188795	1.62103	0.105012	0.352047
ADAT2	204.978	0.271811	0.246002	1.10491	0.269197	0.569377
ADAT3	671.186	-0.302054	0.20589	-1.46707	0.142358	0.411905
ADCK1	992.283	0.0540454	0.149505	0.361495	0.717729	0.879668
ADCK2	1349.9	-0.0483267	0.118583	-0.407534	0.683616	0.861562
ADCK3	3440.61	0.123531	0.0637834	1.93672	0.0527794	0.241134
ADCK4	819.328	-0.114027	0.109998	-1.03662	0.299912	0.598111
ADCK5	153.916	-0.3161	0.388957	-0.812687	0.416398	0.69838
ADCY1	756.507	0.0565929	0.169791	0.33331	0.7389	0.889854
ADCY10	4.52732	1.41153	1.53501	0.919557	0.357804	NA
ADCY2	0.68818	0.676527	6.66256	0.101542	0.919121	NA
ADCY3	1908.36	0.0746352	0.11482	0.650022	0.515678	0.766628
ADCY5	54.53	-0.732716	0.47142	-1.55428	0.120119	NA
ADCY6	1571.96	0.191857	0.15551	1.23373	0.217305	0.511792
ADCY7	106.455	0.290928	0.359938	0.808273	0.418934	0.70106
ADCY8	0.285061	1.22605	6.56009	0.186896	0.851742	NA
ADCY9	1546.79	0.024937	0.107059	0.232927	0.815818	0.92655
ADCYAP1R1	85.8649	0.00195215	0.415699	0.00469606	0.996253	0.998484
ADD1	4429.46	0.112963	0.0847631	1.3327	0.182632	0.467166
ADD2	1484.45	-0.203207	0.104529	-1.94402	0.0518933	0.239088
ADD3	1408.04	0.221505	0.184253	1.20218	0.229296	0.526196
ADD3-AS1	131.536	-0.233199	0.315806	-0.738426	0.460255	0.729431
ADGRA1	1.11437	-2.11812	3.80959	-0.555998	0.578212	NA
ADGRA2	619.992	-0.356487	0.130396	-2.73389	0.00625914	0.0662117
ADGRA3	1859.29	0.135731	0.0898968	1.50985	0.131081	0.395206
ADGRB1	169.015	-0.37299	0.276368	-1.34961	0.17714	0.460679
ADGRB2	689.98	-0.179269	0.161284	-1.11151	0.266349	0.566192
ADGRB3	145.765	0.171509	0.279081	0.614549	0.538853	0.77949
ADGRD1	2.27835	1.53827	3.4072	0.451475	0.651647	NA
ADGRD2	1.19456	-1.30818	3.43764	-0.380546	0.70354	NA
ADGRE1	3.45172	-0.279326	2.56912	-0.108725	0.913421	NA
ADGRE2	21.7814	-0.70303	0.741192	-0.948513	0.342868	NA
ADGRE5	514.45	-0.123135	0.194433	-0.633302	0.526536	0.772381
ADGRF3	61.6578	0.276791	0.410174	0.674814	0.499794	NA
ADGRF4	0.773508	0	5.66109	0	1	NA
ADGRG1	1.93906	-3.41293	2.65295	-1.28647	0.19828	NA
ADGRG2	44.1668	0.0632759	0.561886	0.112613	0.910337	NA
ADGRG3	1.62428	-1.40452	3.66326	-0.383408	0.701417	NA
ADGRG6	89.0848	-0.881843	0.496696	-1.77542	0.0758289	0.29703
ADGRL1	3121.58	-0.257379	0.129046	-1.99447	0.0461006	0.222464
ADGRL2	5581.87	0.187556	0.0714799	2.6239	0.0086928	0.0821504
ADGRL3	462.117	0.0809353	0.199646	0.405393	0.685188	0.862197
ADGRL3-AS1	14.8336	-0.127217	0.911635	-0.139548	0.889017	NA
ADGRV1	463.703	0.508036	0.196035	2.59156	0.00955408	0.0873329
ADH5	2698.08	-0.0517616	0.127051	-0.407409	0.683708	0.861562
ADH6	3.35748	-1.21552	1.88327	-0.645429	0.518649	NA
ADHFE1	8.12552	-0.0354299	0.900415	-0.0393484	0.968613	NA
ADI1	4849.79	0.0561799	0.139548	0.402584	0.687254	0.863348
ADIPOR1	5541.81	0.134273	0.0821019	1.63544	0.101957	0.346458
ADIPOR2	1279.52	0.217305	0.155658	1.39604	0.162702	0.439611
ADK	1362.98	0.19428	0.105699	1.83805	0.0660554	0.274324
ADM	58.8812	-0.649259	0.430426	-1.50841	0.13145	NA
ADM2	36.0687	1.31727	0.622475	2.11618	0.0343297	NA
ADM5	106.565	-0.029155	0.285782	-0.102018	0.918742	0.967983
ADNP	3875.4	0.0663121	0.0816273	0.812376	0.416576	0.698581
ADNP-AS1	34.3196	-0.252854	0.552501	-0.457653	0.647202	NA
ADNP2	2142.06	0.0761838	0.117093	0.650629	0.515286	0.766293
ADO	652.025	-0.217268	0.155199	-1.39993	0.161534	0.438131
ADORA1	66.9747	-0.271237	0.490582	-0.552887	0.580341	NA
ADORA2A-AS1	6.70258	1.50863	1.13015	1.33489	0.181913	NA
ADORA2B	603.669	-0.0158784	0.150595	-0.105438	0.916028	0.966855
ADPGK	2555.09	0.173914	0.0774576	2.24528	0.0247499	0.156171
ADPGK-AS1	74.2467	0.412106	0.534886	0.770457	0.441029	NA
ADPRH	6.13769	-0.28766	1.5618	-0.184185	0.853868	NA
ADPRHL1	79.2421	0.232282	0.316912	0.732954	0.463586	NA
ADPRHL2	854.936	-0.127698	0.125909	-1.01421	0.310483	0.606809
ADPRM	133.225	-0.0183963	0.267504	-0.0687702	0.945173	0.977817
ADRA1A	2.72906	0.367132	2.63273	0.139449	0.889095	NA
ADRA1B	10.3114	0.547795	1.05154	0.520945	0.602405	NA
ADRA1D	0.496788	0.917175	6.37594	0.143849	0.885619	NA
ADRA2A	2.87177	1.95462	1.89857	1.02952	0.303235	NA
ADRA2B	0.953448	-0.943096	5.14156	-0.183426	0.854464	NA
ADRA2C	495.218	-0.321072	0.21321	-1.5059	0.132093	0.396802
ADRB1	12.6647	1.03743	0.837934	1.23808	0.215685	NA
ADRB2	50.3741	0.0719454	0.453582	0.158616	0.873971	NA
ADRM1	13675.2	-0.185348	0.0947765	-1.95563	0.0505088	0.235055
ADSL	7822.46	-0.0281353	0.0670553	-0.419583	0.67479	0.858693
ADSS	1925.58	0.138433	0.104256	1.32781	0.18424	0.46909
ADSSL1	51.0037	0.181982	0.400579	0.454298	0.649614	NA
AEBP1	3.25441	-1.00726	1.54115	-0.653574	0.513387	NA
AEBP2	749.29	0.119718	0.132539	0.903266	0.366385	0.658582
AEN	941.845	0.241172	0.114845	2.09998	0.0357306	0.191104
AES	1359.56	-0.560259	0.168355	-3.32784	0.000875227	0.0182948
AFAP1	355.364	0.150749	0.205045	0.735199	0.462218	0.730132
AFAP1-AS1	57.4297	0.00672584	0.585409	0.0114891	0.990833	NA
AFAP1L1	327.192	-0.266878	0.205325	-1.29979	0.193674	0.480363
AFAP1L2	33.1906	-1.41071	0.639023	-2.2076	0.0272722	NA
AFF1	965.038	-0.0569836	0.202632	-0.281217	0.778544	0.909046
AFF2	689.203	-0.0801255	0.150939	-0.530848	0.595524	0.819512
AFF3	275.554	-0.719923	0.21536	-3.34288	0.000829149	0.0176444
AFF4	1911.96	0.200168	0.240866	0.831034	0.405954	0.689337
AFG3L2	2919.38	0.242377	0.099846	2.42751	0.0152029	0.116621
AFMID	644.564	-0.237448	0.162084	-1.46497	0.14293	0.412765
AFP	4.42898	0	6.66256	0	NA	NA
AFTPH	1179.14	0.157356	0.0982999	1.60078	0.109426	0.359394
AGA	530.7	0.155536	0.22861	0.680356	0.496279	0.75368
AGAP1	1507.7	-0.122981	0.130368	-0.943334	0.34551	0.64083
AGAP1-IT1	2.30849	0.459932	2.65183	0.17344	0.862306	NA
AGAP11	41.8698	0.0752324	0.608482	0.123639	0.901601	NA
AGAP2	74.0513	-0.143899	0.423157	-0.34006	0.733811	NA
AGAP2-AS1	445.811	-0.565877	0.228357	-2.47804	0.0132106	0.107059
AGAP3	6108.19	-0.395184	0.12621	-3.13117	0.00174112	0.0291865
AGAP4	239.555	0.261296	0.277363	0.94207	0.346157	0.641336
AGAP5	184.444	0.304624	0.323683	0.941119	0.346644	0.641818
AGAP6	741.931	0.0458275	0.236409	0.193849	0.846294	0.939149
AGAP9	537.589	0.0941667	0.227844	0.413295	0.679391	0.860132
AGBL2	0.351121	0	6.66256	0	1	NA
AGBL3	58.7682	0.102464	0.361871	0.283151	0.777061	NA
AGBL4	10.724	-0.0254893	1.06533	-0.0239263	0.980911	NA
AGBL5	6023.24	-0.0585707	0.0989169	-0.59212	0.55377	0.78941
AGBL5-AS1	0.713762	-0.177601	4.69764	-0.0378064	0.969842	NA
AGER	279.36	-0.155923	0.215349	-0.724048	0.469036	0.735145
AGFG1	3679.02	0.15673	0.0758028	2.0676	0.0386774	0.200754
AGFG2	584.235	0.0439266	0.185296	0.237062	0.812609	0.924887
AGGF1	1686.12	0.126907	0.127824	0.992826	0.320795	0.616424
AGK	2100.84	0.165343	0.116868	1.41478	0.157132	0.432446
AGL	2495.44	0.157445	0.160248	0.982513	0.325847	0.621797
AGMAT	65.5489	-0.217563	0.576641	-0.377294	0.705955	NA
AGMO	3.82843	-1.10245	2.40065	-0.459231	0.646068	NA
AGO1	1288.5	-0.0114204	0.113608	-0.100524	0.919928	0.968507
AGO2	1947.68	0.132807	0.119242	1.11376	0.265382	0.565137
AGO3	513.317	0.367213	0.174767	2.10116	0.0356273	0.190949
AGO4	447.758	0.479213	0.165156	2.90158	0.00371283	0.0472549
AGPAT1	2363.58	0.177302	0.113599	1.56076	0.11858	0.375716
AGPAT2	2113.52	-0.255881	0.113766	-2.24919	0.0245005	0.155111
AGPAT3	715.983	0.107857	0.166821	0.646546	0.517926	0.767426
AGPAT4	849.075	0.376706	0.159293	2.36487	0.0180364	0.128242
AGPAT4-IT1	20.853	-0.911451	0.960345	-0.949087	0.342576	NA
AGPAT5	579.059	0.269045	0.154652	1.73968	0.081915	0.310532
AGPS	2959.27	0.110248	0.0950974	1.15931	0.246329	0.544647
AGR2	0.522746	0	6.66256	0	1	NA
AGRN	2233.15	-0.125606	0.105202	-1.19395	0.232497	0.529952
AGT	0.983711	-1.2181	3.52311	-0.345747	0.729533	NA
AGTPBP1	2480.67	0.245822	0.0913103	2.69216	0.00709917	0.0718939
AGTR1	44.8645	-0.468457	0.505684	-0.926383	0.354247	NA
AGTRAP	954.945	-0.0459008	0.150823	-0.304335	0.760872	0.900324
AHCTF1	1719.8	0.271138	0.122727	2.20927	0.0271561	0.16461
AHCY	13602.1	-0.0783519	0.0862632	-0.908289	0.363725	0.65616
AHCYL1	7040.96	0.00486297	0.0694014	0.0700702	0.944138	0.977817
AHCYL2	280.315	0.380718	0.226118	1.68372	0.0922367	0.328007
AHDC1	1203.86	-0.5467	0.141886	-3.8531	0.000116634	0.00442986
AHI1	1107.79	0.17454	0.14361	1.21537	0.224224	0.520933
AHNAK	1176.74	-0.139265	0.191892	-0.725748	0.467993	0.734306
AHNAK2	201.162	0.223753	0.2389	0.9366	0.348965	0.64386
AHR	458.352	-0.121388	0.220842	-0.54966	0.582552	0.810173
AHRR	463.881	-0.0063243	0.209456	-0.0301939	0.975912	0.991191
AHSA1	8736.44	0.196549	0.0819042	2.39975	0.0164065	0.122153
AHSA2	90.2957	0.524819	0.390429	1.34421	0.17888	0.462798
AHSG	0.54043	0	6.66256	0	1	NA
AIDA	1117.46	0.128189	0.0940041	1.36366	0.172675	0.454883
AIF1	0.492029	-3.69865	6.58461	-0.561712	0.574312	NA
AIF1L	2148.96	-0.348963	0.0998807	-3.4938	0.000476192	0.0120575
AIFM1	6771.29	0.196729	0.0780841	2.51945	0.0117539	0.0999085
AIFM2	82.2687	-0.469965	0.459461	-1.02286	0.306374	0.602735
AIFM3	3.59496	0.107424	1.68174	0.0638765	0.949069	NA
AIG1	1675.71	-0.0905135	0.0924165	-0.979409	0.327378	0.62262
AIM1	27.8917	-0.701844	0.572608	-1.2257	0.220312	NA
AIM1L	43.2113	-0.517169	0.60271	-0.858073	0.390852	NA
AIMP1	1261.5	0.197604	0.133211	1.48339	0.137971	0.405466
AIMP2	5573.54	0.0279056	0.0828362	0.336877	0.73621	0.888307
AIP	2050.68	-0.148496	0.106822	-1.39013	0.164491	0.443246
AJUBA	435.778	-0.145382	0.272991	-0.532551	0.594344	0.819512
AK1	2521.65	-0.364605	0.120028	-3.03767	0.00238411	0.035634
AK2	15119.9	0.038129	0.0525081	0.726155	0.467744	0.734306
AK3	696.618	0.166448	0.131118	1.26945	0.20428	0.495958
AK4	63.7509	-0.313456	0.31803	-0.985617	0.324321	NA
AK5	45.6969	-0.474554	0.5702	-0.832259	0.405263	NA
AK6	1354.71	0.295226	0.13237	2.23031	0.0257266	0.159571
AK7	30.3378	0.548103	0.669641	0.818503	0.41307	NA
AK8	61.4648	-0.41471	0.446505	-0.92879	0.352998	NA
AK9	106.757	0.322185	0.38066	0.846384	0.397338	0.68224
AKAP1	5952.58	-0.195183	0.0686329	-2.84387	0.00445692	0.0533852
AKAP10	792.263	0.204278	0.136996	1.49112	0.13593	0.402523
AKAP11	1269.51	0.207963	0.151405	1.37356	0.169579	0.450737
AKAP12	3050.07	-0.0919103	0.127504	-0.720841	0.471007	0.736743
AKAP13	1409.26	0.11538	0.135117	0.853925	0.393147	0.679025
AKAP14	0.858316	-2.17869	6.00988	-0.362517	0.716966	NA
AKAP17A	2667.89	0.294951	0.123951	2.37959	0.017332	0.125223
AKAP2	706.877	0.0882805	0.149699	0.589722	0.555377	0.790072
AKAP3	70.2475	0.0577683	0.430201	0.134282	0.89318	NA
AKAP5	83.6912	-0.367108	0.280655	-1.30804	0.190859	0.477725
AKAP6	93.6055	0.0594626	0.479108	0.124111	0.901227	0.96036
AKAP7	377.884	0.0495982	0.178521	0.277829	0.781144	0.910351
AKAP8	2277.36	-0.116094	0.0658637	-1.76264	0.077962	0.301644
AKAP8L	2931.89	-0.0117757	0.106135	-0.11095	0.911656	0.965216
AKAP9	1744.57	0.340566	0.165961	2.05209	0.0401609	0.205373
AKIP1	556.615	0.0458188	0.124864	0.366949	0.713657	0.878134
AKIRIN1	1745.97	-0.0708215	0.139239	-0.508634	0.611008	0.828719
AKIRIN2	1736.67	-0.176838	0.104693	-1.68911	0.0911978	0.327401
AKNA	506.346	-0.116603	0.213716	-0.5456	0.585341	0.81256
AKNAD1	0.623015	-3.71782	6.58426	-0.564653	0.57231	NA
AKR1A1	1782.57	0.082428	0.112035	0.735733	0.461893	0.730068
AKR1B1	7422.36	0.0710701	0.0707921	1.00393	0.315414	0.611963
AKR1C1	6.81435	-1.79985	1.32257	-1.36088	0.173553	NA
AKR1C2	11.3939	1.46158	1.11094	1.31562	0.188301	NA
AKR1C3	3.27484	-1.68599	2.04465	-0.824588	0.409606	NA
AKR7A2	2842.46	-0.0975905	0.0977599	-0.998268	0.31815	0.61479
AKR7A3	20.8022	0.0346391	0.847343	0.0408797	0.967392	NA
AKT1	3871.26	0.0214625	0.105838	0.202788	0.839301	0.936354
AKT1S1	3794.78	-0.403061	0.13324	-3.02508	0.00248566	0.0363372
AKT2	4746.84	-0.349905	0.104484	-3.34889	0.000811346	0.0174948
AKT3	668.596	0.149667	0.170669	0.876942	0.380518	0.66986
AKTIP	116.152	0.425042	0.256996	1.65389	0.0981505	0.340956
ALAD	424.407	-0.236617	0.148992	-1.58812	0.112259	0.363457
ALAS1	3219.21	0.0965408	0.0822153	1.17424	0.240298	0.538371
ALB	1.30042	4.95093	3.68335	1.34414	0.178903	NA
ALCAM	1125	0.237504	0.110285	2.15354	0.0312762	0.177892
ALDH16A1	1426.35	-0.0836204	0.132357	-0.631778	0.527532	0.772601
ALDH18A1	7605.34	0.113269	0.0789817	1.43412	0.151539	0.424856
ALDH1A1	4.49864	-1.28498	1.58976	-0.808289	0.418924	NA
ALDH1A2	1157.61	0.160059	0.15365	1.04171	0.297545	0.597161
ALDH1A3	29.9884	-0.202127	0.704725	-0.286817	0.774253	NA
ALDH1B1	3548.19	-0.524904	0.0956852	-5.48574	4.11738e-08	5.95383e-06
ALDH1L1	13.3658	0.63205	0.937454	0.674219	0.500172	NA
ALDH1L1-AS2	1.12712	-1.15696	3.56394	-0.324629	0.745462	NA
ALDH1L2	2538.65	0.754582	0.117485	6.42279	1.33802e-10	3.41679e-08
ALDH2	2736.41	-0.0304108	0.0941075	-0.32315	0.746582	0.893492
ALDH3A1	44.5102	-0.338684	0.597696	-0.566649	0.570953	NA
ALDH3A2	2248.31	-0.0194761	0.103151	-0.188812	0.85024	0.941369
ALDH3B1	6.6839	-0.374738	1.26151	-0.297054	0.766425	NA
ALDH3B2	0.577398	-4.71746	6.571	-0.717922	0.472805	NA
ALDH4A1	990.886	0.106556	0.133826	0.796226	0.4259	0.7073
ALDH5A1	587.239	-0.121	0.169929	-0.71206	0.476427	0.739685
ALDH6A1	583.727	0.191674	0.17133	1.11874	0.26325	0.562831
ALDH7A1	1442.9	0.407822	0.112885	3.61273	0.00030299	0.00863774
ALDH8A1	17.7853	0.647632	0.8652	0.748534	0.454138	NA
ALDH9A1	3087.8	0.156062	0.0990614	1.5754	0.115163	0.369553
ALDOA	75838	-0.0932871	0.0892268	-1.04551	0.29579	0.595949
ALDOB	1.13301	1.23231	3.10599	0.396752	0.69155	NA
ALDOC	555.347	-0.165305	0.193493	-0.854319	0.392928	0.678746
ALG1	2256.47	0.0790132	0.0759218	1.04072	0.298006	0.597227
ALG10	186.438	0.571275	0.231808	2.46444	0.0137228	0.109291
ALG10B	122.995	0.122043	0.298469	0.408896	0.682616	0.861562
ALG11	392.595	0.353596	0.168101	2.10348	0.0354241	0.190058
ALG12	1738.24	0.256111	0.116744	2.19378	0.0282511	0.168023
ALG13	4546.04	-0.0571373	0.0943576	-0.60554	0.54482	0.783481
ALG14	1157.38	0.162677	0.133997	1.21403	0.224736	0.521618
ALG1L	54.1279	0.0224071	0.391161	0.0572836	0.954319	NA
ALG1L2	11.4435	-0.151732	0.748135	-0.202813	0.839281	NA
ALG2	1812.38	0.408972	0.0887153	4.60993	4.028e-06	0.000302151
ALG3	5545.68	-0.231444	0.137373	-1.68479	0.0920289	0.32788
ALG5	1885.86	0.0265961	0.118764	0.223941	0.822803	0.929439
ALG6	1776.83	0.0435916	0.10895	0.400108	0.689077	0.8641
ALG8	4559.28	0.306856	0.072757	4.21755	2.46973e-05	0.00127217
ALG9	765.183	0.272911	0.135841	2.00904	0.0445327	0.218025
ALK	0.895111	0.676486	6.56791	0.102999	0.917964	NA
ALKBH1	1109.77	0.103974	0.11017	0.943756	0.345294	0.640727
ALKBH2	418.168	-0.0912124	0.183245	-0.497761	0.618652	0.832459
ALKBH3	917.742	0.146954	0.12856	1.14307	0.253008	0.551609
ALKBH3-AS1	2.97129	-0.11689	1.80124	-0.0648942	0.948258	NA
ALKBH4	732.284	-0.0677578	0.149507	-0.453209	0.650399	0.845821
ALKBH5	1515.59	-0.00901793	0.100286	-0.0899223	0.928349	0.971916
ALKBH6	615.635	-0.151973	0.129365	-1.17476	0.240093	0.538247
ALKBH7	1032.95	-0.287883	0.139641	-2.06159	0.0392465	0.202771
ALKBH8	1058.49	-0.0821443	0.130059	-0.631592	0.527654	0.772601
ALLC	0.331581	0	6.66256	0	1	NA
ALMS1	2882.29	0.199159	0.0928693	2.14451	0.0319918	0.179759
ALMS1-IT1	18.4448	0.293195	0.777132	0.377278	0.705967	NA
ALOX12	52.5858	0.132577	0.392541	0.337741	0.735558	NA
ALOX12-AS1	35.7368	-0.322626	0.510413	-0.632088	0.527329	NA
ALOX12B	5.77298	-1.75059	1.48804	-1.17644	0.239419	NA
ALOX15	0.836875	-2.71856	5.59378	-0.485996	0.62697	NA
ALOX15B	7.94614	0.586998	1.23969	0.473502	0.635855	NA
ALOX5	13.8312	0.611565	1.01124	0.604765	0.545335	NA
ALOXE3	66.2444	-0.536775	0.558589	-0.960948	0.336578	NA
ALPK1	167.697	0.297597	0.24216	1.22893	0.219099	0.514469
ALPK2	5.06855	2.90544	1.71594	1.69321	0.0904162	NA
ALPK3	9.00429	0.664726	1.03294	0.643526	0.519883	NA
ALPL	173.944	-0.197967	0.266576	-0.74263	0.457706	0.727435
ALPPL2	0.452831	0	6.66256	0	1	NA
ALS2	1553.03	0.353155	0.100018	3.53092	0.000414115	0.0108757
ALS2CL	27.7222	-0.36694	0.702454	-0.52237	0.601413	NA
ALS2CR11	1.41551	0.339719	4.08368	0.0831895	0.933701	NA
ALS2CR12	7.03391	0.650792	1.39487	0.466562	0.640813	NA
ALX1	419.263	-0.0960346	0.207836	-0.462069	0.644032	0.842195
ALX3	31.0976	0.451935	0.515899	0.876015	0.381022	NA
ALX4	394.109	-0.658001	0.191266	-3.44024	0.000581208	0.0139793
ALYREF	9589.35	-0.142763	0.127643	-1.11846	0.26337	0.562831
AMACR	56.1107	-0.160034	0.388618	-0.411801	0.680485	NA
AMBN	39.1885	-0.136842	0.635376	-0.215372	0.829477	NA
AMBRA1	3346.61	-0.0886683	0.0958319	-0.925248	0.354837	0.64883
AMD1	8771.04	0.0954439	0.123453	0.773122	0.43945	0.716538
AMDHD1	10.6252	0.590044	1.26016	0.468229	0.639621	NA
AMDHD2	742.436	-0.194512	0.133849	-1.45322	0.146163	0.417213
AMELX	0.76005	-3.1331	6.59749	-0.474893	0.634864	NA
AMER1	685.513	0.040219	0.153375	0.262226	0.793147	0.91692
AMER2	2.83599	-1.47435	1.86841	-0.789096	0.430056	NA
AMFR	2240.53	0.258749	0.0913907	2.83124	0.00463683	0.0542489
AMH	347.551	-0.0463622	0.248847	-0.186308	0.852203	0.941743
AMHR2	151.651	-0.449422	0.317715	-1.41455	0.157202	0.432539
AMIGO1	202.899	-0.346986	0.215907	-1.60711	0.108031	0.35699
AMIGO2	25.6848	-1.46621	0.706491	-2.07534	0.0379552	NA
AMIGO3	451.57	0.184703	0.179951	1.02641	0.3047	0.601086
AMMECR1	574.773	-0.149633	0.184536	-0.810858	0.417447	0.699214
AMMECR1L	838.35	0.152908	0.17067	0.895931	0.37029	0.661834
AMN	2.49197	-0.984213	1.54225	-0.638169	0.523364	NA
AMN1	322.708	-0.0750579	0.2096	-0.358101	0.720268	0.879954
AMOT	23773.4	-0.118418	0.115139	-1.02848	0.303723	0.600586
AMOTL1	2591.12	0.07629	0.117693	0.648209	0.51685	0.767426
AMOTL2	679.737	-0.0482808	0.162077	-0.297888	0.765788	0.902016
AMPD1	5.88848	-0.0729798	2.18345	-0.0334241	0.973336	NA
AMPD2	3920.56	0.0216561	0.109863	0.19712	0.843734	0.937986
AMPD3	20.9266	0.134496	0.889234	0.151249	0.879779	NA
AMPH	480.07	-0.311489	0.148313	-2.1002	0.0357109	0.191084
AMT	13.6128	0.424687	1.07446	0.395256	0.692654	NA
AMY1A	1.36985	2.78265	2.62532	1.05993	0.289177	NA
AMY1B	1.51029	-0.430052	2.79087	-0.154092	0.877537	NA
AMY2A	3.34519	1.71024	1.9097	0.895552	0.370492	NA
AMY2B	11.6469	0.73109	1.01777	0.718326	0.472556	NA
AMZ1	0.997694	1.4464	4.01839	0.359945	0.718888	NA
AMZ2	5648.69	-0.0821052	0.0808007	-1.01614	0.309561	0.605755
ANAPC1	5736.32	0.0897098	0.0765581	1.17179	0.241283	0.539627
ANAPC10	646.234	-0.124493	0.149414	-0.833214	0.404724	0.688226
ANAPC11	1102.12	0.143841	0.13113	1.09694	0.272669	0.573686
ANAPC13	410.126	0.123884	0.170432	0.726881	0.467299	0.733988
ANAPC15	1497.73	-0.120674	0.122936	-0.981603	0.326295	0.622
ANAPC16	1692.5	0.0910786	0.112859	0.807013	0.419659	0.701399
ANAPC2	2344.97	-0.351196	0.0890961	-3.94176	8.08848e-05	0.00341192
ANAPC4	877.752	0.103333	0.134167	0.770187	0.441189	0.717112
ANAPC5	7420.43	0.0283967	0.0754324	0.376452	0.706581	0.874723
ANAPC7	4369.46	0.00923	0.0738152	0.125042	0.90049	0.960148
ANG	31.2755	0.0649222	0.535372	0.121266	0.903481	NA
ANGEL1	1107.45	0.0877544	0.146885	0.597435	0.550217	0.78728
ANGEL2	1176.29	0.141567	0.124849	1.1339	0.256837	0.556319
ANGPT1	14.2639	-0.170089	0.702658	-0.242066	0.808729	NA
ANGPT2	3.05542	-0.911772	2.60652	-0.349804	0.726486	NA
ANGPT4	0.511079	-5.08658	6.568	-0.77445	0.438665	NA
ANGPTL1	1.31773	3.25705	3.51542	0.926504	0.354184	NA
ANGPTL2	1.90432	-0.230039	2.53705	-0.090672	0.927753	NA
ANGPTL3	0.787785	1.35136	5.09526	0.265218	0.790841	NA
ANGPTL4	3.92244	0.095871	1.64921	0.0581315	0.953644	NA
ANGPTL6	15.6839	0.591718	0.840968	0.703615	0.481673	NA
ANGPTL7	0.359186	-0.750768	6.57815	-0.11413	0.909134	NA
ANGPTL8	2.88385	-1.73267	1.72921	-1.002	0.316342	NA
ANK1	87.2851	-0.229021	0.328576	-0.697008	0.485798	0.746931
ANK2	659.135	0.464538	0.140842	3.29829	0.000972743	0.0197211
ANK3	904.954	-0.0408361	0.126792	-0.322071	0.747399	0.893566
ANKAR	71.8541	-0.598461	0.48055	-1.24537	0.212997	NA
ANKDD1A	13.8995	-0.532671	0.84607	-0.629583	0.528967	NA
ANKDD1B	0.573894	-2.14732	6.14646	-0.349359	0.72682	NA
ANKEF1	211.954	0.0317658	0.267784	0.118625	0.905573	0.96249
ANKFN1	6.87968	1.55765	1.47277	1.05763	0.290223	NA
ANKFY1	4923.18	0.212707	0.0711683	2.98879	0.00280085	0.0394551
ANKH	839.229	0.0494996	0.155447	0.318435	0.750155	0.894849
ANKHD1	1646.87	-0.0268144	0.307514	-0.0871974	0.930515	0.972487
ANKHD1-EIF4EBP3	7173.95	0.0696019	0.0843939	0.824726	0.409527	0.692412
ANKIB1	1146.76	-0.00322664	0.143261	-0.0225228	0.982031	0.994074
ANKK1	1.23106	-0.459091	6.48603	-0.0707816	0.943572	NA
ANKLE1	44.0192	0.110053	0.555347	0.19817	0.842912	NA
ANKLE2	5050.17	0.0370832	0.0760819	0.487411	0.625967	0.836297
ANKMY1	244.281	0.0788883	0.224084	0.352048	0.724802	0.882438
ANKMY2	390.688	0.379259	0.177881	2.13209	0.0329991	0.182704
ANKRA2	209.357	0.000299141	0.276864	0.00108046	0.999138	0.999411
ANKRD1	9.2737	1.80254	0.978968	1.84126	0.0655829	NA
ANKRD10	436.73	0.144296	0.189073	0.763173	0.44536	0.719506
ANKRD11	6153.14	0.320205	0.0873209	3.66699	0.000245424	0.0073824
ANKRD12	486.929	-0.0309527	0.228465	-0.135481	0.892232	0.95672
ANKRD13A	1057.92	0.272747	0.127527	2.13874	0.0324567	0.181307
ANKRD13B	1619.59	-0.411375	0.131625	-3.12536	0.0017759	0.0294893
ANKRD13C	1824	0.0579295	0.104994	0.551743	0.581125	0.809219
ANKRD13D	698.524	-0.0357086	0.174704	-0.204395	0.838045	0.935822
ANKRD16	320.749	-0.108086	0.172023	-0.628322	0.529793	0.774645
ANKRD17	10061.3	0.0948567	0.102409	0.926254	0.354314	0.648738
ANKRD18A	270.427	0.0342026	0.242124	0.14126	0.887664	0.954266
ANKRD18B	428.407	0.219097	0.152055	1.4409	0.149612	0.422106
ANKRD2	1.4562	1.83346	6.6243	0.276778	0.781951	NA
ANKRD20A1	13.0029	1.15046	0.803056	1.4326	0.151972	NA
ANKRD20A2	10.7581	0.314373	0.892584	0.352206	0.724684	NA
ANKRD20A3	11.255	-0.291566	0.849358	-0.343278	0.731389	NA
ANKRD20A4	14.7527	-0.151828	0.857197	-0.177121	0.859413	NA
ANKRD23	40.1776	0.0922119	0.637349	0.14468	0.884963	NA
ANKRD24	67.746	0.170332	0.409009	0.416451	0.67708	NA
ANKRD26	802.744	0.0409687	0.189618	0.21606	0.828941	0.931463
ANKRD27	1661.15	0.382117	0.107153	3.56608	0.000362367	0.00977331
ANKRD28	1666.55	0.078931	0.116525	0.677373	0.498169	0.754353
ANKRD29	46.4567	-0.273139	0.585301	-0.466665	0.64074	NA
ANKRD30A	0.36893	0	6.66256	0	1	NA
ANKRD31	41.49	0.336055	0.50354	0.667386	0.504526	NA
ANKRD33B	51.7405	-0.228408	0.590695	-0.386676	0.698996	NA
ANKRD34A	106.441	-0.590768	0.29227	-2.02131	0.0432477	0.214736
ANKRD34B	62.4045	-0.27714	0.472735	-0.586248	0.557709	NA
ANKRD35	1.21892	2.20202	6.60934	0.333167	0.739008	NA
ANKRD36	151.255	0.167214	0.284997	0.586722	0.55739	0.791692
ANKRD36B	156.306	0.101883	0.304353	0.334753	0.737812	0.889167
ANKRD36C	80.0562	0.972761	0.362519	2.68334	0.00728913	NA
ANKRD37	16.3992	-1.89059	0.998421	-1.89358	0.0582802	NA
ANKRD39	543.336	-0.395565	0.138419	-2.85774	0.0042667	0.0517262
ANKRD40	1540.37	-0.0404541	0.132063	-0.306324	0.759358	0.899508
ANKRD42	282.31	0.225291	0.234129	0.962253	0.335922	0.630351
ANKRD44	168.619	0.121063	0.23408	0.517187	0.605025	0.826461
ANKRD45	1.39853	-0.538863	3.57362	-0.150789	0.880142	NA
ANKRD46	486.509	0.50953	0.20967	2.43015	0.0150924	0.116056
ANKRD49	189.747	0.130334	0.252676	0.515815	0.605984	0.826548
ANKRD50	482.29	0.06748	0.170181	0.396518	0.691723	0.865643
ANKRD52	2504	0.142778	0.125446	1.13816	0.255053	0.554217
ANKRD53	5.3289	1.22062	1.53869	0.793286	0.427611	NA
ANKRD54	2276.87	0.0464466	0.0868064	0.53506	0.592609	0.818374
ANKRD6	305.484	-0.399735	0.269269	-1.48452	0.137671	0.405335
ANKRD61	13.0992	0.791561	1.1175	0.708333	0.478738	NA
ANKRD63	7.36032	-0.551045	1.11886	-0.492504	0.622363	NA
ANKRD65	0.541609	0	6.29324	0	1	NA
ANKRD7	19.639	-1.10283	0.74343	-1.48344	0.137958	NA
ANKRD9	478.51	-0.443566	0.160486	-2.76389	0.00571172	0.0620942
ANKS1A	2727.81	0.0935874	0.101121	0.925502	0.354705	0.64883
ANKS1B	28.0524	-0.693261	0.762474	-0.909226	0.363231	NA
ANKS3	489.114	0.202658	0.179685	1.12785	0.259383	0.558909
ANKS6	1767.54	0.0991148	0.0975221	1.01633	0.309472	0.605755
ANKZF1	1135.24	0.0959926	0.15808	0.607239	0.543692	0.783173
ANLN	6351.84	0.22222	0.0809313	2.74579	0.00603658	0.0644009
ANO1	6.2272	-0.48117	1.72088	-0.279607	0.779779	NA
ANO10	1033.4	0.102541	0.11676	0.878221	0.379824	0.669496
ANO2	6.21376	-0.566329	1.47778	-0.383228	0.701551	NA
ANO4	71.2869	-0.12889	0.441686	-0.291815	0.770428	NA
ANO5	409.075	0.129833	0.199349	0.651283	0.514864	0.766088
ANO6	1179.81	0.218285	0.187429	1.16463	0.244168	0.542888
ANO7	90.4826	-0.732598	0.388978	-1.88339	0.0596473	0.257884
ANO7P1	11.5503	-0.268944	1.0367	-0.259423	0.795309	NA
ANO8	627.567	-0.19702	0.185038	-1.06475	0.286988	0.587887
ANO9	1.86928	-2.17267	3.06932	-0.707866	0.479028	NA
ANOS1	2.85106	-5.23905	2.87856	-1.82003	0.0687551	NA
ANP32A	11055.9	0.0461429	0.0960361	0.480474	0.63089	0.838323
ANP32A-IT1	4.81157	1.18498	1.86147	0.636582	0.524397	NA
ANP32B	10352.6	0.0614398	0.13645	0.450274	0.652513	0.847469
ANP32C	602.756	-0.040717	0.170284	-0.239112	0.811019	0.924216
ANP32D	0.842038	0.556416	2.6518	0.209826	0.833803	NA
ANP32E	2872.74	0.0141524	0.17631	0.0802701	0.936022	0.97434
ANPEP	4.79868	2.89623	1.97661	1.46525	0.142852	NA
ANTXR1	821.275	-0.120817	0.185309	-0.651974	0.514418	0.765898
ANTXR2	174.348	0.162525	0.312322	0.520376	0.602802	0.82514
ANXA1	70.0547	-0.0734519	0.480083	-0.152998	0.8784	NA
ANXA11	4097.59	-0.205245	0.096542	-2.12597	0.033506	0.184467
ANXA2	1111.41	-0.0991906	0.118502	-0.837038	0.402571	0.686803
ANXA2R	14.7658	0.162692	0.918187	0.177188	0.859361	NA
ANXA3	58.0497	-0.762128	0.379492	-2.00829	0.0446129	NA
ANXA4	269.923	0.0255563	0.182282	0.140202	0.888501	0.954681
ANXA5	5812.13	0.322442	0.13273	2.4293	0.0151281	0.11624
ANXA6	5472.19	0.126334	0.0919967	1.37324	0.169676	0.450737
ANXA7	2882.14	0.180155	0.0798275	2.2568	0.0240205	0.153185
ANXA8	3.76863	1.54916	1.22312	1.26657	0.20531	NA
ANXA9	17.8752	0.01081	0.686334	0.0157503	0.987434	NA
AOAH	0.445682	0	6.66256	0	1	NA
AOC2	99.2126	-0.391548	0.327329	-1.19619	0.231622	0.528829
AOC3	39.7381	0.275402	0.471389	0.584234	0.559063	NA
AOX1	1.61119	-2.76461	6.60902	-0.418308	0.675722	NA
AP1AR	1276.15	-0.0526069	0.126483	-0.415921	0.677468	0.859425
AP1B1	13705.3	-0.146716	0.0796274	-1.84253	0.0653981	0.272916
AP1G1	3468.82	0.187787	0.105928	1.77278	0.0762655	0.297962
AP1G2	913.051	0.200856	0.204697	0.981234	0.326477	0.622
AP1M1	3174.71	-0.0505226	0.0818225	-0.617467	0.536927	0.778815
AP1S1	695.228	-0.00310587	0.172424	-0.018013	0.985628	0.99484
AP1S2	3917.47	-0.0524938	0.0970771	-0.540743	0.588684	0.815112
AP1S3	718.241	0.108337	0.149929	0.722588	0.469933	0.735726
AP2A1	7231.95	-0.0553758	0.0710685	-0.779188	0.435869	0.714532
AP2A2	7397.03	-0.0410686	0.0575114	-0.714095	0.475168	0.73951
AP2B1	6245.23	0.232493	0.11157	2.08383	0.0371757	0.196013
AP2M1	17723.5	-0.0591588	0.0861427	-0.686753	0.492238	0.75087
AP2S1	4247.1	-0.152493	0.113008	-1.3494	0.177208	0.460755
AP3B1	3225.94	0.246869	0.0934282	2.64234	0.00823358	0.0789287
AP3B2	161.796	0.272656	0.227063	1.2008	0.22983	0.526981
AP3D1	16998	0.0945574	0.0691184	1.36805	0.171297	0.453218
AP3M1	6788.05	0.122695	0.0764987	1.60388	0.10874	0.358171
AP3M2	1586.09	0.279952	0.103997	2.69191	0.00710433	0.0718939
AP3S1	1223.96	-0.11529	0.122954	-0.937664	0.348417	0.643436
AP3S2	3277.73	0.0340286	0.0713084	0.477203	0.633218	0.839373
AP4B1	593.497	0.241845	0.129052	1.87401	0.0609296	0.261077
AP4B1-AS1	85.3305	-0.0816037	0.357045	-0.228553	0.819216	0.927482
AP4E1	702.185	0.14759	0.126837	1.16362	0.24458	0.543302
AP4M1	304.258	0.0565878	0.185508	0.305042	0.760334	0.90022
AP4S1	46.5156	0.540721	0.612156	0.883306	0.377071	NA
AP5B1	1894.37	-0.232086	0.124408	-1.86553	0.0621074	0.26349
AP5M1	1716.69	0.322066	0.103927	3.09897	0.00194194	0.0312428
AP5S1	362.467	-0.256405	0.237519	-1.07951	0.28036	0.580802
AP5Z1	944.711	0.099843	0.128224	0.778664	0.436178	0.714532
APAF1	557.644	0.10036	0.202878	0.494683	0.620824	0.833992
APBA1	20.1385	-0.114155	0.676075	-0.16885	0.865914	NA
APBA2	1514.53	-0.0614751	0.0950472	-0.646785	0.517771	0.767426
APBA3	971.601	-0.109303	0.147901	-0.739027	0.459891	0.729143
APBB1	2930.95	-0.255466	0.0685999	-3.724	0.00019609	0.00627577
APBB2	589.696	0.0534515	0.148816	0.35918	0.719461	0.879668
APBB3	179.737	0.321587	0.313301	1.02645	0.304681	0.601086
APC	2986.62	0.228091	0.12228	1.86532	0.0621364	0.26352
APC2	104.036	-0.116696	0.280459	-0.41609	0.677344	0.859425
APCDD1	149.393	-0.0374276	0.284801	-0.131417	0.895446	0.957634
APCDD1L-AS1	2.68624	3.439	2.87431	1.19646	0.231516	NA
APEH	3963.79	0.0660095	0.0770285	0.856949	0.391473	0.677988
APEX1	13753.1	-0.0343574	0.104806	-0.327821	0.743047	0.891707
APEX2	2585.42	-0.0683616	0.0831961	-0.821693	0.411252	0.693803
APH1A	7992.23	-0.235847	0.107497	-2.194	0.0282357	0.168023
APH1B	54.497	-0.00448411	0.560071	-0.00800633	0.993612	NA
API5	8923.32	0.0213138	0.0676482	0.315068	0.75271	0.895966
APIP	833.648	-0.242913	0.150006	-1.61936	0.10537	0.352663
APITD1	358.481	0.45161	0.179351	2.51802	0.0118017	0.100173
APITD1-CORT	240.003	-0.161462	0.214541	-0.752596	0.451693	0.724614
APLF	134.211	0.100132	0.264532	0.378525	0.705041	0.873119
APLN	14.6767	-1.86994	0.594016	-3.14797	0.0016441	NA
APLP1	473.944	-0.309362	0.16816	-1.83969	0.065814	0.273795
APLP2	23173.2	-0.0176375	0.0961233	-0.183488	0.854415	0.942613
APMAP	3973.43	0.143601	0.0698268	2.05654	0.0397308	0.204393
APOA1	4.78739	-0.0387754	1.69883	-0.0228248	0.98179	NA
APOA2	2.62137	-2.61279	5.11166	-0.511143	0.609251	NA
APOA4	2.57852	0	6.66256	0	NA	NA
APOB	2.06529	0.939318	3.1789	0.295485	0.767623	NA
APOBEC2	0.781645	1.01377	4.30014	0.235753	0.813624	NA
APOBEC3A	2.57384	-0.22222	1.47514	-0.150644	0.880257	NA
APOBEC3B	96.4854	0.443217	0.277235	1.59871	0.109886	0.360046
APOBEC3B-AS1	12.1538	-0.73041	0.669343	-1.09124	0.275169	NA
APOBEC3C	330.276	-0.38351	0.163374	-2.34743	0.0189033	0.131675
APOBEC3D	22.8634	0.0948527	0.587045	0.161576	0.871639	NA
APOBEC3F	93.9899	-0.927328	0.296077	-3.13205	0.00173591	0.0291865
APOBEC3G	7.41871	0.637203	1.02896	0.619269	0.535739	NA
APOBEC3H	0.966761	4.57252	5.11522	0.893906	0.371372	NA
APOBR	5.3959	1.21361	1.42812	0.849797	0.395438	NA
APOC1	778.732	0.0569023	0.1167	0.487594	0.625838	0.836297
APOC3	0.667381	0	6.66256	0	1	NA
APOC4-APOC2	0.60154	2.35772	6.60407	0.357011	0.721084	NA
APOD	2.90005	-1.25968	1.7685	-0.712286	0.476288	NA
APOE	49.1682	-0.0971746	0.455908	-0.213145	0.831214	NA
APOL2	189.817	0.138459	0.215611	0.642168	0.520764	0.769867
APOLD1	22.2729	-0.0116945	0.798648	-0.0146429	0.988317	NA
APOM	376.398	-0.0258059	0.152332	-0.169406	0.865477	0.947501
APOO	886.343	0.121695	0.111607	1.09039	0.27554	0.575532
APOOL	322.811	0.0227663	0.254602	0.089419	0.928749	0.971996
APOPT1	1149.82	-0.186876	0.149869	-1.24692	0.212425	0.50628
APP	16192.1	0.0983857	0.0665239	1.47895	0.139153	0.406721
APPBP2	987.085	0.217381	0.125111	1.7375	0.0822984	0.311362
APPL1	2189.59	0.0377293	0.13145	0.287025	0.774093	0.907114
APPL2	1026.64	-0.111167	0.139819	-0.795076	0.426569	0.707921
APRT	8301.23	-0.160504	0.103002	-1.55826	0.119173	0.376497
APTR	395.044	0.0182465	0.196101	0.0930467	0.925866	0.970985
APTX	1776.81	0.211933	0.119053	1.78015	0.0750506	0.295718
AQP1	2.21842	1.09463	2.5609	0.427441	0.669058	NA
AQP11	44.5941	-0.119978	0.461682	-0.259872	0.794963	NA
AQP12B	0.400959	0	6.66256	0	1	NA
AQP3	111.874	-0.793571	0.405779	-1.95567	0.0505041	0.235055
AQP4	5.26862	-6.04733	2.23967	-2.7001	0.00693182	NA
AQP4-AS1	1.07421	2.13296	5.09636	0.418525	0.675563	NA
AQP5	0.647065	3.39505	5.34538	0.635138	0.525338	NA
AQP6	1.42701	-0.617627	3.63852	-0.169747	0.865209	NA
AQP7	2.4645	-2.37903	2.58438	-0.920542	0.357289	NA
AQP7P5	1.92033	0.0452446	2.35431	0.0192177	0.984667	NA
AQR	2919.57	0.147471	0.0920309	1.6024	0.109067	0.358733
AR	352.743	0.148719	0.248785	0.597783	0.549985	0.787135
ARAF	4527.55	-0.383161	0.126307	-3.03357	0.00241681	0.035822
ARAP1	2406.84	-0.161496	0.0938088	-1.72155	0.0851517	0.316147
ARAP2	257.443	0.0483265	0.250975	0.192555	0.847307	0.939255
ARAP3	115.928	-0.266231	0.383357	-0.694472	0.487386	0.748032
ARC	211.228	-2.36783	0.955933	-2.47698	0.0132499	0.107087
ARCN1	5073.84	0.328545	0.0975353	3.36848	0.000755849	0.0167795
AREG	5.03774	0.454689	1.52112	0.298917	0.765003	NA
AREL1	1555.21	0.26919	0.118444	2.27273	0.0230424	0.148926
ARF1	24087.1	0.180521	0.0835996	2.15936	0.0308226	0.17641
ARF3	4692.31	-0.257606	0.112619	-2.28742	0.0221715	0.145816
ARF4	1741.15	0.333936	0.110073	3.03376	0.00241527	0.035822
ARF4-AS1	11.4242	-0.389093	0.975573	-0.398836	0.690014	NA
ARF5	7178.52	-0.127672	0.126904	-1.00605	0.31439	0.611167
ARF6	1914.61	0.142703	0.103935	1.37301	0.169749	0.450737
ARFGAP1	3733.35	0.0112197	0.0969673	0.115706	0.907886	0.963434
ARFGAP2	2466.03	0.306642	0.0869853	3.52521	0.000423146	0.0110404
ARFGAP3	1132.36	0.404339	0.107622	3.75705	0.000171931	0.00573621
ARFGEF1	1904.87	0.0353615	0.100284	0.352614	0.724378	0.882054
ARFGEF2	1644.53	0.271532	0.1308	2.07593	0.0379003	0.198559
ARFGEF3	846.467	0.31922	0.135099	2.36286	0.0181345	0.128561
ARFIP1	888.614	0.0935385	0.146964	0.636473	0.524468	0.771987
ARFIP2	6361.53	0.245111	0.0706435	3.46968	0.00052107	0.0129212
ARFRP1	574.83	0.130196	0.17679	0.736445	0.46146	0.729976
ARG1	0.99982	0.387571	4.15821	0.0932064	0.92574	NA
ARG2	1365.09	0.187657	0.124237	1.51048	0.130921	0.395101
ARGLU1	1620.61	0.109957	0.194634	0.56494	0.572114	0.803007
ARHGAP1	1016.23	-0.0627417	0.127619	-0.491632	0.622979	0.835139
ARHGAP10	1015.85	-0.192986	0.143658	-1.34338	0.17915	0.462798
ARHGAP11A	1863.24	0.219573	0.108343	2.02665	0.0426982	0.213156
ARHGAP11B	126.581	0.820763	0.296852	2.76489	0.00569418	0.0620558
ARHGAP12	506.142	0.240962	0.175835	1.37039	0.170566	0.452205
ARHGAP17	5713.45	-0.249311	0.104474	-2.38635	0.0170167	0.124382
ARHGAP18	354.42	0.0252798	0.168551	0.149983	0.880778	0.952908
ARHGAP19	46.3497	-18.1718	6.58976	-2.75758	NA	NA
ARHGAP19-SLIT1	833.821	0.0921957	0.432453	0.213192	0.831177	0.932639
ARHGAP20	173.333	-0.372252	0.565061	-0.658782	0.510036	0.763838
ARHGAP21	3712.15	0.177009	0.0947205	1.86875	0.0616579	0.262511
ARHGAP22	580.985	-0.143033	0.155632	-0.91904	0.358074	0.651614
ARHGAP23	31.8984	-0.119749	0.569171	-0.210392	0.833362	NA
ARHGAP24	68.3132	-0.485049	0.39628	-1.22401	0.22095	NA
ARHGAP25	6.90581	0.930935	1.56224	0.595898	0.551243	NA
ARHGAP26	931.3	-0.086474	0.124969	-0.691962	0.488961	0.749349
ARHGAP27	328.034	-0.310847	0.206544	-1.505	0.132325	0.397042
ARHGAP28	88.1913	-0.412969	0.348011	-1.18666	0.235363	0.533188
ARHGAP29	915.444	-0.169325	0.126627	-1.3372	0.181158	0.465536
ARHGAP30	34.3024	-0.139891	0.547472	-0.255521	0.798321	NA
ARHGAP31	276.451	-0.00883839	0.186259	-0.0474521	0.962153	0.98438
ARHGAP31-AS1	6.83082	-0.193414	0.969536	-0.199491	0.841879	NA
ARHGAP32	1082.4	0.0581766	0.141533	0.411045	0.681039	0.860603
ARHGAP33	349.634	-0.229186	0.209916	-1.0918	0.274921	0.574944
ARHGAP35	2427.99	0.0374071	0.103849	0.360206	0.718693	0.879668
ARHGAP39	1153.49	-0.0349966	0.124513	-0.281067	0.778659	0.909092
ARHGAP4	49.4982	0.307368	0.606852	0.506496	0.612509	NA
ARHGAP40	4.34964	0.632561	1.77132	0.357114	0.721007	NA
ARHGAP42	123.141	-0.635694	0.291648	-2.17966	0.0292826	0.171188
ARHGAP44	948.913	-0.120014	0.11563	-1.03791	0.29931	0.597227
ARHGAP5	2098.48	0.119729	0.131579	0.909943	0.362853	0.655374
ARHGAP5-AS1	153.24	-0.482874	0.202432	-2.38536	0.0170623	0.124397
ARHGAP6	4.23008	-1.31758	1.6365	-0.805122	0.420749	NA
ARHGAP8	204.782	3.31507	1.82201	1.81946	0.0688419	0.281609
ARHGAP9	13.2729	0.922158	1.34677	0.684716	0.493523	NA
ARHGDIA	27457.2	-0.580272	0.134024	-4.32962	1.4937e-05	0.000874508
ARHGDIB	7.30544	-0.47366	1.62431	-0.291607	0.770587	NA
ARHGDIG	225.251	-0.156797	0.264883	-0.591947	0.553886	0.78941
ARHGEF1	1696.04	0.0138484	0.0922329	0.150146	0.880649	0.952908
ARHGEF10	1122.86	0.124067	0.115635	1.07292	0.283309	0.584376
ARHGEF10L	222.23	-0.240933	0.234307	-1.02828	0.303819	0.600586
ARHGEF11	1899.07	-0.0115146	0.11034	-0.104356	0.916887	0.967192
ARHGEF12	3160.96	0.253309	0.127189	1.99159	0.0464162	0.223095
ARHGEF15	2.14584	1.62571	6.55007	0.248197	0.803982	NA
ARHGEF16	160.57	-0.622616	0.288815	-2.15576	0.0311022	0.177503
ARHGEF17	477.023	-0.152301	0.169405	-0.899037	0.368633	0.66025
ARHGEF18	1739.22	-0.135264	0.101433	-1.33354	0.182354	0.466955
ARHGEF19	65.9951	-0.205548	0.383683	-0.535723	0.59215	NA
ARHGEF2	1808.15	-0.0623856	0.102837	-0.606643	0.544088	0.783347
ARHGEF25	1018.72	-0.270953	0.175231	-1.54626	0.122041	0.381639
ARHGEF26	961.443	0.124949	0.118284	1.05635	0.29081	0.592178
ARHGEF26-AS1	15.3821	0.45489	0.882561	0.515421	0.606259	NA
ARHGEF28	83.8188	0.00879186	0.475812	0.0184776	0.985258	0.99484
ARHGEF3	377.129	-0.487918	0.260117	-1.87576	0.0606879	0.260486
ARHGEF33	7.47068	0.953065	1.29679	0.734942	0.462375	NA
ARHGEF35	1.20087	-0.132013	3.16296	-0.0417372	0.966708	NA
ARHGEF37	17.6504	-1.14463	0.9407	-1.21678	0.223687	NA
ARHGEF38	35.1306	-0.688235	0.503632	-1.36654	0.171768	NA
ARHGEF39	2626.11	-0.192503	0.0856042	-2.24876	0.024528	0.155111
ARHGEF4	391.78	-0.155155	0.177484	-0.874189	0.382015	0.671003
ARHGEF40	413.687	-0.522368	0.155895	-3.35076	0.000805891	0.0174906
ARHGEF5	24.5452	-0.188102	0.632514	-0.297387	0.766171	NA
ARHGEF6	235.795	0.489991	0.229493	2.1351	0.0327529	0.182041
ARHGEF7	891.615	0.0862055	0.146617	0.587964	0.556557	0.790739
ARHGEF7-AS2	0.331873	-1.1532	6.63803	-0.173726	0.86208	NA
ARHGEF9	495.019	0.31473	0.194797	1.61568	0.106163	0.35395
ARID1A	6394.7	-0.0585167	0.0985917	-0.593525	0.55283	0.788972
ARID1B	4904.18	-0.069786	0.0940131	-0.742301	0.457905	0.727435
ARID2	2536.9	0.0509674	0.106135	0.480213	0.631076	0.838346
ARID3A	686.76	-0.24864	0.148987	-1.66887	0.0951433	0.334087
ARID3B	1342.52	-0.00499961	0.143961	-0.0347289	0.972296	0.989177
ARID3C	22.5495	-0.328315	0.456497	-0.719205	0.472014	NA
ARID4A	792.488	0.267835	0.160131	1.67259	0.0944073	0.332671
ARID4B	1780.52	0.0964408	0.142275	0.677848	0.497868	0.754353
ARID5A	807.745	-0.112829	0.142262	-0.79311	0.427714	0.708743
ARID5B	391.719	-0.478022	0.230993	-2.06942	0.0385064	0.200501
ARIH1	1421.76	0.35894	0.0904395	3.96884	7.22241e-05	0.00311811
ARIH2	3600.98	0.306334	0.0709655	4.31666	1.58409e-05	0.000905343
ARIH2OS	254.708	0.306783	0.183743	1.66963	0.0949923	0.333752
ARL1	1718.52	-0.0525811	0.147226	-0.357145	0.720984	0.880379
ARL10	187.653	0.572283	0.217087	2.63619	0.00838418	0.0797671
ARL13B	1071.55	0.0754059	0.153553	0.491073	0.623375	0.835259
ARL14	0.465043	0	6.66256	0	1	NA
ARL14EP	353.72	0.119503	0.202651	0.589697	0.555394	0.790072
ARL15	239.914	0.187444	0.212777	0.880942	0.378349	0.668376
ARL16	1185.51	0.0884862	0.112888	0.783842	0.433133	0.712313
ARL17A	519.207	0.0503411	0.151133	0.333093	0.739064	0.889873
ARL17B	443.697	-0.0554554	0.175602	-0.315802	0.752153	0.895966
ARL2	2937.72	0.188393	0.106757	1.76468	0.0776175	0.301088
ARL2-SNX15	2673.3	-0.136546	0.108214	-1.26181	0.207016	0.499518
ARL2BP	1562.78	-0.00750794	0.121735	-0.0616746	0.950822	0.979529
ARL3	945.923	-0.0323294	0.152735	-0.211669	0.832365	0.933108
ARL4A	81.7074	0.0122813	0.428713	0.0286468	0.977146	0.991566
ARL4C	211	0.264847	0.197466	1.34123	0.179846	0.463997
ARL4D	106.763	-0.255013	0.256705	-0.993408	0.320511	0.616245
ARL5A	734.935	0.213712	0.215126	0.993429	0.320501	0.616245
ARL5B	432.074	0.470362	0.199883	2.35319	0.0186132	0.130412
ARL5C	0.358086	0	6.66256	0	1	NA
ARL6	515.877	-0.0236168	0.161015	-0.146674	0.883389	0.953525
ARL6IP1	3076.3	0.199099	0.089345	2.22843	0.0258518	0.160183
ARL6IP4	4333.27	-0.0840158	0.122983	-0.683148	0.494513	0.752619
ARL6IP5	782.851	-0.112508	0.134158	-0.838625	0.40168	0.685867
ARL6IP6	1341.53	0.180961	0.114088	1.58615	0.112706	0.364408
ARL8A	779.391	-0.121847	0.176238	-0.69138	0.489327	0.749381
ARL8B	388.958	0.225023	0.13956	1.61238	0.10688	0.355056
ARL9	3.14688	0.867262	2.12021	0.409046	0.682506	NA
ARMC1	468.626	0.258092	0.173887	1.48425	0.137744	0.405335
ARMC10	548.136	0.127063	0.161736	0.78562	0.43209	0.711419
ARMC12	2.02282	0.152545	2.47419	0.0616548	0.950838	NA
ARMC2	99.27	0.1846	0.370411	0.498365	0.618227	0.832393
ARMC3	13.4732	2.25438	1.08876	2.07059	0.0383969	NA
ARMC4	225.337	-0.226486	0.222897	-1.01611	0.309579	0.605755
ARMC4P1	9.91116	0.14955	0.894905	0.167113	0.867282	NA
ARMC5	1452.48	-0.498374	0.140488	-3.54745	0.000388979	0.0103515
ARMC6	5199.63	-0.0505772	0.0724786	-0.697823	0.485288	0.746375
ARMC7	656.723	-0.138775	0.137426	-1.00981	0.312586	0.609385
ARMC8	1038.95	0.285083	0.118676	2.40219	0.0162971	0.121588
ARMC9	895.175	0.0912645	0.120132	0.7597	0.447434	0.721428
ARMCX1	0.468603	-0.547957	6.62839	-0.0826682	0.934115	NA
ARMCX2	116.245	-0.293249	0.330019	-0.888582	0.374228	0.664716
ARMCX3	440.563	0.546483	0.175493	3.11399	0.00184576	0.0302634
ARMCX4	81.0104	0.536438	0.315578	1.69986	0.0891571	NA
ARMCX5	897.752	0.186518	0.12874	1.4488	0.147393	0.419297
ARMCX5-GPRASP2	160.998	0.200147	0.187537	1.06724	0.285864	0.587087
ARMCX6	782.598	-0.115134	0.183107	-0.628782	0.529492	0.774334
ARMS2	0.382433	1.77001	6.62729	0.26708	0.789408	NA
ARMT1	1244.16	-0.173295	0.102253	-1.69477	0.0901191	0.326415
ARNT	2759.5	-0.0503612	0.114008	-0.441733	0.658683	0.850698
ARNT2	306.859	0.0114386	0.197112	0.0580312	0.953724	0.980985
ARNTL	322.24	0.289636	0.141543	2.04627	0.0407299	0.207136
ARNTL2	366.591	0.0036349	0.179193	0.0202848	0.983816	0.994687
ARNTL2-AS1	8.00542	0.405015	0.931989	0.43457	0.663874	NA
ARPC1A	4250.43	0.188343	0.0923218	2.04007	0.0413435	0.208665
ARPC1B	885.196	-0.192645	0.147093	-1.30968	0.190303	0.47683
ARPC2	7286.34	0.19509	0.0726455	2.6855	0.00724208	0.0726792
ARPC3	3335.9	-0.0997579	0.0931851	-1.07053	0.284379	0.586225
ARPC4	948.281	0.459448	0.185465	2.47728	0.0132389	0.107087
ARPC4-TTLL3	116.803	-1.71798	3.87829	-0.442975	0.657784	0.850266
ARPC5	2577.97	-0.324664	0.156086	-2.08003	0.0375224	0.197346
ARPC5L	991.466	0.0876061	0.148328	0.590625	0.554771	0.789655
ARPIN	251.168	0.307484	0.206959	1.48573	0.137351	0.404848
ARPP19	449.248	0.0374694	0.20232	0.185199	0.853073	0.942085
ARR3	7.20732	-0.239205	1.15936	-0.206325	0.836537	NA
ARRB1	281.53	-0.0971072	0.15819	-0.613866	0.539304	0.780034
ARRB2	6573.14	-0.247254	0.117153	-2.11052	0.0348133	0.188277
ARRDC1	923.535	-0.23431	0.123569	-1.89619	0.0579348	0.253957
ARRDC1-AS1	1145.59	-0.153764	0.14053	-1.09418	0.273878	0.574488
ARRDC2	208.972	-0.316426	0.241124	-1.3123	0.18942	0.475805
ARRDC3	430.997	0.458947	0.206035	2.22753	0.0259121	0.160368
ARRDC3-AS1	20.4967	0.244201	0.768912	0.317593	0.750793	NA
ARRDC4	519.804	-0.0229543	0.204195	-0.112414	0.910496	0.964669
ARRDC5	14.6717	-0.704016	0.670948	-1.04928	0.294047	NA
ARSA	535.644	-0.113306	0.155408	-0.729092	0.465946	0.732837
ARSB	413.477	0.0820146	0.184163	0.445336	0.656077	0.84946
ARSE	5.72024	-1.36742	1.65656	-0.825455	0.409113	NA
ARSG	179.311	0.167508	0.239366	0.699797	0.484054	0.745587
ARSI	1.92902	2.69966	6.21841	0.43414	0.664187	NA
ARSJ	84.131	-0.0807529	0.30478	-0.264955	0.791044	0.915434
ARSK	246.487	0.115936	0.266898	0.434382	0.664011	0.853423
ART1	2.67205	0.155525	2.50314	0.0621321	0.950458	NA
ART5	248.719	-0.315904	0.244043	-1.29446	0.195507	0.482813
ARTN	2.85133	1.29483	2.18885	0.591559	0.554146	NA
ARV1	2843.99	0.144768	0.0866771	1.6702	0.0948799	0.333455
ARVCF	454.071	0.204609	0.157664	1.29775	0.194372	0.481318
ARX	2.06055	-4.12498	3.45244	-1.1948	0.232165	NA
ASAH1	1043.13	0.0705255	0.111136	0.634587	0.525698	0.772091
ASAH2	118.179	0.261813	0.31748	0.82466	0.409565	0.692412
ASAH2B	385.068	0.38773	0.197892	1.9593	0.0500772	0.234045
ASAP1	3291.22	-0.0570342	0.119227	-0.478366	0.63239	0.839353
ASAP1-IT2	0.756702	1.29208	4.79422	0.269507	0.787539	NA
ASAP2	543.28	-0.0832454	0.186612	-0.446089	0.655533	0.849278
ASAP3	310.16	-0.128194	0.197396	-0.649428	0.516062	0.766746
ASB1	558.514	0.00654422	0.142942	0.0457824	0.963484	0.984704
ASB10	0.516335	3.57069	4.70688	0.75861	0.448086	NA
ASB12	19.2105	-0.10304	0.798877	-0.128981	0.897373	NA
ASB13	1759.25	0.151698	0.0800344	1.89541	0.0580379	0.254223
ASB14	4.67951	-0.875262	1.28091	-0.683312	0.49441	NA
ASB16	2.21107	-1.68652	2.20598	-0.764523	0.444556	NA
ASB16-AS1	299.524	0.119402	0.276207	0.43229	0.66553	0.854126
ASB18	5.3037	-0.553965	1.21992	-0.4541	0.649757	NA
ASB2	1.60991	-1.81468	3.20437	-0.566315	0.57118	NA
ASB5	2.74187	-0.766949	2.90057	-0.264413	0.791462	NA
ASB6	1933.77	-0.383967	0.116493	-3.29604	0.00098057	0.0198128
ASB7	186.196	0.211697	0.240089	0.881746	0.377914	0.668128
ASB8	570.964	0.133763	0.128877	1.03791	0.29931	0.597227
ASCC1	1368.67	0.000388007	0.121175	0.00320205	0.997445	0.99873
ASCC2	4662.75	-0.0132866	0.0616213	-0.215617	0.829286	0.931763
ASCC3	4100.75	0.141195	0.114835	1.22955	0.218864	0.51425
ASCL2	0.380685	3.39124	6.58036	0.515358	0.606303	NA
ASCL5	2.69435	3.52295	3.0545	1.15336	0.248762	NA
ASF1A	933.65	0.14649	0.13056	1.12201	0.261856	0.561544
ASF1B	766.113	0.186877	0.14992	1.24652	0.212575	0.50628
ASGR1	12.4551	0.881934	0.990349	0.890528	0.373182	NA
ASH1L	3825.89	0.067791	0.144555	0.468963	0.639096	0.840571
ASH1L-AS1	149.053	-0.197698	0.262811	-0.752243	0.451905	0.724614
ASH2L	1960.04	0.061263	0.0832499	0.735893	0.461796	0.730068
ASIC1	1753.68	-0.0605135	0.126799	-0.477239	0.633192	0.839373
ASIC2	0.368638	-3.11399	6.59802	-0.471958	0.636957	NA
ASIC3	136.886	-0.21248	0.33127	-0.641413	0.521255	0.769867
ASIC4	2.94492	2.70226	2.37742	1.13663	0.255692	NA
ASIP	0.904168	0	4.55159	0	1	NA
ASL	606.056	0.0208338	0.143364	0.145321	0.884458	0.953818
ASMTL	993.663	-0.0265199	0.142797	-0.185718	0.852666	0.941983
ASNA1	4446.53	-0.0676633	0.0825995	-0.819173	0.412688	0.694974
ASNS	7776.94	0.831856	0.071759	11.5924	4.50513e-31	6.75882e-28
ASNSD1	2700.74	0.0356688	0.110791	0.321947	0.747493	0.893566
ASPDH	6.51537	1.71492	1.13125	1.51595	0.129533	NA
ASPG	4.39692	-0.987584	1.77458	-0.556516	0.577858	NA
ASPH	1648.4	0.323058	0.116301	2.77778	0.00547323	0.0604321
ASPHD1	95.2263	-0.0812055	0.345338	-0.235148	0.814094	0.92605
ASPHD2	189.854	0.0784456	0.288344	0.272055	0.785579	0.912568
ASPM	7498.62	0.262039	0.109802	2.38647	0.0170112	0.124382
ASPN	0.374791	-4.63914	6.57174	-0.705923	0.480236	NA
ASPRV1	20.8118	0.008725	0.689902	0.0126467	0.98991	NA
ASPSCR1	1224.99	-0.136084	0.107467	-1.26628	0.205412	0.49785
ASRGL1	985.98	0.0454234	0.129816	0.349907	0.726408	0.883022
ASS1	1337.28	0.0503505	0.104486	0.481886	0.629887	0.838323
ASTE1	640.878	0.0418938	0.126256	0.331817	0.740027	0.890317
ASTL	0.675447	2.90632	6.40507	0.453753	0.650007	NA
ASTN1	40.3141	-0.750058	0.543892	-1.37906	0.167877	NA
ASTN2	136.241	0.116669	0.317401	0.367575	0.71319	0.877829
ASUN	4063.07	-0.0071264	0.0683881	-0.104205	0.917006	0.967192
ASXL1	3644.35	0.163077	0.0789791	2.0648	0.0389415	0.201542
ASXL2	1895.55	0.223558	0.13997	1.59718	0.110226	0.360471
ASXL3	188.872	-0.304559	0.30661	-0.99331	0.320559	0.616245
ATAD1	2886.55	0.290321	0.10591	2.7412	0.00612144	0.0649598
ATAD2	5118.01	0.224804	0.0871587	2.57925	0.00990139	0.0896404
ATAD2B	1080.52	0.401033	0.179155	2.23847	0.0251904	0.157631
ATAD3A	5633.17	-0.0191647	0.0849948	-0.225481	0.821605	0.928925
ATAD3B	3826.42	-0.106106	0.102095	-1.03929	0.29867	0.597227
ATAD3C	284.566	0.440957	0.226399	1.9477	0.0514509	0.237597
ATAD5	1278.62	0.0515946	0.120666	0.427581	0.668956	0.855479
ATAT1	548.562	0.0152233	0.186721	0.0815296	0.935021	0.974272
ATE1	1454.23	0.290421	0.0991784	2.92827	0.00340852	0.0448565
ATE1-AS1	10.7312	0.229908	0.892639	0.25756	0.796747	NA
ATF1	1569.93	0.0737247	0.119556	0.616653	0.537464	0.778937
ATF2	1989.49	0.178578	0.090439	1.97457	0.0483175	0.228243
ATF3	2605.24	0.420106	0.155924	2.69431	0.00705346	0.0716813
ATF4	28565.1	0.377074	0.0769506	4.90021	9.57347e-07	9.57141e-05
ATF5	484.678	-0.922329	0.170295	-5.41608	6.09203e-08	8.3087e-06
ATF6	3990.48	0.319467	0.0942995	3.38779	0.000704569	0.0158654
ATF6B	4583.95	0.0722752	0.151407	0.477359	0.633107	0.839373
ATF7	814.276	0.0233606	0.160967	0.145127	0.884611	0.953818
ATF7IP	3368.63	0.0341189	0.114151	0.298892	0.765022	0.901825
ATF7IP2	186.426	0.0837638	0.251197	0.333459	0.738788	0.889807
ATG10	78.2107	0.381575	0.377806	1.00997	0.312507	NA
ATG101	559.975	0.0476758	0.134558	0.354315	0.723103	0.881203
ATG12	1471.15	0.0301882	0.137564	0.219448	0.826301	0.930383
ATG13	2915.73	0.151317	0.0921441	1.64218	0.100554	0.344505
ATG14	321.633	-0.0265591	0.202725	-0.131011	0.895767	0.957688
ATG16L1	913.867	0.204537	0.133296	1.53446	0.124916	0.386603
ATG16L2	325.734	0.219659	0.193902	1.13284	0.257283	0.556858
ATG2A	3453.2	-0.188575	0.0918826	-2.05234	0.0401363	0.205351
ATG2B	1684.26	0.249715	0.14503	1.72182	0.0851024	0.316147
ATG3	1807.86	0.096755	0.100012	0.967436	0.333326	0.629121
ATG4A	960.985	0.20423	0.111423	1.83293	0.0668132	0.276229
ATG4B	2355.09	0.159703	0.095904	1.66523	0.0958662	0.335448
ATG4C	1243.61	-0.000460156	0.113162	-0.00406635	0.996756	0.998484
ATG4D	1784.33	-0.0871126	0.0850574	-1.02416	0.305758	0.602184
ATG5	1546.01	0.0286367	0.101393	0.282434	0.777611	0.908717
ATG7	1037.37	0.0893228	0.1073	0.832456	0.405152	0.68872
ATG9A	6760.81	-0.000466756	0.0976005	-0.00478231	0.996184	0.998484
ATG9B	15.3646	-1.48336	0.878177	-1.68914	0.0911927	NA
ATHL1	371.931	0.0417459	0.227396	0.183583	0.854341	0.942613
ATIC	10838.8	0.0605803	0.0702149	0.862785	0.388256	0.675219
ATL1	182.73	-0.282897	0.25989	-1.08852	0.276364	0.576671
ATL2	1969.33	0.00576831	0.0964895	0.0597817	0.952329	0.980262
ATL3	535.679	-0.0201752	0.164515	-0.122634	0.902397	0.960478
ATM	1002.94	0.474258	0.289072	1.64063	0.100875	0.344874
ATMIN	2886.13	0.0805044	0.0782987	1.02817	0.30387	0.600586
ATN1	12242.4	-0.399828	0.175589	-2.27706	0.0227825	0.147963
ATOH1	12.0875	-0.820243	1.26402	-0.648917	0.516392	NA
ATOH7	6.02604	-0.362214	1.29267	-0.280206	0.77932	NA
ATOH8	28.1119	-0.907643	0.56567	-1.60454	0.108594	NA
ATOX1	493.133	-0.204171	0.153942	-1.32629	0.184745	0.469272
ATP10D	555.588	0.101112	0.225361	0.448668	0.653671	0.847963
ATP11A	578.44	0.319982	0.199051	1.60754	0.107936	0.35699
ATP11A-AS1	0.326515	-1.13105	6.56598	-0.17226	0.863233	NA
ATP11B	2179.4	0.201836	0.115233	1.75156	0.0798502	0.306266
ATP11C	3428.98	0.20828	0.086001	2.42183	0.0154427	0.117753
ATP12A	14.7736	-0.754705	1.1065	-0.682067	0.495197	NA
ATP13A1	6323.14	-0.0139986	0.0964716	-0.145106	0.884628	0.953818
ATP13A2	5598.26	0.00594837	0.101555	0.0585726	0.953293	0.980912
ATP13A3	1527.68	0.233324	0.17576	1.32751	0.184339	0.46909
ATP13A4	0.709749	3.35897	5.3148	0.632004	0.527384	NA
ATP13A5	1.20453	-2.37827	3.34972	-0.709989	0.477711	NA
ATP13A5-AS1	3.5867	-0.102277	2.1163	-0.0483283	0.961455	NA
ATP1A1	42330.6	0.114143	0.0634849	1.79796	0.0721836	0.289845
ATP1A1-AS1	2066.57	0.291195	0.264542	1.10075	0.271005	0.571591
ATP1A2	1.09009	-0.770551	2.50903	-0.307111	0.758759	NA
ATP1A3	1379.73	-0.00827642	0.102785	-0.0805214	0.935823	0.97434
ATP1A4	0.76961	0	5.12227	0	1	NA
ATP1B1	552.21	0.0371981	0.161275	0.23065	0.817587	0.926928
ATP1B2	79.0586	-0.729797	0.460252	-1.58565	0.112819	NA
ATP1B3	2594.72	0.236427	0.10987	2.15187	0.0314073	0.178132
ATP1B4	0.925989	-1.24671	6.66256	-0.187122	0.851565	NA
ATP23	255.579	-0.45307	0.251476	-1.80164	0.0716022	0.288326
ATP2A1	119.612	0.0816588	0.241874	0.337609	0.735658	0.88817
ATP2A1-AS1	733.601	-0.45043	0.139824	-3.22141	0.00127561	0.0238471
ATP2A2	15145.1	0.386585	0.0776777	4.97679	6.46478e-07	6.87111e-05
ATP2A3	111.361	-0.323972	0.378948	-0.854924	0.392593	0.6786
ATP2B1	4279.12	0.190041	0.0830629	2.28792	0.0221423	0.145816
ATP2B2	0.666702	-3.44393	5.33123	-0.645991	0.518285	NA
ATP2B3	17.6185	-1.21812	1.02949	-1.18323	0.23672	NA
ATP2B4	697.922	0.124899	0.137336	0.90944	0.363118	0.655557
ATP2C1	2089.18	0.48472	0.0989497	4.89865	9.64957e-07	9.57141e-05
ATP2C2	1.00631	1.40424	2.98923	0.469768	0.638521	NA
ATP4A	3.77738	1.06263	1.7064	0.62273	0.533462	NA
ATP5A1	17384.9	0.102143	0.0658137	1.552	0.120662	0.378908
ATP5B	50464	0.00164422	0.0532302	0.0308889	0.975358	0.990712
ATP5C1	11796.1	-0.0757182	0.0823285	-0.919708	0.357725	0.651614
ATP5D	4314.04	-0.192334	0.0987872	-1.94695	0.0515405	0.237827
ATP5E	3280.41	-0.0395755	0.126355	-0.313208	0.754123	0.896978
ATP5F1	10161.8	0.0942258	0.084389	1.11656	0.264181	0.563794
ATP5G1	4445.32	-0.0895783	0.102369	-0.875057	0.381543	0.670818
ATP5G2	22128.2	-0.0765511	0.101864	-0.751502	0.45235	0.724614
ATP5G3	9280.13	-0.149228	0.0874785	-1.70588	0.0880308	0.323202
ATP5H	3678.69	-0.10134	0.0826918	-1.22551	0.220383	0.516105
ATP5I	3368.62	0.114173	0.169848	0.672208	0.501451	0.757034
ATP5J	9589.08	-0.121143	0.124851	-0.970293	0.3319	0.627417
ATP5J2	9925.04	-0.461282	0.109873	-4.19831	2.68916e-05	0.00136183
ATP5J2-PTCD1	3592.52	-0.00979524	0.112523	-0.0870514	0.930631	0.972523
ATP5L	11345.6	-0.471904	0.10017	-4.71103	2.46469e-06	0.000202611
ATP5L2	35.3925	-0.0049649	0.372702	-0.0133214	0.989371	NA
ATP5O	8595.08	-0.130876	0.0771123	-1.69722	0.0896557	0.326164
ATP5S	256.969	-0.00712877	0.18506	-0.0385215	0.969272	0.987615
ATP5SL	2931.82	-0.286854	0.110844	-2.58791	0.00965601	0.0879298
ATP6	321897	-0.0659569	0.133346	-0.494628	0.620863	0.833992
ATP6AP1	9043.92	0.0131425	0.0713957	0.18408	0.853951	0.942447
ATP6AP1L	59.0666	0.48932	0.482192	1.01478	0.310209	NA
ATP6AP2	2839.76	0.00609517	0.0865293	0.0704406	0.943843	0.977817
ATP6V0A1	7888.36	0.23689	0.103972	2.27839	0.0227031	0.147527
ATP6V0A2	1884.96	0.603127	0.109778	5.49405	3.92822e-08	5.74957e-06
ATP6V0A4	0.616881	-1.73818	5.49978	-0.316045	0.751968	NA
ATP6V0B	3367.18	0.056194	0.105369	0.533306	0.593822	0.819512
ATP6V0C	10029.5	-0.109815	0.148307	-0.74046	0.459021	0.728439
ATP6V0D1	3425.08	0.0872371	0.107343	0.812696	0.416392	0.69838
ATP6V0D2	2.98866	0.067922	2.77926	0.0244389	0.980503	NA
ATP6V0E1	1235.63	-0.0411128	0.130268	-0.315601	0.752306	0.895966
ATP6V0E2	8539.68	-0.349671	0.113961	-3.06834	0.00215249	0.0336276
ATP6V0E2-AS1	236.874	-0.178039	0.275906	-0.645287	0.518741	0.768444
ATP6V1A	1388.89	0.394746	0.122908	3.21173	0.0013194	0.0243997
ATP6V1B1	52.8199	0.602984	0.521449	1.15636	0.247533	NA
ATP6V1B1-AS1	118.738	-0.739005	0.342981	-2.15465	0.0311893	0.177736
ATP6V1B2	3699.16	0.215799	0.0738208	2.92329	0.00346357	0.0451845
ATP6V1C1	1338.89	0.01106	0.163929	0.0674681	0.946209	0.978157
ATP6V1C2	2335.2	0.220384	0.114298	1.92815	0.0538361	0.243643
ATP6V1D	1247.79	-0.0423613	0.150184	-0.282062	0.777896	0.908908
ATP6V1E1	1896.07	0.131285	0.102276	1.28363	0.19927	0.488388
ATP6V1E2	25.1848	0.10233	0.692218	0.14783	0.882477	NA
ATP6V1F	7314.67	-0.209928	0.10784	-1.94665	0.0515762	0.237901
ATP6V1G1	4377.12	0.135859	0.0949945	1.43018	0.152665	0.426618
ATP6V1G2	16.5889	-0.887829	0.797311	-1.11353	0.265481	NA
ATP6V1G2-DDX39B	4167.16	0.250709	0.736907	0.340217	0.733693	0.887364
ATP6V1H	825.889	0.136709	0.213029	0.641739	0.521043	0.769867
ATP7A	649.897	-0.0589586	0.202715	-0.290844	0.77117	0.90583
ATP7B	1499.52	0.111573	0.0872393	1.27893	0.200922	0.490933
ATP8	78163	0.46183	0.2735	1.68859	0.0912976	0.327401
ATP8A1	608.254	0.066393	0.182385	0.364027	0.715838	0.878806
ATP8A2	15.2599	0.530954	0.751863	0.706184	0.480074	NA
ATP8B1	27.1985	-0.551003	0.624786	-0.881907	0.377827	NA
ATP8B2	3892.71	0.0356997	0.0706425	0.505358	0.613308	0.82968
ATP8B3	14.7765	-0.92135	0.816864	-1.12791	0.259358	NA
ATP8B4	2.33335	-1.84352	2.63031	-0.700876	0.48338	NA
ATP9A	558.567	-0.1812	0.179232	-1.01098	0.312027	0.60844
ATP9B	373.429	0.106142	0.195837	0.541994	0.587823	0.814389
ATPAF1	2743.53	0.0846302	0.0955783	0.885455	0.375911	0.666227
ATPAF2	979.031	0.254184	0.129334	1.96533	0.0493763	0.232034
ATPIF1	7294.17	-0.126709	0.106228	-1.1928	0.232949	0.529952
ATR	2134.85	0.31054	0.120948	2.56754	0.0102422	0.0915317
ATRAID	2988.62	-0.0874487	0.107574	-0.81292	0.416264	0.69838
ATRIP	1593.11	-0.00212878	0.118434	-0.0179744	0.985659	0.99484
ATRN	1543.79	0.247252	0.108082	2.28764	0.0221585	0.145816
ATRNL1	174.553	-0.04406	0.285742	-0.154195	0.877456	0.952104
ATRX	2390.46	0.206856	0.157487	1.31347	0.189023	0.47551
ATXN1	247.581	-0.381958	0.264143	-1.44603	0.14817	0.420609
ATXN10	4597.82	0.242759	0.0777322	3.12302	0.00179008	0.0296478
ATXN1L	863.618	-0.0756227	0.209103	-0.361653	0.717612	0.879668
ATXN2	5786.87	-0.0957464	0.145653	-0.657359	0.51095	0.763838
ATXN2L	16639.2	-0.236948	0.18151	-1.30542	0.191748	0.47861
ATXN3	501.521	0.0756625	0.145899	0.518595	0.604043	0.825992
ATXN3L	0.690187	0.676627	4.55211	0.14864	0.881838	NA
ATXN7	911.566	0.0970379	0.141189	0.687293	0.491898	0.750685
ATXN7L1	354.596	-0.153043	0.218126	-0.701624	0.482914	0.744882
ATXN7L2	1200.29	-0.230994	0.144411	-1.59956	0.109696	0.35969
ATXN7L3	800.839	0.123016	0.122239	1.00636	0.314243	0.611167
ATXN7L3B	296.335	0.108767	0.171292	0.634979	0.525442	0.771987
AUH	465.872	0.25414	0.161993	1.56883	0.116687	0.372766
AUNIP	974.341	0.242928	0.152152	1.59662	0.110351	0.360585
AUP1	9613.95	-0.0489676	0.105755	-0.463026	0.643345	0.841608
AURKA	3546.41	-0.103593	0.0890277	-1.1636	0.244585	0.543302
AURKAIP1	5325.84	-0.242827	0.095396	-2.54546	0.0109133	0.0953289
AURKB	6759.18	-0.185774	0.0659696	-2.81605	0.00486175	0.0562146
AURKC	21.5931	0.296949	0.783676	0.378918	0.704749	NA
AUTS2	3162.31	-0.243308	0.154333	-1.57652	0.114906	0.369496
AVEN	406.882	0.233673	0.172046	1.3582	0.174399	0.457473
AVIL	17.4994	0.288277	0.7594	0.379612	0.704234	NA
AVL9	610.717	0.266964	0.14386	1.85573	0.0634924	0.2671
AVPI1	178.666	-0.0649412	0.230875	-0.281283	0.778493	0.909046
AVPR1A	1.24145	-3.11613	3.69932	-0.842353	0.39959	NA
AVPR2	0.680342	1.18666	4.92045	0.241169	0.809425	NA
AWAT1	0.620404	1.76804	5.96887	0.29621	0.76707	NA
AXDND1	5.78374	-1.33906	1.59934	-0.837258	0.402448	NA
AXIN1	4033.77	-0.107186	0.0877892	-1.22095	0.222106	0.518825
AXIN2	551.385	-0.289837	0.151916	-1.90788	0.0564067	0.249629
AXL	3.52974	-0.49257	1.68087	-0.293045	0.769488	NA
AZI2	1220.08	0.320661	0.100847	3.17969	0.00147435	0.0264106
AZIN1	1479.11	0.200364	0.115545	1.73408	0.0829044	0.312234
AZIN1-AS1	12.4263	0.126363	0.860049	0.146925	0.883191	NA
AZIN2	178.443	-0.139387	0.312449	-0.44611	0.655518	0.849278
AZU1	0.313391	-1.24673	6.66256	-0.187124	0.851563	NA
B2M	4685.52	0.0709771	0.102988	0.689177	0.490712	0.749978
B3GALNT1	120.144	0.224488	0.265431	0.84575	0.397692	0.682652
B3GALNT2	2154.64	0.167993	0.0969752	1.73232	0.0832159	0.31248
B3GALT1	17.6315	-0.578072	0.780851	-0.740311	0.459111	NA
B3GALT4	3.8895	-0.356248	1.53961	-0.231389	0.817013	NA
B3GALT5	1.15253	-3.11622	3.62798	-0.858941	0.390373	NA
B3GALT5-AS1	2.96906	1.37071	2.02941	0.675425	0.499406	NA
B3GALT6	647.013	-0.0801304	0.157467	-0.508871	0.610843	0.82868
B3GAT1	6.85058	-1.48726	1.19379	-1.24583	0.212828	NA
B3GAT2	65.9256	-0.615968	0.380631	-1.61828	0.105602	NA
B3GAT3	3462.21	-0.0924282	0.1236	-0.747799	0.454581	0.72563
B3GLCT	435.61	0.0671983	0.162222	0.414236	0.678701	0.859951
B3GNT2	279.407	-0.101563	0.190471	-0.533222	0.59388	0.819512
B3GNT3	7.13542	0.339818	1.10364	0.307907	0.758153	NA
B3GNT4	79.7118	-0.343644	0.355956	-0.965412	0.334338	NA
B3GNT5	157.067	0.659071	0.408078	1.61506	0.106297	0.353978
B3GNT7	2.20842	2.48262	2.51165	0.988442	0.322936	NA
B3GNT8	19.9562	-0.44369	0.6935	-0.639783	0.522314	NA
B3GNT9	25.3087	-0.102468	0.785516	-0.130446	0.896213	NA
B3GNTL1	297.981	-0.0144325	0.166051	-0.0869158	0.930738	0.972551
B4GALNT1	808.021	-0.24598	0.127212	-1.93362	0.0531595	0.24226
B4GALNT3	938.524	-0.119953	0.131214	-0.914172	0.360626	0.65322
B4GALNT4	266.389	-0.23291	0.208737	-1.11581	0.264505	0.564071
B4GALT1	539.357	-0.0373509	0.170633	-0.218896	0.826731	0.930396
B4GALT1-AS1	5.22544	0.348152	1.64878	0.211158	0.832764	NA
B4GALT2	4899.28	-0.194777	0.124776	-1.56102	0.11852	0.375716
B4GALT3	3947.65	0.106266	0.0995056	1.06794	0.285549	0.586743
B4GALT4	721.22	0.129627	0.12754	1.01637	0.309454	0.605755
B4GALT4-AS1	21.884	-0.185443	0.531388	-0.348978	0.727106	NA
B4GALT5	738.238	-0.0232192	0.165744	-0.140091	0.888588	0.954689
B4GALT6	553.201	0.125338	0.166607	0.752298	0.451872	0.724614
B4GALT7	1168.58	-0.15764	0.122795	-1.28377	0.199221	0.488388
B4GAT1	3308.37	-0.148324	0.0782092	-1.89651	0.0578931	0.253916
B9D1	906.341	-0.0212944	0.119803	-0.177746	0.858923	0.943769
B9D2	64.3866	0.153382	0.36267	0.422925	0.67235	NA
BAALC	12.378	-0.206938	1.24808	-0.165805	0.868311	NA
BAALC-AS1	1.59944	3.92205	2.98012	1.31607	0.18815	NA
BAALC-AS2	0.974469	-0.833124	3.59879	-0.231501	0.816925	NA
BAAT	5.8403	0.648124	1.37821	0.470266	0.638165	NA
BABAM1	3514.49	-0.0451401	0.103	-0.438254	0.661202	0.852259
BACE1	488.684	0.340234	0.188601	1.80399	0.0712323	0.287572
BACE1-AS	53.6154	0.402792	0.479616	0.839823	0.401008	NA
BACE2	849.656	-0.183785	0.136113	-1.35024	0.176939	0.460553
BACH1	548.653	0.438819	0.148634	2.95236	0.00315356	0.0424446
BACH2	102.657	-0.124771	0.285093	-0.43765	0.66164	0.852496
BAD	1023.92	-0.263173	0.12872	-2.04454	0.0409	0.207649
BAG1	1190.25	0.0982993	0.125865	0.780992	0.434807	0.714088
BAG2	852.804	0.203945	0.163623	1.24643	0.212605	0.50628
BAG3	6400.47	0.241066	0.0991998	2.43011	0.0150944	0.116056
BAG4	1507.83	-0.119011	0.133884	-0.888916	0.374048	0.664624
BAG5	585.126	0.127682	0.201899	0.632406	0.527122	0.772601
BAG6	24648.7	-0.165176	0.0926552	-1.7827	0.0746353	0.2951
BAGE2	2.27615	3.13353	2.5648	1.22174	0.221805	NA
BAHCC1	1288.1	-0.47882	0.147831	-3.23896	0.00119967	0.0227464
BAHD1	3030.26	-0.176064	0.0945035	-1.86304	0.0624564	0.264223
BAIAP2	1834.13	-0.218177	0.0956077	-2.28201	0.022489	0.146851
BAIAP2-AS1	503.558	-0.194791	0.172333	-1.13032	0.258343	0.557868
BAIAP2L1	1647.87	-0.0395403	0.122522	-0.322719	0.746908	0.893536
BAIAP2L2	15.5311	0.182479	0.697626	0.261572	0.793652	NA
BAIAP3	56.1747	0.20248	0.659212	0.307155	0.758725	NA
BAK1	521.582	-0.18314	0.127168	-1.44014	0.149829	0.42252
BAMBI	415.383	0.171309	0.174516	0.981625	0.326285	0.622
BANF1	1529.53	-0.249791	0.106633	-2.34254	0.0191529	0.132988
BANP	995.213	0.236009	0.116692	2.02249	0.0431256	0.214502
BAP1	6482.56	-0.0918469	0.0568819	-1.6147	0.106377	0.354037
BARD1	705.988	0.137101	0.159784	0.858042	0.390869	0.677529
BARHL2	278.971	-0.647053	0.211612	-3.05773	0.00223021	0.0342727
BARX1	255.754	-0.212536	0.226345	-0.938989	0.347736	0.642742
BARX2	482.471	-0.491482	0.191634	-2.56469	0.0103268	0.0920134
BASP1	655.788	-0.52879	0.17342	-3.0492	0.00229455	0.0349039
BATF2	9.24004	-0.47827	1.01685	-0.470345	0.638108	NA
BATF3	169.931	-0.229053	0.265095	-0.864041	0.387566	0.675219
BAX	2531.89	-0.344735	0.0949109	-3.6322	0.000281019	0.00820629
BAZ1A	7162.72	-0.118113	0.106649	-1.10749	0.268081	0.568163
BAZ1B	7878.76	0.011302	0.0921665	0.122626	0.902403	0.960478
BAZ2A	9445.37	-0.108261	0.118856	-0.91086	0.362369	0.654944
BAZ2B	623.391	0.153166	0.182634	0.83865	0.401666	0.685867
BBC3	159.978	-0.169346	0.280418	-0.603906	0.545906	0.783885
BBIP1	493.353	0.161719	0.207836	0.778106	0.436507	0.714863
BBOF1	64.0724	0.193975	0.439603	0.44125	0.659032	NA
BBOX1	0.876911	3.35737	4.57452	0.733929	0.462992	NA
BBOX1-AS1	71.3365	0.150229	0.423765	0.354511	0.722956	NA
BBS1	750.434	0.112912	0.134438	0.839886	0.400973	0.685245
BBS10	467.747	0.0113769	0.153033	0.0743426	0.940738	0.976538
BBS12	137.218	0.229147	0.301915	0.758978	0.447866	0.721488
BBS2	1211.27	0.202553	0.112853	1.79484	0.0726793	0.29108
BBS4	1399.8	-0.077438	0.100023	-0.774198	0.438814	0.716213
BBS5	142.207	-0.102459	0.342875	-0.298822	0.765076	0.901825
BBS7	1520.93	0.335048	0.1478	2.26691	0.0233959	0.150562
BBS9	395.077	0.159809	0.189193	0.844689	0.398285	0.683193
BBX	1383.17	0.0995588	0.138546	0.718596	0.47239	0.737848
BCAM	590.479	-0.382768	0.211795	-1.80725	0.0707227	0.286653
BCAN	4.5017	1.65463	1.73473	0.953828	0.340171	NA
BCAP29	1512.12	-0.0747541	0.0946921	-0.789444	0.429853	0.709845
BCAP31	9892.86	0.0614215	0.119	0.516147	0.605751	0.826469
BCAR1	3601.73	-0.209519	0.144011	-1.45489	0.1457	0.416355
BCAR3	381.423	-0.064575	0.163093	-0.395939	0.69215	0.865643
BCAR4	0.376621	0	6.66256	0	1	NA
BCAS1	3.1907	0.201916	1.63957	0.123152	0.901987	NA
BCAS2	3169.91	0.0224769	0.113386	0.198233	0.842863	0.937835
BCAS3	1958.66	0.00552711	0.100078	0.0552282	0.955957	0.981219
BCAS4	247.701	0.107195	0.199445	0.53747	0.590943	0.816638
BCAT1	2168.05	0.285324	0.106712	2.67377	0.00750042	0.0742127
BCAT2	2148.36	-0.28891	0.07515	-3.84445	0.000120825	0.00454588
BCCIP	5439.36	0.0742127	0.120728	0.614711	0.538745	0.77949
BCDIN3D	284.887	0.058188	0.216407	0.268882	0.78802	0.913794
BCDIN3D-AS1	60.3466	0.109661	0.311371	0.352188	0.724697	NA
BCHE	80.0553	0.195229	0.408806	0.477558	0.632965	NA
BCKDHA	2367.4	-0.060751	0.0998142	-0.608641	0.542762	0.782589
BCKDHB	837.908	0.135502	0.14906	0.909045	0.363326	0.655736
BCKDK	4692.24	-0.0696224	0.107518	-0.647542	0.517281	0.767426
BCL10	274.964	-0.147449	0.2495	-0.590981	0.554533	0.789503
BCL11A	504.407	-0.200246	0.175294	-1.14234	0.253312	0.551983
BCL11B	8.78119	0.727858	1.06612	0.682714	0.494788	NA
BCL2	80.5355	-0.0769227	0.467974	-0.164374	0.869437	NA
BCL2L1	1526.25	-0.34341	0.164318	-2.08991	0.0366257	0.194162
BCL2L11	1066.96	-0.0422161	0.122757	-0.343901	0.730921	0.88573
BCL2L12	2224.41	-0.209649	0.107134	-1.95688	0.0503613	0.234833
BCL2L13	2934.42	0.20035	0.0873318	2.29412	0.0217835	0.144925
BCL2L14	0.637064	1.28187	6.65295	0.192677	0.847212	NA
BCL2L15	0.630625	1.39349	5.48349	0.254124	0.7994	NA
BCL2L2	90.5586	0.160472	0.267383	0.600159	0.5484	0.785804
BCL2L2-PABPN1	41.9862	0.117563	0.324947	0.361789	0.717509	NA
BCL3	67.75	-0.863382	0.304914	-2.83156	0.00463217	NA
BCL6	404.499	-0.180168	0.19428	-0.927362	0.353739	0.647882
BCL6B	718.442	-0.169648	0.147575	-1.14957	0.250322	0.548576
BCL7A	378.443	0.20672	0.16185	1.27723	0.201521	0.491996
BCL7B	2684.69	-0.104335	0.104768	-0.995859	0.319319	0.615773
BCL7C	3378.65	-0.194036	0.108778	-1.78377	0.0744606	0.29504
BCL9	3381.41	-0.241573	0.126336	-1.91214	0.0558577	0.248666
BCL9L	807.417	-0.453227	0.167397	-2.70749	0.00677932	0.0701426
BCLAF1	18678.2	0.0701524	0.0863103	0.812793	0.416337	0.69838
BCO1	1.38288	-2.71907	4.03411	-0.674019	0.500299	NA
BCO2	12.94	0.639086	1.06111	0.602284	0.546985	NA
BCOR	11141	-0.0484609	0.0950883	-0.509641	0.610303	0.82864
BCORL1	3204.04	-0.257851	0.137756	-1.8718	0.0612347	0.262037
BCR	5662.78	-0.0441104	0.0768175	-0.574223	0.565817	0.797038
BCS1L	2881.87	-0.0802501	0.0955765	-0.839643	0.401109	0.68538
BCYRN1	59756.7	-1.20889	0.398969	-3.03005	0.00244517	0.0360553
BDH1	172.441	-0.187562	0.241182	-0.77768	0.436758	0.715041
BDH2	173.141	-0.038109	0.239167	-0.15934	0.873401	0.951008
BDKRB2	2.21353	0.582089	1.98332	0.293492	0.769146	NA
BDNF	3.84309	-1.15825	1.50549	-0.769353	0.441684	NA
BDNF-AS	19.4338	0.932027	0.794075	1.17373	0.240505	NA
BDP1	2250.04	0.211031	0.180861	1.16681	0.243286	0.542078
BEAN1	9.40459	-1.32069	1.15396	-1.14449	0.252421	NA
BECN1	1544.64	0.361148	0.105152	3.43453	0.000593583	0.0141353
BEGAIN	38.4941	-0.469125	0.616716	-0.760683	0.446847	NA
BEND2	0.442372	-3.69862	6.58461	-0.561706	0.574316	NA
BEND3	298.29	-0.18733	0.183468	-1.02105	0.30723	0.603598
BEND4	323.694	-0.0346649	0.277839	-0.124766	0.900709	0.960148
BEND5	33.8534	-0.0679098	0.560739	-0.121108	0.903606	NA
BEND6	148.531	0.582134	0.254858	2.28416	0.0223624	0.146343
BEND7	902.057	0.266102	0.13483	1.97361	0.0484261	0.228503
BEST1	36.9176	0.820293	0.604953	1.35596	0.175111	NA
BEST2	2.04313	-0.148707	2.85406	-0.0521038	0.958446	NA
BEST3	2.05603	-0.171016	2.76963	-0.0617467	0.950765	NA
BEST4	3.23372	-0.0820108	1.7455	-0.0469842	0.962526	NA
BET1	475.349	0.348041	0.185042	1.88087	0.059989	0.258431
BET1L	97.4402	0.447038	0.244964	1.82491	0.0680144	0.27975
BEX1	370.414	0.204506	0.194066	1.0538	0.291977	0.593145
BEX2	830.661	0.142152	0.235299	0.604134	0.545755	0.783885
BEX3	4750.07	0.0214747	0.0865472	0.248127	0.804036	0.921178
BEX4	999.429	-0.016662	0.111353	-0.149632	0.881055	0.952908
BEX5	35.6802	0.00587274	0.472112	0.0124393	0.990075	NA
BFAR	2111.97	0.0555886	0.103823	0.535419	0.59236	0.818218
BFSP1	163.624	0.202877	0.266236	0.762019	0.446049	0.720154
BGLAP	52.1432	-0.0819174	0.499433	-0.164021	0.869715	NA
BGN	2.92758	4.42346	2.41323	1.833	0.066802	NA
BHLHA15	14.6461	0.843533	1.07893	0.781822	0.434319	NA
BHLHB9	164.77	-0.0347884	0.268343	-0.129642	0.89685	0.957936
BHLHE22	13.4892	-0.771701	0.956301	-0.806964	0.419687	NA
BHLHE23	3.70301	-0.908517	1.70392	-0.533194	0.5939	NA
BHLHE40	482.382	-1.20936	0.222771	-5.42873	5.67572e-08	7.82989e-06
BHLHE40-AS1	2.97257	-0.668174	1.83002	-0.365118	0.715023	NA
BHLHE41	81.2136	-0.654658	0.337166	-1.94165	0.0521799	0.23958
BHMG1	36.1407	0.251695	0.634692	0.396563	0.69169	NA
BHMT	2.04609	1.60134	2.28629	0.700412	0.48367	NA
BICC1	541.549	0.0435842	0.195179	0.223304	0.823299	0.929911
BICD1	499.316	-0.061235	0.160802	-0.38081	0.703344	0.8717
BICD2	1501.59	0.107782	0.0998516	1.07942	0.280399	0.580802
BICDL1	89.5488	0.239299	0.319087	0.749949	0.453286	0.725088
BICDL2	29.7308	-0.502603	0.744131	-0.675423	0.499407	NA
BID	903.453	-0.304128	0.121952	-2.49384	0.0126371	0.104026
BIK	14.9227	-0.671995	1.00436	-0.66908	0.503444	NA
BIN1	1090.93	-0.259953	0.1046	-2.48522	0.0129473	0.10571
BIN2	0.508141	-2.11553	5.77693	-0.366204	0.714213	NA
BIN3	600.965	-0.0207114	0.117709	-0.175954	0.86033	0.944623
BIN3-IT1	0.983883	-3.70577	4.8151	-0.769615	0.441528	NA
BIRC2	769.401	0.162035	0.13132	1.23389	0.217243	0.511792
BIRC3	5.16544	-0.59044	1.37414	-0.429681	0.667428	NA
BIRC5	14769.5	-0.702388	0.109021	-6.44268	1.1738e-10	3.0626e-08
BIRC6	5283.88	0.215263	0.10377	2.07443	0.0380396	0.198846
BIRC8	0.325656	-4.43705	6.57385	-0.674956	0.499704	NA
BISPR	2.41088	1.5962	2.15434	0.740923	0.45874	NA
BIVM	355.786	0.426323	0.180925	2.35636	0.0184552	0.130054
BIVM-ERCC5	135.799	0.362386	0.353105	1.02628	0.304758	0.601101
BLACAT1	0.372902	0	6.66256	0	1	NA
BLCAP	236.318	0.128775	0.248808	0.517568	0.60476	0.826312
BLK	0.812338	1.68825	4.0156	0.420423	0.674177	NA
BLM	3746.88	0.21695	0.0651881	3.32806	0.000874525	0.0182948
BLMH	2464.64	0.0221716	0.100028	0.221653	0.824584	0.930383
BLNK	2.03898	-2.23441	1.89444	-1.17945	0.238218	NA
BLOC1S1	872.665	-0.589546	0.455142	-1.2953	0.195216	0.482691
BLOC1S1-RDH5	932.004	-0.00855161	0.515269	-0.0165964	0.986759	0.995292
BLOC1S2	686.406	0.187245	0.182172	1.02785	0.304021	0.600586
BLOC1S3	194.796	-0.0188057	0.237546	-0.0791666	0.9369	0.974831
BLOC1S4	352.37	-0.0549619	0.233953	-0.234927	0.814266	0.926158
BLOC1S5-TXNDC5	12229.6	0.356516	0.0513055	6.94889	3.68169e-12	1.16283e-09
BLOC1S6	1373.42	0.166197	0.104212	1.5948	0.110756	0.361222
BLVRA	812.143	-0.0581754	0.136015	-0.427714	0.668859	0.855479
BLVRB	829.18	-0.244897	0.181807	-1.34702	0.177975	0.46145
BLZF1	888.66	0.276732	0.114262	2.42191	0.0154392	0.117753
BMF	14.8727	-1.69219	0.764477	-2.21353	0.0268614	NA
BMI1	2.9318	0	6.66256	0	NA	NA
BMP1	942.085	0.0357797	0.118104	0.302951	0.761928	0.900862
BMP2	288.528	-0.0676083	0.190621	-0.354674	0.722834	0.881115
BMP2K	1120.44	-0.165493	0.145071	-1.14078	0.253963	0.552587
BMP3	4.81789	-3.23279	1.65477	-1.95362	0.0507464	NA
BMP4	369.581	-0.0998598	0.159142	-0.62749	0.530338	0.77487
BMP5	4.74789	-3.44129	2.11255	-1.62897	0.10332	NA
BMP6	173.137	-0.178528	0.209652	-0.851545	0.394467	0.680327
BMP7	2577.85	-0.124615	0.0990897	-1.2576	0.208538	0.501577
BMP8A	79.075	0.0337692	0.296823	0.113769	0.909421	NA
BMP8B	162.557	0.228173	0.27027	0.844242	0.398534	0.683249
BMPER	44.1737	-0.157269	0.441848	-0.355935	0.72189	NA
BMPR1A	278.368	0.442418	0.236403	1.87145	0.0612823	0.262121
BMPR1B	61.1622	0.246167	0.428146	0.57496	0.565318	NA
BMPR1B-AS1	1.59806	-0.75894	3.64265	-0.208348	0.834957	NA
BMPR2	1111.91	0.0502186	0.158799	0.31624	0.75182	0.895966
BMS1	8497.25	0.156308	0.0874508	1.78738	0.0738756	0.293594
BMT2	165.478	-0.0074908	0.220035	-0.0340436	0.972842	0.989289
BMX	0.687359	1.28497	5.80776	0.221251	0.824897	NA
BNC1	77.4487	0.401819	0.345068	1.16446	0.244236	NA
BNC2	188.568	-0.39295	0.245527	-1.60044	0.109502	0.359394
BNIP1	571.629	0.191186	0.14	1.36561	0.17206	0.453865
BNIP2	948.989	0.264749	0.17266	1.53335	0.125189	0.386949
BNIP3	1094.14	-0.135527	0.122991	-1.10192	0.270495	0.570921
BNIP3L	666.884	0.0623785	0.146113	0.42692	0.669438	0.855617
BNIPL	17.9509	-0.0131056	0.815734	-0.016066	0.987182	NA
BOC	515.713	-0.257391	0.180551	-1.42559	0.153987	0.428705
BOD1	3707.69	0.148519	0.105379	1.40937	0.158725	0.434439
BOD1L1	2028.79	0.141004	0.12888	1.09407	0.273925	0.574488
BOD1L2	27.933	0.000867213	0.528148	0.00164199	0.99869	NA
BOK	9.91319	0.519519	0.866546	0.599528	0.548821	NA
BOK-AS1	1.02383	-1.56061	4.05268	-0.385081	0.700177	NA
BOLA1	277.716	0.0327514	0.253765	0.129062	0.897309	0.958169
BOLA2	3829.35	-0.246575	0.135181	-1.82404	0.0681463	0.279997
BOLA2-SMG1P6	2448.54	0.0246141	0.101381	0.242788	0.80817	0.92298
BOLA2B	2398.74	-0.168977	0.11245	-1.50268	0.132921	0.397935
BOLA3	2881.21	-0.193742	0.0861359	-2.24926	0.024496	0.155111
BOLA3-AS1	430.244	-0.0128728	0.222948	-0.0577389	0.953957	0.980985
BOLL	0.440131	-1.86165	6.5411	-0.284608	0.775944	NA
BOP1	13125	-0.291702	0.0819374	-3.56005	0.000370782	0.00997785
BORA	1751.15	0.202133	0.101796	1.98567	0.0470705	0.224807
BORCS5	168.296	-0.269315	0.279331	-0.964145	0.334973	0.630041
BORCS6	290.757	-0.26636	0.213863	-1.24547	0.21296	0.506712
BORCS7-ASMT	465.77	0.0927861	0.190884	0.486086	0.626906	0.836802
BORCS8	545.416	0.0228296	0.156271	0.146089	0.883851	0.953614
BORCS8-MEF2B	308.083	-0.370349	0.182039	-2.03445	0.0419065	0.210268
BPGM	409.722	0.243918	0.162002	1.50565	0.132157	0.396802
BPHL	668.531	0.305659	0.178165	1.71559	0.0862367	0.319148
BPIFA2	0.678529	0	6.66256	0	1	NA
BPIFB1	0.389415	0	6.66256	0	1	NA
BPIFC	0.4056	1.83365	6.6243	0.276807	0.781928	NA
BPNT1	1656.99	0.147913	0.124025	1.19261	0.233024	0.529952
BPTF	9895.62	-0.0374948	0.098184	-0.381883	0.702548	0.870893
BRAF	1426.19	-0.0742672	0.0959419	-0.774086	0.43888	0.716213
BRAP	1334.54	0.229957	0.110956	2.07251	0.0382181	0.199345
BRAT1	4020.26	-0.10355	0.0773554	-1.33863	0.180691	0.464932
BRCA1	3853.3	0.186719	0.107043	1.74434	0.0811007	0.308487
BRCA2	1770	0.309915	0.115542	2.68227	0.00731236	0.0730749
BRCAT54	13.108	-1.16191	1.05303	-1.10339	0.269856	NA
BRCC3	612.821	0.267289	0.175284	1.52489	0.127286	0.388923
BRD1	2211.04	0.0626322	0.0978386	0.640158	0.52207	0.770048
BRD2	40487.1	-0.000623767	0.0953689	-0.00654057	0.994781	0.997904
BRD3	2321.64	-0.184663	0.125527	-1.4711	0.141263	0.409725
BRD4	5507.09	-0.366743	0.104756	-3.50093	0.000463641	0.0118396
BRD7	3512.91	0.132737	0.0944708	1.40506	0.160003	0.436204
BRD8	4335.76	-0.0769063	0.104311	-0.737281	0.460952	0.729679
BRD9	1087.71	0.0464189	0.117683	0.39444	0.693256	0.865723
BRE	2562.7	0.0976792	0.117479	0.831458	0.405715	0.689033
BRE-AS1	70.6968	0.416645	0.349047	1.19366	0.23261	NA
BREA2	4.72262	-0.0800543	1.32956	-0.0602111	0.951987	NA
BRF1	1317.93	0.0688038	0.112296	0.612701	0.540074	0.780584
BRF2	295.544	-0.0643269	0.178782	-0.359806	0.718992	0.879668
BRI3	1652.29	-0.324025	0.169974	-1.90632	0.0566087	0.250246
BRI3BP	857.105	0.0493593	0.135417	0.364499	0.715486	0.878806
BRICD5	73.2339	0.284806	0.368701	0.772458	0.439843	NA
BRINP2	3.67473	-1.13419	2.62912	-0.431394	0.666182	NA
BRINP3	83.773	0.290144	0.382407	0.75873	0.448014	0.721488
BRIP1	1376.32	0.178245	0.140186	1.27149	0.203555	0.49515
BRIX1	3537.47	0.283006	0.11452	2.47125	0.0134643	0.108165
BRK1	1544.34	0.0383792	0.0981909	0.390863	0.695898	0.867218
BRMS1	1745.61	0.0652553	0.123211	0.52962	0.596376	0.819944
BRMS1L	488.182	0.230919	0.161663	1.42839	0.153179	0.42725
BROX	1985.58	-0.0269506	0.113269	-0.237936	0.811931	0.92453
BRPF1	3523.55	0.0872119	0.0671543	1.29868	0.194054	0.481007
BRPF3	6631.27	-0.0883322	0.0927432	-0.952438	0.340875	0.635784
BRSK1	251.134	0.0528631	0.238577	0.221577	0.824643	0.930383
BRSK2	1528.93	-0.315421	0.120353	-2.6208	0.00877232	0.0826415
BRWD1	696.091	0.123718	0.182652	0.677339	0.498191	0.754353
BRWD1-AS1	0.377499	-0.285017	6.66256	-0.0427789	0.965878	NA
BRWD1-IT2	12.7985	-0.799593	0.748727	-1.06794	0.285549	NA
BRWD3	1058.68	0.0317774	0.144526	0.219874	0.825969	0.930383
BSCL2	876.377	-0.102552	0.383632	-0.267319	0.789223	0.914576
BSDC1	4024.99	0.022637	0.113791	0.198935	0.842314	0.937835
BSG	14736.1	-0.233258	0.106659	-2.18695	0.0287463	0.16954
BSN	959.788	0.275663	0.143272	1.92405	0.0543487	0.244671
BSN-AS2	4.12908	1.08476	1.88129	0.576607	0.564205	NA
BSND	0.295091	0	6.66256	0	1	NA
BSPRY	22.2318	-0.410544	0.66114	-0.620964	0.534623	NA
BST1	21.219	0.01298	0.782733	0.0165829	0.986769	NA
BST2	1.48421	-2.49066	3.27192	-0.761221	0.446525	NA
BTAF1	3059.18	0.482702	0.110127	4.38314	1.16981e-05	0.000720003
BTBD1	5812.91	0.0449779	0.0947634	0.474634	0.635048	0.839624
BTBD10	1034.6	0.0326497	0.127109	0.256865	0.797283	0.917895
BTBD11	366.615	-0.43487	0.209662	-2.07415	0.0380653	0.198894
BTBD16	1.52977	3.72039	3.71096	1.00254	0.316083	NA
BTBD17	2.33783	-2.48869	2.34976	-1.05913	0.289543	NA
BTBD18	0.676407	-1.21586	4.90844	-0.247707	0.804361	NA
BTBD19	4.35039	-2.12575	1.37951	-1.54095	0.123329	NA
BTBD2	3708.59	-0.0690579	0.10065	-0.686121	0.492637	0.751286
BTBD3	1301.25	0.0117888	0.142562	0.0826924	0.934096	0.973602
BTBD6	1765.66	-0.0206901	0.121621	-0.17012	0.864916	0.9472
BTBD7	1124.64	-0.146593	0.137527	-1.06592	0.286458	0.587436
BTBD8	9.3839	0.950717	1.04199	0.912407	0.361555	NA
BTBD9	182.749	0.101704	0.243108	0.418349	0.675692	0.858957
BTD	419.671	0.0894038	0.153613	0.582007	0.560562	0.79338
BTF3	28631.6	0.204933	0.0751689	2.72631	0.00640476	0.0673707
BTF3L4	167.056	0.450917	0.233324	1.93258	0.0532884	0.242458
BTG1	345.98	0.270265	0.187884	1.43847	0.150301	0.423255
BTG2	249.981	-0.258601	0.26972	-0.958777	0.337671	0.632287
BTG3	784.476	0.109965	0.13427	0.818989	0.412793	0.694978
BTG4	0.935218	0	6.66256	0	1	NA
BTK	7.07517	-1.23853	1.39324	-0.888954	0.374028	NA
BTN1A1	1.1835	-1.62442	3.0488	-0.532806	0.594168	NA
BTN2A1	688.568	0.256053	0.179732	1.42464	0.154262	0.429172
BTN2A2	380.439	0.188565	0.173543	1.08656	0.277231	0.577674
BTN3A1	121.855	-0.0602466	0.265692	-0.226753	0.820616	0.928453
BTN3A2	71.9508	-0.39858	0.540511	-0.737413	0.460871	NA
BTN3A3	29.2908	0.655402	0.662271	0.989629	0.322356	NA
BTNL10	3.77912	-0.909975	2.13515	-0.426188	0.669971	NA
BTNL9	80.4188	-0.0771506	0.351791	-0.219308	0.82641	NA
BTRC	2217.24	0.0396127	0.0908294	0.436122	0.662748	0.853104
BUB1	7199.69	0.0397942	0.0749966	0.530614	0.595686	0.819512
BUB1B	4136.43	0.143956	0.100133	1.43765	0.150534	0.423512
BUB1B-PAK6	4.02275	1.38941	1.45319	0.956113	0.339015	NA
BUB3	7157.2	0.0359313	0.0796909	0.450883	0.652074	0.847082
BUD13	1891.01	-0.0678973	0.105518	-0.643464	0.519923	0.769299
BUD31	1790.17	0.273863	0.166975	1.64015	0.100974	0.344874
BVES	131.591	0.639392	0.363628	1.75837	0.0786845	0.303364
BVES-AS1	14.4566	0.163558	0.737413	0.2218	0.82447	NA
BYSL	3303.09	0.0574666	0.102405	0.56117	0.574682	0.80464
BZRAP1-AS1	17.6783	-1.36579	0.7453	-1.83253	0.0668718	NA
BZW1	1541.61	0.164534	0.161749	1.01721	0.309052	0.6055
BZW2	4116.06	0.110168	0.0686898	1.60385	0.108746	0.358171
C10orf10	34.0959	0.139012	0.493078	0.281927	0.777999	NA
C10orf105	0.650095	3.76423	6.57519	0.57249	0.56699	NA
C10orf107	7.35728	-0.0292136	1.26673	-0.0230621	0.981601	NA
C10orf11	10.813	0.407009	1.08982	0.373464	0.708803	NA
C10orf111	3.74002	0.171683	1.40426	0.122258	0.902694	NA
C10orf12	471.985	-0.0156077	0.157289	-0.0992292	0.920956	0.968791
C10orf131	5.98742	0.248379	1.33085	0.186631	0.85195	NA
C10orf2	1827.52	-0.0650484	0.104393	-0.623111	0.533212	0.776934
C10orf25	26.7615	0.37188	0.540304	0.688279	0.491277	NA
C10orf35	139.502	-0.553003	0.241224	-2.29249	0.0218776	0.145028
C10orf54	17.5087	-1.65193	0.89868	-1.83817	0.0660375	NA
C10orf62	0.34179	-2.11496	6.63804	-0.318612	0.750021	NA
C10orf67	2.30225	3.08098	2.68937	1.14562	0.251954	NA
C10orf71	0.330074	0	6.66256	0	1	NA
C10orf76	1438.61	0.02289	0.0986631	0.232001	0.816537	0.92655
C10orf82	60.4531	-0.0958797	0.409111	-0.234361	0.814704	NA
C10orf88	431.442	-0.0034633	0.16327	-0.021212	0.983077	0.994595
C10orf91	0.994013	0.705107	4.31289	0.163488	0.870134	NA
C10orf95	19.2191	0.0267534	0.721067	0.0371025	0.970403	NA
C10orf99	0.360789	2.65837	6.59537	0.403066	0.686899	NA
C11orf1	613.418	0.0395423	0.153646	0.25736	0.796901	0.917895
C11orf16	1.55556	3.02475	2.67904	1.12904	0.258881	NA
C11orf24	2600.58	-0.10301	0.139898	-0.73632	0.461536	0.729976
C11orf31	1504.22	-0.151084	0.139002	-1.08692	0.277073	0.577532
C11orf42	0.820759	-0.431781	3.56217	-0.121213	0.903522	NA
C11orf45	87.9052	-0.734008	0.374036	-1.9624	0.049716	0.23281
C11orf49	1165.23	0.0195606	0.108094	0.180959	0.8564	0.943299
C11orf52	1.04366	-2.71851	5.58749	-0.486536	0.626587	NA
C11orf54	230.981	0.215706	0.206543	1.04436	0.296319	0.59629
C11orf57	2453.04	-0.0223054	0.122268	-0.182431	0.855244	0.943012
C11orf58	3981.69	0.193197	0.102603	1.88296	0.0597061	0.257953
C11orf63	166.61	0.522611	0.275791	1.89495	0.0580989	0.254368
C11orf65	35.7616	1.30211	0.752312	1.73081	0.0834848	NA
C11orf68	353.6	-0.170689	0.181401	-0.940947	0.346732	0.641818
C11orf70	38.6044	-0.779602	0.478974	-1.62765	0.103599	NA
C11orf71	64.2814	0.0828322	0.464318	0.178395	0.858412	NA
C11orf72	3.10991	-1.76391	1.6515	-1.06807	0.285491	NA
C11orf73	1237.56	0.0625248	0.134302	0.465554	0.641535	0.841221
C11orf74	984.994	0.092679	0.130103	0.712351	0.476247	0.739685
C11orf80	293.929	0.158805	0.18903	0.840106	0.400849	0.685131
C11orf84	5659.78	-0.249815	0.0893738	-2.79517	0.00518731	0.058643
C11orf91	0.458883	1.76586	5.4384	0.324703	0.745406	NA
C11orf94	6.11132	0.0705569	1.20334	0.0586343	0.953243	NA
C11orf95	423.323	-0.261753	0.15168	-1.72569	0.0844024	0.314564
C11orf96	19.7293	-0.628903	0.83458	-0.753555	0.451116	NA
C11orf98	3031.76	-0.0569897	0.118703	-0.480102	0.631155	0.838346
C12orf10	3576.46	0.0079585	0.0872192	0.091247	0.927296	0.971492
C12orf29	1252.47	0.187022	0.165038	1.1332	0.257129	0.556742
C12orf4	1167.08	-0.0411709	0.124806	-0.32988	0.74149	0.890931
C12orf43	2168.25	-0.0851666	0.109553	-0.777399	0.436923	0.715197
C12orf45	757.913	0.00748988	0.172393	0.0434465	0.965346	0.985295
C12orf49	774.953	0.267707	0.122529	2.18485	0.0288999	0.169878
C12orf50	1.70151	-4.73222	5.98881	-0.790177	0.429424	NA
C12orf56	1.47734	0.284313	3.85108	0.0738269	0.941148	NA
C12orf57	1391.82	0.0128005	0.110261	0.116093	0.907579	0.963434
C12orf60	78.0398	0.179286	0.402436	0.445502	0.655957	NA
C12orf65	460.508	0.319618	0.178904	1.78653	0.0740127	0.293847
C12orf66	273.576	0.19919	0.264884	0.751987	0.452059	0.724614
C12orf71	0.60336	0	6.66256	0	1	NA
C12orf73	397.969	-0.421911	0.211386	-1.99592	0.0459422	0.222338
C12orf75	375.664	-0.154534	0.173141	-0.892533	0.372107	0.662952
C12orf76	5.23691	0.409524	1.23631	0.331246	0.740459	NA
C14orf1	1748.73	-0.161615	0.124084	-1.30246	0.192759	0.479381
C14orf119	955.8	-0.0608932	0.121107	-0.502804	0.615102	0.830882
C14orf132	43.8858	-0.654602	0.46631	-1.40379	0.160381	NA
C14orf142	156.743	-0.332957	0.313719	-1.06132	0.288543	0.589463
C14orf159	188.436	-0.0048102	0.285977	-0.0168203	0.98658	0.995292
C14orf166	7110.59	0.165444	0.108279	1.52794	0.126528	0.388189
C14orf169	33.3413	0.703928	0.618665	1.13782	0.255196	NA
C14orf178	1.47737	-1.87072	2.50751	-0.746047	0.455639	NA
C14orf2	3256.21	-0.124164	0.145604	-0.852748	0.393799	0.679565
C14orf28	80.5345	0.363716	0.474796	0.766047	0.443649	NA
C14orf37	274.96	0.0854536	0.210017	0.40689	0.684089	0.86157
C14orf39	1.05688	2.34792	4.29724	0.546379	0.584805	NA
C14orf79	198.711	-0.329498	0.28004	-1.17661	0.23935	0.537698
C14orf80	715.014	-0.157932	0.121052	-1.30466	0.192008	0.478902
C14orf93	323.67	-0.0851497	0.20894	-0.407532	0.683617	0.861562
C15orf38-AP3S2	192.885	0.25322	0.271845	0.931486	0.351602	0.645917
C15orf39	6087.45	-0.558566	0.113686	-4.91324	8.95825e-07	9.03504e-05
C15orf40	684.979	-0.0434106	0.143948	-0.301572	0.762978	0.901277
C15orf41	402.639	-0.266507	0.179104	-1.488	0.136751	0.403958
C15orf48	6.48039	0.6588	1.45925	0.451465	0.651654	NA
C15orf52	5.09208	0.158814	1.54729	0.10264	0.918249	NA
C15orf57	310.79	-0.15487	0.195377	-0.792674	0.427968	0.708843
C15orf59	198.073	-0.570897	0.270698	-2.10898	0.0349463	0.188676
C15orf59-AS1	1.7182	0.275798	2.80546	0.0983077	0.921688	NA
C15orf61	673.789	-0.148625	0.147237	-1.00942	0.312771	0.609477
C15orf62	6.06614	-1.52861	1.3937	-1.0968	0.272729	NA
C15orf65	56.8403	-0.420636	0.517906	-0.812187	0.416684	NA
C16orf13	5246.35	-0.440522	0.100698	-4.37466	1.2162e-05	0.000737887
C16orf45	19.5604	0.58732	0.720946	0.814652	0.415272	NA
C16orf46	63.9479	0.705848	0.33541	2.10443	0.0353406	NA
C16orf52	100.251	0.270112	0.342242	0.789244	0.42997	0.709845
C16orf58	3200.44	-0.214771	0.153816	-1.39628	0.162629	0.439512
C16orf59	1420.59	-0.187688	0.11124	-1.68723	0.0915589	0.327504
C16orf62	1782.05	0.21055	0.0977025	2.15501	0.0311611	0.177736
C16orf70	1240.43	-0.0963129	0.137415	-0.700888	0.483373	0.745112
C16orf71	34.486	-0.693743	0.608839	-1.13945	0.254514	NA
C16orf72	1195.33	0.199461	0.123537	1.61459	0.1064	0.354037
C16orf74	16.6611	-1.05801	0.659299	-1.60475	0.108549	NA
C16orf86	16.3569	-0.623885	0.975881	-0.639304	0.522625	NA
C16orf87	586.623	-0.143778	0.161266	-0.89156	0.372629	0.663348
C16orf89	2.24838	0.86529	2.34052	0.369701	0.711606	NA
C16orf91	598.223	0.0980121	0.14687	0.667339	0.504555	0.759713
C16orf95	279.652	-0.0517426	0.181852	-0.284531	0.776003	0.908377
C16orf96	27.0472	0.396524	0.550643	0.720111	0.471457	NA
C17orf100	23.4047	0.381002	0.555397	0.686	0.492713	NA
C17orf105	0.676184	1.04191	4.82859	0.215779	0.82916	NA
C17orf107	0.494216	0	6.66256	0	1	NA
C17orf47	0.727679	2.28089	4.70541	0.484738	0.627862	NA
C17orf50	0.52304	-1.17203	5.79505	-0.202247	0.839724	NA
C17orf51	983.99	0.259903	0.104471	2.48781	0.0128534	0.105086
C17orf53	905.71	0.115451	0.139888	0.825307	0.409198	0.692107
C17orf58	236.768	0.227266	0.195253	1.16395	0.244443	0.543302
C17orf62	1616.56	0.0498193	0.0959347	0.519304	0.603549	0.825503
C17orf64	0.385151	0	6.66256	0	1	NA
C17orf67	71.3767	0.0882031	0.355894	0.247835	0.804262	NA
C17orf74	3.06266	-1.74733	1.95841	-0.892221	0.372275	NA
C17orf75	662.365	0.0336943	0.169769	0.198471	0.842676	0.937835
C17orf80	2559.34	0.104051	0.0791163	1.31516	0.188456	0.475078
C17orf82	1.85033	-3.84	3.05486	-1.25701	0.208749	NA
C17orf89	2311.69	-0.116008	0.127949	-0.906667	0.364583	0.657174
C17orf96	409.476	-0.266783	0.195561	-1.3642	0.172506	0.454736
C17orf97	174.676	-0.40114	0.225266	-1.78074	0.0749555	0.295546
C17orf98	0.959438	0	4.55121	0	1	NA
C18orf21	2773.23	-0.108768	0.102061	-1.06572	0.286552	0.587436
C18orf25	114.798	0.52968	0.321711	1.64645	0.0996718	0.343427
C18orf32	205.122	0.591845	0.260685	2.27034	0.0231869	0.149699
C18orf54	882.593	-0.0989645	0.149883	-0.660278	0.509075	0.763202
C18orf61	1.77775	-2.71764	2.11856	-1.28278	0.19957	NA
C18orf65	5.57773	0.449596	1.63265	0.275377	0.783026	NA
C18orf8	1996.67	0.105906	0.0868602	1.21927	0.222743	0.519543
C19orf12	104.689	0.328148	0.30244	1.085	0.277921	0.578117
C19orf18	0.620959	3.91771	6.57342	0.595993	0.55118	NA
C19orf24	1665.06	-0.389122	0.157075	-2.4773	0.0132379	0.107087
C19orf25	302.695	-0.611191	0.214233	-2.85292	0.00433191	0.0522528
C19orf33	1.80313	-0.349861	2.06293	-0.169594	0.865329	NA
C19orf38	27.2951	0.229509	0.742563	0.309077	0.757263	NA
C19orf43	4473.22	-0.0685207	0.116998	-0.585659	0.558105	0.792298
C19orf44	2701.03	-0.226596	0.112089	-2.02157	0.043221	0.214736
C19orf45	46.2909	-0.198836	0.461829	-0.430541	0.666802	NA
C19orf47	2167.52	-0.264768	0.12188	-2.17237	0.0298277	0.173154
C19orf48	2416.03	0.0483028	0.103653	0.466007	0.641211	0.841159
C19orf52	510.938	0.0325178	0.157425	0.206561	0.836353	0.935076
C19orf53	6676.02	-0.462695	0.122642	-3.77274	0.000161467	0.00552748
C19orf54	2395.02	-0.477693	0.130023	-3.6739	0.000238874	0.00725815
C19orf57	223.338	-0.328793	0.220454	-1.49143	0.135847	0.402379
C19orf60	918.874	-0.325136	0.14066	-2.31149	0.0208056	0.140207
C19orf66	8.5771	-1.63962	1.11856	-1.46583	0.142696	NA
C19orf67	0.539126	-2.17895	6.63457	-0.328423	0.742592	NA
C19orf68	202.024	-0.240583	0.232585	-1.03438	0.300956	0.59872
C19orf70	2777.37	-0.0771913	0.118502	-0.651394	0.514792	0.766088
C19orf71	32.2224	0.145999	0.457406	0.31919	0.749583	NA
C19orf73	8.2011	-0.145254	1.1462	-0.126727	0.899157	NA
C19orf81	98.4937	-0.123589	0.314611	-0.392833	0.694443	0.866171
C19orf84	2.23661	-1.74906	2.42101	-0.722451	0.470017	NA
C1D	225.656	-0.355811	0.174086	-2.04388	0.0409657	0.207798
C1GALT1	324.991	0.43362	0.215661	2.01066	0.0443617	0.217851
C1GALT1C1	885.729	0.0166605	0.113291	0.147059	0.883085	0.953525
C1GALT1C1L	45.9954	0.251733	0.459579	0.547747	0.583866	NA
C1orf100	1.2654	-3.74145	3.85266	-0.971134	0.331482	NA
C1orf101	16.8583	0.739256	0.945737	0.781672	0.434407	NA
C1orf106	74.9278	-0.175421	0.486214	-0.36079	0.718257	NA
C1orf109	772.197	0.258815	0.121909	2.12302	0.0337526	0.18523
C1orf111	0.35466	-2.74299	6.42562	-0.426883	0.669464	NA
C1orf112	1512.67	-0.119317	0.100784	-1.18389	0.236456	0.534347
C1orf115	88.5999	-0.342115	0.292	-1.17163	0.241347	0.539627
C1orf116	7.70798	-0.785202	1.17872	-0.666148	0.505317	NA
C1orf122	1899.32	-0.401728	0.134385	-2.98938	0.00279542	0.0394508
C1orf123	516.984	0.0610727	0.14039	0.435021	0.663547	0.853305
C1orf127	4.48173	-1.56611	2.39127	-0.654926	0.512515	NA
C1orf131	1508.73	0.00343877	0.189938	0.0181047	0.985555	0.99484
C1orf132	4.33898	-0.687898	2.29644	-0.299549	0.764521	NA
C1orf140	1.4317	0.676593	6.66256	0.101552	0.919113	NA
C1orf145	15.7718	-0.770177	1.06759	-0.721419	0.470652	NA
C1orf146	2.80756	-4.44711	6.57373	-0.676497	0.498725	NA
C1orf159	1495.8	-0.142129	0.119828	-1.18611	0.23558	0.533306
C1orf162	9.74802	1.62323	0.983434	1.65057	0.0988267	NA
C1orf167	122.578	0.0561336	0.26608	0.210966	0.832914	0.933131
C1orf168	0.92162	3.00121	4.17989	0.718012	0.47275	NA
C1orf174	423.94	0.196578	0.185181	1.06154	0.288442	0.589463
C1orf189	4.33974	-1.85081	1.56876	-1.1798	0.238081	NA
C1orf194	0.351665	-1.24674	6.66256	-0.187127	0.851561	NA
C1orf198	592.024	-0.0923442	0.143978	-0.641379	0.521277	0.769867
C1orf204	0.595773	3.94646	6.57311	0.600394	0.548243	NA
C1orf21	474.737	-0.275392	0.187139	-1.47159	0.141131	0.409725
C1orf216	105.086	0.282265	0.272792	1.03473	0.300797	0.59872
C1orf220	26.3386	-0.285317	0.59471	-0.479759	0.631399	NA
C1orf226	137.885	-0.527648	0.275314	-1.91653	0.0552979	0.247459
C1orf228	3.17204	4.40544	2.11298	2.08494	0.0370746	NA
C1orf229	3.75127	-1.18868	1.68807	-0.704164	0.481331	NA
C1orf233	155.266	-0.228212	0.328549	-0.694605	0.487303	0.748
C1orf234	5.57965	-0.153212	1.38328	-0.11076	0.911807	NA
C1orf27	760.877	0.310255	0.14049	2.20838	0.0272178	0.16461
C1orf35	1487.22	-0.0431954	0.128747	-0.335506	0.737243	0.888839
C1orf43	7105.38	0.20898	0.0778167	2.68555	0.00724116	0.0726792
C1orf50	556.292	0.00651612	0.139399	0.0467444	0.962717	0.984621
C1orf52	1976.78	-0.178969	0.0884245	-2.02397	0.0429731	0.214065
C1orf53	125.716	-0.66546	0.395228	-1.68374	0.0922325	0.328007
C1orf54	17.1303	-0.633667	0.616493	-1.02786	0.304017	NA
C1orf56	445.033	-0.321848	0.158962	-2.02468	0.0428998	0.213822
C1orf61	26.4374	-0.796638	0.579335	-1.37509	0.169104	NA
C1orf64	0.531844	3.94648	6.57311	0.600397	0.548241	NA
C1orf74	214.006	0.191837	0.243058	0.789264	0.429958	0.709845
C1orf94	0.389415	0	6.66256	0	1	NA
C1QA	0.558312	0	6.66256	0	1	NA
C1QB	1.20277	0.676483	6.66256	0.101535	0.919126	NA
C1QBP	22801.1	0.128362	0.0848913	1.51208	0.130514	0.394318
C1QC	0.585641	2.33366	6.60485	0.353325	0.723845	NA
C1QL1	123.464	-0.569801	0.301674	-1.8888	0.0589186	0.256118
C1QL2	0.706577	-0.816606	5.63389	-0.144945	0.884754	NA
C1QL3	0.59194	-2.76444	6.60903	-0.418282	0.675741	NA
C1QL4	34.0889	-1.45275	0.484067	-3.00113	0.00268982	NA
C1QTNF1	77.9435	-0.378632	0.45472	-0.832671	0.40503	NA
C1QTNF2	6.55886	0.741704	1.47263	0.503658	0.614501	NA
C1QTNF3	0.850698	1.68989	4.24563	0.398031	0.690607	NA
C1QTNF3-AMACR	431.82	-0.160935	0.161919	-0.993921	0.320261	0.616245
C1QTNF4	4.47367	1.22998	1.79367	0.685734	0.492881	NA
C1QTNF6	40.6539	0.527599	0.620977	0.849627	0.395532	NA
C1QTNF9	1.13668	-0.327371	2.65935	-0.123102	0.902026	NA
C1QTNF9B	82.1912	0.128459	0.403443	0.318408	0.750176	0.894849
C1QTNF9B-AS1	11.4229	-0.0903045	0.753105	-0.119909	0.904555	NA
C1R	122.656	0.0582637	0.288249	0.20213	0.839815	0.936563
C1RL	9.62245	0.51199	1.09275	0.468534	0.639403	NA
C1RL-AS1	2.22854	1.31406	2.14909	0.611447	0.540904	NA
C1S	12.5323	0.558193	1.13906	0.490046	0.624101	NA
C2	29.665	0.785066	0.620086	1.26606	0.205492	NA
C2-AS1	1.19783	0.0100647	2.776	0.00362562	0.997107	NA
C20orf144	2.05423	1.9991	1.73306	1.15351	0.2487	NA
C20orf166-AS1	3.14997	1.63504	1.88677	0.866582	0.386171	NA
C20orf194	294.755	0.0533244	0.169999	0.313675	0.753768	0.896928
C20orf196	67.6352	0.507933	0.356308	1.42555	0.153999	NA
C20orf24	3675.07	0.00818823	0.0946893	0.0864747	0.931089	0.972663
C20orf27	6701.32	-0.259157	0.103568	-2.50228	0.0123397	0.102421
C20orf96	283.898	-0.0394705	0.222207	-0.177629	0.859014	0.943783
C21orf140	3.37256	1.26612	1.72915	0.732223	0.464032	NA
C21orf2	520.374	-0.00245374	0.13643	-0.0179853	0.985651	0.99484
C21orf33	1513.67	0.1205	0.0893816	1.34816	0.177608	0.461316
C21orf58	377.583	-0.0206981	0.212446	-0.0974278	0.922387	0.969479
C21orf59	3666.28	-0.0524368	0.110272	-0.475523	0.634414	0.839564
C21orf62-AS1	12.6032	-0.344057	0.859576	-0.400263	0.688963	NA
C21orf91	407.095	0.277096	0.20178	1.37326	0.169672	0.450737
C21orf91-OT1	13.9575	-0.204394	0.898686	-0.227437	0.820084	NA
C22orf15	6.32543	0.623604	1.25016	0.498821	0.617906	NA
C22orf23	79.6435	-0.0365855	0.378765	-0.0965914	0.923051	NA
C22orf24	26.8892	-0.777156	0.629928	-1.23372	0.217306	NA
C22orf29	511.416	0.139844	0.153727	0.90969	0.362986	0.655417
C22orf34	0.520387	2.82737	6.59121	0.428961	0.667952	NA
C22orf39	578.878	-0.442365	0.194614	-2.27303	0.0230244	0.148889
C22orf46	355.605	0.121164	0.169326	0.715567	0.474259	0.738748
C2CD2L	1946.02	0.0511055	0.109212	0.467946	0.639823	0.840812
C2CD3	2407.61	0.172188	0.0945228	1.82165	0.0685078	0.280768
C2CD4A	12.1822	0.41554	1.03828	0.400221	0.688994	NA
C2CD4C	25.257	-0.756159	0.535148	-1.41299	0.157658	NA
C2CD5	1469.89	0.312345	0.116087	2.69062	0.00713201	0.0719867
C2orf15	21.8837	0.696609	0.753457	0.924551	0.3552	NA
C2orf16	41.6193	0.810394	0.6256	1.29539	0.195187	NA
C2orf27A	10.9766	0.274895	0.863716	0.31827	0.75028	NA
C2orf27B	6.54294	0.261382	1.17601	0.222261	0.824111	NA
C2orf42	621.519	-0.0731642	0.198395	-0.368781	0.712291	0.877352
C2orf47	931.087	0.0452352	0.139198	0.324971	0.745203	0.893053
C2orf48	25.0107	0.534891	0.597608	0.895053	0.370759	NA
C2orf49	454.85	-0.0598055	0.19383	-0.308546	0.757667	0.898382
C2orf50	1.8781	2.24102	3.50016	0.640263	0.522002	NA
C2orf61	0.487449	1.73873	6.59429	0.263672	0.792032	NA
C2orf66	4.04503	-1.49685	1.53024	-0.978182	0.327984	NA
C2orf68	411.224	0.0901217	0.157121	0.57358	0.566252	0.79739
C2orf69	222.682	-0.0916437	0.271751	-0.337234	0.735941	0.88817
C2orf72	16.7302	1.24602	0.637517	1.95449	0.0506435	NA
C2orf73	0.800117	2.20065	5.11138	0.43054	0.666803	NA
C2orf74	217.788	0.364544	0.296832	1.22812	0.219403	0.514713
C2orf76	394.205	-0.256939	0.183307	-1.40168	0.16101	0.437203
C2orf78	2.42892	0	6.66256	0	1	NA
C2orf81	155.301	0.0842245	0.204512	0.411831	0.680463	0.860439
C2orf82	22.2264	-0.103389	0.895195	-0.115493	0.908054	NA
C2orf88	3.81829	-0.916335	1.82969	-0.500816	0.616501	NA
C3	28.4873	-0.00785652	0.917697	-0.00856112	0.993169	NA
C3AR1	1.43314	-1.57781	3.65292	-0.431932	0.665791	NA
C3orf14	738.08	0.0074626	0.169674	0.0439821	0.964919	0.985194
C3orf18	34.5637	0.422128	0.505454	0.835145	0.403636	NA
C3orf20	4.77821	-1.10555	1.83215	-0.603415	0.546232	NA
C3orf22	0.676163	0	5.84504	0	1	NA
C3orf33	103.269	0.281211	0.337381	0.833512	0.404556	0.688071
C3orf35	2.73247	1.69911	2.12106	0.801067	0.423093	NA
C3orf38	704.745	0.186091	0.161064	1.15539	0.247932	0.545696
C3orf49	0.898159	-2.17581	3.93804	-0.552512	0.580598	NA
C3orf52	151.615	-0.0284467	0.264574	-0.107519	0.914377	0.966138
C3orf58	267.286	-0.0101912	0.220307	-0.046259	0.963104	0.984704
C3orf62	66.7881	0.0400806	0.353484	0.113387	0.909723	NA
C3orf67	237.288	-0.0805678	0.230299	-0.34984	0.726459	0.883022
C3orf70	17.3743	-0.41928	0.675886	-0.620342	0.535033	NA
C3orf80	13.1298	-0.0520587	0.742961	-0.0700693	0.944139	NA
C4A	46.4763	0.461962	0.414206	1.1153	0.264723	NA
C4B	25.6301	0.766511	0.548885	1.39649	0.162568	NA
C4orf19	6.78678	0.477341	1.14701	0.41616	0.677293	NA
C4orf22	2.8667	-2.06981	2.6797	-0.772403	0.439876	NA
C4orf26	0.858684	1.69336	4.91298	0.34467	0.730343	NA
C4orf3	391.501	-0.485398	0.172726	-2.81022	0.00495076	0.0569148
C4orf32	187.285	-0.172569	0.302535	-0.570409	0.5684	0.799387
C4orf33	223.406	0.27501	0.269545	1.02027	0.307598	0.604067
C4orf36	6.22413	1.39079	1.34877	1.03115	0.30247	NA
C4orf46	1172.1	0.0514347	0.11282	0.4559	0.648462	0.844727
C4orf47	9.66923	-0.589849	1.14187	-0.516562	0.605462	NA
C4orf48	1565.55	-0.457247	0.15805	-2.89305	0.00381524	0.0479984
C4orf50	1.38197	4.31066	4.10343	1.0505	0.293488	NA
C5	44.194	0.589851	0.587665	1.00372	0.315514	NA
C5AR1	10.8945	-0.336534	1.03587	-0.324881	0.745271	NA
C5orf15	4500.89	-0.309217	0.115569	-2.67561	0.00745924	0.0739272
C5orf22	2186.73	0.0944451	0.0890999	1.05999	0.289149	0.590276
C5orf24	602.944	0.137851	0.131574	1.0477	0.294775	0.595303
C5orf30	127.788	0.155286	0.267392	0.580744	0.561413	0.7938
C5orf34	638.478	0.291947	0.16427	1.77724	0.0755294	0.296521
C5orf42	1569.13	0.186592	0.135115	1.38099	0.167283	0.447855
C5orf45	513.915	0.0187067	0.165611	0.112955	0.910066	0.964469
C5orf49	2.60152	1.08893	1.94741	0.559166	0.576048	NA
C5orf51	1699.27	0.0597842	0.122694	0.487261	0.626073	0.836297
C5orf56	9.16255	0.29803	1.0013	0.297644	0.765975	NA
C5orf60	3.19248	-3.05849	1.97883	-1.5456	0.122201	NA
C5orf63	182.645	0.0646618	0.239402	0.270097	0.787085	0.913509
C5orf64	0.353986	-1.24673	6.66256	-0.187125	0.851563	NA
C5orf66	841.803	0.403055	0.141437	2.84971	0.00437596	0.0526131
C5orf66-AS1	0.58121	0	6.66256	0	1	NA
C6orf1	594.764	-0.425426	0.157391	-2.70298	0.00687205	0.0704709
C6orf106	1175.13	0.266144	0.120347	2.21146	0.0270039	0.16404
C6orf118	7.52763	0.201885	1.48663	0.135801	0.891979	NA
C6orf120	518.23	-0.16907	0.135616	-1.24668	0.212514	0.50628
C6orf132	4.00292	-1.9188	1.89368	-1.01326	0.310935	NA
C6orf136	1422.52	-0.54597	0.157644	-3.46331	0.000533579	0.0131499
C6orf141	5.34813	-0.527192	1.10781	-0.475886	0.634156	NA
C6orf163	7.86995	-0.319277	1.31689	-0.242447	0.808434	NA
C6orf201	155.594	0.628027	0.262644	2.39117	0.0167947	0.123436
C6orf203	298.803	0.12543	0.210171	0.596801	0.55064	0.787698
C6orf222	0.30536	0	6.66256	0	1	NA
C6orf223	1.08651	-0.285014	2.92212	-0.0975367	0.9223	NA
C6orf226	67.3161	-0.867114	0.436814	-1.98508	0.0471351	NA
C6orf229	0.571584	-2.47443	5.55996	-0.445045	0.656287	NA
C6orf25	0.433718	-2.17899	6.63457	-0.32843	0.742586	NA
C6orf47	310.517	0.07775	0.199019	0.390667	0.696043	0.867218
C6orf48	207.009	0.0538555	0.301963	0.178352	0.858447	0.943624
C6orf52	61.9887	0.047442	0.513952	0.0923082	0.926453	NA
C6orf58	0.486197	2.53278	6.59879	0.383825	0.701108	NA
C6orf62	1307.55	0.244095	0.129152	1.88999	0.058759	0.25572
C6orf89	1659.75	0.300978	0.104992	2.86669	0.00414792	0.0509009
C6orf99	8.66915	-0.523006	1.13901	-0.459178	0.646106	NA
C7orf13	57.4409	-0.0539267	0.43812	-0.123087	0.902039	NA
C7orf25	344.856	0.0489794	0.179971	0.272151	0.785506	0.912568
C7orf26	1546.34	-0.23452	0.10572	-2.21831	0.0265335	0.162755
C7orf31	616.448	-0.0653497	0.130033	-0.502562	0.615272	0.83091
C7orf43	806.884	-0.144978	0.213138	-0.680206	0.496374	0.75368
C7orf49	665.415	0.295879	0.143649	2.05974	0.0394235	0.203423
C7orf50	4526.01	-0.20412	0.0828726	-2.46306	0.0137758	0.109466
C7orf55	788.307	-0.219272	0.163546	-1.34074	0.180005	0.464018
C7orf55-LUC7L2	385.184	-0.200156	0.224638	-0.891015	0.372921	0.663376
C7orf57	22.6959	-0.471347	0.915251	-0.514992	0.606558	NA
C7orf61	5.07312	-0.788082	1.4101	-0.558883	0.576242	NA
C7orf73	1127.73	-0.00827772	0.15255	-0.0542622	0.956726	0.981589
C8G	9.30403	-0.25015	0.981949	-0.254748	0.798918	NA
C8orf31	67.3923	-0.295466	0.33921	-0.871041	0.383732	NA
C8orf33	6835.93	-0.201527	0.11632	-1.73253	0.0831796	0.31248
C8orf34	61.9259	-0.188788	0.651033	-0.289983	0.771829	NA
C8orf34-AS1	16.9974	-0.578151	0.929334	-0.622113	0.533868	NA
C8orf37	30.9278	0.99787	0.743293	1.3425	0.179434	NA
C8orf37-AS1	2.56496	-3.89803	2.23998	-1.74021	0.0818227	NA
C8orf4	0.998857	2.77005	4.74754	0.583472	0.559576	NA
C8orf44	30.3537	-0.369045	0.526429	-0.701034	0.483282	NA
[truncated: 21,293 more rows]

## Sheet: AA263yne DESEQ
	baseMean	log2FoldChange	lfcSE	stat	pvalue	padj
44623	216.705	-0.096013	0.244861	-0.392112	0.694976	0.843962
44625	860.854	0.488789	0.146763	3.33047	0.00086701	0.0160636
44626	3705.79	0.0867809	0.119499	0.726206	0.467712	0.694824
44627	2921.05	0.19968	0.0798318	2.50126	0.0123751	0.0887783
44628	1760.55	0.00697146	0.112649	0.0618863	0.950653	0.978765
44629	602.08	-0.142867	0.122027	-1.17078	0.241686	0.485502
44630	1.46882	0	6.66256	0	1	NA
44631	0.711392	0	6.28437	0	1	NA
44805	153.747	-0.668085	0.233672	-2.85908	0.00424875	0.0450075
44806	6610.27	0.225172	0.0808007	2.78676	0.00532381	0.0514878
44807	518.602	-0.470255	0.144179	-3.26162	0.00110779	0.0189939
44808	74.7131	-0.0351732	0.372434	-0.0944414	0.924759	NA
44809	177.005	-1.06673	0.562362	-1.89688	0.0578444	0.214148
44810	4049.93	-0.15782	0.0862916	-1.82891	0.0674128	0.233301
44811	2670.02	0.224682	0.128664	1.74627	0.0807641	0.258833
44812	4593.93	0.0586721	0.0691156	0.848897	0.395938	0.636984
44813	3935.42	-0.388718	0.0923641	-4.20854	2.5702e-05	0.00131266
44814	1735.17	-0.00886318	0.0838934	-0.105648	0.915862	0.9622
44815	2600.46	0.166376	0.12665	1.31367	0.188958	0.424059
44816	0.689219	-0.278354	4.23206	-0.0657728	0.947559	NA
44819	2593.1	0.113689	0.087535	1.29879	0.194017	0.431091
2024-03-01	2892.14	-0.0635472	0.0973186	-0.652981	0.513768	0.728723
2024-03-02	553.106	-0.0917466	0.143707	-0.638427	0.523196	0.73517
A1BG	127.5	-0.0934611	0.278872	-0.33514	0.737519	0.86807
A1BG-AS1	406.196	0.0166549	0.185554	0.0897581	0.928479	0.968336
A1CF	0.81528	-1.09028	3.91461	-0.278515	0.780617	NA
A2M	1.25754	1.80459	3.31079	0.545062	0.585711	NA
A2M-AS1	6.57286	-2.1323	1.32109	-1.61404	0.106518	NA
A2ML1	2.9918	4.52122	2.54606	1.77577	0.0757702	NA
A3GALT2	0.743035	-1.86296	5.2186	-0.356984	0.721104	NA
A4GALT	106.179	-1.02638	0.342199	-2.99937	0.00270536	0.0340353
AAAS	7812	-0.482857	0.132962	-3.63155	0.000281724	0.00724036
AACS	910.536	-0.241544	0.130909	-1.84513	0.0650189	0.228925
AADAT	832.51	-0.110296	0.169228	-0.651762	0.514555	0.729297
AAED1	427.266	0.115667	0.24373	0.474572	0.635092	0.810978
AAGAB	2767.85	0.245155	0.117464	2.08706	0.0368832	0.165925
AAK1	970.758	-0.392484	0.16644	-2.3581	0.0183686	0.111682
AAMDC	359.153	0.469855	0.251997	1.86453	0.0622476	0.223548
AAMP	6160.86	-0.000808231	0.0754813	-0.0107077	0.991457	0.995937
AANAT	20.9592	-0.547129	0.643658	-0.85003	0.395308	NA
AAR2	2087.23	-0.0548588	0.118126	-0.464407	0.642356	0.816418
AARD	27.8188	-0.496992	0.597345	-0.832002	0.405408	NA
AARS	11915.5	0.293337	0.0629568	4.65933	3.17242e-06	0.000250496
AARS2	2541.73	0.177035	0.0904937	1.95632	0.0504274	0.197594
AARSD1	730.605	0.140286	0.242879	0.577598	0.563536	0.760805
AASDH	733.106	0.167242	0.122915	1.36063	0.173631	0.404251
AASDHPPT	1600.48	0.150157	0.124441	1.20665	0.227566	0.470256
AASS	1704.52	0.261185	0.0904082	2.88895	0.00386533	0.0426746
AATBC	11.109	-0.159954	1.06789	-0.149786	0.880934	NA
AATF	6218.88	0.0813289	0.0860573	0.945055	0.344631	0.591063
AATK	108.628	-0.861087	0.382257	-2.25264	0.0242821	0.131638
AATK-AS1	1.52106	0.968331	3.6164	0.267761	0.788883	NA
ABALON	269.203	-0.14195	0.197653	-0.718177	0.472648	0.697924
ABAT	127.204	0.167621	0.34916	0.48007	0.631177	0.808538
ABCA1	31.1131	0.0707144	0.718897	0.0983652	0.921642	NA
ABCA10	2.74106	1.04162	2.55399	0.407841	0.68339	NA
ABCA12	2.37843	2.13856	2.45902	0.869683	0.384474	NA
ABCA13	0.782513	-5.04921	6.56657	-0.768927	0.441937	NA
ABCA2	1954.14	-0.344621	0.12189	-2.82731	0.00469414	0.0478826
ABCA3	1474.02	-0.105578	0.131737	-0.801427	0.422885	0.659532
ABCA4	1.33244	2.53548	4.18023	0.60654	0.544156	NA
ABCA5	277.55	0.256897	0.293167	0.876281	0.380877	0.623041
ABCA7	549.239	0.00644162	0.176763	0.0364422	0.97093	0.986882
ABCA8	1.5363	-0.4776	3.59677	-0.132786	0.894363	NA
ABCA9	0.442613	2.79976	6.5979	0.424341	0.671317	NA
ABCB1	408.392	0.167632	0.151217	1.10855	0.267624	0.511329
ABCB10	2294.9	0.174799	0.0984818	1.77493	0.0759088	0.249879
ABCB4	15.1103	1.05069	0.87298	1.20357	0.228756	NA
ABCB5	0.331853	-1.88044	6.63702	-0.283326	0.776927	NA
ABCB6	539.592	0.281483	0.153639	1.8321	0.0669366	0.232323
ABCB7	1465.92	0.0363506	0.109658	0.331491	0.740273	0.870244
ABCB8	1875.68	-0.168068	0.133411	-1.25977	0.207751	0.447333
ABCB9	463.712	-0.0257257	0.181427	-0.141797	0.88724	0.951292
ABCC1	2602.25	0.222567	0.124668	1.78528	0.0742166	0.246507
ABCC10	1329.22	0.141871	0.1201	1.18128	0.237493	0.480754
ABCC11	21.161	0.436235	0.757456	0.575922	0.564668	NA
ABCC2	25.5475	0.240403	0.652012	0.368709	0.712344	NA
ABCC3	1.55478	3.9908	3.58361	1.11362	0.265441	NA
ABCC4	974.346	0.22171	0.161887	1.36954	0.170832	0.400074
ABCC5	1882.78	0.0620143	0.138638	0.447312	0.65465	0.822948
ABCC6	56.6895	-0.76409	0.448223	-1.70471	0.0882487	NA
ABCC8	77.1685	-0.161023	0.373136	-0.431539	0.666077	NA
ABCC9	3.74861	-5.57051	2.54461	-2.18914	0.0285869	NA
ABCD1	1675.27	-0.299723	0.117404	-2.55291	0.0106828	0.0805371
ABCD2	18.597	0.127527	0.807675	0.157894	0.87454	NA
ABCD3	2294.14	0.204774	0.0952776	2.14923	0.0316158	0.152759
ABCD4	1502.89	0.0410814	0.118111	0.347819	0.727976	0.861728
ABCE1	2908.78	0.379372	0.0846586	4.48119	7.42263e-06	0.000490987
ABCF1	9721.71	0.151114	0.0759088	1.99074	0.0465098	0.188935
ABCF2	7394.31	0.210484	0.0777272	2.70799	0.00676924	0.0599147
ABCF3	1417.1	0.0517471	0.1009	0.512857	0.608051	0.79123
ABCG1	100.737	-0.365478	0.304003	-1.20222	0.229279	0.471927
ABCG2	93.832	-0.0338455	0.372219	-0.0909288	0.927549	0.96817
ABCG4	37.5396	0.0596264	0.65193	0.0914614	0.927126	NA
ABCG5	4.83082	-0.161999	1.5156	-0.106888	0.914878	NA
ABCG8	1.53085	1.84077	3.10146	0.593516	0.552836	NA
ABHD1	27.9783	-0.672371	0.668425	-1.0059	0.314462	NA
ABHD10	2415.35	0.105579	0.0895776	1.17863	0.238545	0.482145
ABHD11	1158.52	-0.19434	0.148337	-1.31013	0.190153	0.425548
ABHD11-AS1	1.25562	-3.90226	3.31477	-1.17723	0.239103	NA
ABHD12	1048.26	0.16079	0.0976046	1.64736	0.0994847	0.293298
ABHD12B	9.81121	1.44106	0.949312	1.518	0.129013	NA
ABHD13	169.779	-0.235071	0.232381	-1.01158	0.31174	0.558989
ABHD14A	915.214	-0.346205	0.163474	-2.1178	0.0341923	0.15863
ABHD14A-ACY1	787.191	-0.0908035	0.13057	-0.695438	0.486781	0.709367
ABHD14B	508.873	-0.29613	0.136497	-2.16949	0.0300454	0.148589
ABHD15	335.753	-0.367415	0.184011	-1.99671	0.0458571	0.188165
ABHD16A	668.306	0.0081543	0.151919	0.0536752	0.957194	0.981565
ABHD16B	79.7218	-0.586645	0.32726	-1.7926	0.0730372	NA
ABHD17A	3064.48	-0.21469	0.0858598	-2.50048	0.0124027	0.0889228
ABHD17B	330.642	0.00714767	0.213149	0.0335337	0.973249	0.988068
ABHD17C	182.549	-0.167784	0.255187	-0.657495	0.510862	0.72654
ABHD18	261.278	0.0762861	0.22598	0.337578	0.735681	0.867147
ABHD2	934.112	0.320004	0.117272	2.72872	0.00635803	0.0577315
ABHD3	935.672	0.373401	0.128425	2.90755	0.00364276	0.041052
ABHD4	935.197	-0.340708	0.161146	-2.11428	0.0344911	0.159462
ABHD5	795.069	0.138184	0.118818	1.16299	0.244833	0.487689
ABHD6	400.765	0.147712	0.187518	0.787724	0.430858	0.666559
ABHD8	182.719	-0.222271	0.248292	-0.895198	0.370681	0.614602
ABI1	3058.7	-0.248745	0.127208	-1.95541	0.0505344	0.197755
ABI2	3873.52	-0.0862402	0.0823817	-1.04684	0.295175	0.54153
ABI3	3.26944	-0.993799	2.80095	-0.354808	0.722733	NA
ABI3BP	20.5232	-0.615886	0.696986	-0.883641	0.37689	NA
ABL1	2730.17	0.0865935	0.091361	0.947817	0.343222	0.589742
ABL2	925.402	0.306151	0.185223	1.65288	0.0983552	0.291328
ABLIM1	1192.19	-0.193517	0.163498	-1.1836	0.23657	0.48018
ABLIM2	31.5554	0.876313	0.510929	1.71514	0.0863203	NA
ABLIM3	29.3737	-0.476181	0.559871	-0.85052	0.395036	NA
ABR	2527.87	-0.278732	0.0921478	-3.02484	0.00248769	0.0322084
ABRACL	380.837	-0.273852	0.166684	-1.64294	0.100396	0.294562
ABT1	2424.52	-0.00202723	0.0927356	-0.0218604	0.982559	0.992476
ABTB1	154.033	-0.223994	0.386472	-0.579587	0.562193	0.760276
ABTB2	732.619	-0.408282	0.139594	-2.92478	0.00344698	0.0395513
ACAA1	1424.6	0.161653	0.104573	1.54584	0.122144	0.330079
ACAA2	941.51	0.0689336	0.104309	0.660861	0.508701	0.725217
ACACA	5020	0.242126	0.103494	2.33952	0.0193086	0.11478
ACACB	781.072	0.13274	0.191734	0.692316	0.488739	0.710581
ACAD10	452.74	-0.30765	0.162189	-1.89686	0.0578459	0.214148
ACAD11	171.242	1.3918	0.712486	1.95344	0.0507678	0.198152
ACAD8	475.488	0.158413	0.195557	0.810061	0.417905	0.654618
ACAD9	2252.6	0.166731	0.0830636	2.00727	0.0447208	0.18568
ACADL	68.4909	0.354593	0.587856	0.603198	0.546377	NA
ACADM	2123.17	0.181114	0.127246	1.42333	0.15464	0.378078
ACADS	255.32	-0.23193	0.209196	-1.10867	0.267572	0.511329
ACADSB	491.476	0.28471	0.143038	1.99046	0.0465407	0.188935
ACADVL	1886.12	0.0844531	0.134397	0.628387	0.52975	0.738365
ACAN	27.5867	-2.11694	0.734119	-2.88364	0.00393108	NA
ACAP1	350.735	-0.13281	0.20373	-0.651895	0.514469	0.729262
ACAP2	504.961	0.452716	0.204023	2.21895	0.0264903	0.138113
ACAP3	580.174	0.0547455	0.188764	0.29002	0.771801	0.889149
ACAT1	5021.71	0.261902	0.127619	2.05223	0.0401476	0.174243
ACAT2	4028.27	0.113608	0.1052	1.07992	0.280176	0.525746
ACBD3	2084.18	0.260371	0.127294	2.04544	0.0408119	0.175753
ACBD4	87.1747	-0.116824	0.346897	-0.336769	0.736291	0.867304
ACBD5	372.106	0.159365	0.133592	1.19292	0.2329	0.476277
ACBD6	2568.97	-0.0391035	0.0921311	-0.424433	0.67125	0.831751
ACBD7	27.7233	-0.686967	0.624776	-1.09954	0.271532	NA
ACCS	69.3079	-0.291165	0.425344	-0.684541	0.493634	NA
ACCSL	0.589036	-3.44558	6.58461	-0.523278	0.600781	NA
ACD	2388.75	-0.294438	0.161708	-1.82079	0.0686381	0.235917
ACE	73.9251	-0.594812	0.38299	-1.55308	0.120405	NA
ACE2	21.8967	1.16744	0.862001	1.35433	0.17563	NA
ACER2	173.538	-0.436021	0.294077	-1.48268	0.13816	0.355578
ACER3	1121.62	0.134336	0.10457	1.28466	0.198912	0.436762
ACHE	98.748	-0.270245	0.397302	-0.680201	0.496377	0.716048
ACIN1	17704.8	-0.0531828	0.0739065	-0.719596	0.471774	0.697147
ACKR2	1.58321	-1.86644	3.33104	-0.560318	0.575263	NA
ACKR3	1.84463	0.357834	3.01685	0.118612	0.905583	NA
ACKR4	5.77473	0.691396	1.50651	0.458938	0.646279	NA
ACLY	25612.2	-0.0274002	0.0663719	-0.412828	0.679733	0.836476
ACMSD	1.20573	-3.89774	3.34355	-1.16575	0.243715	NA
ACO1	3008.95	0.107051	0.104314	1.02623	0.304782	0.551151
ACO2	10191.2	0.0898281	0.0744352	1.20679	0.227511	0.470224
ACOT1	267.979	-0.197939	0.179093	-1.10523	0.269062	0.513302
ACOT11	44.7985	-0.349248	0.546045	-0.639596	0.522436	NA
ACOT13	681.296	0.294925	0.221364	1.33231	0.182759	0.417072
ACOT2	961.943	-0.128147	0.1092	-1.17351	0.24059	0.48418
ACOT4	1.37319	-1.79611	2.46198	-0.729538	0.465672	NA
ACOT6	1.41163	0.375142	2.64331	0.141922	0.887142	NA
ACOT7	4506.64	-0.13009	0.0944346	-1.37756	0.168339	0.396701
ACOT8	1321.93	-0.0128935	0.13077	-0.0985962	0.921459	0.965376
ACOT9	756.543	0.179324	0.15853	1.13116	0.257986	0.501596
ACOX1	785.432	-0.0281381	0.115419	-0.24379	0.807393	0.909891
ACOX2	2.92913	-4.33696	2.63597	-1.6453	0.0999085	NA
ACOX3	499.734	0.227954	0.181141	1.25843	0.208235	0.447665
ACOXL	11.0723	-0.173258	1.01791	-0.170209	0.864845	NA
ACP1	4471.32	0.107403	0.0629652	1.70575	0.0880552	0.272342
ACP2	2733.64	0.0320139	0.0853549	0.375068	0.70761	0.849635
ACP5	1.19277	-1.92251	3.84597	-0.499877	0.617162	NA
ACP6	1239.9	-0.00572532	0.0960579	-0.0596028	0.952472	0.979821
ACPP	3.24768	0.070679	1.92648	0.0366882	0.970734	NA
ACPT	2.98381	-0.155497	1.75449	-0.088628	0.929378	NA
ACR	7.58673	-0.86438	0.909644	-0.95024	0.34199	NA
ACRBP	5.11996	-2.73352	1.5113	-1.80872	0.070494	NA
ACRC	35.5915	-1.02553	0.682026	-1.50365	0.132671	NA
ACRV1	3.92639	0.225793	1.50634	0.149895	0.880847	NA
ACSBG1	6.28769	0.937629	1.56875	0.597691	0.550046	NA
ACSBG2	2.92482	2.8063	2.2091	1.27034	0.203965	NA
ACSF2	399.991	0.0263976	0.166486	0.158558	0.874017	0.945256
ACSF3	1355.18	-0.0143727	0.139105	-0.103322	0.917707	0.963016
ACSL1	624.605	0.151329	0.172381	0.877875	0.380011	0.622308
ACSL3	6695.34	0.298976	0.0719033	4.15803	3.20999e-05	0.00155348
ACSL4	1318.14	0.198155	0.145352	1.36327	0.172797	0.403366
ACSL5	1.8167	3.15916	2.84916	1.10881	0.267514	NA
ACSL6	82.2368	0.0785156	0.471115	0.166659	0.867638	0.941281
ACSM2A	0.373194	0	6.66256	0	1	NA
ACSM3	137.826	-0.475054	0.336787	-1.41055	0.158378	0.382543
ACSM6	0.555643	0	6.66256	0	1	NA
ACSS1	673.761	-0.158566	0.12031	-1.31799	0.187508	0.422759
ACSS2	664.065	-0.148934	0.136245	-1.09313	0.274336	0.518925
ACSS3	219.894	0.450308	0.307112	1.46627	0.142575	0.361773
ACTA1	24.41	-0.307415	0.807267	-0.380809	0.703345	NA
ACTA2	75.4087	-0.604093	0.350082	-1.72557	0.084424	NA
ACTA2-AS1	42.8778	-0.653578	0.444424	-1.47062	0.141395	NA
ACTB	65714.1	-0.278115	0.105072	-2.6469	0.00812337	0.0675653
ACTBL2	0.518054	-3.44557	6.58461	-0.523276	0.600782	NA
ACTC1	1.28822	-2.54837	3.30474	-0.771127	0.440632	NA
ACTG1	158868	-0.15721	0.110318	-1.42506	0.15414	0.377858
ACTG2	75.949	0.10725	0.346094	0.309887	0.756647	NA
ACTL10	0.483867	-0.993759	6.66256	-0.149156	0.881431	NA
ACTL6A	2201.1	0.168272	0.103551	1.62501	0.10416	0.301163
ACTL6B	10.142	-3.15927	1.18467	-2.66679	0.00765801	NA
ACTL7A	0.574088	-1.86191	6.63803	-0.280491	0.779101	NA
ACTL7B	0.351295	-1.9259	6.63457	-0.290282	0.7716	NA
ACTL8	45.8292	0.831389	0.375232	2.21567	0.0267144	NA
ACTN1	7398.76	-0.171902	0.0842338	-2.04078	0.041273	0.176977
ACTN2	167.734	0.453469	0.24872	1.82321	0.0682721	0.235314
ACTN3	2.256	1.80656	2.16236	0.835458	0.40346	NA
ACTN4	18743.7	-0.00406195	0.0863398	-0.0470461	0.962476	0.983401
ACTR10	1462.96	0.0180721	0.103047	0.175377	0.860784	0.936887
ACTR1A	3273.89	0.123179	0.118065	1.04331	0.296803	0.543105
ACTR1B	567.672	0.0334881	0.181624	0.184381	0.853714	0.932922
ACTR2	3898.13	0.199177	0.106698	1.86673	0.0619388	0.222972
ACTR3	7122.64	0.0618393	0.0853368	0.72465	0.468667	0.695643
ACTR3B	1317.93	-0.181041	0.0907439	-1.99507	0.0460351	0.188211
ACTR3C	137.822	0.614658	0.246945	2.48904	0.0128087	0.0906964
ACTR5	703.75	-0.084096	0.144944	-0.580197	0.561782	0.760147
ACTR6	951.097	-0.0747689	0.140938	-0.530508	0.59576	0.784071
ACTR8	1674.36	0.0264434	0.105831	0.249863	0.802693	0.906807
ACTRT3	97.0939	0.569042	0.359192	1.58423	0.113142	0.315357
ACVR1	210.2	-0.18042	0.216482	-0.833416	0.40461	0.643878
ACVR1B	555.312	0.27735	0.159074	1.74353	0.0812412	0.259807
ACVR1C	25.1234	0.552529	0.686722	0.80459	0.421056	NA
ACVR2A	287.486	0.374807	0.215894	1.73607	0.0825509	0.262574
ACVR2B	396.36	0.314084	0.237989	1.31974	0.186921	0.422314
ACVR2B-AS1	70.3332	-0.228212	0.353489	-0.6456	0.518538	NA
ACVRL1	4.98809	-0.539501	1.73376	-0.311174	0.755668	NA
ACY1	1.21839	3.4226	6.57108	0.520857	0.602466	NA
ACYP1	180.576	-0.347468	0.241191	-1.44063	0.149688	0.371958
ACYP2	133.842	0.145555	0.299335	0.486261	0.626782	0.805508
ADA	762.87	0.00755297	0.162565	0.0464613	0.962943	0.983579
ADAL	305.443	0.158589	0.195033	0.813141	0.416137	0.653207
ADAM10	1184.96	0.317413	0.143957	2.20491	0.0274603	0.140941
ADAM11	511.528	-0.486434	0.155277	-3.13268	0.00173217	0.0256443
ADAM12	6.46691	0.179071	1.59991	0.111925	0.910883	NA
ADAM15	3677.45	-0.186486	0.0967327	-1.92785	0.0538735	0.206021
ADAM17	950.396	0.572747	0.116649	4.90998	9.10835e-07	8.88767e-05
ADAM19	206.429	-0.150403	0.242705	-0.619696	0.535458	0.741669
ADAM20	0.403167	0	6.66256	0	1	NA
ADAM21	6.50821	-0.635476	1.38865	-0.45762	0.647225	NA
ADAM22	226.938	0.311905	0.224637	1.38849	0.164989	0.391808
ADAM23	459.036	0.13803	0.190729	0.723696	0.469253	0.695992
ADAM28	0.467819	0	6.66256	0	1	NA
ADAM29	0.298558	3.38456	6.58451	0.514019	0.607238	NA
ADAM32	2.6858	-0.330083	2.21563	-0.148979	0.88157	NA
ADAM8	67.5968	-0.551688	0.431563	-1.27835	0.201126	NA
ADAM9	3463.41	0.169826	0.0891065	1.90588	0.0566658	0.212065
ADAMTS1	2578.89	0.350412	0.125201	2.7988	0.00512931	0.050502
ADAMTS10	57.74	-0.731374	0.602074	-1.21476	0.224459	NA
ADAMTS12	3.55123	-4.9573	2.44378	-2.02853	0.0425058	NA
ADAMTS13	181.635	-0.490591	0.378502	-1.29614	0.194928	0.431886
ADAMTS14	1.56684	-3.87277	3.08073	-1.2571	0.208718	NA
ADAMTS15	292.053	-0.421678	0.207692	-2.0303	0.0423259	0.179711
ADAMTS16	0.388376	0	6.66256	0	1	NA
ADAMTS17	269.688	0.400255	0.207999	1.92431	0.0543152	0.206884
ADAMTS18	3.99059	-2.45388	2.37998	-1.03105	0.302517	NA
ADAMTS19	125.215	0.0493225	0.303367	0.162583	0.870846	0.943227
ADAMTS19-AS1	23.9237	-0.827739	0.710862	-1.16442	0.244255	NA
ADAMTS2	258.762	-0.147164	0.289164	-0.50893	0.610802	0.793381
ADAMTS20	69.7042	0.722754	0.482522	1.49787	0.134168	NA
ADAMTS3	224.801	-0.479225	0.299747	-1.59877	0.109872	0.310578
ADAMTS4	4.69868	0.66112	2.04696	0.322976	0.746714	NA
ADAMTS5	10.4883	0.767502	1.18166	0.649511	0.516008	NA
ADAMTS6	35.2926	0.708453	0.514056	1.37816	0.168153	NA
ADAMTS7	98.1792	-0.265449	0.311881	-0.851121	0.394702	0.636038
ADAMTS8	31.7325	-1.12509	0.909454	-1.2371	0.216048	NA
ADAMTS9	342.244	-0.0106305	0.188088	-0.0565188	0.954928	0.980583
ADAMTS9-AS1	3.5684	0.531113	1.43679	0.369652	0.711642	NA
ADAMTS9-AS2	1.173	-0.993806	6.66256	-0.149163	0.881425	NA
ADAMTSL1	1.50429	-2.86332	3.53187	-0.810708	0.417533	NA
ADAMTSL3	26.838	0.700723	0.693234	1.0108	0.312111	NA
ADAMTSL4	58.8498	0.0365378	0.45708	0.0799373	0.936287	NA
ADAMTSL4-AS1	0.685272	1.80166	4.85969	0.370734	0.710835	NA
ADAMTSL5	63.8254	-0.357358	0.3994	-0.894736	0.370928	NA
ADAP1	258.795	-0.522062	0.242053	-2.15681	0.0310203	0.15112
ADAP2	145.112	-0.374991	0.26239	-1.42913	0.152966	0.37635
ADAR	8483.42	0.034706	0.11613	0.298853	0.765052	0.886052
ADARB1	1178.04	0.228675	0.110642	2.0668	0.0387527	0.170933
ADAT1	478.258	0.422162	0.189088	2.23262	0.025574	0.135454
ADAT2	204.978	0.251808	0.247093	1.01908	0.308165	0.55492
ADAT3	671.186	-0.309396	0.206293	-1.49979	0.133669	0.348781
ADCK1	992.283	0.0384102	0.149871	0.256289	0.797728	0.903878
ADCK2	1349.9	0.0413032	0.118778	0.347735	0.728039	0.861728
ADCK3	3440.61	0.0156199	0.0641179	0.243612	0.807531	0.909961
ADCK4	819.328	-0.00755333	0.110312	-0.0684726	0.945409	0.976432
ADCK5	153.916	-0.693389	0.391046	-1.77316	0.0762015	0.250293
ADCY1	756.507	-0.0361996	0.170337	-0.212518	0.831703	0.921733
ADCY10	4.52732	1.99977	1.52929	1.30764	0.190995	NA
ADCY2	0.68818	0.929592	6.66256	0.139525	0.889035	NA
ADCY3	1908.36	-0.0422785	0.115142	-0.367185	0.713481	0.853333
ADCY5	54.53	-0.515351	0.47163	-1.0927	0.274525	NA
ADCY6	1571.96	0.0216486	0.155836	0.138919	0.889514	0.952359
ADCY7	106.455	-0.5664	0.366852	-1.54395	0.122602	0.330815
ADCY8	0.285061	-1.88043	6.63702	-0.283324	0.776928	NA
ADCY9	1546.79	0.0111145	0.107389	0.103498	0.917568	0.963016
ADCYAP1R1	85.8649	-0.446162	0.42013	-1.06196	0.288253	0.534323
ADD1	4429.46	-0.004421	0.0849661	-0.0520325	0.958503	0.981732
ADD2	1484.45	-0.170946	0.104831	-1.63068	0.102959	0.298877
ADD3	1408.04	0.17447	0.184472	0.94578	0.344261	0.590851
ADD3-AS1	131.536	-0.20814	0.316934	-0.656729	0.511355	0.72665
ADGRA1	1.11437	-0.0448079	3.76748	-0.0118933	0.990511	NA
ADGRA2	619.992	-0.222555	0.130672	-1.70315	0.0885392	0.272894
ADGRA3	1859.29	0.15681	0.0901557	1.73933	0.081977	0.261464
ADGRB1	169.015	-0.483374	0.277971	-1.73893	0.0820463	0.261615
ADGRB2	689.98	-0.388893	0.162161	-2.3982	0.0164761	0.105276
ADGRB3	145.765	-0.0394149	0.281151	-0.140191	0.888509	0.951963
ADGRD1	2.27835	3.2028	3.37973	0.947649	0.343308	NA
ADGRD2	1.19456	-3.52684	3.58492	-0.983798	0.325215	NA
ADGRE1	3.45172	0.598159	2.5599	0.233665	0.815245	NA
ADGRE2	21.7814	-0.429548	0.740809	-0.579836	0.562025	NA
ADGRE5	514.45	-0.190409	0.195092	-0.975999	0.329065	0.576392
ADGRF3	61.6578	-0.0528605	0.415443	-0.127239	0.898751	NA
ADGRF4	0.773508	4.16038	5.55581	0.748835	0.453957	NA
ADGRG1	1.93906	-2.36095	2.55313	-0.924729	0.355107	NA
ADGRG2	44.1668	0.227168	0.562453	0.403887	0.686296	NA
ADGRG3	1.62428	-0.265388	3.60398	-0.0736373	0.941299	NA
ADGRG6	89.0848	-0.00584885	0.493852	-0.0118433	0.990551	0.995609
ADGRL1	3121.58	-0.276873	0.129191	-2.14312	0.0321033	0.154122
ADGRL2	5581.87	0.161558	0.071616	2.25589	0.0240775	0.130878
ADGRL3	462.117	0.0627166	0.200279	0.313146	0.75417	0.878381
ADGRL3-AS1	14.8336	0.349583	0.908353	0.384853	0.700346	NA
ADGRV1	463.703	0.290975	0.197042	1.47672	0.139751	0.357525
ADH5	2698.08	0.079097	0.127115	0.622247	0.53378	0.740528
ADH6	3.35748	-2.46982	1.99997	-1.23493	0.216857	NA
ADHFE1	8.12552	-0.537167	0.921481	-0.582939	0.559934	NA
ADI1	4849.79	0.266368	0.139556	1.90868	0.0563038	0.211059
ADIPOR1	5541.81	0.0375345	0.082262	0.45628	0.648189	0.820008
ADIPOR2	1279.52	0.345937	0.155765	2.22088	0.026359	0.137986
ADK	1362.98	0.244173	0.105971	2.30415	0.0212141	0.121962
ADM	58.8812	-0.0514251	0.427354	-0.120334	0.904219	NA
ADM2	36.0687	0.167229	0.640878	0.260937	0.794141	NA
ADM5	106.565	0.329265	0.28499	1.15535	0.247945	0.491387
ADNP	3875.4	0.0125579	0.0818288	0.153465	0.878031	0.947195
ADNP-AS1	34.3196	-0.854951	0.562074	-1.52106	0.128244	NA
ADNP2	2142.06	0.0967056	0.117277	0.824594	0.409602	0.647793
ADO	652.025	-0.0310022	0.155307	-0.199618	0.841779	0.926793
ADORA1	66.9747	-0.147975	0.491308	-0.301186	0.763273	NA
ADORA2A-AS1	6.70258	1.42572	1.13571	1.25536	0.20935	NA
ADORA2B	603.669	-0.173269	0.151574	-1.14313	0.252984	0.496279
ADPGK	2555.09	0.0564762	0.0778481	0.725466	0.468166	0.695326
ADPGK-AS1	74.2467	0.940546	0.533563	1.76276	0.0779402	NA
ADPRH	6.13769	-0.0815743	1.56258	-0.0522048	0.958366	NA
ADPRHL1	79.2421	0.402221	0.317449	1.26704	0.20514	NA
ADPRHL2	854.936	0.00841706	0.126111	0.0667432	0.946786	0.977093
ADPRM	133.225	-0.0254878	0.268948	-0.0947685	0.924499	0.966368
ADRA1A	2.72906	-5.14408	2.87202	-1.7911	0.0732771	NA
ADRA1B	10.3114	0.541538	1.0576	0.512044	0.60862	NA
ADRA1D	0.496788	0.630243	6.3917	0.0986034	0.921453	NA
ADRA2A	2.87177	-1.93865	2.20941	-0.877452	0.380241	NA
ADRA2B	0.953448	-4.33414	5.24572	-0.826225	0.408677	NA
ADRA2C	495.218	-0.46593	0.214043	-2.17681	0.0294949	0.14707
ADRB1	12.6647	0.441251	0.857348	0.51467	0.606784	NA
ADRB2	50.3741	-0.962204	0.471895	-2.03902	0.041448	NA
ADRM1	13675.2	-0.241212	0.0948295	-2.54363	0.0109706	0.0819347
ADSL	7822.46	-0.0904944	0.0671871	-1.3469	0.178012	0.410393
ADSS	1925.58	0.221687	0.104423	2.12297	0.0337565	0.157951
ADSSL1	51.0037	-0.34357	0.409876	-0.838229	0.401902	NA
AEBP1	3.25441	0.251549	1.47641	0.170379	0.864712	NA
AEBP2	749.29	0.283476	0.132695	2.1363	0.0326549	0.155561
AEN	941.845	0.135605	0.115534	1.17373	0.240505	0.48418
AES	1359.56	-0.67224	0.168705	-3.9847	6.75651e-05	0.00265874
AFAP1	355.364	0.0972069	0.205865	0.472187	0.636794	0.812458
AFAP1-AS1	57.4297	-0.110816	0.587942	-0.188482	0.850499	NA
AFAP1L1	327.192	0.156123	0.204768	0.762437	0.445799	0.67642
AFAP1L2	33.1906	-0.498118	0.627701	-0.793559	0.427452	NA
AFF1	965.038	-0.0927039	0.202918	-0.456855	0.647775	0.819884
AFF2	689.203	-0.316269	0.152029	-2.08032	0.0374963	0.167484
AFF3	275.554	-0.576097	0.215836	-2.66915	0.00760443	0.0650451
AFF4	1911.96	0.215019	0.240968	0.892314	0.372225	0.615774
AFG3L2	2919.38	0.351018	0.0999376	3.51237	0.000444128	0.0100196
AFMID	644.564	-0.078987	0.162245	-0.486838	0.626373	0.805241
AFP	4.42898	0	6.66256	0	NA	NA
AFTPH	1179.14	0.0177904	0.0990003	0.179701	0.857387	0.93502
AGA	530.7	0.325844	0.228719	1.42465	0.154259	0.377993
AGAP1	1507.7	-0.237936	0.130784	-1.8193	0.0688656	0.236416
AGAP1-IT1	2.30849	2.72126	2.56	1.063	0.287784	NA
AGAP11	41.8698	-0.0238156	0.611178	-0.0389667	0.968917	NA
AGAP2	74.0513	-0.800818	0.430171	-1.86163	0.0626555	NA
AGAP2-AS1	445.811	-0.67245	0.22917	-2.93429	0.0033431	0.0388052
AGAP3	6108.19	-0.554888	0.126333	-4.39228	1.1217e-05	0.000676513
AGAP4	239.555	0.0553542	0.278764	0.19857	0.842599	0.927254
AGAP5	184.444	-0.112444	0.325854	-0.345075	0.730038	0.862988
AGAP6	741.931	-0.101131	0.236868	-0.426952	0.669414	0.830639
AGAP9	537.589	-0.00723775	0.228416	-0.0316867	0.974722	0.989217
AGBL2	0.351121	0	6.66256	0	1	NA
AGBL3	58.7682	0.401663	0.361358	1.11154	0.266336	NA
AGBL4	10.724	-0.556247	1.07802	-0.515992	0.60586	NA
AGBL5	6023.24	-0.177055	0.0990496	-1.78754	0.0738507	0.245937
AGBL5-AS1	0.713762	-0.110254	4.70394	-0.0234387	0.9813	NA
AGER	279.36	-0.366754	0.216915	-1.69077	0.0908798	0.277396
AGFG1	3679.02	0.183183	0.0759621	2.41151	0.0158866	0.103121
AGFG2	584.235	-0.0850621	0.186102	-0.457073	0.647618	0.819884
AGGF1	1686.12	0.123201	0.128052	0.962121	0.335989	0.582989
AGK	2100.84	0.249905	0.116994	2.13605	0.0326753	0.155561
AGL	2495.44	0.0969344	0.16041	0.60429	0.545651	0.748702
AGMAT	65.5489	0.291261	0.575158	0.506401	0.612575	NA
AGMO	3.82843	0.923491	2.36127	0.391099	0.695724	NA
AGO1	1288.5	-0.0935422	0.11409	-0.819901	0.412273	0.650125
AGO2	1947.68	0.102382	0.119483	0.856871	0.391516	0.632859
AGO3	513.317	0.377992	0.175276	2.15656	0.0310403	0.151126
AGO4	447.758	0.22693	0.166428	1.36353	0.172715	0.403293
AGPAT1	2363.58	0.235263	0.113734	2.06854	0.0385893	0.170463
AGPAT2	2113.52	-0.155504	0.113891	-1.36537	0.172136	0.402332
AGPAT3	715.983	0.331961	0.166843	1.98967	0.0466278	0.188999
AGPAT4	849.075	0.388048	0.159616	2.43113	0.0150518	0.0999818
AGPAT4-IT1	20.853	-0.262112	0.954478	-0.274613	0.783613	NA
AGPAT5	579.059	0.341828	0.155013	2.20516	0.0274432	0.140941
AGPS	2959.27	0.238085	0.0951834	2.50133	0.0123729	0.0887783
AGR2	0.522746	2.4788	6.6079	0.375127	0.707566	NA
AGRN	2233.15	-0.0600286	0.105353	-0.569785	0.568824	0.765361
AGT	0.983711	0.385232	3.46338	0.11123	0.911434	NA
AGTPBP1	2480.67	0.18418	0.0915919	2.01088	0.0443385	0.184967
AGTR1	44.8645	-0.548724	0.509291	-1.07743	0.281289	NA
AGTRAP	954.945	-0.0367551	0.151165	-0.243146	0.807893	0.91027
AHCTF1	1719.8	0.413719	0.122818	3.36856	0.000755633	0.0145338
AHCY	13602.1	-0.0519726	0.0863022	-0.602217	0.54703	0.749729
AHCYL1	7040.96	-0.0364323	0.0695322	-0.523964	0.600304	0.786383
AHCYL2	280.315	0.159194	0.227641	0.69932	0.484352	0.70746
AHDC1	1203.86	-0.404214	0.142014	-2.84629	0.00442324	0.046284
AHI1	1107.79	0.0893856	0.144037	0.620575	0.534879	0.741295
AHNAK	1176.74	0.0483766	0.191936	0.252045	0.801006	0.905684
AHNAK2	201.162	-0.23585	0.242117	-0.974117	0.329998	0.577342
AHR	458.352	0.0518606	0.220986	0.234679	0.814458	0.91271
AHRR	463.881	-0.139845	0.21033	-0.664884	0.506125	0.72307
AHSA1	8736.44	0.109991	0.0819997	1.34135	0.179805	0.413098
AHSA2	90.2957	0.0191574	0.394571	0.0485525	0.961276	0.98298
AHSG	0.54043	1.80041	6.6379	0.271232	0.786212	NA
AIDA	1117.46	0.199632	0.0943496	2.11588	0.0343551	0.159078
AIF1	0.492029	-3.44559	6.58461	-0.523279	0.60078	NA
AIF1L	2148.96	-0.307283	0.100093	-3.06998	0.0021407	0.0290098
AIFM1	6771.29	0.12888	0.0782095	1.64788	0.0993769	0.293111
AIFM2	82.2687	-0.346198	0.460148	-0.752361	0.451834	0.68221
AIFM3	3.59496	-2.70758	1.85627	-1.45861	0.144673	NA
AIG1	1675.71	0.171691	0.0923837	1.85846	0.0631042	0.225684
AIM1	27.8917	-0.287866	0.56992	-0.505098	0.61349	NA
AIM1L	43.2113	-0.352016	0.603237	-0.583545	0.559526	NA
AIMP1	1261.5	0.151681	0.133564	1.13564	0.256106	0.499712
AIMP2	5573.54	0.0471941	0.0829454	0.568978	0.569371	0.76567
AIP	2050.68	-0.0459793	0.106958	-0.429882	0.667282	0.829575
AJUBA	435.778	-0.0418372	0.273218	-0.153128	0.878298	0.94728
AK1	2521.65	-0.450183	0.120276	-3.74291	0.000181902	0.00521107
AK2	15119.9	0.0241389	0.0525768	0.459116	0.646151	0.818666
AK3	696.618	0.0549067	0.131926	0.416193	0.677269	0.835243
AK4	63.7509	-0.686122	0.325693	-2.10665	0.0351477	NA
AK5	45.6969	-1.0025	0.577837	-1.73492	0.0827548	NA
AK6	1354.71	0.0992807	0.132879	0.747153	0.454971	0.685054
AK7	30.3378	0.0914189	0.676688	0.135098	0.892535	NA
AK8	61.4648	-0.604676	0.450076	-1.3435	0.179111	NA
AK9	106.757	-0.133961	0.384886	-0.348054	0.727799	0.861728
AKAP1	5952.58	-0.112399	0.0687161	-1.6357	0.101901	0.296922
AKAP10	792.263	0.054013	0.137741	0.392133	0.69496	0.843962
AKAP11	1269.51	0.09934	0.151808	0.654379	0.512868	0.728087
AKAP12	3050.07	0.0917239	0.127533	0.719214	0.472009	0.697409
AKAP13	1409.26	0.184606	0.135313	1.36428	0.172478	0.402818
AKAP14	0.858316	-1.92562	6.00988	-0.320409	0.748658	NA
AKAP17A	2667.89	0.599271	0.123912	4.83627	1.32295e-06	0.000121207
AKAP2	706.877	0.0866717	0.150192	0.577072	0.563891	0.760945
AKAP3	70.2475	0.151341	0.431226	0.350955	0.725622	NA
AKAP5	83.6912	-0.414271	0.283569	-1.46092	0.144037	0.363944
AKAP6	93.6055	0.0500794	0.480245	0.104279	0.916948	0.962915
AKAP7	377.884	-0.11433	0.179865	-0.635646	0.525008	0.736328
AKAP8	2277.36	-0.0548893	0.0661314	-0.830004	0.406537	0.645745
AKAP8L	2931.89	0.201012	0.106151	1.89364	0.0582727	0.215395
AKAP9	1744.57	0.281335	0.166173	1.69302	0.090451	0.276584
AKIP1	556.615	-0.146889	0.126251	-1.16347	0.244639	0.487689
AKIRIN1	1745.97	0.0406477	0.139351	0.291692	0.770522	0.888523
AKIRIN2	1736.67	-0.163099	0.104982	-1.55358	0.120284	0.327729
AKNA	506.346	-0.705917	0.217279	-3.2489	0.00115851	0.0195128
AKNAD1	0.623015	-0.0480824	6.50526	-0.0073913	0.994103	NA
AKR1A1	1782.57	0.0695136	0.112323	0.618871	0.536001	0.741908
AKR1B1	7422.36	-0.0496434	0.0709402	-0.699792	0.484057	0.707233
AKR1C1	6.81435	-1.74497	1.33047	-1.31155	0.189672	NA
AKR1C2	11.3939	-0.133233	1.14638	-0.116221	0.907477	NA
AKR1C3	3.27484	-2.94318	2.20468	-1.33497	0.181886	NA
AKR7A2	2842.46	-0.123176	0.097968	-1.25731	0.20864	0.448071
AKR7A3	20.8022	0.538543	0.845068	0.637278	0.523944	NA
AKT1	3871.26	0.0552586	0.105939	0.521608	0.601943	0.787315
AKT1S1	3794.78	-0.372914	0.133342	-2.79668	0.00516311	0.0506331
AKT2	4746.84	-0.288413	0.104564	-2.75823	0.00581152	0.0547487
AKT3	668.596	-0.0698406	0.171575	-0.407055	0.683968	0.838335
AKTIP	116.152	0.206035	0.260296	0.791541	0.428628	0.664822
ALAD	424.407	-0.209731	0.14978	-1.40026	0.161435	0.386657
ALAS1	3219.21	0.00786009	0.0824715	0.0953067	0.924071	0.966119
ALB	1.30042	0	3.85398	0	1	NA
ALCAM	1125	0.132625	0.110867	1.19625	0.231598	0.474832
ALDH16A1	1426.35	-0.225313	0.132829	-1.69627	0.0898356	0.275281
ALDH18A1	7605.34	0.135363	0.0790604	1.71215	0.0868688	0.270174
ALDH1A1	4.49864	-2.06448	1.62602	-1.26965	0.204209	NA
ALDH1A2	1157.61	0.0245509	0.154119	0.159299	0.873433	0.945256
ALDH1A3	29.9884	0.127105	0.70385	0.180585	0.856693	NA
ALDH1B1	3548.19	-0.38908	0.0957577	-4.06317	4.84111e-05	0.00207511
ALDH1L1	13.3658	-0.813139	0.972089	-0.836486	0.402882	NA
ALDH1L1-AS2	1.12712	0.61126	3.46294	0.176515	0.85989	NA
ALDH1L2	2538.65	0.493866	0.117858	4.19034	2.78532e-05	0.00139872
ALDH2	2736.41	-0.124086	0.094393	-1.31457	0.188656	0.423908
ALDH3A1	44.5102	-0.535176	0.60145	-0.88981	0.373568	NA
ALDH3A2	2248.31	0.0092988	0.103343	0.0899798	0.928303	0.968336
ALDH3B1	6.6839	0.324303	1.24935	0.259578	0.79519	NA
ALDH3B2	0.577398	-4.4644	6.571	-0.67941	0.496878	NA
ALDH4A1	990.886	0.124639	0.134174	0.928936	0.352922	0.598442
ALDH5A1	587.239	0.0449633	0.170072	0.264378	0.791489	0.900719
ALDH6A1	583.727	0.218763	0.171772	1.27357	0.202817	0.44138
ALDH7A1	1442.9	0.274203	0.113345	2.41919	0.0155549	0.101628
ALDH8A1	17.7853	-0.476698	0.885641	-0.538252	0.590403	NA
ALDH9A1	3087.8	0.145777	0.0992365	1.46899	0.141836	0.360508
ALDOA	75838	-0.0406671	0.0892328	-0.455742	0.648576	0.820044
ALDOB	1.13301	-0.0319748	3.21742	-0.00993803	0.992071	NA
ALDOC	555.347	-0.370081	0.194461	-1.90312	0.0570251	0.212948
ALG1	2256.47	0.182088	0.0760827	2.39329	0.0166978	0.10603
ALG10	186.438	0.326869	0.234139	1.39605	0.162699	0.388368
ALG10B	122.995	-0.240556	0.302011	-0.796513	0.425734	0.662044
ALG11	392.595	0.513147	0.168319	3.04865	0.00229869	0.0306884
ALG12	1738.24	0.296634	0.116945	2.53653	0.0111957	0.0830471
ALG13	4546.04	-0.0605979	0.0944818	-0.641371	0.521282	0.734149
ALG14	1157.38	-0.152713	0.134809	-1.13281	0.257294	0.500898
ALG1L	54.1279	0.00258637	0.393514	0.0065725	0.994756	NA
ALG1L2	11.4435	-2.43805	0.919781	-2.65068	0.00803293	NA
ALG2	1812.38	0.578576	0.0887994	6.51554	7.24278e-11	1.73856e-08
ALG3	5545.68	-0.231703	0.137446	-1.68577	0.0918406	0.279092
ALG5	1885.86	0.0139812	0.118998	0.117491	0.906471	0.958569
ALG6	1776.83	0.167702	0.109071	1.53756	0.124157	0.332991
ALG8	4559.28	0.282047	0.0729164	3.86809	0.000109692	0.00364689
ALG9	765.183	0.202987	0.136474	1.48736	0.136919	0.354007
ALK	0.895111	0	6.56791	0	1	NA
ALKBH1	1109.77	0.0724854	0.110641	0.65514	0.512378	0.727618
ALKBH2	418.168	0.0258143	0.183589	0.140609	0.888179	0.951778
ALKBH3	917.742	0.13599	0.129044	1.05383	0.291962	0.538352
ALKBH3-AS1	2.97129	0.569448	1.78577	0.318882	0.749816	NA
ALKBH4	732.284	-0.0495719	0.149928	-0.330638	0.740918	0.870376
ALKBH5	1515.59	0.136863	0.10041	1.36304	0.172869	0.403366
ALKBH6	615.635	0.00543711	0.129588	0.0419569	0.966533	0.984851
ALKBH7	1032.95	-0.352171	0.140132	-2.51314	0.0119662	0.0868306
ALKBH8	1058.49	0.194405	0.129995	1.49548	0.134788	0.350765
ALLC	0.331581	0.929666	6.66256	0.139536	0.889027	NA
ALMS1	2882.29	0.139148	0.0931051	1.49453	0.135038	0.351262
ALMS1-IT1	18.4448	0.014704	0.787358	0.0186751	0.9851	NA
ALOX12	52.5858	-0.725927	0.403291	-1.80001	0.0718592	NA
ALOX12-AS1	35.7368	-1.14837	0.525898	-2.18364	0.0289884	NA
ALOX12B	5.77298	-1.41736	1.48534	-0.954235	0.339965	NA
ALOX15	0.836875	-2.46549	5.59378	-0.440755	0.65939	NA
ALOX15B	7.94614	-0.985626	1.29706	-0.759891	0.44732	NA
ALOX5	13.8312	-0.897959	1.04505	-0.859248	0.390204	NA
ALOXE3	66.2444	-0.558024	0.560536	-0.995518	0.319484	NA
ALPK1	167.697	0.518148	0.242245	2.13894	0.0324402	0.154995
ALPK2	5.06855	-0.624648	1.97932	-0.315588	0.752316	NA
ALPK3	9.00429	1.10286	1.02949	1.07127	0.284049	NA
ALPL	173.944	-0.0373464	0.266979	-0.139885	0.888751	0.952136
ALPPL2	0.452831	0	6.66256	0	1	NA
ALS2	1553.03	0.276495	0.100447	2.75265	0.00591151	0.0554778
ALS2CL	27.7222	-0.27505	0.704401	-0.390473	0.696187	NA
ALS2CR11	1.41551	3.25434	3.95309	0.82324	0.410372	NA
ALS2CR12	7.03391	0.309642	1.40449	0.220466	0.825508	NA
ALX1	419.263	-0.344154	0.209084	-1.64601	0.0997622	0.293611
ALX3	31.0976	-0.0826447	0.524544	-0.157555	0.874807	NA
ALX4	394.109	-0.643532	0.192033	-3.35116	0.000804747	0.0152214
ALYREF	9589.35	0.0261071	0.127654	0.204514	0.837952	0.925031
AMACR	56.1107	-0.812682	0.399907	-2.03218	0.0421356	NA
AMBN	39.1885	-0.712641	0.64314	-1.10807	0.267833	NA
AMBRA1	3346.61	-0.14189	0.0960345	-1.47749	0.139544	0.357394
AMD1	8771.04	0.353994	0.123448	2.86755	0.00413665	0.0444875
AMDHD1	10.6252	-0.183241	1.29226	-0.141799	0.887239	NA
AMDHD2	742.436	-0.358441	0.134713	-2.66077	0.00779622	0.0658019
AMELX	0.76005	-2.88003	6.59749	-0.436535	0.662449	NA
AMER1	685.513	-0.135703	0.154246	-0.879784	0.378976	0.621856
AMER2	2.83599	1.0107	1.76628	0.57222	0.567173	NA
AMFR	2240.53	0.323591	0.091559	3.53424	0.000408953	0.00949371
AMH	347.551	-0.162046	0.249645	-0.649106	0.51627	0.730641
AMHR2	151.651	-0.42068	0.318804	-1.31956	0.186983	0.422314
AMIGO1	202.899	-0.503113	0.217998	-2.30787	0.0210061	0.121326
AMIGO2	25.6848	-0.654851	0.698955	-0.9369	0.34881	NA
AMIGO3	451.57	0.451668	0.17987	2.51108	0.0120363	0.0869565
AMMECR1	574.773	-0.287208	0.185406	-1.54908	0.121363	0.329175
AMMECR1L	838.35	0.12397	0.171077	0.724646	0.468669	0.695643
AMN	2.49197	-1.24378	1.5748	-0.7898	0.429645	NA
AMN1	322.708	0.0107492	0.210073	0.0511689	0.959191	0.981768
AMOT	23773.4	-0.194697	0.115164	-1.6906	0.0909137	0.277396
AMOTL1	2591.12	0.0528628	0.11788	0.448445	0.653832	0.822799
AMOTL2	679.737	0.198219	0.16206	1.22312	0.221284	0.463743
AMPD1	5.88848	0.365195	2.1789	0.167605	0.866894	NA
AMPD2	3920.56	-0.25107	0.110138	-2.27959	0.0226317	0.126445
AMPD3	20.9266	-1.52539	0.92792	-1.64388	0.1002	NA
AMPH	480.07	-0.307132	0.149068	-2.06034	0.0393656	0.172119
AMT	13.6128	-1.46998	1.11684	-1.31619	0.188109	NA
AMY1A	1.36985	1.84203	2.6809	0.687095	0.492023	NA
AMY1B	1.51029	-1.32647	2.85946	-0.463887	0.642729	NA
AMY2A	3.34519	-3.22079	2.22026	-1.45064	0.146881	NA
AMY2B	11.6469	1.05737	1.01639	1.04032	0.298192	NA
AMZ1	0.997694	-0.0296587	4.10883	-0.00721829	0.994241	NA
AMZ2	5648.69	-0.236142	0.0809945	-2.91554	0.00355078	0.0403948
ANAPC1	5736.32	0.161766	0.0766391	2.11075	0.0347934	0.160179
ANAPC10	646.234	-0.141788	0.150011	-0.945179	0.344567	0.591052
ANAPC11	1102.12	0.0141418	0.131648	0.107421	0.914455	0.961502
ANAPC13	410.126	0.0525279	0.171377	0.306504	0.759221	0.881851
ANAPC15	1497.73	-0.219159	0.123348	-1.77675	0.0756099	0.249305
ANAPC16	1692.5	-0.0556137	0.11329	-0.490896	0.6235	0.803095
ANAPC2	2344.97	-0.17794	0.0891649	-1.99563	0.0459747	0.188211
ANAPC4	877.752	0.130804	0.134542	0.972219	0.330941	0.577655
ANAPC5	7420.43	0.0543431	0.075514	0.719643	0.471745	0.697147
ANAPC7	4369.46	-0.113422	0.0740586	-1.53152	0.125641	0.335322
ANG	31.2755	-0.191543	0.543408	-0.352485	0.724475	NA
ANGEL1	1107.45	-0.0932248	0.14742	-0.632378	0.52714	0.737037
ANGEL2	1176.29	0.225896	0.125069	1.80617	0.0708914	0.24035
ANGPT1	14.2639	0.006309	0.704123	0.00896007	0.992851	NA
ANGPT2	3.05542	0.288842	2.57619	0.11212	0.910728	NA
ANGPT4	0.511079	-4.83352	6.568	-0.73592	0.46178	NA
ANGPTL1	1.31773	-0.960254	3.69556	-0.25984	0.794987	NA
ANGPTL2	1.90432	-0.0437472	2.54236	-0.0172073	0.986271	NA
ANGPTL3	0.787785	-1.92495	5.19792	-0.370331	0.711136	NA
ANGPTL4	3.92244	-1.40381	1.72002	-0.816159	0.414409	NA
ANGPTL6	15.6839	0.131759	0.852931	0.154478	0.877233	NA
ANGPTL7	0.359186	-2.48068	6.61013	-0.375284	0.707449	NA
ANGPTL8	2.88385	-2.25906	1.81004	-1.24807	0.212004	NA
ANK1	87.2851	0.0672741	0.328106	0.205038	0.837543	0.925031
ANK2	659.135	0.279718	0.141786	1.97282	0.0485165	0.193697
ANK3	904.954	0.00334552	0.127138	0.0263142	0.979007	0.991481
ANKAR	71.8541	-1.05262	0.486362	-2.16426	0.0304441	NA
ANKDD1A	13.8995	-0.126164	0.842808	-0.149695	0.881005	NA
ANKDD1B	0.573894	0.030153	6.11438	0.0049315	0.996065	NA
ANKEF1	211.954	0.37521	0.267381	1.40328	0.160533	0.385574
ANKFN1	6.87968	1.14627	1.48541	0.771688	0.440299	NA
ANKFY1	4923.18	0.295065	0.0712587	4.14076	3.46158e-05	0.00164865
ANKH	839.229	0.0137917	0.155903	0.0884637	0.929508	0.96882
ANKHD1	1646.87	0.192973	0.307521	0.627514	0.530323	0.738369
ANKHD1-EIF4EBP3	7173.95	-0.0706348	0.0845371	-0.835548	0.403409	0.642734
ANKIB1	1146.76	0.194422	0.143311	1.35665	0.174894	0.406325
ANKK1	1.23106	-4.19015	6.57378	-0.637404	0.523862	NA
ANKLE1	44.0192	0.467673	0.554461	0.843473	0.398964	NA
ANKLE2	5050.17	0.167515	0.0761396	2.2001	0.0277999	0.141917
ANKMY1	244.281	-0.1576	0.226124	-0.696962	0.485827	0.708954
ANKMY2	390.688	0.369907	0.178616	2.07097	0.038362	0.170028
ANKRA2	209.357	-0.368921	0.279121	-1.32173	0.186259	0.421312
ANKRD1	9.2737	1.65987	0.984002	1.68685	0.0916317	NA
ANKRD10	436.73	0.180622	0.189521	0.953046	0.340567	0.586945
ANKRD11	6153.14	0.380085	0.0873859	4.3495	1.36446e-05	0.000783552
ANKRD12	486.929	0.134108	0.228604	0.586639	0.557447	0.757183
ANKRD13A	1057.92	0.220015	0.127979	1.71914	0.0855881	0.267982
ANKRD13B	1619.59	-0.467368	0.131957	-3.54181	0.000397386	0.00933352
ANKRD13C	1824	0.0347544	0.105283	0.330104	0.741322	0.870496
ANKRD13D	698.524	-0.0233581	0.175056	-0.133432	0.893852	0.953685
ANKRD16	320.749	-0.0991147	0.172909	-0.573217	0.566498	0.763344
ANKRD17	10061.3	0.153989	0.102445	1.50313	0.132806	0.347338
ANKRD18A	270.427	0.212836	0.242324	0.878311	0.379775	0.622175
ANKRD18B	428.407	-0.0761102	0.153932	-0.49444	0.620995	0.800987
ANKRD2	1.4562	0	6.66256	0	1	NA
ANKRD20A1	13.0029	0.832548	0.813331	1.02363	0.306012	NA
ANKRD20A2	10.7581	0.6448	0.89053	0.724063	0.469027	NA
ANKRD20A3	11.255	-0.235857	0.855023	-0.275848	0.782665	NA
ANKRD20A4	14.7527	0.635699	0.846818	0.750691	0.452838	NA
ANKRD23	40.1776	0.294518	0.637627	0.461897	0.644155	NA
ANKRD24	67.746	-0.190339	0.413633	-0.460165	0.645398	NA
ANKRD26	802.744	0.281391	0.189612	1.48404	0.137799	0.355134
ANKRD27	1661.15	0.21782	0.1076	2.02434	0.0429355	0.180846
ANKRD28	1666.55	0.213367	0.116634	1.82938	0.0673428	0.233261
ANKRD29	46.4567	-0.335519	0.58766	-0.570941	0.56804	NA
ANKRD30A	0.36893	0	6.66256	0	1	NA
ANKRD31	41.49	0.141188	0.507674	0.278109	0.780929	NA
ANKRD33B	51.7405	0.071419	0.590285	0.120991	0.903698	NA
ANKRD34A	106.441	-0.121742	0.290582	-0.418961	0.675245	0.83386
ANKRD34B	62.4045	-0.530553	0.476574	-1.11327	0.265595	NA
ANKRD35	1.21892	2.89426	6.59536	0.438833	0.660782	NA
ANKRD36	151.255	0.261595	0.285603	0.915937	0.3597	0.605062
ANKRD36B	156.306	0.298084	0.304541	0.978798	0.32768	0.575141
ANKRD36C	80.0562	0.770217	0.365145	2.10935	0.0349148	NA
ANKRD37	16.3992	-1.63295	0.998117	-1.63603	0.101834	NA
ANKRD39	543.336	-0.144314	0.138383	-1.04286	0.297012	0.543399
ANKRD40	1540.37	-0.15956	0.132476	-1.20445	0.228417	0.471322
ANKRD42	282.31	0.11931	0.235304	0.507047	0.612122	0.79415
ANKRD44	168.619	-0.163196	0.236992	-0.688615	0.491066	0.712216
ANKRD45	1.39853	1.9339	3.43467	0.563053	0.573399	NA
ANKRD46	486.509	0.391874	0.210347	1.86298	0.0624645	0.223858
ANKRD49	189.747	0.250515	0.253186	0.989449	0.322443	0.570623
ANKRD50	482.29	0.126506	0.170647	0.741329	0.458494	0.687856
ANKRD52	2504	0.15362	0.125593	1.22315	0.221272	0.463743
ANKRD53	5.3289	-2.94512	1.91404	-1.53869	0.12388	NA
ANKRD54	2276.87	-0.0579752	0.0871736	-0.665055	0.506016	0.723
ANKRD6	305.484	-0.256888	0.269509	-0.953172	0.340503	0.586945
ANKRD61	13.0992	0.885584	1.11923	0.791247	0.4288	NA
ANKRD63	7.36032	-0.535151	1.12369	-0.476243	0.633901	NA
ANKRD65	0.541609	0.9296	6.29324	0.147714	0.882568	NA
ANKRD7	19.639	-0.897362	0.744068	-1.20602	0.227809	NA
ANKRD9	478.51	-0.408799	0.161063	-2.53814	0.0111445	0.0828211
ANKS1A	2727.81	-0.0238649	0.101397	-0.235359	0.81393	0.912551
ANKS1B	28.0524	-1.00515	0.770102	-1.30522	0.191817	NA
ANKS3	489.114	0.206794	0.180246	1.14729	0.251264	0.494777
ANKS6	1767.54	-0.0715233	0.0980085	-0.729767	0.465533	0.693647
ANKZF1	1135.24	-0.281862	0.158793	-1.77503	0.0758933	0.249879
ANLN	6351.84	0.221056	0.0810223	2.72833	0.00636553	0.0577468
ANO1	6.2272	-2.15206	1.92497	-1.11797	0.263578	NA
ANO10	1033.4	0.0422773	0.117284	0.360468	0.718497	0.856791
ANO2	6.21376	-0.583158	1.48839	-0.391805	0.695202	NA
ANO4	71.2869	-0.164524	0.443444	-0.371015	0.710626	NA
ANO5	409.075	-0.06067	0.200537	-0.302537	0.762243	0.883821
ANO6	1179.81	0.243431	0.187634	1.29737	0.194505	0.431511
ANO7	90.4826	-0.75798	0.390806	-1.93953	0.0524368	0.202623
ANO7P1	11.5503	1.19802	1.01904	1.17564	0.239738	NA
ANO8	627.567	-0.338608	0.185778	-1.82265	0.0683567	0.235314
ANO9	1.86928	1.36517	2.86915	0.475811	0.634209	NA
ANOS1	2.85106	-3.14832	2.8203	-1.1163	0.264292	NA
ANP32A	11055.9	-0.0311184	0.0961015	-0.323808	0.746083	0.873507
ANP32A-IT1	4.81157	1.6042	1.85841	0.863211	0.388021	NA
ANP32B	10352.6	0.240575	0.136459	1.76299	0.0779027	0.253771
ANP32C	602.756	-0.0403981	0.170798	-0.236525	0.813025	0.912467
ANP32D	0.842038	-0.914084	2.79786	-0.326708	0.743889	NA
ANP32E	2872.74	0.390692	0.176252	2.21667	0.0266456	0.138442
ANPEP	4.79868	-0.0301448	2.12867	-0.0141613	0.988701	NA
ANTXR1	821.275	-0.22374	0.185822	-1.20406	0.228567	0.471322
ANTXR2	174.348	-0.291961	0.315166	-0.926372	0.354253	0.599212
ANXA1	70.0547	0.225375	0.47973	0.469796	0.638501	NA
ANXA11	4097.59	-0.244372	0.0966951	-2.52724	0.0114962	0.084522
ANXA2	1111.41	-0.198647	0.119055	-1.66853	0.0952111	0.285783
ANXA2R	14.7658	-0.582338	0.934169	-0.623375	0.533038	NA
ANXA3	58.0497	-0.123749	0.374227	-0.330679	0.740887	NA
ANXA4	269.923	0.181379	0.182634	0.993133	0.320645	0.568399
ANXA5	5812.13	0.36442	0.132782	2.7445	0.00606025	0.0562095
ANXA6	5472.19	0.195577	0.0920666	2.1243	0.0336451	0.157568
ANXA7	2882.14	0.129493	0.0800901	1.61684	0.105912	0.304279
ANXA8	3.76863	3.05466	1.18739	2.57259	0.0100941	NA
ANXA9	17.8752	-0.997608	0.719225	-1.38706	0.165423	NA
AOAH	0.445682	0	6.66256	0	1	NA
AOC2	99.2126	-0.291685	0.328285	-0.888512	0.374266	0.617873
AOC3	39.7381	-0.488979	0.482341	-1.01376	0.310696	NA
AOX1	1.61119	0.905135	6.53033	0.138605	0.889762	NA
AP1AR	1276.15	0.226595	0.126425	1.79233	0.0730799	0.244837
AP1B1	13705.3	-0.18687	0.0796867	-2.34505	0.0190243	0.113937
AP1G1	3468.82	0.0513553	0.106155	0.483776	0.628545	0.806654
AP1G2	913.051	-0.111934	0.205305	-0.54521	0.585609	0.776627
AP1M1	3174.71	-0.0340598	0.0820067	-0.415329	0.677901	0.835678
AP1S1	695.228	-0.110812	0.173025	-0.640439	0.521887	0.734316
AP1S2	3917.47	0.0270322	0.0971672	0.278203	0.780856	0.89499
AP1S3	718.241	0.345911	0.149928	2.30717	0.0210453	0.121494
AP2A1	7231.95	-0.103776	0.0711906	-1.45772	0.144917	0.365399
AP2A2	7397.03	-0.0714208	0.0576522	-1.23882	0.215412	0.456215
AP2B1	6245.23	0.186663	0.111656	1.67177	0.0945697	0.284362
AP2M1	17723.5	-0.0560367	0.0861759	-0.65026	0.515524	0.729895
AP2S1	4247.1	0.00427385	0.113045	0.0378066	0.969842	0.986383
AP3B1	3225.94	0.397394	0.0934861	4.25084	2.12974e-05	0.00112288
AP3B2	161.796	-0.0566488	0.230515	-0.245748	0.805877	0.90895
AP3D1	16998	0.176902	0.0691468	2.55835	0.010517	0.0798203
AP3M1	6788.05	0.176588	0.0765763	2.30604	0.0211085	0.121625
AP3M2	1586.09	0.0475214	0.104598	0.454324	0.649596	0.820506
AP3S1	1223.96	-0.293976	0.123608	-2.37829	0.0173934	0.108237
AP3S2	3277.73	-0.0622987	0.0716205	-0.869845	0.384385	0.625965
AP4B1	593.497	0.180723	0.129889	1.39137	0.164114	0.390502
AP4B1-AS1	85.3305	-0.322862	0.360967	-0.894437	0.371088	0.614911
AP4E1	702.185	0.195196	0.127287	1.53351	0.12515	0.334608
AP4M1	304.258	-0.388674	0.188422	-2.06278	0.0391334	0.171604
AP4S1	46.5156	0.467166	0.614301	0.760483	0.446966	NA
AP5B1	1894.37	-0.270339	0.124671	-2.16842	0.0301265	0.14892
AP5M1	1716.69	0.243069	0.104295	2.3306	0.0197745	0.116626
AP5S1	362.467	-0.419501	0.238719	-1.7573	0.078866	0.255566
AP5Z1	944.711	0.00519231	0.128815	0.0403082	0.967847	0.985334
APAF1	557.644	0.085388	0.203345	0.419916	0.674547	0.833684
APBA1	20.1385	-0.759224	0.691213	-1.09839	0.272033	NA
APBA2	1514.53	-0.284541	0.0957623	-2.97133	0.00296512	0.0362397
APBA3	971.601	-0.0651412	0.148199	-0.439552	0.660262	0.82649
APBB1	2930.95	-0.268793	0.0688771	-3.9025	9.52032e-05	0.00331197
APBB2	589.696	-0.183524	0.150079	-1.22285	0.221387	0.463878
APBB3	179.737	-0.121661	0.315914	-0.385107	0.700158	0.846168
APC	2986.62	0.160166	0.122458	1.30792	0.190899	0.426741
APC2	104.036	-0.155166	0.282553	-0.549157	0.582898	0.774572
APCDD1	149.393	-0.519714	0.288349	-1.80238	0.0714853	0.241613
APCDD1L-AS1	2.68624	5.78243	2.8355	2.0393	0.04142	NA
APEH	3963.79	-0.0303347	0.0772669	-0.392596	0.694618	0.84372
APEX1	13753.1	-0.225406	0.104873	-2.14933	0.0316083	0.152759
APEX2	2585.42	-0.0750132	0.083449	-0.89891	0.368701	0.612901
APH1A	7992.23	-0.254809	0.107562	-2.36896	0.0178383	0.110075
APH1B	54.497	-0.12366	0.562471	-0.219852	0.825987	NA
API5	8923.32	0.0804354	0.067713	1.18789	0.234878	0.478121
APIP	833.648	-0.0927474	0.150159	-0.617663	0.536797	0.742521
APITD1	358.481	0.42746	0.180158	2.3727	0.0176587	0.109416
APITD1-CORT	240.003	-0.368134	0.21668	-1.69897	0.0893243	0.274187
APLF	134.211	0.0614603	0.26607	0.230992	0.817321	0.914063
APLN	14.6767	-1.43111	0.587791	-2.43472	0.0149033	NA
APLP1	473.944	-0.333061	0.168912	-1.9718	0.0486326	0.193852
APLP2	23173.2	0.16006	0.0961288	1.66506	0.0959002	0.287246
APMAP	3973.43	0.204331	0.0699533	2.92096	0.0034895	0.0398866
APOA1	4.78739	-1.18793	1.74488	-0.68081	0.495992	NA
APOA2	2.62137	-0.94289	5.07184	-0.185907	0.852518	NA
APOA4	2.57852	0	6.66256	0	NA	NA
APOB	2.06529	-0.904668	3.32195	-0.27233	0.785368	NA
APOBEC2	0.781645	-0.00305275	4.36688	-0.000699069	0.999442	NA
APOBEC3A	2.57384	-1.89204	1.63634	-1.15626	0.247573	NA
APOBEC3B	96.4854	0.452384	0.278917	1.62193	0.104818	0.302119
APOBEC3B-AS1	12.1538	-0.350758	0.666058	-0.526618	0.598459	NA
APOBEC3C	330.276	-0.53397	0.165188	-3.2325	0.00122713	0.0203146
APOBEC3D	22.8634	0.238198	0.588381	0.404836	0.685598	NA
APOBEC3F	93.9899	-0.388396	0.293267	-1.32438	0.185378	0.420111
APOBEC3G	7.41871	-0.0489367	1.04961	-0.0466239	0.962813	NA
APOBEC3H	0.966761	0	5.23651	0	1	NA
APOBR	5.3959	1.46289	1.42787	1.02453	0.305585	NA
APOC1	778.732	-0.126897	0.11767	-1.07841	0.280849	0.5265
APOC3	0.667381	0	6.66256	0	1	NA
APOC4-APOC2	0.60154	2.38492	6.61127	0.360736	0.718297	NA
APOD	2.90005	-1.73331	1.80587	-0.959817	0.337148	NA
APOE	49.1682	0.45586	0.452925	1.00648	0.314185	NA
APOL2	189.817	-0.0965757	0.218198	-0.442605	0.658051	0.825327
APOLD1	22.2729	-1.84451	0.837001	-2.20372	0.0275444	NA
APOM	376.398	0.275565	0.152092	1.81183	0.0700127	0.238599
APOO	886.343	-0.0870002	0.112559	-0.772928	0.439565	0.672037
APOOL	322.811	0.259985	0.254601	1.02115	0.307185	0.553911
APOPT1	1149.82	-0.121246	0.150108	-0.807727	0.419248	0.655867
APP	16192.1	0.0840067	0.0665732	1.26187	0.206996	0.446426
APPBP2	987.085	0.128214	0.125671	1.02024	0.307616	0.554354
APPL1	2189.59	0.115639	0.131571	0.878905	0.379453	0.621952
APPL2	1026.64	-0.0249727	0.140047	-0.178317	0.858474	0.935652
APRT	8301.23	-0.299419	0.103104	-2.90405	0.00368375	0.0412044
APTR	395.044	-0.0412177	0.196878	-0.209356	0.83417	0.923419
APTX	1776.81	0.219147	0.119275	1.83732	0.0661622	0.231396
AQP1	2.21842	-0.99893	2.62397	-0.380694	0.70343	NA
AQP11	44.5941	-0.411687	0.468834	-0.878108	0.379885	NA
AQP12B	0.400959	0	6.66256	0	1	NA
AQP3	111.874	-1.26946	0.410169	-3.09497	0.00196832	0.0275657
AQP4	5.26862	-3.30058	2.07326	-1.59197	0.11139	NA
AQP4-AS1	1.07421	4.27956	5.06987	0.844115	0.398605	NA
AQP5	0.647065	3.36753	5.35095	0.629334	0.529131	NA
AQP6	1.42701	-4.67128	3.79912	-1.22957	0.218859	NA
AQP7	2.4645	1.06103	2.40974	0.440311	0.659712	NA
AQP7P5	1.92033	-3.71429	2.58728	-1.43559	0.151118	NA
AQR	2919.57	0.186962	0.0921879	2.02805	0.0425551	0.179967
AR	352.743	0.0888826	0.249572	0.35614	0.721736	0.858756
ARAF	4527.55	-0.579513	0.126504	-4.581	4.62769e-06	0.000343857
ARAP1	2406.84	-0.14695	0.0940248	-1.56289	0.118079	0.323707
ARAP2	257.443	0.233096	0.251148	0.928121	0.353345	0.598679
ARAP3	115.928	-0.210369	0.384277	-0.547442	0.584075	0.775365
ARC	211.228	0.134685	0.950693	0.14167	0.887341	0.951292
ARCN1	5073.84	0.468983	0.0975767	4.8063	1.53748e-06	0.000137708
AREG	5.03774	-0.0155713	1.53738	-0.0101285	0.991919	NA
AREL1	1555.21	0.227355	0.118762	1.91438	0.0555713	0.20954
ARF1	24087.1	0.228387	0.0836199	2.73125	0.00630936	0.0575776
ARF3	4692.31	-0.3075	0.112743	-2.72745	0.0063825	0.0578134
ARF4	1741.15	0.504905	0.110148	4.58388	4.56428e-06	0.000342378
ARF4-AS1	11.4242	-0.14971	0.975554	-0.153461	0.878035	NA
ARF5	7178.52	-0.323293	0.127007	-2.54547	0.010913	0.0818054
ARF6	1914.61	0.0607467	0.104276	0.582556	0.560192	0.758907
ARFGAP1	3733.35	0.0082429	0.097115	0.0848778	0.932359	0.970106
ARFGAP2	2466.03	0.192625	0.0873265	2.2058	0.0273977	0.140941
ARFGAP3	1132.36	0.284813	0.108293	2.63003	0.00853773	0.0695654
ARFGEF1	1904.87	0.113099	0.100465	1.12575	0.260269	0.504156
ARFGEF2	1644.53	0.424345	0.13088	3.24225	0.00118589	0.0198508
ARFGEF3	846.467	0.305039	0.135611	2.24938	0.0244886	0.132092
ARFIP1	888.614	0.315788	0.146987	2.1484	0.0316818	0.152893
ARFIP2	6361.53	0.225518	0.0707643	3.18689	0.00143811	0.0225036
ARFRP1	574.83	0.0795384	0.17739	0.44838	0.653879	0.822799
ARG1	0.99982	-1.9235	4.24654	-0.452956	0.65058	NA
ARG2	1365.09	0.18828	0.124533	1.51189	0.130561	0.344092
ARGLU1	1620.61	0.318265	0.194651	1.63505	0.102038	0.297248
ARHGAP1	1016.23	-0.309064	0.128505	-2.40507	0.0161695	0.104277
ARHGAP10	1015.85	-0.0838198	0.14386	-0.582648	0.560131	0.758907
ARHGAP11A	1863.24	0.24718	0.108566	2.27677	0.0228001	0.126996
ARHGAP11B	126.581	1.16216	0.296383	3.92113	8.81346e-05	0.00312061
ARHGAP12	506.142	0.338949	0.176162	1.92408	0.0543444	0.206929
ARHGAP17	5713.45	-0.166685	0.104531	-1.5946	0.110802	0.312098
ARHGAP18	354.42	0.217684	0.168719	1.29022	0.196976	0.434178
ARHGAP19	46.3497	6.65108	6.48395	1.02578	NA	NA
ARHGAP19-SLIT1	833.821	-0.105956	0.432719	-0.244862	0.806564	0.909056
ARHGAP20	173.333	-0.0617893	0.564901	-0.109381	0.912901	0.961024
ARHGAP21	3712.15	0.180035	0.0948628	1.89785	0.0577163	0.213932
ARHGAP22	580.985	0.0453767	0.155751	0.291341	0.770791	0.888582
ARHGAP23	31.8984	-0.996708	0.583698	-1.70757	0.0877156	NA
ARHGAP24	68.3132	-0.337067	0.397034	-0.848962	0.395902	NA
ARHGAP25	6.90581	0.558349	1.57181	0.355228	0.722419	NA
ARHGAP26	931.3	0.0299904	0.1252	0.239539	0.810688	0.911634
ARHGAP27	328.034	-0.365907	0.207503	-1.76338	0.0778357	0.25375
ARHGAP28	88.1913	0.0720393	0.346359	0.20799	0.835236	0.92385
ARHGAP29	915.444	0.116252	0.126539	0.918706	0.358249	0.603383
ARHGAP30	34.3024	0.717464	0.540402	1.32765	0.184295	NA
ARHGAP31	276.451	-0.158446	0.18789	-0.843293	0.399065	0.639292
ARHGAP31-AS1	6.83082	-1.05115	0.996107	-1.05526	0.291306	NA
ARHGAP32	1082.4	-0.159108	0.142187	-1.11901	0.263138	0.507256
ARHGAP33	349.634	-0.235482	0.210638	-1.11794	0.263592	0.507639
ARHGAP35	2427.99	0.0401431	0.104045	0.385825	0.699626	0.845781
ARHGAP39	1153.49	0.0786973	0.124704	0.631072	0.527994	0.73713
ARHGAP4	49.4982	0.495052	0.607144	0.815379	0.414855	NA
ARHGAP40	4.34964	-5.07457	2.11277	-2.40186	0.0163119	NA
ARHGAP42	123.141	-0.438988	0.29196	-1.50359	0.132687	0.347102
ARHGAP44	948.913	0.00425161	0.115858	0.0366967	0.970727	0.986759
ARHGAP5	2098.48	0.111667	0.131767	0.847463	0.396737	0.637799
ARHGAP5-AS1	153.24	-0.35126	0.203242	-1.72829	0.0839369	0.265108
ARHGAP6	4.23008	-0.568373	1.62371	-0.350047	0.726304	NA
ARHGAP8	204.782	2.65984	1.82233	1.45958	0.144405	0.364797
ARHGAP9	13.2729	-0.372294	1.37304	-0.271146	0.786279	NA
ARHGDIA	27457.2	-0.529853	0.134036	-3.95305	7.71597e-05	0.00288496
ARHGDIB	7.30544	0.402855	1.57969	0.255021	0.798707	NA
ARHGDIG	225.251	-0.241452	0.266026	-0.907626	0.364076	0.608785
ARHGEF1	1696.04	0.00178524	0.092577	0.0192838	0.984615	0.993012
ARHGEF10	1122.86	0.315523	0.115704	2.72698	0.00639178	0.0578235
ARHGEF10L	222.23	-0.155411	0.23497	-0.661407	0.508352	0.72504
ARHGEF11	1899.07	-0.179071	0.110762	-1.61672	0.105939	0.304279
ARHGEF12	3160.96	0.297125	0.127291	2.33422	0.0195843	0.115819
ARHGEF15	2.14584	-1.92609	6.63456	-0.290312	0.771578	NA
ARHGEF16	160.57	-0.907527	0.291417	-3.11418	0.00184455	0.0264495
ARHGEF17	477.023	-0.338212	0.170501	-1.98364	0.0472962	0.190481
ARHGEF18	1739.22	-0.14923	0.101747	-1.46668	0.142464	0.361567
ARHGEF19	65.9951	-0.28372	0.38697	-0.733183	0.463447	NA
ARHGEF2	1808.15	-0.108837	0.103211	-1.05451	0.29165	0.537875
ARHGEF25	1018.72	-0.376125	0.175648	-2.14136	0.0322452	0.154517
ARHGEF26	961.443	0.0752485	0.118826	0.633265	0.52656	0.736743
ARHGEF26-AS1	15.3821	0.763728	0.881766	0.866136	0.386416	NA
ARHGEF28	83.8188	0.411997	0.475009	0.867346	0.385752	0.627089
ARHGEF3	377.129	-0.148465	0.259884	-0.571275	0.567813	0.764516
ARHGEF33	7.47068	2.22523	1.2807	1.73751	0.0822964	NA
ARHGEF35	1.20087	-2.924	3.30603	-0.884444	0.376457	NA
ARHGEF37	17.6504	-0.35337	0.933093	-0.378708	0.704905	NA
ARHGEF38	35.1306	-0.117333	0.498912	-0.235179	0.81407	NA
ARHGEF39	2626.11	-0.246096	0.0858868	-2.86535	0.00416548	0.0445357
ARHGEF4	391.78	-0.307637	0.178682	-1.7217	0.0851244	0.267381
ARHGEF40	413.687	-0.210101	0.155653	-1.3498	0.17708	0.409107
ARHGEF5	24.5452	0.239291	0.630335	0.379625	0.704224	NA
ARHGEF6	235.795	0.65174	0.22978	2.83636	0.00456303	0.0471714
ARHGEF7	891.615	0.215939	0.146783	1.47115	0.14125	0.359771
ARHGEF7-AS2	0.331873	0.587131	6.58537	0.0891568	0.928957	NA
ARHGEF9	495.019	0.389268	0.195155	1.99466	0.0460798	0.188211
ARID1A	6394.7	-0.00875551	0.098657	-0.0887469	0.929283	0.968669
ARID1B	4904.18	-0.088327	0.0941346	-0.938305	0.348088	0.593888
ARID2	2536.9	-0.036317	0.1064	-0.341325	0.732859	0.865385
ARID3A	686.76	-0.298542	0.149603	-1.99556	0.0459818	0.188211
ARID3B	1342.52	-0.0175673	0.144245	-0.121788	0.903067	0.957255
ARID3C	22.5495	0.0509501	0.453811	0.112272	0.910608	NA
ARID4A	792.488	0.214289	0.160578	1.33448	0.182046	0.416133
ARID4B	1780.52	0.308094	0.142294	2.16519	0.0303735	0.149531
ARID5A	807.745	-0.185208	0.142841	-1.2966	0.194767	0.431886
ARID5B	391.719	-0.276449	0.23108	-1.19634	0.231566	0.474832
ARIH1	1421.76	0.376866	0.0908049	4.15028	3.32066e-05	0.00158783
ARIH2	3600.98	0.276397	0.0711882	3.88263	0.000103335	0.00349359
ARIH2OS	254.708	0.240532	0.18528	1.29821	0.194215	0.43134
ARL1	1718.52	0.231939	0.147185	1.57583	0.115064	0.319085
ARL10	187.653	0.519813	0.218325	2.38091	0.01727	0.107619
ARL13B	1071.55	0.27009	0.153609	1.75829	0.0786978	0.255279
ARL14	0.465043	0	6.66256	0	1	NA
ARL14EP	353.72	0.155599	0.203264	0.7655	0.443974	0.675443
ARL15	239.914	0.151903	0.213866	0.710272	0.477535	0.702203
ARL16	1185.51	-0.131415	0.113645	-1.15637	0.24753	0.490725
ARL17A	519.207	-0.0592852	0.152126	-0.389712	0.69675	0.844344
ARL17B	443.697	-0.216368	0.176802	-1.22379	0.221032	0.463743
ARL2	2937.72	-0.179593	0.107172	-1.67574	0.0937887	0.282614
ARL2-SNX15	2673.3	-0.259352	0.108504	-2.39026	0.0168362	0.106621
ARL2BP	1562.78	0.0290429	0.121975	0.238106	0.811799	0.912228
ARL3	945.923	0.0991204	0.152895	0.648292	0.516796	0.73092
ARL4A	81.7074	-0.185655	0.431216	-0.430539	0.666804	0.829362
ARL4C	211	0.242873	0.19871	1.22225	0.221614	0.463947
ARL4D	106.763	0.105182	0.255824	0.411151	0.680962	0.837065
ARL5A	734.935	0.429251	0.215152	1.9951	0.0460315	0.188211
ARL5B	432.074	0.383571	0.200767	1.91053	0.0560651	0.21061
ARL5C	0.358086	0	6.66256	0	1	NA
ARL6	515.877	0.026655	0.161532	0.165014	0.868933	0.94192
ARL6IP1	3076.3	0.249636	0.0894838	2.78973	0.00527518	0.0511666
ARL6IP4	4333.27	-0.0350391	0.123057	-0.284738	0.775845	0.891497
ARL6IP5	782.851	-0.203797	0.134827	-1.51155	0.130648	0.344104
ARL6IP6	1341.53	0.123456	0.114487	1.07833	0.280885	0.5265
ARL8A	779.391	-0.449042	0.177202	-2.53407	0.0112745	0.0835291
ARL8B	388.958	0.232205	0.140469	1.65306	0.0983178	0.291328
ARL9	3.14688	-0.995101	2.19205	-0.45396	0.649858	NA
ARMC1	468.626	0.0748729	0.175012	0.427816	0.668785	0.830326
ARMC10	548.136	0.404786	0.161645	2.50416	0.0122743	0.0881902
ARMC12	2.02282	-4.33935	2.71418	-1.59877	0.109871	NA
ARMC2	99.27	-0.0352784	0.373278	-0.0945097	0.924704	0.966498
ARMC3	13.4732	2.66841	1.08634	2.45634	0.0140362	NA
ARMC4	225.337	-0.1202	0.223511	-0.537783	0.590727	0.780222
ARMC4P1	9.91116	1.25584	0.875228	1.43487	0.151323	NA
ARMC5	1452.48	-0.367656	0.140623	-2.61447	0.00893654	0.0719848
ARMC6	5199.63	0.0100588	0.0725835	0.138583	0.88978	0.952484
ARMC7	656.723	0.114658	0.137389	0.834548	0.403972	0.643354
ARMC8	1038.95	0.255897	0.119145	2.14779	0.0317308	0.153068
ARMC9	895.175	0.168349	0.120439	1.39779	0.162175	0.387811
ARMCX1	0.468603	-1.86194	6.63803	-0.280496	0.779097	NA
ARMCX2	116.245	0.141984	0.328851	0.431758	0.665917	0.828995
ARMCX3	440.563	0.697037	0.175723	3.96667	7.28838e-05	0.00279473
ARMCX4	81.0104	0.135855	0.321329	0.422789	0.672449	NA
ARMCX5	897.752	0.290852	0.128991	2.25483	0.024144	0.13118
ARMCX5-GPRASP2	160.998	0.127371	0.189767	0.671196	0.502096	0.720522
ARMCX6	782.598	-0.078374	0.183409	-0.427317	0.669148	0.830639
ARMS2	0.382433	1.8004	6.6379	0.27123	0.786214	NA
ARMT1	1244.16	0.0751287	0.102235	0.734862	0.462424	0.69116
ARNT	2759.5	-0.138414	0.114237	-1.21164	0.225649	0.468193
ARNT2	306.859	-0.279701	0.199212	-1.40403	0.160308	0.385267
ARNTL	322.24	0.163446	0.143203	1.14136	0.253718	0.497083
ARNTL2	366.591	0.180746	0.179396	1.00752	0.313683	0.561244
ARNTL2-AS1	8.00542	1.06841	0.922049	1.15873	0.246565	NA
ARPC1A	4250.43	0.299136	0.092387	3.23786	0.00120428	0.0200393
ARPC1B	885.196	-0.170262	0.147455	-1.15467	0.248226	0.491708
ARPC2	7286.34	-0.0101284	0.0728211	-0.139087	0.889382	0.952359
ARPC3	3335.9	-0.0301926	0.0933033	-0.323597	0.746243	0.873541
ARPC4	948.281	0.419879	0.185797	2.25988	0.0238287	0.13053
ARPC4-TTLL3	116.803	-0.956506	3.87798	-0.24665	0.805179	0.908504
ARPC5	2577.97	0.00890628	0.156029	0.0570808	0.954481	0.980583
ARPC5L	991.466	0.181897	0.148536	1.2246	0.220727	0.463383
ARPIN	251.168	0.32949	0.207802	1.58559	0.112831	0.315004
ARPP19	449.248	0.00208395	0.202965	0.0102675	0.991808	0.99604
ARR3	7.20732	-1.85538	1.23619	-1.50089	0.133384	NA
ARRB1	281.53	-0.626942	0.162242	-3.86424	0.000111434	0.00367426
ARRB2	6573.14	-0.333811	0.117251	-2.84699	0.00441352	0.0462225
ARRDC1	923.535	-0.429718	0.124438	-3.45327	0.000553829	0.0116615
ARRDC1-AS1	1145.59	-0.243939	0.14096	-1.73056	0.0835305	0.264521
ARRDC2	208.972	-0.366729	0.242309	-1.51348	0.130158	0.343708
ARRDC3	430.997	0.15749	0.207234	0.759963	0.447277	0.677634
ARRDC3-AS1	20.4967	0.463781	0.769096	0.603021	0.546495	NA
ARRDC4	519.804	0.246538	0.204123	1.20779	0.227128	0.469998
ARRDC5	14.6717	-0.698907	0.676014	-1.03386	0.3012	NA
ARSA	535.644	-0.414755	0.156866	-2.64401	0.00819304	0.0679094
ARSB	413.477	0.163139	0.184587	0.883802	0.376803	0.61993
ARSE	5.72024	-2.46797	1.75056	-1.40981	0.158594	NA
ARSG	179.311	-0.05524	0.24166	-0.228586	0.819191	0.914513
ARSI	1.92902	4.95128	6.18915	0.799994	0.423714	NA
ARSJ	84.131	-0.320845	0.308582	-1.03974	0.298462	0.544563
ARSK	246.487	0.159051	0.267489	0.594607	0.552106	0.752965
ART1	2.67205	-0.991813	2.56393	-0.386834	0.698879	NA
ART5	248.719	-0.306366	0.244838	-1.2513	0.210825	0.450637
ARTN	2.85133	2.09234	2.17591	0.961593	0.336254	NA
ARV1	2843.99	0.0972562	0.0869101	1.11904	0.263122	0.507256
ARVCF	454.071	0.307258	0.158031	1.94429	0.0518606	0.200719
ARX	2.06055	-1.9999	3.32582	-0.601324	0.547624	NA
ASAH1	1043.13	0.157573	0.111407	1.41439	0.157247	0.381204
ASAH2	118.179	-0.0295495	0.321453	-0.0919249	0.926758	0.967863
ASAH2B	385.068	0.292026	0.198869	1.46844	0.141986	0.360659
ASAP1	3291.22	-0.0484982	0.119356	-0.406331	0.684499	0.838585
ASAP1-IT2	0.756702	1.80173	4.77375	0.377424	0.705859	NA
ASAP2	543.28	-0.223226	0.187406	-1.19114	0.2336	0.476934
ASAP3	310.16	0.0555677	0.197586	0.281233	0.778532	0.893387
ASB1	558.514	-0.0726855	0.143799	-0.505467	0.613231	0.794816
ASB10	0.516335	0.929709	4.82476	0.192695	0.847198	NA
ASB12	19.2105	-0.223554	0.803965	-0.278064	0.780963	NA
ASB13	1759.25	0.00920271	0.0805848	0.114199	0.90908	0.959021
ASB14	4.67951	0.368542	1.24609	0.295758	0.767415	NA
ASB16	2.21107	-1.61696	2.21637	-0.729552	0.465664	NA
ASB16-AS1	299.524	-0.345497	0.277965	-1.24295	0.213885	0.453933
ASB18	5.3037	-0.459678	1.22429	-0.375465	0.707315	NA
ASB2	1.60991	-4.69376	3.34969	-1.40125	0.16114	NA
ASB5	2.74187	-2.21367	3.02336	-0.732189	0.464053	NA
ASB6	1933.77	-0.430144	0.116791	-3.68303	0.000230482	0.00618846
ASB7	186.196	0.135536	0.241689	0.560788	0.574942	0.769119
ASB8	570.964	0.3471	0.128949	2.69175	0.00710777	0.0620418
ASCC1	1368.67	0.208775	0.121212	1.7224	0.0849977	0.267053
ASCC2	4662.75	-0.0825285	0.0618639	-1.33403	0.182193	0.416272
ASCC3	4100.75	0.278901	0.114881	2.42774	0.0151934	0.100589
ASCL2	0.380685	0	6.66256	0	1	NA
ASCL5	2.69435	2.38836	3.12448	0.764402	0.444628	NA
ASF1A	933.65	0.0686105	0.131139	0.523188	0.600844	0.786747
ASF1B	766.113	0.0746438	0.150531	0.495871	0.619986	0.800115
ASGR1	12.4551	0.911045	0.993093	0.917381	0.358943	NA
ASH1L	3825.89	0.165957	0.144607	1.14764	0.251117	0.494776
ASH1L-AS1	149.053	-0.30492	0.26473	-1.15182	0.249397	0.492694
ASH2L	1960.04	-0.0542903	0.0837286	-0.648409	0.516721	0.7309
ASIC1	1753.68	-0.20593	0.127153	-1.61955	0.10533	0.303231
ASIC2	0.368638	0.87363	6.51383	0.134119	0.893308	NA
ASIC3	136.886	-0.902414	0.335918	-2.68641	0.00722237	0.0626775
ASIC4	2.94492	2.0081	2.40295	0.83568	0.403335	NA
ASIP	0.904168	0	4.55159	0	1	NA
ASL	606.056	-0.0690347	0.144211	-0.478705	0.632148	0.808552
ASMTL	993.663	0.133635	0.142912	0.935087	0.349744	0.595209
ASNA1	4446.53	-0.0461152	0.0827253	-0.55745	0.57722	0.77044
ASNS	7776.94	0.594437	0.0719384	8.26314	1.41894e-16	6.30743e-14
ASNSD1	2700.74	0.132163	0.110895	1.19179	0.233345	0.4767
ASPDH	6.51537	1.98806	1.1304	1.75873	0.0786241	NA
ASPG	4.39692	-6.13066	2.10857	-2.9075	0.00364336	NA
ASPH	1648.4	0.371717	0.116505	3.19057	0.0014199	0.0223351
ASPHD1	95.2263	-0.0026539	0.346414	-0.00766105	0.993887	0.997211
ASPHD2	189.854	-0.0163679	0.289491	-0.0565403	0.954911	0.980583
ASPM	7498.62	0.313671	0.109847	2.85552	0.00429665	0.0453947
ASPN	0.374791	-4.38607	6.57174	-0.667414	0.504507	NA
ASPRV1	20.8118	0.75487	0.684671	1.10253	0.270231	NA
ASPSCR1	1224.99	-0.218814	0.108001	-2.02603	0.0427613	0.18044
ASRGL1	985.98	-0.0314669	0.130334	-0.241433	0.809219	0.910922
ASS1	1337.28	-0.140459	0.105157	-1.3357	0.181648	0.415925
ASTE1	640.878	0.00233751	0.127015	0.0184034	0.985317	0.993012
ASTL	0.675447	0	6.48029	0	1	NA
ASTN1	40.3141	-0.976233	0.550988	-1.77179	0.0764299	NA
ASTN2	136.241	-0.0259236	0.319434	-0.0811547	0.935319	0.971806
ASUN	4063.07	-0.0459914	0.068617	-0.670262	0.502691	0.720996
ASXL1	3644.35	0.220867	0.0791075	2.79198	0.0052386	0.0510133
ASXL2	1895.55	0.284496	0.140103	2.03062	0.042294	0.179711
ASXL3	188.872	-0.0359084	0.3065	-0.117156	0.906736	0.958569
ATAD1	2886.55	0.371263	0.106015	3.50198	0.000461816	0.0102453
ATAD2	5118.01	0.166902	0.0872999	1.91182	0.0558991	0.210314
ATAD2B	1080.52	0.317079	0.179498	1.76647	0.0773172	0.253006
ATAD3A	5633.17	0.043921	0.0850754	0.516259	0.605674	0.790209
ATAD3B	3826.42	0.0426556	0.102144	0.417603	0.676238	0.834657
ATAD3C	284.566	0.240975	0.227716	1.05823	0.289952	0.536293
ATAD5	1278.62	-0.018454	0.121101	-0.152384	0.878884	0.947561
ATAT1	548.562	-0.0291637	0.187317	-0.155692	0.876276	0.946545
ATE1	1454.23	0.0639294	0.0998849	0.640031	0.522152	0.734511
ATE1-AS1	10.7312	-0.993444	0.927397	-1.07122	0.284071	NA
ATF1	1569.93	-0.0152948	0.119948	-0.127512	0.898535	0.955836
ATF2	1989.49	0.25509	0.0906274	2.81471	0.00488212	0.0491984
ATF3	2605.24	0.383333	0.156078	2.45603	0.0140482	0.0959839
ATF4	28565.1	0.147889	0.0769933	1.92081	0.0547563	0.20748
ATF5	484.678	-0.729995	0.17044	-4.28299	1.84396e-05	0.000992431
ATF6	3990.48	0.255918	0.0944764	2.70881	0.00675256	0.059847
ATF6B	4583.95	-0.258353	0.151585	-1.70434	0.0883175	0.272719
ATF7	814.276	-0.0662858	0.161532	-0.410357	0.681544	0.837097
ATF7IP	3368.63	0.0632635	0.114268	0.553639	0.579826	0.772224
ATF7IP2	186.426	0.482488	0.250495	1.92614	0.0540873	0.206409
ATG10	78.2107	0.874263	0.37633	2.32313	0.0201721	NA
ATG101	559.975	0.253617	0.134655	1.88346	0.0596377	0.218223
ATG12	1471.15	0.153322	0.137683	1.11359	0.265455	0.509249
ATG13	2915.73	0.110061	0.0923683	1.19154	0.233442	0.476734
ATG14	321.633	0.0961196	0.203096	0.473272	0.636019	0.81173
ATG16L1	913.867	0.0981518	0.133882	0.733121	0.463484	0.69171
ATG16L2	325.734	-0.0263479	0.19543	-0.13482	0.892754	0.953296
ATG2A	3453.2	-0.0975211	0.0919835	-1.0602	0.289053	0.535042
ATG2B	1684.26	0.236708	0.145245	1.62971	0.103163	0.299072
ATG3	1807.86	0.106565	0.100281	1.06267	0.287933	0.53404
ATG4A	960.985	-0.166916	0.112692	-1.48117	0.138561	0.356128
ATG4B	2355.09	0.077957	0.0962011	0.810355	0.417736	0.654476
ATG4C	1243.61	-0.0935005	0.113676	-0.82252	0.410781	0.64888
ATG4D	1784.33	-0.0248062	0.0853125	-0.290769	0.771228	0.888737
ATG5	1546.01	0.143377	0.101558	1.41177	0.158016	0.38213
ATG7	1037.37	-0.0434529	0.108057	-0.402131	0.687588	0.839678
ATG9A	6760.81	-0.0288584	0.0976859	-0.29542	0.767673	0.887281
ATG9B	15.3646	-1.48773	0.883439	-1.68402	0.092177	NA
ATHL1	371.931	-0.418945	0.229043	-1.82911	0.0673831	0.233301
ATIC	10838.8	0.0948751	0.0702741	1.35007	0.176993	0.408984
ATL1	182.73	0.0501082	0.259477	0.193113	0.846871	0.928741
ATL2	1969.33	0.140751	0.0966016	1.45702	0.145111	0.365733
ATL3	535.679	0.0638086	0.164909	0.386933	0.698806	0.845268
ATM	1002.94	0.439785	0.28925	1.52043	0.128403	0.340272
ATMIN	2886.13	0.18022	0.0784277	2.29791	0.0215668	0.123025
ATN1	12242.4	-0.434643	0.17562	-2.47491	0.013327	0.0928863
ATOH1	12.0875	-0.567801	1.26377	-0.44929	0.653222	NA
ATOH7	6.02604	-2.25349	1.3928	-1.61795	0.105674	NA
ATOH8	28.1119	-2.17471	0.599772	-3.62589	0.000287963	NA
ATOX1	493.133	-0.269136	0.154883	-1.73768	0.0822672	0.262111
ATP10D	555.588	0.00513351	0.225935	0.0227212	0.981873	0.992476
ATP11A	578.44	0.443823	0.199235	2.22764	0.0259047	0.136654
ATP11A-AS1	0.326515	-2.86096	6.59802	-0.43361	0.664572	NA
ATP11B	2179.4	0.101274	0.115516	0.876715	0.380641	0.623
ATP11C	3428.98	0.0940654	0.0862581	1.09051	0.275488	0.520092
ATP12A	14.7736	-0.799176	1.11093	-0.719374	0.471911	NA
ATP13A1	6323.14	-0.0578908	0.0965725	-0.599454	0.54887	0.750935
ATP13A2	5598.26	-0.0355351	0.101662	-0.349543	0.726682	0.861492
ATP13A3	1527.68	0.178138	0.175981	1.01226	0.311415	0.558518
ATP13A4	0.709749	2.80015	5.33586	0.524779	0.599737	NA
ATP13A5	1.20453	-0.568722	3.22558	-0.176316	0.860045	NA
ATP13A5-AS1	3.5867	1.97191	2.07659	0.949589	0.342321	NA
ATP1A1	42330.6	0.163688	0.0634997	2.57778	0.00994382	0.077281
ATP1A1-AS1	2066.57	-0.0122463	0.264759	-0.0462547	0.963107	0.983579
ATP1A2	1.09009	0.494795	2.44917	0.202026	0.839897	NA
ATP1A3	1379.73	-0.27582	0.103602	-2.66231	0.0077606	0.0656106
ATP1A4	0.76961	4.58939	5.00035	0.917814	0.358716	NA
ATP1B1	552.21	0.107859	0.16168	0.667117	0.504698	0.721954
ATP1B2	79.0586	-0.377394	0.459425	-0.821449	0.411391	NA
ATP1B3	2594.72	0.392916	0.109927	3.57432	0.000351133	0.00847947
ATP1B4	0.925989	-0.993646	6.66256	-0.149139	0.881444	NA
ATP23	255.579	-0.500679	0.252637	-1.98181	0.0475006	0.190925
ATP2A1	119.612	-0.129275	0.245	-0.527652	0.597741	0.784739
ATP2A1-AS1	733.601	-0.471133	0.140385	-3.356	0.000790781	0.0150173
ATP2A2	15145.1	0.577637	0.0776854	7.4356	1.04098e-13	3.90431e-11
ATP2A3	111.361	-0.547149	0.381757	-1.43324	0.15179	0.375007
ATP2B1	4279.12	0.347948	0.0831095	4.18662	2.83138e-05	0.00141005
ATP2B2	0.666702	-3.19086	5.33123	-0.598522	0.549491	NA
ATP2B3	17.6185	-1.35033	1.0348	-1.30491	0.191923	NA
ATP2B4	697.922	0.213031	0.137658	1.54754	0.121734	0.3294
ATP2C1	2089.18	0.486719	0.099174	4.90773	9.21387e-07	8.91813e-05
ATP2C2	1.00631	0.553452	3.05103	0.181399	0.856055	NA
ATP4A	3.77738	-2.69599	1.96486	-1.37211	0.17003	NA
ATP5A1	17384.9	0.14726	0.0658489	2.23634	0.0253298	0.134755
ATP5B	50464	0.0332206	0.0532465	0.623902	0.532692	0.739843
ATP5C1	11796.1	-0.0260717	0.0823686	-0.316524	0.751605	0.877165
ATP5D	4314.04	-0.157463	0.0988916	-1.59228	0.111322	0.312953
ATP5E	3280.41	-0.0273617	0.126463	-0.216362	0.828706	0.919923
ATP5F1	10161.8	0.0573183	0.0844578	0.678662	0.497352	0.717109
ATP5G1	4445.32	-0.169154	0.102519	-1.64998	0.0989476	0.292361
ATP5G2	22128.2	-0.301196	0.10191	-2.9555	0.0031216	0.0372298
ATP5G3	9280.13	-0.0540724	0.0875169	-0.61785	0.536674	0.742514
ATP5H	3678.69	-0.141273	0.0829	-1.70413	0.0883564	0.272719
ATP5I	3368.62	-0.159471	0.170034	-0.937882	0.348305	0.593888
ATP5J	9589.08	-0.0244481	0.124876	-0.195778	0.844784	0.928318
ATP5J2	9925.04	-0.527778	0.109941	-4.80057	1.58215e-06	0.000140659
ATP5J2-PTCD1	3592.52	-0.0823933	0.112685	-0.731182	0.464668	0.692985
ATP5L	11345.6	-0.522616	0.10023	-5.21415	1.84662e-07	2.11172e-05
ATP5L2	35.3925	-0.158169	0.379062	-0.417265	0.676485	NA
ATP5O	8595.08	-0.115139	0.0771862	-1.49171	0.135776	0.352418
ATP5S	256.969	-0.0326063	0.186246	-0.175072	0.861023	0.936934
ATP5SL	2931.82	-0.304677	0.111026	-2.7442	0.00606586	0.0562181
ATP6	321897	0.060941	0.133347	0.457011	0.647663	0.819884
ATP6AP1	9043.92	0.00891653	0.0714766	0.124748	0.900723	0.95626
ATP6AP1L	59.0666	-0.781336	0.49785	-1.56942	0.11655	NA
ATP6AP2	2839.76	-0.00890336	0.0867561	-0.102625	0.91826	0.963371
ATP6V0A1	7888.36	0.31555	0.104011	3.03381	0.00241485	0.031742
ATP6V0A2	1884.96	0.644302	0.109954	5.85974	4.63601e-09	7.83682e-07
ATP6V0A4	0.616881	-2.44689	5.49978	-0.444907	0.656387	NA
ATP6V0B	3367.18	0.0427892	0.105519	0.405511	0.685102	0.838869
ATP6V0C	10029.5	-0.028505	0.148329	-0.192174	0.847606	0.928989
ATP6V0D1	3425.08	-0.0303168	0.107555	-0.281872	0.778042	0.893121
ATP6V0D2	2.98866	0.0410581	2.78923	0.0147202	0.988255	NA
ATP6V0E1	1235.63	0.0363113	0.130474	0.278303	0.78078	0.89499
ATP6V0E2	8539.68	-0.280868	0.114001	-2.46374	0.0137496	0.0950022
ATP6V0E2-AS1	236.874	-0.359631	0.277408	-1.2964	0.194839	0.431886
ATP6V1A	1388.89	0.42724	0.123152	3.46922	0.000521978	0.0112474
ATP6V1B1	52.8199	0.458437	0.524564	0.873939	0.382151	NA
ATP6V1B1-AS1	118.738	-1.06237	0.347112	-3.0606	0.00220891	0.0297821
ATP6V1B2	3699.16	0.271519	0.0739598	3.67117	0.000241442	0.00641104
ATP6V1C1	1338.89	0.174242	0.164001	1.06244	0.288034	0.534062
ATP6V1C2	2335.2	0.601682	0.114175	5.26981	1.36569e-07	1.62287e-05
ATP6V1D	1247.79	0.231768	0.150139	1.54368	0.122665	0.330911
ATP6V1E1	1896.07	0.332435	0.102312	3.24922	0.00115721	0.0195128
ATP6V1E2	25.1848	0.668948	0.688024	0.972275	0.330914	NA
ATP6V1F	7314.67	-0.350771	0.107948	-3.24945	0.00115627	0.0195128
ATP6V1G1	4377.12	-0.0280421	0.0952004	-0.294558	0.768331	0.887281
ATP6V1G2	16.5889	-0.791867	0.799935	-0.989914	0.322216	NA
ATP6V1G2-DDX39B	4167.16	0.484976	0.736907	0.658124	0.510459	0.726498
ATP6V1H	825.889	0.256193	0.21317	1.20183	0.229431	0.472158
ATP7A	649.897	-0.00729571	0.20302	-0.035936	0.971333	0.987125
ATP7B	1499.52	0.138896	0.0875803	1.58593	0.112755	0.314929
ATP8	78163	0.279008	0.273505	1.02012	0.30767	0.554354
ATP8A1	608.254	0.0303436	0.182932	0.165873	0.868257	0.941527
ATP8A2	15.2599	-0.313066	0.769404	-0.406893	0.684086	NA
ATP8B1	27.1985	-0.996251	0.633532	-1.57253	0.115827	NA
ATP8B2	3892.71	0.0693455	0.0707975	0.979491	0.327338	0.574877
ATP8B3	14.7765	-0.120031	0.804599	-0.149181	0.881411	NA
ATP8B4	2.33335	-4.56253	2.79653	-1.6315	0.102786	NA
ATP9A	558.567	-0.206345	0.179827	-1.14746	0.251192	0.494777
ATP9B	373.429	0.0101349	0.196828	0.0514911	0.958934	0.981732
ATPAF1	2743.53	0.108797	0.095752	1.13624	0.255855	0.499585
ATPAF2	979.031	-0.019236	0.13019	-0.147753	0.882538	0.949107
ATPIF1	7294.17	-0.0834037	0.106281	-0.78475	0.4326	0.66751
ATR	2134.85	0.224285	0.121209	1.85039	0.064257	0.227832
ATRAID	2988.62	-0.16438	0.107781	-1.52514	0.127225	0.33842
ATRIP	1593.11	-0.0413203	0.118758	-0.347938	0.727887	0.861728
ATRN	1543.79	0.355328	0.10824	3.28279	0.00102786	0.0180204
ATRNL1	174.553	0.0922711	0.286171	0.322434	0.747124	0.873975
ATRX	2390.46	0.346724	0.157538	2.20089	0.0277435	0.141859
ATXN1	247.581	-0.319604	0.264729	-1.20729	0.22732	0.470072
ATXN10	4597.82	0.16218	0.0779183	2.08142	0.0373959	0.167249
ATXN1L	863.618	-0.227491	0.209586	-1.08543	0.277731	0.522547
ATXN2	5786.87	-0.194582	0.145743	-1.3351	0.181843	0.416027
ATXN2L	16639.2	-0.277355	0.181532	-1.52786	0.126548	0.337191
ATXN3	501.521	0.284441	0.145993	1.94832	0.0513767	0.199619
ATXN3L	0.690187	0.929696	4.55211	0.204234	0.838171	NA
ATXN7	911.566	0.1423	0.1415	1.00565	0.314583	0.562316
ATXN7L1	354.596	-0.193002	0.218956	-0.881466	0.378066	0.621326
ATXN7L2	1200.29	-0.198156	0.144696	-1.36947	0.170854	0.400074
ATXN7L3	800.839	-0.0761149	0.123175	-0.617943	0.536613	0.742514
ATXN7L3B	296.335	0.0704311	0.172521	0.408247	0.683093	0.838025
AUH	465.872	0.307045	0.162497	1.88954	0.0588196	0.216484
AUNIP	974.341	0.0866325	0.152703	0.567326	0.570492	0.766484
AUP1	9613.95	-0.122195	0.105822	-1.15472	0.248206	0.491708
AURKA	3546.41	-0.1523	0.0892285	-1.70685	0.0878499	0.272026
AURKAIP1	5325.84	-0.207671	0.0954855	-2.1749	0.0296378	0.147356
AURKB	6759.18	-0.0514272	0.0660202	-0.778961	0.436003	0.670369
AURKC	21.5931	-1.30489	0.819902	-1.59152	0.111493	NA
AUTS2	3162.31	-0.266666	0.154455	-1.7265	0.084258	0.265842
AVEN	406.882	0.234755	0.172735	1.35905	0.174131	0.405007
AVIL	17.4994	-0.223088	0.772245	-0.288882	0.772671	NA
AVL9	610.717	0.0595719	0.144976	0.410909	0.681139	0.837065
AVPI1	178.666	-0.540129	0.234898	-2.29942	0.0214813	0.122829
AVPR1A	1.24145	0.856361	3.54738	0.241406	0.80924	NA
AVPR2	0.680342	-0.0319988	4.98917	-0.00641365	0.994883	NA
AWAT1	0.620404	2.89396	5.93331	0.487748	0.625728	NA
AXDND1	5.78374	-0.97553	1.59531	-0.611499	0.540869	NA
AXIN1	4033.77	-0.10107	0.0879326	-1.1494	0.250391	0.494193
AXIN2	551.385	-0.391007	0.152805	-2.55887	0.0105014	0.0798203
AXL	3.52974	-0.963282	1.70482	-0.565033	0.572051	NA
AZI2	1220.08	0.332497	0.101243	3.28415	0.00102292	0.0180204
AZIN1	1479.11	0.271794	0.115739	2.34833	0.0188577	0.113384
AZIN1-AS1	12.4263	0.219475	0.862358	0.254505	0.799105	NA
AZIN2	178.443	-0.141082	0.313304	-0.450304	0.652491	0.822173
AZU1	0.313391	-0.993662	6.66256	-0.149141	0.881442	NA
B2M	4685.52	0.0362293	0.103106	0.351379	0.725304	0.860698
B3GALNT1	120.144	0.0966873	0.268026	0.360739	0.718295	0.856791
B3GALNT2	2154.64	0.14135	0.0972342	1.4537	0.146029	0.367122
B3GALT1	17.6315	0.0886413	0.774611	0.114433	0.908894	NA
B3GALT4	3.8895	-0.233352	1.54271	-0.151261	0.87977	NA
B3GALT5	1.15253	-1.02759	3.58217	-0.286862	0.774218	NA
B3GALT5-AS1	2.96906	-4.22213	2.3323	-1.81028	0.0702519	NA
B3GALT6	647.013	0.115864	0.157548	0.73542	0.462084	0.690909
B3GAT1	6.85058	0.771811	1.13133	0.682214	0.495104	NA
B3GAT2	65.9256	-0.0454849	0.377439	-0.120509	0.90408	NA
B3GAT3	3462.21	-0.133736	0.123736	-1.08081	0.279781	0.525415
B3GLCT	435.61	0.311835	0.162204	1.92249	0.0545446	0.207148
B3GNT2	279.407	0.344471	0.189688	1.81599	0.0693722	0.237505
B3GNT3	7.13542	-1.05441	1.14734	-0.919009	0.358091	NA
B3GNT4	79.7118	-0.0300409	0.355438	-0.0845182	0.932644	NA
B3GNT5	157.067	0.569098	0.408935	1.39166	0.164026	0.39037
B3GNT7	2.20842	-0.993787	2.72186	-0.365113	0.715027	NA
B3GNT8	19.9562	-1.67734	0.736948	-2.27606	0.0228422	NA
B3GNT9	25.3087	-0.0321749	0.787221	-0.0408715	0.967398	NA
B3GNTL1	297.981	0.223535	0.166058	1.34612	0.178263	0.410632
B4GALNT1	808.021	-0.299843	0.127856	-2.34517	0.0190183	0.113937
B4GALNT3	938.524	-0.072797	0.131533	-0.553452	0.579954	0.772285
B4GALNT4	266.389	-0.226191	0.209627	-1.07902	0.28058	0.526175
B4GALT1	539.357	0.0777691	0.170908	0.455034	0.649084	0.820119
B4GALT1-AS1	5.22544	-3.36627	1.91467	-1.75815	0.0787228	NA
B4GALT2	4899.28	-0.380147	0.124929	-3.04291	0.00234303	0.0311763
B4GALT3	3947.65	0.000591697	0.0997008	0.00593472	0.995265	0.997675
B4GALT4	721.22	0.0221755	0.12835	0.172774	0.862829	0.937964
B4GALT4-AS1	21.884	-0.476377	0.542559	-0.878019	0.379933	NA
B4GALT5	738.238	0.263764	0.165659	1.59221	0.111337	0.312953
B4GALT6	553.201	0.130508	0.167133	0.780867	0.434881	0.669073
B4GALT7	1168.58	-0.140761	0.123144	-1.14306	0.253014	0.496279
B4GAT1	3308.37	-0.171971	0.0784287	-2.19271	0.0283286	0.143824
B9D1	906.341	-0.1055	0.120437	-0.875977	0.381042	0.623146
B9D2	64.3866	-0.0547388	0.366517	-0.149349	0.881279	NA
BAALC	12.378	0.0277112	1.24815	0.0222019	0.982287	NA
BAALC-AS1	1.59944	0	3.17206	0	1	NA
BAALC-AS2	0.974469	-0.017995	3.57046	-0.00503995	0.995979	NA
BAAT	5.8403	0.363808	1.39375	0.261028	0.794071	NA
BABAM1	3514.49	-0.219902	0.103259	-2.12961	0.0332035	0.15674
BACE1	488.684	0.045888	0.189695	0.241904	0.808854	0.910682
BACE1-AS	53.6154	-0.0342392	0.484714	-0.0706381	0.943686	NA
BACE2	849.656	-0.109745	0.136423	-0.804451	0.421136	0.657878
BACH1	548.653	0.421797	0.149282	2.82551	0.00472055	0.0480136
BACH2	102.657	-0.0340923	0.286201	-0.11912	0.90518	0.958176
BAD	1023.92	-0.252989	0.129108	-1.95951	0.0500528	0.197109
BAG1	1190.25	0.265497	0.125957	2.10785	0.0350442	0.160903
BAG2	852.804	0.369793	0.163719	2.25871	0.0239011	0.130601
BAG3	6400.47	0.391063	0.0992258	3.94114	8.10952e-05	0.00299478
BAG4	1507.83	-0.201402	0.134248	-1.50022	0.133557	0.348619
BAG5	585.126	0.355653	0.201914	1.76141	0.0781698	0.254184
BAG6	24648.7	-0.16695	0.0926794	-1.80137	0.071644	0.242013
BAGE2	2.27615	1.04827	2.64155	0.396837	0.691488	NA
BAHCC1	1288.1	-0.339141	0.147952	-2.29223	0.0218921	0.123821
BAHD1	3030.26	-0.103081	0.0946308	-1.0893	0.276021	0.520525
BAIAP2	1834.13	-0.0943238	0.0957546	-0.985058	0.324596	0.572238
BAIAP2-AS1	503.558	-0.251695	0.173052	-1.45445	0.145821	0.36696
BAIAP2L1	1647.87	0.170587	0.122549	1.39199	0.163926	0.390312
BAIAP2L2	15.5311	0.047405	0.704196	0.0673179	0.946329	NA
BAIAP3	56.1747	-0.907864	0.668569	-1.35792	0.174489	NA
BAK1	521.582	-0.0809409	0.127636	-0.634153	0.525981	0.736664
BAMBI	415.383	0.133529	0.175266	0.761863	0.446142	0.676625
BANF1	1529.53	-0.13304	0.106797	-1.24572	0.212867	0.452743
BANP	995.213	0.171056	0.117215	1.45934	0.144472	0.364889
BAP1	6482.56	-0.0966971	0.0570251	-1.69569	0.0899439	0.275525
BARD1	705.988	0.118924	0.160274	0.742003	0.458086	0.687587
BARHL2	278.971	-0.450947	0.211788	-2.12924	0.0332346	0.156793
BARX1	255.754	0.0273096	0.226338	0.120659	0.903962	0.957661
BARX2	482.471	-0.405485	0.19204	-2.11146	0.0347331	0.160179
BASP1	655.788	-0.591273	0.174041	-3.39731	0.000680513	0.0135899
BATF2	9.24004	-0.72401	1.03018	-0.7028	0.48218	NA
BATF3	169.931	-0.286728	0.26668	-1.07518	0.282295	0.528333
BAX	2531.89	-0.25113	0.0950523	-2.64202	0.00824136	0.0679346
BAZ1A	7162.72	0.00607108	0.106681	0.0569086	0.954618	0.980583
BAZ1B	7878.76	0.148383	0.0921963	1.60942	0.107524	0.306751
BAZ2A	9445.37	-0.167286	0.118916	-1.40676	0.159499	0.384091
BAZ2B	623.391	0.108662	0.183164	0.593248	0.553015	0.753809
BBC3	159.978	-0.311535	0.282062	-1.10449	0.269381	0.513762
BBIP1	493.353	0.134404	0.208377	0.645005	0.518924	0.732462
BBOF1	64.0724	0.706058	0.437515	1.61379	0.106572	NA
BBOX1	0.876911	1.7859	4.65732	0.383461	0.701378	NA
BBOX1-AS1	71.3365	0.197267	0.425074	0.464078	0.642592	NA
BBS1	750.434	-0.0823504	0.135384	-0.608273	0.543006	0.746867
BBS10	467.747	-0.0101657	0.153826	-0.0660855	0.94731	0.977093
BBS12	137.218	-0.265979	0.30595	-0.869356	0.384653	0.626065
BBS2	1211.27	0.0864882	0.113387	0.762772	0.4456	0.676321
BBS4	1399.8	-0.193715	0.100568	-1.92622	0.0540774	0.206409
BBS5	142.207	-0.412445	0.345614	-1.19337	0.232725	0.476202
BBS7	1520.93	0.369748	0.147983	2.49858	0.0124691	0.0892451
BBS9	395.077	0.384106	0.189231	2.02983	0.0423737	0.179711
BBX	1383.17	0.0782576	0.138834	0.563679	0.572973	0.767673
BCAM	590.479	-0.698786	0.212907	-3.28212	0.00103028	0.0180204
BCAN	4.5017	0.755645	1.76652	0.42776	0.668826	NA
BCAP29	1512.12	0.133875	0.0947371	1.41312	0.15762	0.38148
BCAP31	9892.86	-0.106328	0.119076	-0.892947	0.371886	0.615447
BCAR1	3601.73	-0.244116	0.144128	-1.69374	0.0903145	0.276302
BCAR3	381.423	-0.11698	0.164104	-0.712843	0.475943	0.701069
BCAR4	0.376621	0	6.66256	0	1	NA
BCAS1	3.1907	-1.0333	1.7394	-0.594054	0.552476	NA
BCAS2	3169.91	0.193294	0.113425	1.70415	0.0883539	0.272719
BCAS3	1958.66	0.0241639	0.10033	0.240844	0.809676	0.911009
BCAS4	247.701	0.117467	0.200387	0.5862	0.557741	0.757326
BCAT1	2168.05	0.285204	0.106938	2.66701	0.0076529	0.0652344
BCAT2	2148.36	-0.282448	0.0754734	-3.74236	0.000182301	0.00521107
BCCIP	5439.36	0.127072	0.120787	1.05204	0.292782	0.538953
BCDIN3D	284.887	-0.144524	0.217865	-0.663364	0.507098	0.723964
BCDIN3D-AS1	60.3466	0.245515	0.312472	0.785717	0.432033	NA
BCHE	80.0553	-0.054866	0.41174	-0.133254	0.893992	NA
BCKDHA	2367.4	-0.208563	0.100187	-2.08175	0.0373655	0.167211
BCKDHB	837.908	0.0190572	0.149681	0.127319	0.898688	0.955836
BCKDK	4692.24	-0.137489	0.107656	-1.27711	0.201562	0.440004
BCL10	274.964	-0.187361	0.250429	-0.748158	0.454365	0.684484
BCL11A	504.407	-0.152525	0.175763	-0.867788	0.38551	0.626951
BCL11B	8.78119	-0.547799	1.10468	-0.495891	0.619971	NA
BCL2	80.5355	0.6585	0.465275	1.41529	0.156983	NA
BCL2L1	1526.25	-0.348371	0.16456	-2.11698	0.0342613	0.158889
BCL2L11	1066.96	0.157646	0.12282	1.28355	0.1993	0.437224
BCL2L12	2224.41	-0.239198	0.107385	-2.22749	0.0259145	0.136654
BCL2L13	2934.42	0.157692	0.0875686	1.80079	0.0717367	0.242122
BCL2L14	0.637064	0	6.66256	0	1	NA
BCL2L15	0.630625	-0.993795	5.55372	-0.178942	0.857983	NA
BCL2L2	90.5586	0.196261	0.268992	0.729617	0.465625	0.693697
BCL2L2-PABPN1	41.9862	0.0838311	0.32883	0.254938	0.798771	NA
BCL3	67.75	-0.927589	0.308057	-3.0111	0.00260302	NA
BCL6	404.499	-0.0284847	0.194508	-0.146445	0.88357	0.949473
BCL6B	718.442	-0.268535	0.14829	-1.81088	0.07016	0.23895
BCL7A	378.443	0.111009	0.162951	0.681238	0.495721	0.715359
BCL7B	2684.69	-0.0157624	0.104889	-0.150277	0.880546	0.947741
BCL7C	3378.65	-0.0647214	0.108839	-0.594651	0.552077	0.752965
BCL9	3381.41	-0.250918	0.126465	-1.9841	0.0472446	0.190342
BCL9L	807.417	-0.614909	0.16818	-3.65626	0.000255925	0.00670657
BCLAF1	18678.2	0.15602	0.0863308	1.80723	0.0707262	0.240061
BCO1	1.38288	0.0410801	3.94339	0.0104174	0.991688	NA
BCO2	12.94	0.999567	1.05934	0.943575	0.345387	NA
BCOR	11141	-0.0506272	0.0951376	-0.532147	0.594624	0.78334
BCORL1	3204.04	-0.162686	0.137828	-1.18036	0.237858	0.48125
BCR	5662.78	-0.0573035	0.0769458	-0.744725	0.456438	0.686057
BCS1L	2881.87	-0.0996827	0.0957869	-1.04067	0.298028	0.544424
BCYRN1	59756.7	-1.06047	0.39897	-2.65801	0.00786041	0.0659725
BDH1	172.441	-0.318193	0.243321	-1.30771	0.190973	0.426746
BDH2	173.141	0.12773	0.239506	0.533305	0.593822	0.782746
BDKRB2	2.21353	0.252727	1.99701	0.126553	0.899294	NA
BDNF	3.84309	-1.82156	1.58327	-1.1505	0.249937	NA
BDNF-AS	19.4338	0.0090376	0.805431	0.0112208	0.991047	NA
BDP1	2250.04	0.318202	0.180927	1.75873	0.078623	0.255174
BEAN1	9.40459	-0.450662	1.14387	-0.393979	0.693596	NA
BECN1	1544.64	0.356919	0.105454	3.3846	0.000712812	0.0140249
BEGAIN	38.4941	-0.733594	0.622634	-1.17821	0.238713	NA
BEND2	0.442372	-3.44555	6.58461	-0.523273	0.600784	NA
BEND3	298.29	0.0042574	0.183662	0.0231807	0.981506	0.992476
BEND4	323.694	0.142558	0.277969	0.512858	0.608051	0.79123
BEND5	33.8534	0.303697	0.559522	0.54278	0.587281	NA
BEND6	148.531	0.0182834	0.259364	0.0704932	0.943801	0.975622
BEND7	902.057	0.127668	0.135467	0.942433	0.345971	0.592092
BEST1	36.9176	0.0950752	0.614244	0.154784	0.876991	NA
BEST2	2.04313	-0.0445592	2.87097	-0.0155206	0.987617	NA
BEST3	2.05603	0.0120454	2.7719	0.00434552	0.996533	NA
BEST4	3.23372	-0.433245	1.77819	-0.243643	0.807507	NA
BET1	475.349	0.370633	0.185565	1.99732	0.04579	0.188164
BET1L	97.4402	0.157576	0.249477	0.631626	0.527632	0.73713
BEX1	370.414	0.173053	0.194855	0.88811	0.374482	0.617989
BEX2	830.661	0.450456	0.235221	1.91503	0.0554881	0.209292
BEX3	4750.07	-0.0815363	0.0867219	-0.940204	0.347113	0.593454
BEX4	999.429	0.00629104	0.111797	0.0562719	0.955125	0.980701
BEX5	35.6802	0.549856	0.467506	1.17615	0.239537	NA
BFAR	2111.97	-0.132201	0.104234	-1.26832	0.204684	0.443883
BFSP1	163.624	-0.108855	0.26879	-0.404982	0.685491	0.839088
BGLAP	52.1432	-0.596989	0.506376	-1.17894	0.23842	NA
BGN	2.92758	3.80224	2.43768	1.55977	0.118813	NA
BHLHA15	14.6461	1.55227	1.06992	1.45083	0.146828	NA
BHLHB9	164.77	0.212711	0.2683	0.79281	0.427889	0.664362
BHLHE22	13.4892	-0.838316	0.962632	-0.870858	0.383832	NA
BHLHE23	3.70301	0.500467	1.6681	0.300022	0.764161	NA
BHLHE40	482.382	-0.7211	0.222151	-3.24599	0.00117041	0.0196466
BHLHE40-AS1	2.97257	-2.81136	2.04107	-1.37739	0.168391	NA
BHLHE41	81.2136	-0.31841	0.336342	-0.946686	0.343799	0.590311
BHMG1	36.1407	0.297251	0.637054	0.466602	0.640785	NA
BHMT	2.04609	-1.88356	2.51577	-0.748702	0.454037	NA
BICC1	541.549	-0.203291	0.196163	-1.03633	0.300047	0.54621
BICD1	499.316	0.0831938	0.161052	0.516565	0.60546	0.790033
BICD2	1501.59	0.179187	0.100075	1.79053	0.0733687	0.245157
BICDL1	89.5488	-0.168346	0.324137	-0.519367	0.603505	0.788356
BICDL2	29.7308	-0.504918	0.746903	-0.676015	0.499031	NA
BID	903.453	-0.459867	0.122796	-3.74496	0.000180422	0.00521107
BIK	14.9227	-0.74888	1.00903	-0.742178	0.457979	NA
BIN1	1090.93	-0.263433	0.105074	-2.50713	0.0121717	0.0875808
BIN2	0.508141	-1.86247	5.77693	-0.322397	0.747152	NA
BIN3	600.965	0.0706492	0.118163	0.597893	0.549911	0.751284
BIN3-IT1	0.983883	0.0583204	4.70412	0.0123977	0.990108	NA
BIRC2	769.401	0.139929	0.131875	1.06107	0.288659	0.534761
BIRC3	5.16544	0.330472	1.35291	0.244267	0.807024	NA
BIRC5	14769.5	-0.475746	0.109022	-4.36375	1.27854e-05	0.000755913
BIRC6	5283.88	0.26224	0.103842	2.52538	0.0115573	0.0848384
BIRC8	0.325656	-4.18399	6.57385	-0.63646	0.524477	NA
BISPR	2.41088	-0.0452925	2.24178	-0.0202038	0.983881	NA
BIVM	355.786	0.425893	0.18163	2.34483	0.0190357	0.113948
BIVM-ERCC5	135.799	0.261156	0.354619	0.73644	0.461463	0.690401
BLACAT1	0.372902	0	6.66256	0	1	NA
BLCAP	236.318	0.142862	0.249583	0.572403	0.567049	0.763948
BLK	0.812338	3.41689	3.93704	0.867881	0.385459	NA
BLM	3746.88	0.155665	0.0654543	2.37823	0.0173961	0.108237
BLMH	2464.64	0.140817	0.100133	1.4063	0.159636	0.384311
BLNK	2.03898	-0.894887	1.81747	-0.49238	0.622451	NA
BLOC1S1	872.665	0.0129312	0.454936	0.0284242	0.977324	0.990407
BLOC1S1-RDH5	932.004	-0.467474	0.515587	-0.906683	0.364574	0.609164
BLOC1S2	686.406	0.254368	0.182454	1.39414	0.163274	0.389508
BLOC1S3	194.796	0.120914	0.23803	0.50798	0.611467	0.793988
BLOC1S4	352.37	0.254899	0.233765	1.09041	0.275533	0.520092
BLOC1S5-TXNDC5	12229.6	0.466349	0.0513476	9.0822	1.06403e-19	6.72134e-17
BLOC1S6	1373.42	0.251377	0.104443	2.40683	0.0160915	0.103833
BLVRA	812.143	-0.134339	0.136648	-0.983103	0.325557	0.573175
BLVRB	829.18	-0.192208	0.182079	-1.05563	0.291137	0.537573
BLZF1	888.66	0.29679	0.114721	2.58707	0.00967962	0.0758817
BMF	14.8727	-2.29544	0.793932	-2.89122	0.00383744	NA
BMI1	2.9318	0	6.66256	0	NA	NA
BMP1	942.085	-0.252493	0.119154	-2.11904	0.0340869	0.158412
BMP2	288.528	-0.0149704	0.191368	-0.0782284	0.937646	0.972531
BMP2K	1120.44	-0.183589	0.14544	-1.2623	0.206841	0.4464
BMP3	4.81789	-2.14675	1.59829	-1.34316	0.179221	NA
BMP4	369.581	-0.404533	0.161217	-2.50924	0.0120991	0.087268
BMP5	4.74789	-3.23576	2.11695	-1.5285	0.126387	NA
BMP6	173.137	-0.103782	0.21071	-0.492535	0.622341	0.802292
BMP7	2577.85	-0.137004	0.0993008	-1.37968	0.167684	0.396014
BMP8A	79.075	-0.0748066	0.300162	-0.24922	0.80319	NA
BMP8B	162.557	0.0312552	0.272136	0.114851	0.908563	0.95891
BMPER	44.1737	0.701697	0.43444	1.61518	0.106272	NA
BMPR1A	278.368	0.166663	0.238018	0.700212	0.483795	0.707233
BMPR1B	61.1622	0.291425	0.429578	0.678398	0.497519	NA
BMPR1B-AS1	1.59806	-0.462824	3.64061	-0.127128	0.898839	NA
BMPR2	1111.91	0.0946247	0.15904	0.594973	0.551862	0.752835
BMS1	8497.25	0.187272	0.0875106	2.13999	0.0323553	0.154764
BMT2	165.478	0.269094	0.219833	1.22408	0.220921	0.46371
BMX	0.687359	0	5.81886	0	1	NA
BNC1	77.4487	0.267785	0.347618	0.770343	0.441096	NA
BNC2	188.568	0.191446	0.243979	0.78468	0.432641	0.66751
BNIP1	571.629	-0.0640021	0.141377	-0.452705	0.650761	0.821108
BNIP2	948.989	0.471274	0.172697	2.72891	0.0063545	0.0577315
BNIP3	1094.14	0.00815571	0.12313	0.0662366	0.947189	0.977093
BNIP3L	666.884	-0.0138416	0.146817	-0.094278	0.924888	0.966607
BNIPL	17.9509	-1.481	0.851835	-1.7386	0.0821045	NA
BOC	515.713	-0.192591	0.18095	-1.06433	0.287179	0.533466
BOD1	3707.69	0.103231	0.10554	0.978124	0.328013	0.575228
BOD1L1	2028.79	0.264387	0.128971	2.04997	0.0403671	0.174671
BOD1L2	27.933	-0.0217815	0.532151	-0.040931	0.967351	NA
BOK	9.91319	-0.762537	0.903121	-0.844336	0.398482	NA
BOK-AS1	1.02383	-1.50002	4.0627	-0.369218	0.711965	NA
BOLA1	277.716	-0.0133799	0.254539	-0.0525653	0.958078	0.981732
BOLA2	3829.35	-0.145429	0.135239	-1.07535	0.282218	0.528333
BOLA2-SMG1P6	2448.54	-0.228665	0.101811	-2.24598	0.0247055	0.132847
BOLA2B	2398.74	-0.318804	0.112775	-2.8269	0.00470005	0.0478826
BOLA3	2881.21	-0.298776	0.0864471	-3.45617	0.000547908	0.0116389
BOLA3-AS1	430.244	-0.338505	0.224331	-1.50895	0.131311	0.345125
BOLL	0.440131	-3.72745	6.57984	-0.566495	0.571057	NA
BOP1	13125	-0.305229	0.081992	-3.72267	0.00019713	0.00547675
BORA	1751.15	0.332257	0.101921	3.25996	0.00111427	0.0190777
BORCS5	168.296	0.306626	0.277837	1.10362	0.269759	0.513994
BORCS6	290.757	0.149882	0.213242	0.702873	0.482135	0.705714
BORCS7-ASMT	465.77	-0.0518368	0.191779	-0.270295	0.786933	0.898134
BORCS8	545.416	-0.134247	0.157331	-0.853277	0.393506	0.635134
BORCS8-MEF2B	308.083	-0.695428	0.184678	-3.76562	0.000166137	0.00489922
BPGM	409.722	0.337824	0.162433	2.07978	0.0375462	0.167631
BPHL	668.531	0.091778	0.178932	0.512922	0.608006	0.79123
BPIFA2	0.678529	0	6.66256	0	1	NA
BPIFB1	0.389415	0	6.66256	0	1	NA
BPIFC	0.4056	0	6.66256	0	1	NA
BPNT1	1656.99	0.0659068	0.124365	0.529945	0.59615	0.784242
BPTF	9895.62	-0.0297908	0.098235	-0.303261	0.761691	0.883524
BRAF	1426.19	-0.038474	0.0962718	-0.39964	0.689422	0.840555
BRAP	1334.54	0.307883	0.111194	2.76888	0.00562491	0.053793
BRAT1	4020.26	-0.135764	0.0775427	-1.75083	0.0799749	0.257335
BRCA1	3853.3	0.192704	0.107161	1.79827	0.0721343	0.242911
BRCA2	1770	0.273396	0.115832	2.36029	0.0182609	0.111597
BRCAT54	13.108	0.633598	1.02766	0.616547	0.537534	NA
BRCC3	612.821	0.104945	0.176088	0.595979	0.55119	0.75226
BRD1	2211.04	0.136395	0.0979998	1.39179	0.163986	0.390353
BRD2	40487.1	0.00632336	0.0953818	0.0662952	0.947143	0.977093
BRD3	2321.64	-0.178429	0.125694	-1.41955	0.155738	0.379619
BRD4	5507.09	-0.287808	0.10482	-2.74575	0.00603727	0.0561265
BRD7	3512.91	0.163561	0.0946	1.72897	0.0838143	0.264894
BRD8	4335.76	-0.173659	0.104468	-1.66232	0.0964488	0.288026
BRD9	1087.71	0.157844	0.117888	1.33894	0.180591	0.414348
BRE	2562.7	0.0148872	0.117716	0.126468	0.899362	0.955836
BRE-AS1	70.6968	0.354906	0.351467	1.00978	0.312599	NA
BREA2	4.72262	0.190364	1.32839	0.143304	0.88605	NA
BRF1	1317.93	0.145487	0.11252	1.29299	0.196013	0.4333
BRF2	295.544	-0.118365	0.179967	-0.657707	0.510726	0.72654
BRI3	1652.29	-0.433828	0.170225	-2.54855	0.0108172	0.0813015
BRI3BP	857.105	0.00360308	0.135925	0.0265079	0.978852	0.991408
BRICD5	73.2339	0.17021	0.371205	0.458533	0.646569	NA
BRINP2	3.67473	1.54931	2.47865	0.625063	0.53193	NA
BRINP3	83.773	0.0993496	0.385185	0.257927	0.796463	0.903426
BRIP1	1376.32	0.414459	0.140186	2.95648	0.0031117	0.0371978
BRIX1	3537.47	0.269602	0.11465	2.35152	0.018697	0.113106
BRK1	1544.34	-0.0619108	0.0986721	-0.627439	0.530371	0.738369
BRMS1	1745.61	0.0616546	0.123463	0.499376	0.617514	0.79803
BRMS1L	488.182	0.0906799	0.162767	0.557115	0.577449	0.770659
BROX	1985.58	0.0728445	0.113405	0.642339	0.520653	0.733672
BRPF1	3523.55	0.0494051	0.0673998	0.733015	0.463549	0.69171
BRPF3	6631.27	-0.0198136	0.0928052	-0.213497	0.83094	0.921458
BRSK1	251.134	0.149711	0.239056	0.626258	0.531146	0.738562
BRSK2	1528.93	-0.250023	0.120566	-2.07375	0.0381025	0.169247
BRWD1	696.091	0.113672	0.183058	0.620962	0.534624	0.741199
BRWD1-AS1	0.377499	-0.993727	6.66256	-0.149151	0.881435	NA
BRWD1-IT2	12.7985	-0.488315	0.746867	-0.653818	0.513229	NA
BRWD3	1058.68	0.179614	0.144651	1.24171	0.214345	0.454598
BSCL2	876.377	-0.440452	0.384017	-1.14696	0.251398	0.494961
BSDC1	4024.99	-0.0516554	0.113929	-0.453399	0.650262	0.821037
BSG	14736.1	-0.087415	0.106672	-0.819478	0.412514	0.650419
BSN	959.788	0.0340052	0.144061	0.236048	0.813396	0.912536
BSN-AS2	4.12908	-0.265377	1.9341	-0.13721	0.890865	NA
BSND	0.295091	0	6.66256	0	1	NA
BSPRY	22.2318	-0.42468	0.666092	-0.63757	0.523753	NA
BST1	21.219	-0.740736	0.797286	-0.929071	0.352852	NA
BST2	1.48421	-3.19938	3.27192	-0.977828	0.328159	NA
BTAF1	3059.18	0.357243	0.110343	3.23758	0.0012055	0.0200393
BTBD1	5812.91	0.216734	0.0947876	2.28652	0.0222239	0.125329
BTBD10	1034.6	0.180531	0.12726	1.4186	0.156015	0.379971
BTBD11	366.615	-0.442391	0.210411	-2.10251	0.0355087	0.162301
BTBD16	1.52977	4.27344	3.70464	1.15354	0.24869	NA
BTBD17	2.33783	-1.9725	2.30601	-0.855374	0.392344	NA
BTBD18	0.676407	0.954919	4.81852	0.198177	0.842907	NA
BTBD19	4.35039	-1.23336	1.34564	-0.916563	0.359372	NA
BTBD2	3708.59	-0.119065	0.100815	-1.18102	0.237593	0.480795
BTBD3	1301.25	-0.0415267	0.1429	-0.2906	0.771357	0.888737
BTBD6	1765.66	-0.00557338	0.121849	-0.0457399	0.963518	0.983579
BTBD7	1124.64	-0.087126	0.13777	-0.632403	0.527123	0.737037
BTBD8	9.3839	-0.811279	1.0885	-0.745317	0.45608	NA
BTBD9	182.749	0.571803	0.242012	2.3627	0.0181421	0.111093
BTD	419.671	-0.254879	0.155614	-1.63789	0.101445	0.296094
BTF3	28631.6	0.0722391	0.0752054	0.960556	0.336775	0.583371
BTF3L4	167.056	0.182662	0.235919	0.774257	0.438779	0.671541
BTG1	345.98	-0.0523048	0.189859	-0.275493	0.782937	0.895902
BTG2	249.981	-0.17869	0.270203	-0.661315	0.50841	0.72504
BTG3	784.476	0.134989	0.134664	1.00241	0.316144	0.563798
BTG4	0.935218	0	6.66256	0	1	NA
BTK	7.07517	-1.27599	1.4022	-0.909992	0.362827	NA
BTN1A1	1.1835	-3.08466	3.17586	-0.971283	0.331408	NA
BTN2A1	688.568	0.403313	0.179868	2.24227	0.0249438	0.133481
BTN2A2	380.439	0.19522	0.17419	1.12073	0.262403	0.506654
BTN3A1	121.855	0.0100769	0.266729	0.0377794	0.969864	0.986383
BTN3A2	71.9508	0.379504	0.537743	0.705735	0.480353	NA
BTN3A3	29.2908	-0.307422	0.673814	-0.456242	0.648216	NA
BTNL10	3.77912	0.294108	2.09871	0.140138	0.888551	NA
BTNL9	80.4188	-0.685221	0.358556	-1.91106	0.0559971	NA
BTRC	2217.24	0.168716	0.0909461	1.85512	0.0635792	0.2265
BUB1	7199.69	0.122077	0.075056	1.62648	0.103847	0.300402
BUB1B	4136.43	0.0863828	0.100284	0.861381	0.389028	0.63085
BUB1B-PAK6	4.02275	1.31864	1.46092	0.902607	0.366735	NA
BUB3	7157.2	0.0540178	0.0797759	0.677119	0.49833	0.717744
BUD13	1891.01	-0.175412	0.105895	-1.65647	0.0976258	0.290157
BUD31	1790.17	0.359284	0.167078	2.15039	0.0315243	0.152501
BVES	131.591	0.572123	0.364755	1.56851	0.116761	0.322006
BVES-AS1	14.4566	-0.152742	0.749551	-0.203778	0.838527	NA
BYSL	3303.09	0.0131887	0.102588	0.128561	0.897705	0.955419
BZRAP1-AS1	17.6783	-2.30781	0.78527	-2.93888	0.00329405	NA
BZW1	1541.61	0.378935	0.161767	2.34248	0.0191561	0.114179
BZW2	4116.06	0.085977	0.0688926	1.24799	0.212036	0.452259
C10orf10	34.0959	0.1433	0.495428	0.289244	0.772394	NA
C10orf105	0.650095	4.21722	6.57273	0.641624	0.521118	NA
C10orf107	7.35728	-1.60884	1.31913	-1.21962	0.222608	NA
C10orf11	10.813	0.936664	1.08525	0.863085	0.38809	NA
C10orf111	3.74002	-0.619959	1.4446	-0.429157	0.667809	NA
C10orf12	471.985	0.225184	0.157282	1.43172	0.152223	0.375558
C10orf131	5.98742	0.412815	1.33236	0.309838	0.756684	NA
C10orf2	1827.52	-0.0926505	0.104708	-0.884844	0.376241	0.61937
C10orf25	26.7615	-0.334579	0.551618	-0.606542	0.544155	NA
C10orf35	139.502	-0.0903297	0.239839	-0.376626	0.706451	0.849321
C10orf54	17.5087	0.3841	0.861829	0.44568	0.655829	NA
C10orf62	0.34179	-1.86189	6.63804	-0.280488	0.779103	NA
C10orf67	2.30225	3.86851	2.66754	1.45021	0.146999	NA
C10orf71	0.330074	0	6.66256	0	1	NA
C10orf76	1438.61	0.178193	0.0987886	1.80379	0.0712649	0.241139
C10orf82	60.4531	-0.289535	0.412811	-0.701375	0.483069	NA
C10orf88	431.442	0.071276	0.16377	0.435219	0.663403	0.827693
C10orf91	0.994013	-1.96394	4.44182	-0.442147	0.658383	NA
C10orf95	19.2191	-0.791756	0.735852	-1.07597	0.28194	NA
C10orf99	0.360789	0	6.66256	0	1	NA
C11orf1	613.418	-0.0494441	0.154438	-0.320154	0.748851	0.874896
C11orf16	1.55556	2.38979	2.7381	0.872793	0.382776	NA
C11orf24	2600.58	-0.414681	0.140258	-2.95655	0.00311099	0.0371978
C11orf31	1504.22	-0.0559708	0.139147	-0.402242	0.687506	0.839678
C11orf42	0.820759	-3.2349	3.69024	-0.876611	0.380698	NA
C11orf45	87.9052	-1.11214	0.379479	-2.93071	0.00338188	0.0389533
C11orf49	1165.23	0.100492	0.108348	0.927489	0.353673	0.598848
C11orf52	1.04366	-2.46544	5.58749	-0.441244	0.659036	NA
C11orf54	230.981	0.362926	0.206936	1.7538	0.0794639	0.256531
C11orf57	2453.04	0.0733298	0.122369	0.599253	0.549004	0.75094
C11orf58	3981.69	0.210005	0.102717	2.04451	0.0409034	0.175895
C11orf63	166.61	-0.0539461	0.279712	-0.192863	0.847066	0.928871
C11orf65	35.7616	0.295726	0.760524	0.388845	0.697391	NA
C11orf68	353.6	-0.343096	0.182806	-1.87683	0.060541	0.220457
C11orf70	38.6044	-0.792175	0.483366	-1.63887	0.10124	NA
C11orf71	64.2814	-0.492423	0.471242	-1.04495	0.296047	NA
C11orf72	3.10991	-2.53259	1.72816	-1.46549	0.142788	NA
C11orf73	1237.56	0.188262	0.134442	1.40032	0.161416	0.386657
C11orf74	984.994	0.0384518	0.130595	0.294436	0.768425	0.887303
C11orf80	293.929	0.000888584	0.190372	0.00466763	0.996276	0.998105
C11orf84	5659.78	-0.415923	0.0895584	-4.64416	3.41461e-06	0.000264891
C11orf91	0.458883	1.84679	5.44806	0.338981	0.734624	NA
C11orf94	6.11132	-0.34465	1.22263	-0.281892	0.778026	NA
C11orf95	423.323	-0.191654	0.15227	-1.25865	0.208157	0.447665
C11orf96	19.7293	0.193319	0.822463	0.235049	0.814171	NA
C11orf98	3031.76	-0.177601	0.118928	-1.49335	0.135345	0.351832
C12orf10	3576.46	-0.0073106	0.0874006	-0.0836447	0.933339	0.970403
C12orf29	1252.47	0.354728	0.165107	2.14848	0.0316759	0.152893
C12orf4	1167.08	-0.0374508	0.125189	-0.299154	0.764822	0.885871
C12orf43	2168.25	-0.146645	0.109838	-1.3351	0.181842	0.416027
C12orf45	757.913	0.156781	0.17254	0.908669	0.363525	0.608257
C12orf49	774.953	0.231244	0.123125	1.87811	0.0603655	0.220014
C12orf50	1.70151	-4.47915	5.98881	-0.74792	0.454508	NA
C12orf56	1.47734	-0.292219	3.87469	-0.0754172	0.939883	NA
C12orf57	1391.82	-0.0903228	0.11075	-0.815556	0.414754	0.652067
C12orf60	78.0398	0.16054	0.404225	0.397156	0.691253	NA
C12orf65	460.508	0.163606	0.179843	0.909716	0.362972	0.60784
C12orf66	273.576	0.245733	0.265432	0.925785	0.354557	0.599212
C12orf71	0.60336	0	6.66256	0	1	NA
C12orf73	397.969	-0.495889	0.212251	-2.33633	0.0194741	0.115478
C12orf75	375.664	0.241544	0.172615	1.39932	0.161716	0.387099
C12orf76	5.23691	-0.939682	1.30471	-0.720221	0.471389	NA
C14orf1	1748.73	-0.101529	0.124262	-0.817055	0.413897	0.651397
C14orf119	955.8	-0.171522	0.12178	-1.40847	0.158993	0.383487
C14orf132	43.8858	-0.576736	0.468	-1.23234	0.217821	NA
C14orf142	156.743	-0.376807	0.315068	-1.19595	0.231715	0.474832
C14orf159	188.436	-0.177073	0.287721	-0.615433	0.538269	0.743247
C14orf166	7110.59	0.271664	0.108315	2.50809	0.0121387	0.0874481
C14orf169	33.3413	-0.115083	0.628078	-0.18323	0.854618	NA
C14orf178	1.47737	-4.20816	2.65397	-1.58561	0.112828	NA
C14orf2	3256.21	0.0462537	0.145633	0.317604	0.750785	0.87672
C14orf28	80.5345	0.776867	0.473866	1.63942	0.101125	NA
C14orf37	274.96	-0.263709	0.212164	-1.24295	0.213886	0.453933
C14orf39	1.05688	-1.48598	4.44278	-0.33447	0.738025	NA
C14orf79	198.711	0.014477	0.279592	0.0517791	0.958705	0.981732
C14orf80	715.014	-0.0407013	0.121351	-0.335402	0.737322	0.867922
C14orf93	323.67	-0.183742	0.210044	-0.874782	0.381693	0.62353
C15orf38-AP3S2	192.885	0.31539	0.272554	1.15717	0.247205	0.490478
C15orf39	6087.45	-0.506195	0.113753	-4.44995	8.58898e-06	0.000548324
C15orf40	684.979	0.102113	0.14415	0.708378	0.478711	0.702862
C15orf41	402.639	-0.25661	0.179854	-1.42677	0.153648	0.377174
C15orf48	6.48039	0.721125	1.46321	0.492838	0.622127	NA
C15orf52	5.09208	-2.15639	1.62616	-1.32606	0.184819	NA
C15orf57	310.79	0.0852716	0.19537	0.436461	0.662502	0.827663
C15orf59	198.073	-0.556264	0.271718	-2.04721	0.0406377	0.175318
C15orf59-AS1	1.7182	0.320259	2.80953	0.11399	0.909246	NA
C15orf61	673.789	-0.10612	0.147661	-0.718678	0.472339	0.697691
C15orf62	6.06614	0.711204	1.31257	0.54184	0.587929	NA
C15orf65	56.8403	-0.16671	0.517769	-0.321977	0.74747	NA
C16orf13	5246.35	-0.29338	0.100737	-2.91233	0.00358749	0.0405968
C16orf45	19.5604	0.0235749	0.735594	0.0320487	0.974433	NA
C16orf46	63.9479	0.840459	0.336228	2.49967	0.0124308	NA
C16orf52	100.251	-0.0329959	0.34528	-0.0955628	0.923868	0.966119
C16orf58	3200.44	-0.356543	0.153996	-2.31527	0.0205983	0.119791
C16orf59	1420.59	-0.11478	0.111471	-1.02968	0.303159	0.549282
C16orf62	1782.05	0.123314	0.0981002	1.25702	0.208745	0.448071
C16orf70	1240.43	-0.20449	0.13789	-1.483	0.138076	0.355543
C16orf71	34.486	-0.1781	0.604951	-0.294404	0.76845	NA
C16orf72	1195.33	0.224021	0.123837	1.80901	0.0704496	0.239474
C16orf74	16.6611	-2.32118	0.711279	-3.26339	0.00110089	NA
C16orf86	16.3569	0.442808	0.967126	0.457859	0.647053	NA
C16orf87	586.623	-0.164333	0.1619	-1.01503	0.310092	0.557061
C16orf89	2.24838	-0.0498443	2.37092	-0.0210232	0.983227	NA
C16orf91	598.223	0.1745	0.147257	1.185	0.236016	0.479583
C16orf95	279.652	-0.14054	0.183386	-0.766364	0.44346	0.674918
C16orf96	27.0472	0.911395	0.547304	1.66525	0.0958637	NA
C17orf100	23.4047	0.0847253	0.563822	0.15027	0.880552	NA
C17orf105	0.676184	-0.993754	4.891	-0.20318	0.838994	NA
C17orf107	0.494216	0	6.66256	0	1	NA
C17orf47	0.727679	0.929686	4.78371	0.194344	0.845907	NA
C17orf50	0.52304	-1.88074	5.79505	-0.324543	0.745527	NA
C17orf51	983.99	0.316332	0.104842	3.01721	0.0025511	0.0329094
C17orf53	905.71	0.0533629	0.14039	0.380103	0.703869	0.848176
C17orf58	236.768	0.327441	0.19588	1.67164	0.0945952	0.284362
C17orf62	1616.56	0.169709	0.0960855	1.76623	0.0773578	0.253052
C17orf64	0.385151	0	6.66256	0	1	NA
C17orf67	71.3767	-0.231592	0.36036	-0.642669	0.520439	NA
C17orf74	3.06266	-1.99756	1.98324	-1.00722	0.313828	NA
C17orf75	662.365	0.0196222	0.170264	0.115245	0.908251	0.95891
C17orf80	2559.34	0.0285274	0.079449	0.359066	0.719546	0.857367
C17orf82	1.85033	-5.61325	3.12822	-1.79439	0.0727507	NA
C17orf89	2311.69	-0.150134	0.128145	-1.17159	0.24136	0.485145
C17orf96	409.476	-0.193632	0.196014	-0.987846	0.323228	0.571242
C17orf97	174.676	-0.369381	0.226606	-1.63006	0.103089	0.299002
C17orf98	0.959438	0	4.55121	0	1	NA
C18orf21	2773.23	-0.174716	0.102304	-1.70781	0.0876715	0.271684
C18orf25	114.798	0.209762	0.324642	0.646132	0.518194	0.73169
C18orf32	205.122	0.151439	0.263576	0.574556	0.565592	0.762295
C18orf54	882.593	0.0578154	0.150014	0.385399	0.699942	0.845992
C18orf61	1.77775	-0.62095	2.03756	-0.304752	0.760555	NA
C18orf65	5.57773	1.54867	1.61312	0.960046	0.337032	NA
C18orf8	1996.67	0.116096	0.0871563	1.33204	0.182846	0.417072
C19orf12	104.689	0.0273068	0.306495	0.0890936	0.929008	0.968634
C19orf18	0.620959	0	6.66256	0	1	NA
C19orf24	1665.06	-0.197242	0.157113	-1.25542	0.209327	0.448907
C19orf25	302.695	-0.163091	0.21352	-0.763822	0.444973	0.675936
C19orf33	1.80313	-3.24475	2.32861	-1.39343	0.163491	NA
C19orf38	27.2951	-0.477778	0.753479	-0.634096	0.526018	NA
C19orf43	4473.22	-0.043494	0.117087	-0.371467	0.71029	0.851331
C19orf44	2701.03	-0.181447	0.112234	-1.61668	0.105947	0.304279
C19orf45	46.2909	-0.174136	0.464398	-0.374972	0.707681	NA
C19orf47	2167.52	-0.211147	0.122042	-1.73012	0.0836091	0.264668
C19orf48	2416.03	-0.0459626	0.103945	-0.442182	0.658358	0.825578
C19orf52	510.938	0.0455401	0.15805	0.288138	0.773241	0.889954
C19orf53	6676.02	-0.667821	0.122774	-5.43942	5.34558e-08	6.97365e-06
C19orf54	2395.02	-0.333594	0.130099	-2.56415	0.010343	0.0790235
C19orf57	223.338	-0.413632	0.221967	-1.86348	0.0623944	0.22374
C19orf60	918.874	-0.262114	0.140956	-1.85954	0.0629503	0.225262
C19orf66	8.5771	-2.30404	1.16043	-1.9855	0.0470891	NA
C19orf67	0.539126	-1.92588	6.63457	-0.29028	0.771602	NA
C19orf68	202.024	-0.308594	0.234061	-1.31843	0.187358	0.422708
C19orf70	2777.37	-0.27826	0.118793	-2.34241	0.0191599	0.114179
C19orf71	32.2224	-0.904778	0.476063	-1.90054	0.057362	NA
C19orf73	8.2011	-0.924574	1.17434	-0.787313	0.431099	NA
C19orf81	98.4937	0.0375105	0.31509	0.119047	0.905238	0.958176
C19orf84	2.23661	-4.08114	2.57198	-1.58677	0.112565	NA
C1D	225.656	-0.523815	0.176368	-2.97001	0.00297794	0.0363224
C1GALT1	324.991	0.291023	0.216774	1.34252	0.179429	0.41247
C1GALT1C1	885.729	0.265515	0.11327	2.34408	0.0190743	0.11402
C1GALT1C1L	45.9954	-0.433831	0.469431	-0.924165	0.3554	NA
C1orf100	1.2654	0.139401	3.70955	0.037579	0.970023	NA
C1orf101	16.8583	-0.45889	0.965427	-0.475323	0.634557	NA
C1orf106	74.9278	-1.42918	0.498469	-2.86714	0.00414204	NA
C1orf109	772.197	0.242963	0.122496	1.98344	0.0473182	0.190481
C1orf111	0.35466	-1.52815	6.42562	-0.237821	0.81202	NA
C1orf112	1512.67	-0.0628221	0.101065	-0.621599	0.534206	0.740875
C1orf115	88.5999	0.206036	0.289373	0.712009	0.476459	0.701314
C1orf116	7.70798	-1.04361	1.19474	-0.873507	0.382387	NA
C1orf122	1899.32	-0.109842	0.134335	-0.817673	0.413544	0.651345
C1orf123	516.984	0.0520888	0.141095	0.369175	0.711997	0.852323
C1orf127	4.48173	2.09813	2.30133	0.911702	0.361925	NA
C1orf131	1508.73	0.208198	0.189961	1.096	0.273078	0.51728
C1orf132	4.33898	-0.890278	2.31153	-0.385147	0.700128	NA
C1orf140	1.4317	0	6.66256	0	1	NA
C1orf145	15.7718	0.37885	1.0572	0.358352	0.72008	NA
C1orf146	2.80756	-1.77691	6.52174	-0.27246	0.785268	NA
C1orf159	1495.8	-0.174035	0.120149	-1.44849	0.147479	0.369298
C1orf162	9.74802	-0.199741	1.01892	-0.196032	0.844585	NA
C1orf167	122.578	-0.0469501	0.268259	-0.175018	0.861066	0.936934
C1orf168	0.92162	2.89187	4.19255	0.689763	0.490343	NA
C1orf174	423.94	0.137427	0.18594	0.73909	0.459852	0.688946
C1orf189	4.33974	-0.410501	1.51927	-0.270196	0.787009	NA
C1orf194	0.351665	-0.0319016	6.66256	-0.00478818	0.99618	NA
C1orf198	592.024	-0.0302562	0.144436	-0.209478	0.834075	0.923399
C1orf204	0.595773	3.62253	6.58043	0.5505	0.581976	NA
C1orf21	474.737	-0.0532332	0.187175	-0.284403	0.776101	0.8917
C1orf216	105.086	0.229687	0.274851	0.835676	0.403337	0.642734
C1orf220	26.3386	0.0610624	0.593073	0.102959	0.917995	NA
C1orf226	137.885	0.120785	0.27278	0.442793	0.657916	0.825283
C1orf228	3.17204	2.42759	2.17738	1.11492	0.264887	NA
C1orf229	3.75127	-2.64107	1.79262	-1.47329	0.140672	NA
C1orf233	155.266	-0.462248	0.330556	-1.39839	0.161995	0.387613
C1orf234	5.57965	0.43013	1.37586	0.312626	0.754565	NA
C1orf27	760.877	0.291249	0.141008	2.06549	0.0388769	0.171032
C1orf35	1487.22	-0.0948645	0.129073	-0.73497	0.462358	0.69116
C1orf43	7105.38	0.110734	0.0779424	1.42072	0.1554	0.379188
C1orf50	556.292	0.0606799	0.139927	0.433656	0.664539	0.827794
C1orf52	1976.78	-0.148169	0.0886951	-1.67055	0.0948112	0.284766
C1orf53	125.716	-0.453074	0.395346	-1.14602	0.251788	0.495078
C1orf54	17.1303	-1.09622	0.633101	-1.73151	0.0833616	NA
C1orf56	445.033	-0.35242	0.159766	-2.20585	0.0273948	0.140941
C1orf61	26.4374	-0.088431	0.573574	-0.154175	0.877471	NA
C1orf64	0.531844	0	6.66256	0	1	NA
C1orf74	214.006	0.241086	0.243834	0.988729	0.322796	0.57091
C1orf94	0.389415	0	6.66256	0	1	NA
C1QA	0.558312	0	6.66256	0	1	NA
C1QB	1.20277	0	6.66256	0	1	NA
C1QBP	22801.1	0.205219	0.0849087	2.41694	0.0156516	0.101982
C1QC	0.585641	0	6.66256	0	1	NA
C1QL1	123.464	-0.496561	0.302915	-1.63927	0.101156	0.29554
C1QL2	0.706577	-3.88586	5.72243	-0.679057	0.497102	NA
C1QL3	0.59194	1.11017	6.52675	0.170095	0.864935	NA
C1QL4	34.0889	-1.87886	0.495215	-3.79403	0.000148219	NA
C1QTNF1	77.9435	-0.869519	0.459928	-1.89056	0.0586837	NA
C1QTNF2	6.55886	1.09715	1.47116	0.745774	0.455804	NA
C1QTNF3	0.850698	2.80093	4.1935	0.667923	0.504183	NA
C1QTNF3-AMACR	431.82	-0.22482	0.162927	-1.37988	0.167623	0.395948
C1QTNF4	4.47367	0.806749	1.81759	0.443855	0.657147	NA
C1QTNF6	40.6539	-0.118803	0.627577	-0.189304	0.849854	NA
C1QTNF9	1.13668	0.554683	2.62267	0.211495	0.832501	NA
C1QTNF9B	82.1912	-0.0344541	0.405906	-0.0848819	0.932355	0.970106
C1QTNF9B-AS1	11.4229	0.0627763	0.755523	0.0830898	0.93378	NA
C1R	122.656	-0.0901798	0.290485	-0.310446	0.756222	0.880157
C1RL	9.62245	0.210005	1.10203	0.190562	0.848868	NA
C1RL-AS1	2.22854	-3.50072	2.42741	-1.44216	0.149258	NA
C1S	12.5323	-0.449318	1.15795	-0.388029	0.697994	NA
C2	29.665	-0.0912797	0.631652	-0.144509	0.885098	NA
C2-AS1	1.19783	-0.301045	2.80429	-0.107352	0.91451	NA
C20orf144	2.05423	0.320434	1.81783	0.176273	0.86008	NA
C20orf166-AS1	3.14997	-3.72133	2.20664	-1.68642	0.0917145	NA
C20orf194	294.755	-0.0448234	0.171419	-0.261484	0.793719	0.901592
C20orf196	67.6352	0.670669	0.356906	1.87912	0.0602279	NA
C20orf24	3675.07	-0.142475	0.0949467	-1.50058	0.133465	0.34853
C20orf27	6701.32	-0.0870849	0.103589	-0.840679	0.400528	0.640532
C20orf96	283.898	-0.223703	0.223627	-1.00034	0.317146	0.564914
C21orf140	3.37256	2.03779	1.71319	1.18948	0.234252	NA
C21orf2	520.374	-0.0497326	0.137272	-0.362293	0.717133	0.85591
C21orf33	1513.67	0.0706473	0.0898161	0.786577	0.431529	0.66679
C21orf58	377.583	-0.0667064	0.213098	-0.313031	0.754257	0.878381
C21orf59	3666.28	0.115482	0.110308	1.04691	0.295141	0.54153
C21orf62-AS1	12.6032	-0.141749	0.860276	-0.164771	0.869124	NA
C21orf91	407.095	0.232883	0.202498	1.15005	0.250122	0.493745
C21orf91-OT1	13.9575	-0.320286	0.905814	-0.35359	0.723646	NA
C22orf15	6.32543	1.20986	1.24457	0.972106	0.330998	NA
C22orf23	79.6435	-0.201804	0.381715	-0.528676	0.59703	NA
C22orf24	26.8892	-0.360003	0.626802	-0.574349	0.565732	NA
C22orf29	511.416	-0.105662	0.155064	-0.681404	0.495616	0.715359
C22orf34	0.520387	2.79977	6.5979	0.424342	0.671316	NA
C22orf39	578.878	-0.414392	0.195028	-2.12478	0.0336047	0.157545
C22orf46	355.605	-0.732542	0.174159	-4.20617	2.59736e-05	0.00132091
C2CD2L	1946.02	-0.06843	0.109573	-0.624512	0.532291	0.739502
C2CD3	2407.61	0.166555	0.0947547	1.75775	0.0787897	0.255506
C2CD4A	12.1822	0.697582	1.03709	0.672631	0.501182	NA
C2CD4C	25.257	-0.89994	0.541708	-1.6613	0.0966527	NA
C2CD5	1469.89	0.0444901	0.116705	0.38122	0.70304	0.847755
C2orf15	21.8837	1.10837	0.751637	1.47461	0.140317	NA
C2orf16	41.6193	0.133163	0.633296	0.210271	0.833457	NA
C2orf27A	10.9766	0.32397	0.868588	0.372984	0.70916	NA
C2orf27B	6.54294	0.880273	1.1672	0.754173	0.450745	NA
C2orf42	621.519	-0.0139968	0.198718	-0.0704355	0.943847	0.975622
C2orf47	931.087	-0.0843422	0.139854	-0.603073	0.54646	0.749673
C2orf48	25.0107	0.343075	0.602068	0.569828	0.568795	NA
C2orf49	454.85	0.257877	0.193647	1.33168	0.182964	0.417081
C2orf50	1.8781	0.841996	3.60111	0.233816	0.815128	NA
C2orf61	0.487449	-0.993718	6.66256	-0.14915	0.881436	NA
C2orf66	4.04503	-0.788848	1.51003	-0.522406	0.601388	NA
C2orf68	411.224	0.274478	0.157283	1.74512	0.0809637	0.259127
C2orf69	222.682	0.330943	0.27116	1.22047	0.222285	0.464786
C2orf72	16.7302	1.01937	0.645815	1.57842	0.114468	NA
C2orf73	0.800117	3.122	5.08613	0.613826	0.53933	NA
C2orf74	217.788	0.146832	0.298359	0.492133	0.622626	0.802486
C2orf76	394.205	-0.259102	0.184119	-1.40726	0.159351	0.383913
C2orf78	2.42892	3.36703	6.58483	0.511331	0.609119	NA
C2orf81	155.301	-0.360524	0.209733	-1.71897	0.0856203	0.267982
C2orf82	22.2264	0.178638	0.894727	0.199657	0.841749	NA
C2orf88	3.81829	-0.753864	1.83339	-0.411186	0.680936	NA
C3	28.4873	0.0226702	0.919582	0.0246527	0.980332	NA
C3AR1	1.43314	-0.0604035	3.60018	-0.0167779	0.986614	NA
C3orf14	738.08	-0.0442733	0.170191	-0.260139	0.794757	0.902087
C3orf18	34.5637	0.466955	0.507513	0.920085	0.357529	NA
C3orf20	4.77821	1.75266	1.76101	0.995259	0.319611	NA
C3orf22	0.676163	2.38526	5.78649	0.412212	0.680184	NA
C3orf33	103.269	0.0895825	0.33995	0.263517	0.792152	0.901262
C3orf35	2.73247	-3.50739	2.40825	-1.4564	0.145281	NA
C3orf38	704.745	0.14955	0.161544	0.925754	0.354574	0.599212
C3orf49	0.898159	-0.0876947	3.89592	-0.0225093	0.982042	NA
C3orf52	151.615	0.330593	0.263911	1.25267	0.210326	0.449969
C3orf58	267.286	0.0731894	0.220847	0.331403	0.74034	0.870244
C3orf62	66.7881	-0.873261	0.366548	-2.38239	0.0172005	NA
C3orf67	237.288	0.0530533	0.230725	0.229942	0.818137	0.914186
C3orf70	17.3743	0.508478	0.661777	0.768352	0.442278	NA
C3orf80	13.1298	0.360365	0.739737	0.487153	0.62615	NA
C4A	46.4763	0.298387	0.418313	0.71331	0.475654	NA
C4B	25.6301	0.769355	0.551867	1.3941	0.163288	NA
C4orf19	6.78678	2.04298	1.11403	1.83385	0.0666756	NA
C4orf22	2.8667	-3.26139	2.76109	-1.1812	0.237525	NA
C4orf26	0.858684	0.929682	4.95549	0.187606	0.851185	NA
C4orf3	391.501	-0.116482	0.172311	-0.676	0.49904	0.718336
C4orf32	187.285	-0.269124	0.304183	-0.884741	0.376296	0.61937
C4orf33	223.406	0.78083	0.268696	2.906	0.00366078	0.0411324
C4orf36	6.22413	1.20719	1.36525	0.884225	0.376575	NA
C4orf46	1172.1	0.188027	0.11298	1.66424	0.0960638	0.287431
C4orf47	9.66923	0.200776	1.13253	0.17728	0.859288	NA
C4orf48	1565.55	-0.316947	0.158138	-2.00425	0.0450433	0.186289
C4orf50	1.38197	0	4.25061	0	1	NA
C5	44.194	0.0125399	0.59388	0.0211152	0.983154	NA
C5AR1	10.8945	-0.0884416	1.03567	-0.0853957	0.931947	NA
C5orf15	4500.89	-0.26404	0.115652	-2.28305	0.0224275	0.1259
C5orf22	2186.73	0.135621	0.0893264	1.51826	0.128949	0.341312
C5orf24	602.944	0.140458	0.13219	1.06254	0.287991	0.534062
C5orf30	127.788	0.348986	0.267654	1.30387	0.192277	0.428942
C5orf34	638.478	0.447618	0.164424	2.72235	0.00648203	0.0584064
C5orf42	1569.13	0.11902	0.135414	0.878933	0.379438	0.621952
C5orf45	513.915	-0.00914678	0.166221	-0.0550277	0.956116	0.981161
C5orf49	2.60152	-1.93154	2.23105	-0.865753	0.386626	NA
C5orf51	1699.27	0.0822697	0.12292	0.669297	0.503306	0.721361
C5orf56	9.16255	-1.35142	1.06292	-1.27141	0.203582	NA
C5orf60	3.19248	-0.789879	1.73926	-0.454146	0.649724	NA
C5orf63	182.645	0.221974	0.239777	0.925752	0.354575	0.599212
C5orf64	0.353986	-0.993667	6.66256	-0.149142	0.881442	NA
C5orf66	841.803	0.273393	0.142044	1.92471	0.0542658	0.206846
C5orf66-AS1	0.58121	0	6.66256	0	1	NA
C6orf1	594.764	-0.366001	0.157837	-2.31885	0.0204032	0.119163
C6orf106	1175.13	0.132624	0.120893	1.09703	0.272627	0.516751
C6orf118	7.52763	1.24256	1.47211	0.844073	0.398629	NA
C6orf120	518.23	-0.0349344	0.135943	-0.256978	0.797195	0.903659
C6orf132	4.00292	-0.589376	1.8469	-0.319117	0.749638	NA
C6orf136	1422.52	-0.40654	0.157748	-2.57715	0.00996199	0.0773294
C6orf141	5.34813	0.141121	1.09417	0.128975	0.897377	NA
C6orf163	7.86995	-0.186278	1.31889	-0.141238	0.887682	NA
C6orf201	155.594	0.525028	0.264196	1.98727	0.0468929	0.189689
C6orf203	298.803	0.19764	0.210714	0.937951	0.34827	0.593888
C6orf222	0.30536	0	6.66256	0	1	NA
C6orf223	1.08651	-0.0319439	2.92212	-0.0109318	0.991278	NA
C6orf226	67.3161	-0.193621	0.43324	-0.446914	0.654937	NA
C6orf229	0.571584	-3.18314	5.55996	-0.572512	0.566975	NA
C6orf25	0.433718	-1.92593	6.63457	-0.290287	0.771597	NA
C6orf47	310.517	-0.194531	0.200888	-0.968359	0.332865	0.579748
C6orf48	207.009	0.381236	0.301597	1.26406	0.206209	0.445531
C6orf52	61.9887	-0.21374	0.517577	-0.412963	0.679634	NA
C6orf58	0.486197	2.38492	6.61127	0.360736	0.718297	NA
C6orf62	1307.55	0.207092	0.129475	1.59947	0.109716	0.310493
C6orf89	1659.75	0.218464	0.105397	2.07276	0.0381946	0.169531
C6orf99	8.66915	-1.57423	1.17073	-1.34465	0.178737	NA
C7orf13	57.4409	0.0707906	0.438972	0.161264	0.871885	NA
C7orf25	344.856	0.0775198	0.18071	0.428974	0.667942	0.830148
C7orf26	1546.34	-0.101515	0.105868	-0.958882	0.337618	0.584464
C7orf31	616.448	-0.090226	0.130792	-0.689843	0.490293	0.711892
C7orf43	806.884	-0.353319	0.213713	-1.65324	0.0982822	0.291328
C7orf49	665.415	0.276464	0.144198	1.91725	0.0552068	0.208756
C7orf50	4526.01	-0.095089	0.0829463	-1.14639	0.251633	0.495078
C7orf55	788.307	-0.314669	0.164116	-1.91736	0.0551926	0.208756
C7orf55-LUC7L2	385.184	-0.108329	0.225024	-0.481412	0.630224	0.807941
C7orf57	22.6959	0.110494	0.909867	0.12144	0.903343	NA
C7orf61	5.07312	-1.26041	1.44196	-0.874096	0.382066	NA
C7orf73	1127.73	-0.353939	0.153327	-2.30839	0.0209776	0.121317
C8G	9.30403	-0.844779	1.01431	-0.832857	0.404926	NA
C8orf31	67.3923	-0.198371	0.340522	-0.582548	0.560198	NA
C8orf33	6835.93	-0.0282771	0.116337	-0.243062	0.807957	0.91027
C8orf34	61.9259	0.193127	0.650325	0.29697	0.766489	NA
C8orf34-AS1	16.9974	0.582683	0.908211	0.641572	0.521151	NA
C8orf37	30.9278	0.0713835	0.753499	0.094736	0.924525	NA
C8orf37-AS1	2.56496	-1.7424	2.07858	-0.838264	0.401882	NA
C8orf4	0.998857	0	4.8443	0	1	NA
C8orf44	30.3537	-0.710692	0.534489	-1.32967	0.183629	NA
[truncated: 21,293 more rows]

## Sheet: AA263-5 DESEQ
	baseMean	log2FoldChange	lfcSE	stat	pvalue	padj
44623	216.705	0.0193142	0.243814	0.0792169	0.93686	0.968928
44625	860.854	0.22003	0.146987	1.49693	0.134411	0.312122
44626	3705.79	0.130904	0.119411	1.09624	0.272974	0.488646
44627	2921.05	0.28956	0.0796318	3.63623	0.000276653	0.0036842
44628	1760.55	0.0265023	0.112472	0.235635	0.813716	0.906656
44629	602.08	-0.0508175	0.121366	-0.418713	0.675426	0.82205
44630	1.46882	0	6.66256	0	1	NA
44631	0.711392	0.799433	6.28437	0.12721	0.898774	NA
44805	153.747	-0.950176	0.234923	-4.04464	5.24043e-05	0.00100555
44806	6610.27	0.336678	0.0807066	4.17163	3.02433e-05	0.000675417
44807	518.602	-0.0529205	0.142486	-0.371407	0.710334	0.843115
44808	74.7131	0.164275	0.369804	0.444222	0.656882	0.811463
44809	177.005	0.221766	0.558266	0.397241	0.69119	0.830859
44810	4049.93	-0.241114	0.0862589	-2.79523	0.00518622	0.032426
44811	2670.02	0.245731	0.128575	1.91119	0.0559796	0.173539
44812	4593.93	0.105347	0.0689932	1.52691	0.126783	0.30112
44813	3935.42	-0.386827	0.0922759	-4.19207	2.7642e-05	0.000639789
44814	1735.17	-0.0155594	0.0836944	-0.185907	0.852518	0.927148
44815	2600.46	0.351271	0.126453	2.77787	0.0054717	0.0335358
44816	0.689219	-3.8259	4.35253	-0.879006	0.379398	NA
44819	2593.1	0.117051	0.0874053	1.33918	0.180512	0.37615
2024-03-01	2892.14	-0.00288381	0.097164	-0.0296798	0.976322	0.987562
2024-03-02	553.106	-0.240766	0.143759	-1.67479	0.0939747	0.247583
A1BG	127.5	-0.290387	0.279312	-1.03965	0.298502	0.515717
A1BG-AS1	406.196	0.0196348	0.185146	0.10605	0.915542	0.958987
A1CF	0.81528	-0.629795	3.86893	-0.162783	0.87069	NA
A2M	1.25754	3.8848	3.18327	1.22038	0.222321	NA
A2M-AS1	6.57286	0.17276	1.20697	0.143135	0.886184	NA
A2ML1	2.9918	2.0016	2.58287	0.774951	0.438369	NA
A3GALT2	0.743035	-0.143962	5.18587	-0.0277605	0.977853	NA
A4GALT	106.179	-0.970445	0.340759	-2.84789	0.00440096	0.0288378
AAAS	7812	-0.55595	0.132946	-4.18178	2.89237e-05	0.000655897
AACS	910.536	0.104735	0.129992	0.805706	0.420412	0.634567
AADAT	832.51	-0.179131	0.169127	-1.05915	0.289532	0.506377
AAED1	427.266	-0.0900154	0.243894	-0.369077	0.712071	0.844032
AAGAB	2767.85	0.279829	0.117357	2.38442	0.0171061	0.0764309
AAK1	970.758	-0.454726	0.166324	-2.73397	0.0062575	0.0368632
AAMDC	359.153	0.34473	0.251985	1.36806	0.171295	0.363718
AAMP	6160.86	0.154494	0.0753444	2.05051	0.0403149	0.138586
AANAT	20.9592	-0.897298	0.64875	-1.38312	0.166629	NA
AAR2	2087.23	-0.195276	0.118136	-1.65298	0.0983356	0.254856
AARD	27.8188	-0.066758	0.589667	-0.113213	0.909862	NA
AARS	11915.5	0.38517	0.0628896	6.12454	9.09431e-10	1.21455e-07
AARS2	2541.73	0.319844	0.0902433	3.54424	0.000393743	0.00474589
AARSD1	730.605	0.297428	0.242538	1.22632	0.22008	0.427391
AASDH	733.106	0.323428	0.122227	2.64613	0.0081418	0.0448387
AASDHPPT	1600.48	0.184823	0.124263	1.48735	0.136923	0.315766
AASS	1704.52	0.395886	0.090048	4.39639	1.10066e-05	0.000306236
AATBC	11.109	-0.765055	1.07404	-0.712312	0.476271	NA
AATF	6218.88	0.0592517	0.0860099	0.688893	0.49089	0.692452
AATK	108.628	-0.934376	0.381907	-2.4466	0.0144209	0.0674339
AATK-AS1	1.52106	-1.03369	3.73316	-0.276894	0.781861	NA
ABALON	269.203	-0.0985963	0.196866	-0.500829	0.616492	0.783895
ABAT	127.204	0.303302	0.347987	0.871591	0.383431	0.599968
ABCA1	31.1131	-0.207099	0.720169	-0.28757	0.773676	NA
ABCA10	2.74106	-0.149965	2.59646	-0.0577573	0.953942	NA
ABCA12	2.37843	1.04803	2.48129	0.422374	0.672752	NA
ABCA13	0.782513	-5.17943	6.56657	-0.788757	0.430254	NA
ABCA2	1954.14	-0.100466	0.12152	-0.826746	0.408381	0.623449
ABCA3	1474.02	-0.000594159	0.131446	-0.00452019	0.996393	0.997663
ABCA4	1.33244	1.15929	4.2091	0.275425	0.78299	NA
ABCA5	277.55	0.107035	0.293217	0.365038	0.715083	0.8461
ABCA7	549.239	-0.20694	0.176957	-1.16944	0.242228	0.454341
ABCA8	1.5363	1.40853	3.52132	0.400002	0.689155	NA
ABCA9	0.442613	0	6.66256	0	1	NA
ABCB1	408.392	0.550496	0.14952	3.68176	0.000231628	0.00321224
ABCB10	2294.9	0.106024	0.0984235	1.07723	0.281379	0.498159
ABCB4	15.1103	-0.41727	0.892306	-0.46763	0.640049	NA
ABCB5	0.331853	-2.01066	6.63702	-0.302946	0.761931	NA
ABCB6	539.592	0.411869	0.152981	2.69228	0.00709646	0.0406403
ABCB7	1465.92	0.298944	0.109111	2.73982	0.00614728	0.036439
ABCB8	1875.68	-0.190142	0.1333	-1.42642	0.153747	0.338596
ABCB9	463.712	0.0985983	0.180762	0.54546	0.585437	0.761494
ABCC1	2602.25	0.105084	0.12466	0.842964	0.399248	0.61499
ABCC10	1329.22	0.0802092	0.119997	0.668425	0.503863	0.703438
ABCC11	21.161	0.616186	0.752922	0.818393	0.413133	NA
ABCC2	25.5475	0.918756	0.643556	1.42763	0.1534	NA
ABCC3	1.55478	2.68697	3.62403	0.741432	0.458431	NA
ABCC4	974.346	0.390256	0.16149	2.4166	0.0156661	0.0716266
ABCC5	1882.78	0.213253	0.138417	1.54066	0.1234	0.29566
ABCC6	56.6895	-0.533992	0.444536	-1.20124	0.22966	0.43954
ABCC8	77.1685	0.747162	0.364476	2.04996	0.0403683	0.138662
ABCC9	3.74861	-0.215316	2.27414	-0.0946802	0.924569	NA
ABCD1	1675.27	-0.473604	0.11746	-4.03203	5.52967e-05	0.00104899
ABCD2	18.597	-0.0407245	0.808134	-0.0503933	0.959809	NA
ABCD3	2294.14	0.275108	0.0950819	2.89338	0.0038112	0.0258631
ABCD4	1502.89	0.343685	0.117542	2.92392	0.0034565	0.0241178
ABCE1	2908.78	0.359042	0.084563	4.24586	2.17761e-05	0.000530692
ABCF1	9721.71	0.163955	0.0758647	2.16114	0.0306843	0.114562
ABCF2	7394.31	0.252603	0.0776606	3.25266	0.00114331	0.0105086
ABCF3	1417.1	0.340014	0.100235	3.39218	0.000693383	0.00726854
ABCG1	100.737	-0.612862	0.30487	-2.01024	0.0444059	0.147853
ABCG2	93.832	-0.154077	0.372141	-0.414028	0.678853	0.823933
ABCG4	37.5396	0.189415	0.649742	0.291524	0.770651	0.881168
ABCG5	4.83082	0.743798	1.48765	0.49998	0.617089	NA
ABCG8	1.53085	2.7217	3.05818	0.889976	0.373479	NA
ABHD1	27.9783	-1.71693	0.684178	-2.50948	0.0120909	NA
ABHD10	2415.35	0.0605243	0.0894881	0.676339	0.498825	0.699183
ABHD11	1158.52	-0.160714	0.148103	-1.08515	0.277855	0.493976
ABHD11-AS1	1.25562	-4.03248	3.31477	-1.21652	0.223788	NA
ABHD12	1048.26	0.255669	0.0971413	2.63193	0.0084901	0.0462986
ABHD12B	9.81121	0.950453	0.955832	0.994372	0.320042	NA
ABHD13	169.779	0.0288331	0.230078	0.125319	0.900271	0.952712
ABHD14A	915.214	-0.387876	0.163329	-2.37481	0.017558	0.0775614
ABHD14A-ACY1	787.191	-0.226132	0.130581	-1.73174	0.0833194	0.228346
ABHD14B	508.873	-0.357625	0.136248	-2.62481	0.00866974	0.0470286
ABHD15	335.753	-0.219891	0.182945	-1.20195	0.229382	0.439071
ABHD16A	668.306	0.0501717	0.151521	0.331119	0.740554	0.862333
ABHD16B	79.7218	-0.292033	0.32283	-0.904605	0.365675	0.583444
ABHD17A	3064.48	-0.333461	0.085849	-3.88428	0.000102634	0.00168313
ABHD17B	330.642	0.290546	0.211826	1.37163	0.17018	0.362538
ABHD17C	182.549	-0.383787	0.255664	-1.50114	0.13332	0.310568
ABHD18	261.278	0.209399	0.22495	0.930866	0.351923	0.569412
ABHD2	934.112	0.386925	0.116893	3.31008	0.000932699	0.00896774
ABHD3	935.672	0.413235	0.128159	3.22439	0.0012624	0.0113226
ABHD4	935.197	-0.429367	0.161079	-2.66557	0.00768581	0.0430209
ABHD5	795.069	0.0360023	0.118751	0.303175	0.761757	0.875472
ABHD6	400.765	0.1911	0.187062	1.02158	0.306978	0.523455
ABHD8	182.719	-0.330206	0.248173	-1.33055	0.183338	0.379256
ABI1	3058.7	-0.16038	0.127076	-1.26207	0.206923	0.409664
ABI2	3873.52	-0.0705314	0.082275	-0.857263	0.391299	0.607171
ABI3	3.26944	0.716988	2.74055	0.261622	0.793613	NA
ABI3BP	20.5232	-0.540928	0.692198	-0.781465	0.434529	NA
ABL1	2730.17	-0.082871	0.0913966	-0.906718	0.364556	0.582443
ABL2	925.402	0.29427	0.185075	1.59	0.111835	0.277973
ABLIM1	1192.19	-0.0848428	0.163194	-0.519888	0.603142	0.774335
ABLIM2	31.5554	0.138961	0.518746	0.267878	0.788793	NA
ABLIM3	29.3737	-0.544084	0.558906	-0.973481	0.330314	NA
ABR	2527.87	-0.169022	0.091905	-1.8391	0.0659004	0.193897
ABRACL	380.837	-0.127485	0.165669	-0.769515	0.441588	0.652295
ABT1	2424.52	0.0408266	0.0925728	0.441022	0.659197	0.812669
ABTB1	154.033	-0.30305	0.38628	-0.784534	0.432727	0.645158
ABTB2	732.619	-0.257136	0.138874	-1.85158	0.0640868	0.190449
ACAA1	1424.6	0.135844	0.104424	1.30089	0.193296	0.393217
ACAA2	941.51	0.167461	0.103798	1.61334	0.106671	0.268891
ACACA	5020	0.341093	0.103401	3.29873	0.000971238	0.0092583
ACACB	781.072	0.0905887	0.191607	0.472783	0.636368	0.797251
ACAD10	452.74	-0.00762716	0.160845	-0.0474194	0.962179	0.980687
ACAD11	171.242	-0.240323	0.715196	-0.336025	0.736852	0.859632
ACAD8	475.488	0.290802	0.194965	1.49156	0.135814	0.313792
ACAD9	2252.6	0.215949	0.0828497	2.60652	0.00914674	0.049008
ACADL	68.4909	0.95812	0.58403	1.64053	0.100895	0.258613
ACADM	2123.17	0.261884	0.12708	2.06078	0.0393242	0.136409
ACADS	255.32	-0.128867	0.2082	-0.618957	0.535945	0.726801
ACADSB	491.476	0.600641	0.141673	4.23962	2.23895e-05	0.000541689
ACADVL	1886.12	0.0558541	0.13431	0.415859	0.677513	0.823252
ACAN	27.5867	-0.109661	0.700134	-0.156628	0.875538	NA
ACAP1	350.735	-0.350456	0.20402	-1.71776	0.085841	0.233249
ACAP2	504.961	0.354564	0.203961	1.73839	0.0821413	0.226045
ACAP3	580.174	0.0126357	0.188601	0.066997	0.946584	0.973412
ACAT1	5021.71	0.281494	0.12757	2.20658	0.0273437	0.105909
ACAT2	4028.27	0.325389	0.105024	3.09823	0.0019468	0.0154483
ACBD3	2084.18	0.462623	0.12703	3.64183	0.000270702	0.00361523
ACBD4	87.1747	-0.144314	0.34613	-0.416936	0.676725	0.822802
ACBD5	372.106	0.185419	0.132972	1.39442	0.163191	0.3522
ACBD6	2568.97	-0.108478	0.0920708	-1.1782	0.238718	0.450611
ACBD7	27.7233	0.418779	0.607432	0.689426	0.490555	NA
ACCS	69.3079	-0.246414	0.423987	-0.581182	0.561118	0.744016
ACCSL	0.589036	-3.5758	6.58461	-0.543055	0.587092	NA
ACD	2388.75	-0.661633	0.161888	-4.08697	4.37034e-05	0.000873778
ACE	73.9251	-0.247559	0.378264	-0.654461	0.512815	0.710205
ACE2	21.8967	1.05342	0.861848	1.22227	0.221604	NA
ACER2	173.538	-0.483528	0.293668	-1.64651	0.0996581	0.256887
ACER3	1121.62	-0.00128135	0.104579	-0.0122525	0.990224	0.994319
ACHE	98.748	-0.0732332	0.395089	-0.185359	0.852948	0.927223
ACIN1	17704.8	-0.0391596	0.0738819	-0.530029	0.596092	0.769274
ACKR2	1.58321	0.852839	3.1987	0.26662	0.789761	NA
ACKR3	1.84463	-4.58945	3.21792	-1.42621	0.153806	NA
ACKR4	5.77473	1.53423	1.489	1.03038	0.302832	NA
ACLY	25612.2	0.164733	0.0663289	2.48358	0.0130068	0.0627756
ACMSD	1.20573	-4.02796	3.34355	-1.2047	0.22832	NA
ACO1	3008.95	0.170292	0.104179	1.63461	0.102132	0.260903
ACO2	10191.2	0.0582741	0.0744049	0.783202	0.433508	0.645657
ACOT1	267.979	-0.182885	0.178364	-1.02535	0.305198	0.522019
ACOT11	44.7985	-0.365751	0.544896	-0.671231	0.502073	0.702114
ACOT13	681.296	-0.127814	0.221755	-0.576373	0.564363	0.746245
ACOT2	961.943	-0.147495	0.108954	-1.35374	0.175819	0.369774
ACOT4	1.37319	-0.336273	2.36424	-0.142233	0.886896	NA
ACOT6	1.41163	-0.151552	2.67478	-0.0566596	0.954816	NA
ACOT7	4506.64	-0.198072	0.0943998	-2.09823	0.035885	0.128445
ACOT8	1321.93	-0.132198	0.130755	-1.01104	0.311998	0.528372
ACOT9	756.543	0.0582046	0.158513	0.367191	0.713476	0.845023
ACOX1	785.432	0.153076	0.114658	1.33506	0.181857	0.377361
ACOX2	2.92913	-2.04323	2.50274	-0.816399	0.414272	NA
ACOX3	499.734	0.209845	0.180879	1.16014	0.245992	0.45883
ACOXL	11.0723	0.753629	1.00088	0.752964	0.451472	NA
ACP1	4471.32	0.0919926	0.0628756	1.46309	0.143443	0.324803
ACP2	2733.64	0.022671	0.085232	0.265992	0.790245	0.894069
ACP5	1.19277	1.79613	3.69673	0.48587	0.627059	NA
ACP6	1239.9	0.216972	0.095394	2.27449	0.0229367	0.0929931
ACPP	3.24768	-1.25165	1.96977	-0.63543	0.525148	NA
ACPT	2.98381	-0.0607857	1.74671	-0.0348001	0.972239	NA
ACR	7.58673	-0.258559	0.88382	-0.292547	0.769869	NA
ACRBP	5.11996	-1.48204	1.36467	-1.086	0.277479	NA
ACRC	35.5915	-0.0103921	0.666881	-0.0155831	0.987567	NA
ACRV1	3.92639	0.674225	1.48706	0.453394	0.650265	NA
ACSBG1	6.28769	0.722323	1.57019	0.460022	0.645501	NA
ACSBG2	2.92482	4.02415	2.13536	1.88453	0.0594933	NA
ACSF2	399.991	-0.126608	0.166559	-0.760138	0.447172	0.657056
ACSF3	1355.18	-0.158749	0.139123	-1.14107	0.253839	0.467336
ACSL1	624.605	0.324927	0.171771	1.89163	0.0585407	0.178822
ACSL3	6695.34	0.2638	0.0718616	3.67095	0.000241654	0.00332026
ACSL4	1318.14	0.34504	0.145055	2.37869	0.0173742	0.0772249
ACSL5	1.8167	3.71622	2.82153	1.31709	0.187808	NA
ACSL6	82.2368	0.231127	0.469675	0.4921	0.622649	0.788182
ACSM2A	0.373194	0	6.66256	0	1	NA
ACSM3	137.826	-0.364659	0.335486	-1.08696	0.277055	0.493264
ACSM6	0.555643	0	6.66256	0	1	NA
ACSS1	673.761	0.0141129	0.119519	0.118081	0.906003	0.954308
ACSS2	664.065	0.058451	0.135444	0.43155	0.666068	0.816836
ACSS3	219.894	0.321009	0.307107	1.04527	0.295899	0.513253
ACTA1	24.41	-0.298248	0.805511	-0.370259	0.71119	NA
ACTA2	75.4087	-0.539264	0.348149	-1.54895	0.121394	0.292692
ACTA2-AS1	42.8778	-0.65466	0.442631	-1.47902	0.139135	0.31894
ACTB	65714.1	-0.331784	0.105069	-3.15776	0.00158985	0.0133202
ACTBL2	0.518054	-3.57579	6.58461	-0.543053	0.587094	NA
ACTC1	1.28822	-3.64039	3.30474	-1.10157	0.270651	NA
ACTG1	158868	-0.298297	0.110319	-2.70396	0.0068518	0.0395444
ACTG2	75.949	0.176983	0.344672	0.513482	0.607614	0.776998
ACTL10	0.483867	1.71064	6.59781	0.259274	0.795424	NA
ACTL6A	2201.1	0.2268	0.103368	2.19411	0.0282274	0.108299
ACTL6B	10.142	-1.12791	1.06562	-1.05845	0.289849	NA
ACTL7A	0.574088	-1.99213	6.63803	-0.300109	0.764094	NA
ACTL7B	0.351295	-2.05612	6.63457	-0.30991	0.75663	NA
ACTL8	45.8292	0.461578	0.377726	1.22199	0.221711	0.429061
ACTN1	7398.76	-0.260776	0.0842175	-3.09646	0.00195844	0.015513
ACTN2	167.734	0.178739	0.249417	0.716627	0.473604	0.678137
ACTN3	2.256	2.746	2.12637	1.2914	0.196564	NA
ACTN4	18743.7	-0.130927	0.0863392	-1.51643	0.129412	0.304868
ACTR10	1462.96	-0.1533	0.10311	-1.48676	0.137078	0.315931
ACTR1A	3273.89	0.0760623	0.118017	0.644503	0.51925	0.714257
ACTR1B	567.672	-0.0856306	0.1816	-0.471533	0.63726	0.79753
ACTR2	3898.13	0.19716	0.106631	1.84899	0.0644589	0.191257
ACTR3	7122.64	-0.0469432	0.0853287	-0.550145	0.58222	0.758565
ACTR3B	1317.93	-0.333763	0.0907896	-3.67623	0.000236707	0.0032691
ACTR3C	137.822	-0.0609893	0.250584	-0.243389	0.807704	0.903504
ACTR5	703.75	0.130667	0.144213	0.90607	0.364899	0.582782
ACTR6	951.097	-0.0735083	0.140728	-0.522343	0.601431	0.773119
ACTR8	1674.36	0.173412	0.105477	1.64408	0.100161	0.257437
ACTRT3	97.0939	0.140592	0.361056	0.389391	0.696987	0.834747
ACVR1	210.2	0.158054	0.214124	0.738139	0.46043	0.666149
ACVR1B	555.312	0.270025	0.158789	1.70053	0.0890307	0.238948
ACVR1C	25.1234	0.516447	0.685643	0.753229	0.451312	NA
ACVR2A	287.486	0.3618	0.215513	1.67878	0.0931947	0.2466
ACVR2B	396.36	0.134171	0.238094	0.563521	0.57308	0.752512
ACVR2B-AS1	70.3332	0.163051	0.348305	0.468126	0.639694	0.799394
ACVRL1	4.98809	-0.420721	1.72613	-0.243736	0.807435	NA
ACY1	1.21839	0.764944	6.63481	0.115293	0.908213	NA
ACYP1	180.576	-0.181984	0.239744	-0.759078	0.447806	0.657626
ACYP2	133.842	0.111561	0.298749	0.373427	0.708831	0.84236
ADA	762.87	-0.0963353	0.162516	-0.592775	0.553332	0.738384
ADAL	305.443	0.137478	0.194627	0.706368	0.479959	0.683208
ADAM10	1184.96	0.570685	0.143494	3.97708	6.97673e-05	0.0012553
ADAM11	511.528	-0.259227	0.154202	-1.68109	0.0927453	0.245757
ADAM12	6.46691	-1.01993	1.63769	-0.622784	0.533426	NA
ADAM15	3677.45	-0.204668	0.0966591	-2.11742	0.0342243	0.124135
ADAM17	950.396	0.543602	0.116477	4.66704	3.05569e-06	0.000112112
ADAM19	206.429	-0.011529	0.241597	-0.0477199	0.961939	0.980664
ADAM20	0.403167	0	6.66256	0	1	NA
ADAM21	6.50821	-0.169751	1.36721	-0.124158	0.90119	NA
ADAM22	226.938	0.547959	0.223187	2.45516	0.0140822	0.0662678
ADAM23	459.036	0.340756	0.189957	1.79386	0.0728355	0.208291
ADAM28	0.467819	0	6.66256	0	1	NA
ADAM29	0.298558	0	6.66256	0	1	NA
ADAM32	2.6858	-0.508491	2.21782	-0.229275	0.818655	NA
ADAM8	67.5968	0.0751239	0.424608	0.176925	0.859567	0.931419
ADAM9	3463.41	0.167231	0.0890141	1.8787	0.0602848	0.18277
ADAMTS1	2578.89	0.317058	0.125135	2.53373	0.0112855	0.0571984
ADAMTS10	57.74	-0.448692	0.599215	-0.748801	0.453977	0.662102
ADAMTS12	3.55123	-2.2031	2.25729	-0.975994	0.329068	NA
ADAMTS13	181.635	-0.0209993	0.376469	-0.0557796	0.955517	0.978074
ADAMTS14	1.56684	0.653192	2.87279	0.227372	0.820135	NA
ADAMTS15	292.053	-0.10813	0.205898	-0.525163	0.59947	0.772027
ADAMTS16	0.388376	3.84185	6.57552	0.584265	0.559042	NA
ADAMTS17	269.688	0.180352	0.208352	0.865613	0.386702	0.602756
ADAMTS18	3.99059	2.06964	2.10395	0.983693	0.325267	NA
ADAMTS19	125.215	-0.285401	0.30458	-0.937033	0.348741	0.567093
ADAMTS19-AS1	23.9237	-0.292543	0.701804	-0.416844	0.676792	NA
ADAMTS2	258.762	-0.249443	0.28908	-0.862887	0.3882	0.604384
ADAMTS20	69.7042	0.946059	0.481017	1.96679	0.0492076	0.158851
ADAMTS3	224.801	-0.278591	0.298568	-0.93309	0.350773	0.568517
ADAMTS4	4.69868	-1.43564	2.09398	-0.685602	0.492964	NA
ADAMTS5	10.4883	0.71011	1.18046	0.601555	0.547471	NA
ADAMTS6	35.2926	0.946412	0.510664	1.8533	0.0638396	NA
ADAMTS7	98.1792	-0.364602	0.31167	-1.16984	0.242067	0.454341
ADAMTS8	31.7325	-0.350475	0.900395	-0.389245	0.697095	NA
ADAMTS9	342.244	0.000160312	0.187616	0.000854466	0.999318	0.999543
ADAMTS9-AS1	3.5684	-0.287981	1.45972	-0.197286	0.843604	NA
ADAMTS9-AS2	1.173	3.17997	6.57216	0.483854	0.62849	NA
ADAMTSL1	1.50429	-2.99354	3.53187	-0.847579	0.396673	NA
ADAMTSL3	26.838	0.585922	0.693042	0.845434	0.397869	NA
ADAMTSL4	58.8498	0.00326862	0.456409	0.00716159	0.994286	0.99645
ADAMTSL4-AS1	0.685272	0	4.89342	0	1	NA
ADAMTSL5	63.8254	-0.116704	0.396054	-0.294666	0.768249	0.879476
ADAP1	258.795	-0.613588	0.241881	-2.53673	0.0111892	0.0567967
ADAP2	145.112	-0.235921	0.260627	-0.905206	0.365356	0.583109
ADAR	8483.42	0.0786807	0.116091	0.677751	0.49793	0.698571
ADARB1	1178.04	0.055638	0.110711	0.50255	0.615281	0.782653
ADAT1	478.258	0.638723	0.188308	3.3919	0.000694095	0.00727031
ADAT2	204.978	0.48752	0.245596	1.98505	0.047139	0.154413
ADAT3	671.186	-0.606171	0.206609	-2.93391	0.00334723	0.0235772
ADCK1	992.283	-0.247589	0.150129	-1.64918	0.0991111	0.256071
ADCK2	1349.9	0.0167526	0.118635	0.141211	0.887703	0.945472
ADCK3	3440.61	0.0913576	0.0639085	1.42951	0.152859	0.337539
ADCK4	819.328	-0.265059	0.11064	-2.3957	0.0165885	0.0747436
ADCK5	153.916	-0.515466	0.389886	-1.3221	0.186136	0.3835
ADCY1	756.507	-0.0281078	0.170091	-0.165251	0.868746	0.935651
ADCY10	4.52732	-1.1693	1.67262	-0.699083	0.4845	NA
ADCY2	0.68818	0	6.66256	0	1	NA
ADCY3	1908.36	0.0484528	0.114931	0.421583	0.673329	0.821216
ADCY5	54.53	-0.0424019	0.466731	-0.0908487	0.927613	0.96456
ADCY6	1571.96	0.184974	0.155591	1.18885	0.234498	0.444784
ADCY7	106.455	0.247303	0.360611	0.685788	0.492847	0.694342
ADCY8	0.285061	-2.01065	6.63702	-0.302944	0.761932	NA
ADCY9	1546.79	0.0758993	0.107127	0.708499	0.478635	0.682123
ADCYAP1R1	85.8649	-0.263859	0.41785	-0.631468	0.527734	0.720209
ADD1	4429.46	0.0512013	0.0848528	0.603413	0.546234	0.73282
ADD2	1484.45	-0.206302	0.104686	-1.97068	0.0487604	0.157674
ADD3	1408.04	0.335282	0.184247	1.81974	0.0687984	0.200054
ADD3-AS1	131.536	-0.107077	0.315712	-0.339161	0.734489	0.858038
ADGRA1	1.11437	2.87414	3.64067	0.789453	0.429848	NA
ADGRA2	619.992	-0.292794	0.13051	-2.24346	0.0248669	0.098927
ADGRA3	1859.29	0.00838509	0.0901786	0.0929832	0.925917	0.96365
ADGRB1	169.015	-0.778126	0.278868	-2.7903	0.0052659	0.0327382
ADGRB2	689.98	-0.368498	0.161834	-2.27702	0.0227852	0.0925193
ADGRB3	145.765	-0.0969266	0.280769	-0.345218	0.72993	0.855632
ADGRD1	2.27835	-2.02406	3.56368	-0.56797	0.570055	NA
ADGRD2	1.19456	-4.61885	3.58492	-1.28841	0.197603	NA
ADGRE1	3.45172	-1.84218	2.62436	-0.701951	0.482709	NA
ADGRE2	21.7814	-0.795703	0.743499	-1.07021	0.284524	NA
ADGRE5	514.45	-0.11954	0.19464	-0.614161	0.539109	0.728283
ADGRF3	61.6578	0.489557	0.409402	1.19579	0.23178	0.441851
ADGRF4	0.773508	0	5.66109	0	1	NA
ADGRG1	1.93906	-1.45944	2.48166	-0.588093	0.55647	NA
ADGRG2	44.1668	-0.807018	0.572294	-1.41014	0.158497	0.345137
ADGRG3	1.62428	-1.46852	3.67933	-0.399126	0.6898	NA
ADGRG6	89.0848	-0.953585	0.497735	-1.91585	0.0553841	0.172293
ADGRL1	3121.58	-0.378121	0.129173	-2.92724	0.00341983	0.023937
ADGRL2	5581.87	0.274696	0.0714885	3.84251	0.00012178	0.00190442
ADGRL3	462.117	0.312407	0.199374	1.56694	0.117128	0.286074
ADGRL3-AS1	14.8336	-0.148779	0.913638	-0.162842	0.870643	NA
ADGRV1	463.703	0.581026	0.196098	2.96294	0.00304711	0.0219139
ADH5	2698.08	0.148047	0.126996	1.16576	0.243713	0.456235
ADH6	3.35748	-1.35697	1.89578	-0.715786	0.474124	NA
ADHFE1	8.12552	-1.20774	0.944715	-1.27842	0.201102	NA
ADI1	4849.79	0.204573	0.139535	1.46611	0.142618	0.323758
ADIPOR1	5541.81	-0.0427384	0.0822352	-0.51971	0.603266	0.774377
ADIPOR2	1279.52	0.263393	0.155716	1.6915	0.0907419	0.242178
ADK	1362.98	0.202886	0.105837	1.91697	0.0552418	0.172091
ADM	58.8812	-0.367435	0.428848	-0.856795	0.391558	0.607417
ADM2	36.0687	0.241098	0.636985	0.378499	0.70506	NA
ADM5	106.565	-0.289495	0.288682	-1.00282	0.31595	0.532251
ADNP	3875.4	0.104516	0.0816705	1.27973	0.200641	0.402518
ADNP-AS1	34.3196	-0.885423	0.560629	-1.57934	0.114258	NA
ADNP2	2142.06	0.0669055	0.117187	0.57093	0.568047	0.74872
ADO	652.025	-0.196854	0.155384	-1.26689	0.205195	0.407671
ADORA1	66.9747	-0.781897	0.495277	-1.57871	0.114403	0.282169
ADORA2A-AS1	6.70258	0.336724	1.16164	0.28987	0.771916	NA
ADORA2B	603.669	-0.00761433	0.150815	-0.0504877	0.959734	0.97975
ADPGK	2555.09	0.276087	0.0774618	3.56416	0.000365019	0.00449708
ADPGK-AS1	74.2467	0.511138	0.53492	0.955541	0.339304	0.557227
ADPRH	6.13769	0.549411	1.54775	0.354974	0.722609	NA
ADPRHL1	79.2421	0.0801804	0.319058	0.251304	0.801579	0.90064
ADPRHL2	854.936	-0.204329	0.126285	-1.618	0.105662	0.267206
ADPRM	133.225	-0.213297	0.269319	-0.791987	0.428368	0.640921
ADRA1A	2.72906	-0.849508	2.65266	-0.320248	0.74878	NA
ADRA1B	10.3114	1.23458	1.04066	1.18635	0.235484	NA
ADRA1D	0.496788	-2.01079	6.44819	-0.311839	0.755163	NA
ADRA2A	2.87177	0.408266	1.96004	0.208294	0.834999	NA
ADRA2B	0.953448	-0.252418	5.13163	-0.0491887	0.960769	NA
ADRA2C	495.218	-0.416404	0.213622	-1.94926	0.0512643	0.163358
ADRB1	12.6647	0.37282	0.855503	0.435791	0.662989	NA
ADRB2	50.3741	0.367902	0.451968	0.814001	0.415644	0.630215
ADRM1	13675.2	-0.294354	0.0948143	-3.10453	0.00190581	0.0152225
ADSL	7822.46	0.0175832	0.0670794	0.262125	0.793225	0.895782
ADSS	1925.58	0.298716	0.104201	2.86672	0.00414744	0.0275034
ADSSL1	51.0037	0.200439	0.401447	0.499291	0.617574	0.784478
AEBP1	3.25441	1.58276	1.43443	1.10341	0.269849	NA
AEBP2	749.29	0.293431	0.132406	2.21616	0.0266808	0.104036
AEN	941.845	0.16019	0.115202	1.39051	0.164374	0.353871
AES	1359.56	-0.830572	0.168737	-4.9223	8.55342e-07	3.91202e-05
AFAP1	355.364	0.207467	0.205174	1.01117	0.311934	0.528351
AFAP1-AS1	57.4297	0.516042	0.583182	0.884872	0.376226	0.593281
AFAP1L1	327.192	-0.0791953	0.205074	-0.386179	0.699364	0.836169
AFAP1L2	33.1906	0.490379	0.617214	0.794504	0.426902	NA
AFF1	965.038	-0.196373	0.202887	-0.967897	0.333096	0.551062
AFF2	689.203	-0.361143	0.151804	-2.379	0.0173597	0.0772068
AFF3	275.554	0.0212847	0.212871	0.0999888	0.920353	0.961461
AFF4	1911.96	0.200769	0.240912	0.833372	0.404635	0.619531
AFG3L2	2919.38	0.432239	0.0997896	4.3315	1.48094e-05	0.000389329
AFMID	644.564	-0.291362	0.162421	-1.79387	0.0728337	0.208291
AFP	4.42898	22.3046	6.55868	3.40077	NA	NA
AFTPH	1179.14	0.132443	0.0985251	1.34425	0.178867	0.373712
AGA	530.7	0.00876018	0.229055	0.0382449	0.969492	0.984152
AGAP1	1507.7	-0.284899	0.130676	-2.1802	0.0292426	0.110979
AGAP1-IT1	2.30849	2.65905	2.55857	1.03927	0.298679	NA
AGAP11	41.8698	-0.1271	0.610934	-0.208043	0.835196	0.919341
AGAP2	74.0513	-0.423155	0.425675	-0.994079	0.320184	0.536991
AGAP2-AS1	445.811	-0.697227	0.228898	-3.04602	0.00231894	0.0176464
AGAP3	6108.19	-0.706219	0.12634	-5.58983	2.27298e-08	1.9968e-06
AGAP4	239.555	0.243716	0.277713	0.877583	0.38017	0.596893
AGAP5	184.444	0.286964	0.324022	0.885631	0.375816	0.592985
AGAP6	741.931	-0.0160286	0.236594	-0.0677475	0.945987	0.973242
AGAP9	537.589	-0.023907	0.228207	-0.10476	0.916566	0.95908
AGBL2	0.351121	2.68631	6.59742	0.407175	0.683879	NA
AGBL3	58.7682	0.202243	0.361953	0.558755	0.576329	0.755085
AGBL4	10.724	0.372438	1.062	0.350696	0.725816	NA
AGBL5	6023.24	-0.185995	0.0990002	-1.87873	0.060281	0.18277
AGBL5-AS1	0.713762	-3.0562	4.79359	-0.63756	0.52376	NA
AGER	279.36	-0.245685	0.215977	-1.13755	0.255308	0.469001
AGFG1	3679.02	0.0796441	0.0759401	1.04878	0.294282	0.511936
AGFG2	584.235	0.00294867	0.185596	0.0158876	0.987324	0.99305
AGGF1	1686.12	1.41702e-05	0.128044	0.000110667	0.999912	0.999912
AGK	2100.84	0.143673	0.116972	1.22826	0.219348	0.426499
AGL	2495.44	0.348084	0.160206	2.17273	0.0298009	0.112315
AGMAT	65.5489	-0.341009	0.578124	-0.589854	0.555288	0.739665
AGMO	3.82843	-0.954441	2.39911	-0.397832	0.690754	NA
AGO1	1288.5	0.140455	0.113548	1.23697	0.216098	0.421742
AGO2	1947.68	-0.0495272	0.119504	-0.41444	0.678552	0.823824
AGO3	513.317	0.202281	0.175386	1.15335	0.248768	0.461893
AGO4	447.758	0.277791	0.165906	1.67438	0.0940551	0.247697
AGPAT1	2363.58	-0.0386231	0.113855	-0.339233	0.734435	0.858038
AGPAT2	2113.52	-0.28621	0.113891	-2.51301	0.0119705	0.0594518
AGPAT3	715.983	0.274339	0.16672	1.6455	0.099866	0.257175
AGPAT4	849.075	0.419344	0.159378	2.63113	0.00851021	0.0463704
AGPAT4-IT1	20.853	0.325471	0.947453	0.343522	0.731206	NA
AGPAT5	579.059	0.242701	0.154941	1.56642	0.117251	0.286269
AGPS	2959.27	0.240048	0.095079	2.52472	0.0115791	0.0582666
AGR2	0.522746	0	6.66256	0	1	NA
AGRN	2233.15	-0.116287	0.105285	-1.1045	0.269377	0.484353
AGT	0.983711	-0.145765	3.47558	-0.0419397	0.966547	NA
AGTPBP1	2480.67	0.262692	0.0913883	2.87446	0.00404723	0.0269445
AGTR1	44.8645	-0.309155	0.505172	-0.611979	0.540552	0.729125
AGTRAP	954.945	-0.0298278	0.150952	-0.197598	0.843359	0.922071
AHCTF1	1719.8	0.380297	0.122724	3.0988	0.00194308	0.0154458
AHCY	13602.1	-0.131803	0.0862921	-1.5274	0.126662	0.301044
AHCYL1	7040.96	0.0144256	0.0694437	0.20773	0.835439	0.919341
AHCYL2	280.315	0.529694	0.225999	2.34379	0.019089	0.0821836
AHDC1	1203.86	-0.556681	0.142045	-3.91904	8.89032e-05	0.00151249
AHI1	1107.79	0.150298	0.143771	1.0454	0.29584	0.513253
AHNAK	1176.74	0.0526784	0.191815	0.274632	0.783599	0.889808
AHNAK2	201.162	0.170752	0.23951	0.712921	0.475895	0.679959
AHR	458.352	0.153524	0.22049	0.696286	0.48625	0.688566
AHRR	463.881	-0.0250675	0.209726	-0.119525	0.904859	0.954006
AHSA1	8736.44	0.214541	0.0819278	2.61866	0.0088275	0.0476713
AHSA2	90.2957	0.365725	0.391676	0.933745	0.350435	0.568234
AHSG	0.54043	4.0497	6.57312	0.6161	0.537829	NA
AIDA	1117.46	0.0846081	0.0943155	0.897075	0.369679	0.587046
AIF1	0.492029	-3.57581	6.58461	-0.543055	0.587092	NA
AIF1L	2148.96	-0.30679	0.0999468	-3.06953	0.00214398	0.0166567
AIFM1	6771.29	0.374652	0.0780576	4.79969	1.58911e-06	6.65285e-05
AIFM2	82.2687	-0.446548	0.459959	-0.970843	0.331626	0.549283
AIFM3	3.59496	-1.60573	1.74426	-0.92058	0.35727	NA
AIG1	1675.71	-0.052061	0.0925109	-0.562755	0.573601	0.752869
AIM1	27.8917	-0.995099	0.580175	-1.71517	0.0863138	NA
AIM1L	43.2113	-0.135091	0.600913	-0.224809	0.822128	0.911816
AIMP1	1261.5	0.213292	0.133316	1.5999	0.109621	0.274084
AIMP2	5573.54	0.049149	0.0828765	0.593039	0.553155	0.738267
AIP	2050.68	-0.0821658	0.106861	-0.768906	0.441949	0.652443
AJUBA	435.778	-0.312807	0.273481	-1.1438	0.252709	0.465957
AK1	2521.65	-0.580866	0.120276	-4.82944	1.36917e-06	5.89847e-05
AK2	15119.9	0.00574131	0.0525444	0.109266	0.912992	0.958118
AK3	696.618	0.0744812	0.131555	0.56616	0.571285	0.751232
AK4	63.7509	-0.151976	0.317521	-0.478634	0.632199	0.794787
AK5	45.6969	-0.666085	0.572717	-1.16303	0.244819	0.457473
AK6	1354.71	0.246531	0.132534	1.86013	0.0628668	0.188121
AK7	30.3378	0.154583	0.674375	0.229224	0.818695	NA
AK8	61.4648	-0.234767	0.445994	-0.52639	0.598617	0.771524
AK9	106.757	0.570516	0.380015	1.5013	0.133278	0.310525
AKAP1	5952.58	-0.18519	0.0686835	-2.69628	0.00701191	0.0402854
AKAP10	792.263	0.256717	0.137089	1.87264	0.0611187	0.184419
AKAP11	1269.51	0.384207	0.151333	2.53882	0.0111228	0.0565023
AKAP12	3050.07	0.152703	0.12743	1.19832	0.230791	0.441009
AKAP13	1409.26	0.279863	0.135053	2.07224	0.0382429	0.133875
AKAP14	0.858316	-2.05584	6.00988	-0.342077	0.732293	NA
AKAP17A	2667.89	0.48088	0.123905	3.88104	0.00010401	0.00169811
AKAP2	706.877	0.0768781	0.149932	0.512752	0.608125	0.777173
AKAP3	70.2475	-0.0680968	0.431907	-0.157665	0.874721	0.938606
AKAP5	83.6912	-0.0506614	0.278889	-0.181654	0.855854	0.929135
AKAP6	93.6055	0.371752	0.47829	0.777252	0.43701	0.648979
AKAP7	377.884	0.0459255	0.178856	0.256774	0.797353	0.89809
AKAP8	2277.36	0.0741534	0.0657507	1.1278	0.259406	0.473598
AKAP8L	2931.89	0.21935	0.106054	2.06828	0.0386135	0.134854
AKAP9	1744.57	0.416684	0.165979	2.51046	0.0120575	0.0596844
AKIP1	556.615	-0.0264641	0.125397	-0.211043	0.832854	0.917838
AKIRIN1	1745.97	-0.0963692	0.139357	-0.691526	0.489235	0.691159
AKIRIN2	1736.67	-0.239361	0.104908	-2.28164	0.0225108	0.0917961
AKNA	506.346	-0.441239	0.215328	-2.04914	0.040448	0.138865
AKNAD1	0.623015	-3.59498	6.58426	-0.545996	0.585069	NA
AKR1A1	1782.57	0.119719	0.11211	1.06788	0.285576	0.50242
AKR1B1	7422.36	0.0271248	0.0708496	0.382851	0.70183	0.837618
AKR1C1	6.81435	-0.314538	1.2866	-0.244473	0.806865	NA
AKR1C2	11.3939	-0.397393	1.15107	-0.345238	0.729916	NA
AKR1C3	3.27484	0.709411	1.97082	0.359957	0.718879	NA
AKR7A2	2842.46	-0.12723	0.0978626	-1.30008	0.193572	0.393658
AKR7A3	20.8022	0.460776	0.844663	0.545515	0.5854	NA
AKT1	3871.26	-0.01735	0.105908	-0.163821	0.869872	0.935897
AKT1S1	3794.78	-0.693328	0.13345	-5.19542	2.0426e-07	1.19122e-05
AKT2	4746.84	-0.503107	0.104607	-4.80951	1.51304e-06	6.37435e-05
AKT3	668.596	0.146501	0.170861	0.857427	0.391209	0.607158
AKTIP	116.152	0.395876	0.257886	1.53508	0.124764	0.297805
ALAD	424.407	-0.16764	0.149131	-1.12412	0.260964	0.475628
ALAS1	3219.21	-0.0044256	0.0823715	-0.0537274	0.957152	0.978613
ALB	1.30042	4.30221	3.69277	1.16504	0.244004	NA
ALCAM	1125	0.167706	0.110568	1.51677	0.129325	0.304767
ALDH16A1	1426.35	-0.166375	0.132577	-1.25493	0.209503	0.412792
ALDH18A1	7605.34	0.185083	0.0789931	2.34302	0.0191283	0.0822731
ALDH1A1	4.49864	-2.38355	1.63587	-1.45705	0.145103	NA
ALDH1A2	1157.61	0.286603	0.153627	1.86558	0.0621001	0.186538
ALDH1A3	29.9884	0.087669	0.703032	0.124701	0.90076	NA
ALDH1B1	3548.19	-0.407716	0.095677	-4.26138	2.03169e-05	0.000501539
ALDH1L1	13.3658	0.247111	0.94391	0.261795	0.79348	NA
ALDH1L1-AS2	1.12712	0.438678	3.46582	0.126573	0.899279	NA
ALDH1L2	2538.65	0.443592	0.117789	3.766	0.000165884	0.00242915
ALDH2	2736.41	-0.0626282	0.0942189	-0.664709	0.506237	0.705567
ALDH3A1	44.5102	-0.419032	0.599178	-0.699345	0.484336	0.687316
ALDH3A2	2248.31	0.0894761	0.103148	0.867454	0.385693	0.601674
ALDH3B1	6.6839	0.096696	1.25161	0.0772572	0.938419	NA
ALDH3B2	0.577398	-4.59462	6.571	-0.699227	0.48441	NA
ALDH4A1	990.886	0.0766714	0.134036	0.57202	0.567308	0.748508
ALDH5A1	587.239	-0.285375	0.170513	-1.67363	0.094203	0.247843
ALDH6A1	583.727	0.208359	0.171511	1.21484	0.224425	0.433184
ALDH7A1	1442.9	0.409207	0.113003	3.6212	0.000293234	0.00386207
ALDH8A1	17.7853	0.233597	0.870904	0.268223	0.788528	NA
ALDH9A1	3087.8	0.239744	0.0990755	2.41981	0.0155288	0.0712179
ALDOA	75838	-0.181197	0.0892331	-2.0306	0.0422953	0.143063
ALDOB	1.13301	1.30688	3.10867	0.420398	0.674195	NA
ALDOC	555.347	-0.293452	0.19397	-1.51288	0.130311	0.306121
ALG1	2256.47	0.0502944	0.0760839	0.661038	0.508588	0.707299
ALG10	186.438	0.570547	0.232267	2.45643	0.0140326	0.0661127
ALG10B	122.995	-0.160134	0.3006	-0.532714	0.594231	0.767946
ALG11	392.595	0.464018	0.168092	2.7605	0.00577132	0.0348603
ALG12	1738.24	0.105516	0.117012	0.901754	0.367188	0.584798
ALG13	4546.04	-0.271087	0.0945279	-2.8678	0.00413334	0.027463
ALG14	1157.38	-0.0528479	0.134432	-0.393119	0.694231	0.833315
ALG1L	54.1279	-0.442018	0.396971	-1.11348	0.265504	0.480853
ALG1L2	11.4435	-0.248666	0.754352	-0.329642	0.74167	NA
ALG2	1812.38	0.611816	0.0886028	6.90516	5.01485e-12	1.33947e-09
ALG3	5545.68	-0.588294	0.137529	-4.27759	1.88926e-05	0.000476057
ALG5	1885.86	0.0232139	0.118861	0.195302	0.845157	0.923127
ALG6	1776.83	0.10112	0.109	0.927701	0.353563	0.571028
ALG8	4559.28	0.18451	0.0728944	2.53119	0.0113677	0.0575058
ALG9	765.183	0.19838	0.136199	1.45655	0.145241	0.327228
ALK	0.895111	4.84161	6.47052	0.748257	0.454305	NA
ALKBH1	1109.77	0.0858691	0.110378	0.777953	0.436597	0.64851
ALKBH2	418.168	0.127777	0.182951	0.698421	0.484914	0.687695
ALKBH3	917.742	0.157143	0.128739	1.22064	0.222223	0.429802
ALKBH3-AS1	2.97129	0.828895	1.7756	0.466826	0.640624	NA
ALKBH4	732.284	-0.151943	0.14987	-1.01383	0.310663	0.526845
ALKBH5	1515.59	-0.0235897	0.100452	-0.234836	0.814336	0.90712
ALKBH6	615.635	-0.256736	0.129974	-1.97528	0.0482359	0.156623
ALKBH7	1032.95	-0.421603	0.140024	-3.01094	0.00260441	0.0193282
ALKBH8	1058.49	0.180569	0.129813	1.39099	0.164228	0.353752
ALLC	0.331581	3.67198	6.57775	0.558243	0.576678	NA
ALMS1	2882.29	0.179448	0.0929631	1.93032	0.0535674	0.168048
ALMS1-IT1	18.4448	0.856954	0.770648	1.11199	0.266142	NA
ALOX12	52.5858	-1.26643	0.409784	-3.09047	0.0019984	0.0157794
ALOX12-AS1	35.7368	-0.806129	0.517661	-1.55725	0.119411	NA
ALOX12B	5.77298	-1.50196	1.48408	-1.01205	0.311515	NA
ALOX15	0.836875	-2.59571	5.59378	-0.464035	0.642623	NA
ALOX15B	7.94614	-0.0153259	1.25447	-0.012217	0.990252	NA
ALOX5	13.8312	0.205854	1.01744	0.202325	0.839663	NA
ALOXE3	66.2444	-0.456244	0.558768	-0.816517	0.414205	0.628669
ALPK1	167.697	0.116312	0.24365	0.477374	0.633096	0.795051
ALPK2	5.06855	-0.753467	1.97906	-0.38072	0.703411	NA
ALPK3	9.00429	0.817273	1.03212	0.791835	0.428457	NA
ALPL	173.944	0.0250451	0.266017	0.0941488	0.924991	0.96336
ALPPL2	0.452831	0	6.66256	0	1	NA
ALS2	1553.03	0.486098	0.0999857	4.86168	1.16394e-06	5.09652e-05
ALS2CL	27.7222	0.00435274	0.699396	0.00622356	0.995034	NA
ALS2CR11	1.41551	2.31426	3.97194	0.582652	0.560128	NA
ALS2CR12	7.03391	-1.7014	1.48033	-1.14934	0.250416	NA
ALX1	419.263	-0.0992202	0.208082	-0.476832	0.633482	0.795351
ALX3	31.0976	-0.339143	0.526424	-0.644239	0.51942	NA
ALX4	394.109	-0.551914	0.19127	-2.88553	0.0039076	0.0261978
ALYREF	9589.35	-0.0856884	0.127651	-0.671271	0.502048	0.702114
AMACR	56.1107	0.145278	0.38691	0.375483	0.707301	0.841509
AMBN	39.1885	-0.652612	0.640916	-1.01825	0.30856	0.524878
AMBRA1	3346.61	-0.184257	0.0959682	-1.91998	0.05486	0.171141
AMD1	8771.04	0.123659	0.123467	1.00155	0.316559	0.532986
AMDHD1	10.6252	0.666083	1.26087	0.528272	0.597311	NA
AMDHD2	742.436	-0.424407	0.134557	-3.1541	0.00160996	0.0134214
AMELX	0.76005	-3.01025	6.59749	-0.456273	0.648194	NA
AMER1	685.513	0.190925	0.153295	1.24547	0.212958	0.41769
AMER2	2.83599	0.066596	1.78749	0.0372567	0.97028	NA
AMFR	2240.53	0.31611	0.0914363	3.45716	0.000545892	0.00600526
AMH	347.551	-0.392207	0.249907	-1.56942	0.116551	0.28525
AMHR2	151.651	-0.319846	0.317606	-1.00705	0.313909	0.530128
AMIGO1	202.899	-0.426503	0.216832	-1.96697	0.0491867	0.158826
AMIGO2	25.6848	-0.884221	0.700055	-1.26307	0.206563	NA
AMIGO3	451.57	0.399264	0.179661	2.22231	0.026262	0.102944
AMMECR1	574.773	-0.0194448	0.184488	-0.105399	0.91606	0.95908
AMMECR1L	838.35	0.13719	0.170846	0.803003	0.421973	0.635635
AMN	2.49197	-1.63837	1.5967	-1.0261	0.304846	NA
AMN1	322.708	-0.00934396	0.209723	-0.0445538	0.964463	0.98161
AMOT	23773.4	-0.171634	0.115151	-1.49052	0.136089	0.314277
AMOTL1	2591.12	0.0446836	0.117788	0.379357	0.704423	0.839378
AMOTL2	679.737	-0.135608	0.162441	-0.834816	0.403821	0.618964
AMPD1	5.88848	-0.175341	2.18887	-0.0801057	0.936153	NA
AMPD2	3920.56	-0.00334505	0.109924	-0.0304305	0.975724	0.987264
AMPD3	20.9266	-0.182069	0.894162	-0.203619	0.838651	NA
AMPH	480.07	-0.177523	0.148237	-1.19756	0.231087	0.441196
AMT	13.6128	0.0156051	1.07993	0.0144502	0.988471	NA
AMY1A	1.36985	2.05505	2.65992	0.772596	0.439761	NA
AMY1B	1.51029	-0.994405	2.82509	-0.35199	0.724846	NA
AMY2A	3.34519	0.503373	1.95008	0.25813	0.796307	NA
AMY2B	11.6469	0.231	1.02987	0.224301	0.822523	NA
AMZ1	0.997694	-1.99457	4.14875	-0.480764	0.630684	NA
AMZ2	5648.69	-0.160913	0.0808856	-1.98939	0.0466577	0.153325
ANAPC1	5736.32	0.0756916	0.0766161	0.987933	0.323185	0.540531
ANAPC10	646.234	-0.164749	0.149746	-1.10019	0.27125	0.486705
ANAPC11	1102.12	-0.0747831	0.131582	-0.568337	0.569806	0.750153
ANAPC13	410.126	-0.0193152	0.171182	-0.112834	0.910162	0.957043
ANAPC15	1497.73	-0.0976682	0.123029	-0.793862	0.427276	0.639941
ANAPC16	1692.5	-0.00243399	0.113069	-0.0215266	0.982826	0.990539
ANAPC2	2344.97	-0.32064	0.0891781	-3.5955	0.000323766	0.00414026
ANAPC4	877.752	0.192118	0.134196	1.43162	0.152252	0.336658
ANAPC5	7420.43	0.071211	0.0754553	0.94375	0.345297	0.56354
ANAPC7	4369.46	0.0321953	0.073866	0.43586	0.662938	0.814969
ANG	31.2755	0.151371	0.535685	0.282574	0.777503	NA
ANGEL1	1107.45	-0.0473733	0.147175	-0.321885	0.74754	0.866881
ANGEL2	1176.29	0.196771	0.12492	1.57517	0.115216	0.283529
ANGPT1	14.2639	-0.30636	0.7086	-0.432345	0.665491	NA
ANGPT2	3.05542	2.05514	2.55256	0.80513	0.420745	NA
ANGPT4	0.511079	-4.96374	6.568	-0.755746	0.449801	NA
ANGPTL1	1.31773	0.790444	3.57708	0.220975	0.825112	NA
ANGPTL2	1.90432	0.846052	2.47047	0.342466	0.732	NA
ANGPTL3	0.787785	-2.05517	5.19792	-0.395384	0.692559	NA
ANGPTL4	3.92244	0.431479	1.64465	0.262352	0.79305	NA
ANGPTL6	15.6839	-0.212935	0.857869	-0.248214	0.803969	NA
ANGPTL7	0.359186	-2.6109	6.61013	-0.394985	0.692854	NA
ANGPTL8	2.88385	0.674411	1.6331	0.412964	0.679633	NA
ANK1	87.2851	-0.0578897	0.32806	-0.176461	0.859932	0.931419
ANK2	659.135	0.538383	0.140906	3.82086	0.000132987	0.00204612
ANK3	904.954	0.0357305	0.126843	0.281691	0.77818	0.885758
ANKAR	71.8541	0.190509	0.476954	0.399429	0.689577	0.829559
ANKDD1A	13.8995	-0.0450295	0.839162	-0.05366	0.957206	NA
ANKDD1B	0.573894	-2.02447	6.14646	-0.329372	0.741874	NA
ANKEF1	211.954	0.406338	0.266817	1.52291	0.127781	0.302467
ANKFN1	6.87968	1.45045	1.47633	0.982471	0.325868	NA
ANKFY1	4923.18	0.123067	0.0712845	1.72642	0.0842723	0.230061
ANKH	839.229	-0.107048	0.155884	-0.686715	0.492262	0.69377
ANKHD1	1646.87	0.00476914	0.307546	0.0155071	0.987628	0.993145
ANKHD1-EIF4EBP3	7173.95	-0.0520314	0.0844757	-0.615934	0.537938	0.727988
ANKIB1	1146.76	0.250271	0.143083	1.74914	0.0802675	0.222401
ANKK1	1.23106	-1.14982	6.4997	-0.176904	0.859584	NA
ANKLE1	44.0192	0.510265	0.553303	0.922217	0.356415	0.573878
ANKLE2	5050.17	0.119395	0.0760941	1.56904	0.116639	0.285399
ANKMY1	244.281	0.331209	0.22358	1.48139	0.138503	0.318092
ANKMY2	390.688	0.436014	0.178021	2.44923	0.0143162	0.0671088
ANKRA2	209.357	-0.111667	0.277571	-0.402301	0.687463	0.828536
ANKRD1	9.2737	1.49695	0.98449	1.52054	0.128376	NA
ANKRD10	436.73	0.0999095	0.189403	0.527496	0.597849	0.770981
ANKRD11	6153.14	0.137557	0.0874314	1.57332	0.115645	0.284165
ANKRD12	486.929	0.0242182	0.228562	0.105959	0.915615	0.958987
ANKRD13A	1057.92	0.239156	0.127734	1.8723	0.0611657	0.18452
ANKRD13B	1619.59	-0.54932	0.131897	-4.16477	3.11671e-05	0.000692185
ANKRD13C	1824	0.114364	0.105045	1.08872	0.276279	0.492529
ANKRD13D	698.524	-0.152139	0.175053	-0.869105	0.38479	0.600747
ANKRD16	320.749	0.114507	0.171629	0.667177	0.504659	0.704108
ANKRD17	10061.3	0.0787119	0.102433	0.76842	0.442238	0.652606
ANKRD18A	270.427	0.463432	0.241164	1.92165	0.0546503	0.170806
ANKRD18B	428.407	0.288968	0.152168	1.89901	0.0575632	0.176888
ANKRD2	1.4562	4.28488	6.57079	0.65211	0.51433	NA
ANKRD20A1	13.0029	1.25902	0.80305	1.56779	0.116929	NA
ANKRD20A2	10.7581	0.00722886	0.903836	0.00799797	0.993619	NA
ANKRD20A3	11.255	1.31002	0.822277	1.59316	0.111124	NA
ANKRD20A4	14.7527	0.390417	0.848686	0.460026	0.645498	NA
ANKRD23	40.1776	0.147389	0.637759	0.231105	0.817233	0.908755
ANKRD24	67.746	-0.29682	0.413407	-0.717985	0.472767	0.677256
ANKRD26	802.744	0.103874	0.189678	0.547634	0.583943	0.76002
ANKRD27	1661.15	0.290904	0.107358	2.70967	0.00673505	0.0390563
ANKRD28	1666.55	0.175346	0.116535	1.50467	0.132409	0.309039
ANKRD29	46.4567	-0.0418001	0.58445	-0.0715204	0.942984	0.971777
ANKRD30A	0.36893	0	6.66256	0	1	NA
ANKRD31	41.49	0.22761	0.505449	0.450312	0.652486	0.808194
ANKRD33B	51.7405	-0.518076	0.593728	-0.872583	0.382891	0.599614
ANKRD34A	106.441	-0.586117	0.293132	-1.9995	0.0455543	0.150402
ANKRD34B	62.4045	-0.0303283	0.471854	-0.0642747	0.948752	0.97466
ANKRD35	1.21892	2.29852	6.60964	0.347752	0.728026	NA
ANKRD36	151.255	-0.171505	0.287095	-0.59738	0.550254	0.736189
ANKRD36B	156.306	0.281426	0.304037	0.925631	0.354638	0.572131
ANKRD36C	80.0562	1.15815	0.362128	3.19819	0.00138292	0.0120712
ANKRD37	16.3992	-3.01609	1.02784	-2.93439	0.00334206	NA
ANKRD39	543.336	-0.299062	0.138453	-2.16002	0.0307714	0.114823
ANKRD40	1540.37	0.0659844	0.132062	0.499646	0.617324	0.784431
ANKRD42	282.31	0.233497	0.234438	0.995988	0.319256	0.536108
ANKRD44	168.619	-0.121856	0.23592	-0.516516	0.605494	0.775503
ANKRD45	1.39853	2.67337	3.41696	0.782385	0.433989	NA
ANKRD46	486.509	0.313566	0.210236	1.4915	0.135831	0.313792
ANKRD49	189.747	0.237894	0.252675	0.941504	0.346446	0.564587
ANKRD50	482.29	0.238301	0.170028	1.40154	0.161052	0.348937
ANKRD52	2504	0.249373	0.125445	1.9879	0.0468223	0.153753
ANKRD53	5.3289	1.54554	1.53451	1.00719	0.313844	NA
ANKRD54	2276.87	-0.017842	0.0869791	-0.20513	0.837471	0.919971
ANKRD6	305.484	-0.201233	0.269046	-0.747951	0.45449	0.66261
ANKRD61	13.0992	1.13023	1.11502	1.01364	0.310753	NA
ANKRD63	7.36032	-0.747041	1.12564	-0.663657	0.50691	NA
ANKRD65	0.541609	0.79938	6.29324	0.127022	0.898923	NA
ANKRD7	19.639	-0.49729	0.735609	-0.676025	0.499025	NA
ANKRD9	478.51	-0.625298	0.16133	-3.87588	0.00010624	0.00172398
ANKS1A	2727.81	0.10185	0.10119	1.00652	0.314163	0.53029
ANKS1B	28.0524	-0.181734	0.75842	-0.239622	0.810623	NA
ANKS3	489.114	0.278795	0.179753	1.55099	0.120904	0.291876
ANKS6	1767.54	-0.0172818	0.0977709	-0.176758	0.859699	0.931419
ANKZF1	1135.24	-0.00750545	0.15829	-0.0474159	0.962182	0.980687
ANLN	6351.84	0.183943	0.0809845	2.27133	0.0231269	0.0935654
ANO1	6.2272	1.70718	1.66006	1.02838	0.303769	NA
ANO10	1033.4	0.232438	0.116723	1.99136	0.0464414	0.152745
ANO2	6.21376	1.21301	1.43979	0.842491	0.399513	NA
ANO4	71.2869	-0.302877	0.443497	-0.682928	0.494653	0.695963
ANO5	409.075	0.307184	0.199183	1.54222	0.123021	0.295016
ANO6	1179.81	0.461837	0.187309	2.46565	0.0136766	0.0648619
ANO7	90.4826	-1.03528	0.391973	-2.6412	0.00826125	0.0453751
ANO7P1	11.5503	-0.158736	1.03666	-0.153123	0.878301	NA
ANO8	627.567	-0.357026	0.185538	-1.92427	0.0543202	0.170109
ANO9	1.86928	-3.01161	3.06932	-0.981199	0.326495	NA
ANOS1	2.85106	-1.64368	2.69042	-0.610937	0.541241	NA
ANP32A	11055.9	0.12516	0.0960409	1.3032	0.192507	0.39215
ANP32A-IT1	4.81157	-0.586306	1.92898	-0.303946	0.761169	NA
ANP32B	10352.6	0.2184	0.136442	1.60068	0.109447	0.273905
ANP32C	602.756	0.148234	0.170123	0.871332	0.383573	0.600119
ANP32D	0.842038	-2.0061	2.79786	-0.717012	0.473367	NA
ANP32E	2872.74	0.215407	0.17627	1.22203	0.221695	0.429061
ANPEP	4.79868	3.60597	1.9698	1.83062	0.0671568	NA
ANTXR1	821.275	-0.194213	0.185565	-1.0466	0.295283	0.512809
ANTXR2	174.348	0.201783	0.312541	0.645618	0.518527	0.713909
ANXA1	70.0547	0.0198553	0.48016	0.0413514	0.967016	0.983362
ANXA11	4097.59	-0.349852	0.0966798	-3.61867	0.00029612	0.00387645
ANXA2	1111.41	-0.332181	0.119061	-2.79002	0.00527047	0.0327382
ANXA2R	14.7658	-0.199568	0.924509	-0.215864	0.829094	NA
ANXA3	58.0497	0.0309922	0.371201	0.0834916	0.933461	0.967367
ANXA4	269.923	0.0460828	0.182653	0.252296	0.800812	0.900273
ANXA5	5812.13	0.319117	0.132758	2.40375	0.0162279	0.073494
ANXA6	5472.19	0.280168	0.0919776	3.04604	0.00231876	0.0176464
ANXA7	2882.14	0.178849	0.0799196	2.23786	0.0252304	0.0999858
ANXA8	3.76863	2.16086	1.20535	1.79273	0.0730164	NA
ANXA9	17.8752	0.20804	0.68488	0.303761	0.76131	NA
AOAH	0.445682	0	6.66256	0	1	NA
AOC2	99.2126	-0.369837	0.327913	-1.12785	0.259383	0.473598
AOC3	39.7381	-0.267507	0.477635	-0.560065	0.575435	0.75446
AOX1	1.61119	-2.64176	6.60902	-0.399721	0.689362	NA
AP1AR	1276.15	0.23631	0.126244	1.87186	0.0612261	0.184591
AP1B1	13705.3	-0.136571	0.0796464	-1.71471	0.0863978	0.234188
AP1G1	3468.82	0.317787	0.105914	3.00041	0.00269618	0.0197843
AP1G2	913.051	-0.107464	0.205133	-0.523875	0.600366	0.772659
AP1M1	3174.71	-0.129505	0.0819752	-1.5798	0.114152	0.281741
AP1S1	695.228	0.103459	0.172423	0.600031	0.548486	0.73456
AP1S2	3917.47	-0.164296	0.0972047	-1.69021	0.0909876	0.242543
AP1S3	718.241	0.250969	0.149858	1.67471	0.0939906	0.247583
AP2A1	7231.95	-0.202065	0.0711754	-2.83897	0.00452596	0.0294419
AP2A2	7397.03	-0.0350172	0.0575609	-0.60835	0.542955	0.73007
AP2B1	6245.23	0.238351	0.111598	2.1358	0.032696	0.119993
AP2M1	17723.5	-0.200062	0.0861779	-2.3215	0.0202597	0.0855306
AP2S1	4247.1	-0.134432	0.113049	-1.18915	0.234381	0.444741
AP3B1	3225.94	0.353508	0.0934273	3.78377	0.000154468	0.00230841
AP3B2	161.796	-0.0163179	0.229336	-0.0711526	0.943276	0.971841
AP3D1	16998	0.0541204	0.0691452	0.782706	0.4338	0.645851
AP3M1	6788.05	0.175374	0.07652	2.29187	0.0219129	0.0902117
AP3M2	1586.09	0.141939	0.104286	1.36106	0.173495	0.366332
AP3S1	1223.96	-0.0318478	0.122985	-0.258957	0.795669	0.897176
AP3S2	3277.73	-0.0606183	0.0714879	-0.847951	0.396465	0.612469
AP4B1	593.497	0.186278	0.129488	1.43858	0.15027	0.33431
AP4B1-AS1	85.3305	-0.00836287	0.357288	-0.0234065	0.981326	0.989981
AP4E1	702.185	0.18567	0.126994	1.46203	0.143732	0.325125
AP4M1	304.258	-0.0303178	0.186206	-0.162819	0.870661	0.936283
AP4S1	46.5156	0.454453	0.613431	0.740838	0.458792	0.665273
AP5B1	1894.37	-0.348076	0.124616	-2.79319	0.00521917	0.0324951
AP5M1	1716.69	0.322371	0.104041	3.09849	0.00194509	0.0154458
AP5S1	362.467	-0.179461	0.237596	-0.75532	0.450057	0.659048
AP5Z1	944.711	-0.0550482	0.128678	-0.427798	0.668798	0.81853
APAF1	557.644	0.222451	0.20285	1.09663	0.272804	0.48864
APBA1	20.1385	-0.203247	0.678718	-0.299458	0.764591	NA
APBA2	1514.53	-0.115695	0.0952722	-1.21436	0.224609	0.433283
APBA3	971.601	-0.228424	0.148253	-1.54077	0.123373	0.295647
APBB1	2930.95	-0.331282	0.068797	-4.81536	1.46937e-06	6.22965e-05
APBB2	589.696	-0.0245869	0.14926	-0.164725	0.869161	0.935793
APBB3	179.737	0.194699	0.314063	0.619935	0.535301	0.726297
APC	2986.62	0.306551	0.122294	2.50668	0.0121872	0.0601189
APC2	104.036	-0.227522	0.282081	-0.806583	0.419907	0.634158
APCDD1	149.393	-0.68151	0.288544	-2.3619	0.0181817	0.0794818
APCDD1L-AS1	2.68624	3.03173	2.89572	1.04697	0.295114	NA
APEH	3963.79	-0.0652003	0.0771925	-0.844646	0.398309	0.614109
APEX1	13753.1	-0.192693	0.104845	-1.8379	0.0660774	0.194204
APEX2	2585.42	-0.0520667	0.0832846	-0.625166	0.531862	0.723837
APH1A	7992.23	-0.416811	0.10757	-3.87477	0.000106727	0.00172559
APH1B	54.497	-0.355959	0.563269	-0.631952	0.527418	0.719917
API5	8923.32	0.0274076	0.0676835	0.404938	0.685523	0.827398
APIP	833.648	-0.170526	0.150064	-1.13635	0.255809	0.469432
APITD1	358.481	0.299231	0.180149	1.66102	0.0967098	0.252305
APITD1-CORT	240.003	0.111841	0.213895	0.522876	0.601061	0.772883
APLF	134.211	0.040218	0.265428	0.151521	0.879564	0.941082
APLN	14.6767	-1.81721	0.596177	-3.04811	0.00230285	NA
APLP1	473.944	-0.529779	0.169124	-3.13249	0.00173333	0.0141516
APLP2	23173.2	0.0351357	0.0961282	0.365509	0.714732	0.845834
APMAP	3973.43	0.0706815	0.0699555	1.01038	0.312314	0.528587
APOA1	4.78739	1.14851	1.68351	0.682213	0.495104	NA
APOA2	2.62137	0.690891	5.05523	0.136669	0.891293	NA
APOA4	2.57852	7.13744	6.55945	1.08812	NA	NA
APOB	2.06529	3.80025	3.117	1.2192	0.222768	NA
APOBEC2	0.781645	1.11408	4.30031	0.259069	0.795582	NA
APOBEC3A	2.57384	0.38606	1.45702	0.264966	0.791036	NA
APOBEC3B	96.4854	0.274634	0.279293	0.983318	0.325451	0.543096
APOBEC3B-AS1	12.1538	-0.212092	0.660434	-0.32114	0.748104	NA
APOBEC3C	330.276	-0.407381	0.16394	-2.48494	0.0129573	0.0626151
APOBEC3D	22.8634	0.352674	0.585134	0.602724	0.546692	NA
APOBEC3F	93.9899	-0.415156	0.292409	-1.41978	0.155672	0.340988
APOBEC3G	7.41871	-0.103982	1.0474	-0.0992768	0.920919	NA
APOBEC3H	0.966761	3.84679	5.12522	0.75056	0.452918	NA
APOBR	5.3959	0.161527	1.46747	0.110072	0.912352	NA
APOC1	778.732	-0.232778	0.117605	-1.97932	0.0477798	0.155565
APOC3	0.667381	5.18746	6.56467	0.790209	0.429406	NA
APOC4-APOC2	0.60154	4.1872	6.57171	0.637156	0.524023	NA
APOD	2.90005	-1.43892	1.7815	-0.807699	0.419264	NA
APOE	49.1682	0.435055	0.45202	0.962469	0.335814	0.55361
APOL2	189.817	0.241105	0.215638	1.1181	0.263523	0.478393
APOLD1	22.2729	-0.388684	0.803518	-0.483728	0.628579	NA
APOM	376.398	0.109582	0.152229	0.71985	0.471617	0.676234
APOO	886.343	0.000864391	0.112057	0.00771383	0.993845	0.996232
APOOL	322.811	0.343346	0.254113	1.35115	0.176647	0.370872
APOPT1	1149.82	0.00231974	0.149762	0.0154895	0.987642	0.993145
APP	16192.1	0.0782215	0.0665475	1.17542	0.239825	0.451998
APPBP2	987.085	0.257512	0.125215	2.05656	0.039729	0.137314
APPL1	2189.59	0.0396099	0.131527	0.301153	0.763298	0.876437
APPL2	1026.64	-0.0558707	0.139893	-0.399382	0.689612	0.829559
APRT	8301.23	-0.238356	0.103049	-2.31305	0.0207201	0.086718
APTR	395.044	0.132601	0.196082	0.676257	0.498878	0.699183
APTX	1776.81	0.212778	0.11915	1.78579	0.0741328	0.210827
AQP1	2.21842	-1.9023	2.67851	-0.710208	0.477575	NA
AQP11	44.5941	-0.760979	0.472589	-1.61023	0.107347	0.270051
AQP12B	0.400959	0	6.66256	0	1	NA
AQP3	111.874	-0.685569	0.405771	-1.68955	0.0911147	0.242736
AQP4	5.26862	-0.798205	1.93302	-0.412932	0.679657	NA
AQP4-AS1	1.07421	-1.124	5.19552	-0.216341	0.828722	NA
AQP5	0.647065	0	5.44633	0	1	NA
AQP6	1.42701	-2.9517	3.75397	-0.786289	0.431698	NA
AQP7	2.4645	-0.53844	2.44861	-0.219896	0.825952	NA
AQP7P5	1.92033	-1.00632	2.41536	-0.416633	0.676947	NA
AQR	2919.57	0.113376	0.0921401	1.23047	0.218521	0.425353
AR	352.743	0.333958	0.2486	1.34336	0.179156	0.374024
ARAF	4527.55	-0.638138	0.126467	-5.0459	4.51387e-07	2.22446e-05
ARAP1	2406.84	-0.18424	0.0939298	-1.96147	0.0498244	0.160171
ARAP2	257.443	0.273998	0.250604	1.09335	0.27424	0.490074
ARAP3	115.928	-0.369918	0.384434	-0.96224	0.335929	0.553625
ARC	211.228	-2.71412	0.958352	-2.83207	0.0046248	0.0298955
ARCN1	5073.84	0.474887	0.097518	4.86973	1.1175e-06	4.92548e-05
AREG	5.03774	-0.07426	1.53535	-0.0483669	0.961424	NA
AREL1	1555.21	0.168781	0.118673	1.42223	0.15496	0.339929
ARF1	24087.1	0.137885	0.0836153	1.64903	0.0991405	0.256097
ARF3	4692.31	-0.47653	0.112761	-4.22602	2.3786e-05	0.000569286
ARF4	1741.15	0.505865	0.110002	4.59868	4.25171e-06	0.000145968
ARF4-AS1	11.4242	0.0025461	0.971036	0.00262205	0.997908	NA
ARF5	7178.52	-0.447104	0.127005	-3.52037	0.000430952	0.00504857
ARF6	1914.61	0.0326536	0.104158	0.313501	0.7539	0.87052
ARFGAP1	3733.35	0.0823694	0.0969868	0.849285	0.395723	0.611783
ARFGAP2	2466.03	0.218618	0.0871638	2.50812	0.0121375	0.0599467
ARFGAP3	1132.36	0.476362	0.10768	4.42385	9.6957e-06	0.00027668
ARFGEF1	1904.87	0.133852	0.100292	1.33462	0.182001	0.377601
ARFGEF2	1644.53	0.425515	0.130756	3.25428	0.0011368	0.0104848
ARFGEF3	846.467	0.409539	0.13513	3.03071	0.00243983	0.0183778
ARFIP1	888.614	0.273002	0.146849	1.85906	0.0630189	0.18845
ARFIP2	6361.53	0.269331	0.0706795	3.81059	0.000138635	0.00211114
ARFRP1	574.83	0.0194905	0.177231	0.109972	0.912432	0.958034
ARG1	0.99982	-0.166964	4.20305	-0.0397244	0.968313	NA
ARG2	1365.09	0.11695	0.124454	0.939706	0.347368	0.565675
ARGLU1	1620.61	0.207729	0.194638	1.06726	0.285855	0.502712
ARHGAP1	1016.23	-0.321738	0.128261	-2.50846	0.012126	0.0599122
ARHGAP10	1015.85	-0.154161	0.143762	-1.07233	0.283571	0.500409
ARHGAP11A	1863.24	0.371798	0.108298	3.43312	0.000596688	0.00646291
ARHGAP11B	126.581	0.896047	0.297003	3.01696	0.00255327	0.0190178
ARHGAP12	506.142	0.292986	0.175959	1.66508	0.0958963	0.250969
ARHGAP17	5713.45	-0.465847	0.104602	-4.45351	8.44792e-06	0.000248964
ARHGAP18	354.42	0.242324	0.168178	1.44087	0.14962	0.333382
ARHGAP19	46.3497	-17.8318	6.58976	-2.70599	NA	NA
ARHGAP19-SLIT1	833.821	0.316676	0.432392	0.732381	0.463936	0.669692
ARHGAP20	173.333	-0.582118	0.565826	-1.02879	0.303577	0.520646
ARHGAP21	3712.15	0.147086	0.0948002	1.55153	0.120774	0.291722
ARHGAP22	580.985	-0.319433	0.156372	-2.04278	0.0410746	0.140187
ARHGAP23	31.8984	-0.699041	0.57681	-1.21191	0.225548	NA
ARHGAP24	68.3132	0.00966009	0.393539	0.0245467	0.980416	0.989427
ARHGAP25	6.90581	0.295767	1.57445	0.187854	0.850991	NA
ARHGAP26	931.3	-0.0474327	0.125096	-0.37917	0.704562	0.839378
ARHGAP27	328.034	-0.232101	0.206628	-1.12328	0.261317	0.475916
ARHGAP28	88.1913	-0.483619	0.349395	-1.38416	0.166309	0.356854
ARHGAP29	915.444	0.0506196	0.126425	0.400391	0.688868	0.829337
ARHGAP30	34.3024	-0.946582	0.565078	-1.67514	0.0939076	NA
ARHGAP31	276.451	-0.037573	0.186786	-0.201156	0.840577	0.92144
ARHGAP31-AS1	6.83082	-0.893759	0.987149	-0.905393	0.365257	NA
ARHGAP32	1082.4	-0.0511154	0.141818	-0.36043	0.718525	0.848369
ARHGAP33	349.634	-0.597623	0.211444	-2.82638	0.00470767	0.0302608
ARHGAP35	2427.99	0.043303	0.103929	0.41666	0.676927	0.822898
ARHGAP39	1153.49	-0.114919	0.124808	-0.920771	0.35717	0.574423
ARHGAP4	49.4982	-0.197166	0.611283	-0.322545	0.74704	0.866486
ARHGAP40	4.34964	-0.754587	1.80244	-0.418648	0.675473	NA
ARHGAP42	123.141	0.190785	0.287566	0.663448	0.507043	0.706107
ARHGAP44	948.913	-0.10491	0.115814	-0.90585	0.365015	0.582898
ARHGAP5	2098.48	0.265476	0.13155	2.01805	0.0435856	0.145813
ARHGAP5-AS1	153.24	-0.236538	0.201514	-1.1738	0.240473	0.452454
ARHGAP6	4.23008	-1.52872	1.64703	-0.928166	0.353321	NA
ARHGAP8	204.782	1.65438	1.8229	0.907554	0.364114	0.581885
ARHGAP9	13.2729	-0.57451	1.37506	-0.417807	0.676088	NA
ARHGDIA	27457.2	-0.740539	0.134042	-5.52468	3.30087e-08	2.63971e-06
ARHGDIB	7.30544	2.26818	1.51665	1.49552	0.134779	NA
ARHGDIG	225.251	-0.146954	0.2652	-0.554126	0.579492	0.75703
ARHGEF1	1696.04	0.00245755	0.0923885	0.0266002	0.978779	0.988624
ARHGEF10	1122.86	0.0320085	0.115951	0.276052	0.782508	0.889199
ARHGEF10L	222.23	0.123989	0.233333	0.53138	0.595155	0.768471
ARHGEF11	1899.07	0.0401065	0.11039	0.363318	0.716367	0.846828
ARHGEF12	3160.96	0.428228	0.127155	3.36776	0.000757808	0.00769622
ARHGEF15	2.14584	-1.09454	6.63456	-0.164975	0.868964	NA
ARHGEF16	160.57	-0.689191	0.289579	-2.37998	0.0173136	0.0770743
ARHGEF17	477.023	-0.279713	0.169972	-1.64565	0.0998361	0.257148
ARHGEF18	1739.22	-0.134398	0.101558	-1.32336	0.185717	0.382986
ARHGEF19	65.9951	-0.252923	0.385213	-0.656581	0.51145	0.709359
ARHGEF2	1808.15	-0.0262991	0.102923	-0.255521	0.798321	0.898725
ARHGEF25	1018.72	-0.294151	0.175376	-1.67726	0.0934923	0.246869
ARHGEF26	961.443	0.11961	0.118483	1.00951	0.312728	0.528869
ARHGEF26-AS1	15.3821	0.637561	0.881715	0.723092	0.469623	NA
ARHGEF28	83.8188	0.0863598	0.475959	0.181444	0.856019	0.929156
ARHGEF3	377.129	-0.285042	0.259897	-1.09675	0.27275	0.488608
ARHGEF33	7.47068	-1.60281	1.45401	-1.10233	0.270317	NA
ARHGEF35	1.20087	1.2713	3.11937	0.40755	0.683604	NA
ARHGEF37	17.6504	-1.71349	0.954821	-1.79457	0.0727227	NA
ARHGEF38	35.1306	-0.660197	0.504978	-1.30738	0.191084	NA
ARHGEF39	2626.11	-0.314205	0.085821	-3.66117	0.000251065	0.00341791
ARHGEF4	391.78	0.0270436	0.177287	0.152541	0.87876	0.940656
ARHGEF40	413.687	-0.441099	0.155987	-2.82779	0.00468708	0.0301813
ARHGEF5	24.5452	-0.766045	0.643221	-1.19095	0.233672	NA
ARHGEF6	235.795	0.48358	0.229926	2.1032	0.0354485	0.127365
ARHGEF7	891.615	-0.0635701	0.147033	-0.432351	0.665486	0.81664
ARHGEF7-AS2	0.331873	-1.99213	6.63803	-0.300109	0.764094	NA
ARHGEF9	495.019	0.195745	0.195304	1.00226	0.31622	0.532617
ARID1A	6394.7	-0.125943	0.0986519	-1.27664	0.20173	0.404311
ARID1B	4904.18	-0.0893334	0.0940699	-0.949649	0.342291	0.560532
ARID2	2536.9	0.0376719	0.106225	0.354641	0.722859	0.851104
ARID3A	686.76	-0.280943	0.14927	-1.88212	0.0598203	0.181733
ARID3B	1342.52	-0.125524	0.144217	-0.87038	0.384093	0.60044
ARID3C	22.5495	-0.588263	0.465239	-1.26443	0.206075	NA
ARID4A	792.488	0.247602	0.160315	1.54448	0.122473	0.294384
ARID4B	1780.52	0.296418	0.142202	2.08449	0.0371156	0.131572
ARID5A	807.745	-0.380423	0.142978	-2.66072	0.00779745	0.0434802
ARID5B	391.719	-0.474347	0.231251	-2.05122	0.0402456	0.138457
ARIH1	1421.76	0.471797	0.0904312	5.21719	1.81659e-07	1.09282e-05
ARIH2	3600.98	0.335259	0.0710258	4.72024	2.35564e-06	9.0401e-05
ARIH2OS	254.708	0.419068	0.183729	2.28091	0.0225538	0.0919151
ARL1	1718.52	0.183235	0.147118	1.2455	0.212948	0.41769
ARL10	187.653	0.384539	0.218347	1.76114	0.0782149	0.21877
ARL13B	1071.55	0.124697	0.153629	0.811676	0.416978	0.631218
ARL14	0.465043	0	6.66256	0	1	NA
ARL14EP	353.72	0.315528	0.202405	1.55889	0.119022	0.28927
ARL15	239.914	0.155515	0.213307	0.729068	0.46596	0.671249
ARL16	1185.51	0.128816	0.112983	1.14013	0.254232	0.467668
ARL17A	519.207	0.0564229	0.151398	0.372679	0.709387	0.842571
ARL17B	443.697	-0.023067	0.175802	-0.13121	0.89561	0.95018
ARL2	2937.72	-0.148539	0.107044	-1.38765	0.165244	0.355196
ARL2-SNX15	2673.3	-0.156745	0.108307	-1.44723	0.147833	0.331038
ARL2BP	1562.78	0.0832838	0.121752	0.684047	0.493946	0.695408
ARL3	945.923	0.171051	0.152598	1.12093	0.262318	0.477088
ARL4A	81.7074	-0.172861	0.430306	-0.401716	0.687893	0.828686
ARL4C	211	0.447977	0.197149	2.27228	0.0230697	0.0933769
ARL4D	106.763	0.0121995	0.25556	0.0477361	0.961927	0.980664
ARL5A	734.935	0.338468	0.2151	1.57354	0.115595	0.284147
ARL5B	432.074	0.585691	0.199861	2.93049	0.00338432	0.0237757
ARL5C	0.358086	0.799438	6.66256	0.11999	0.904491	NA
ARL6	515.877	0.232364	0.16065	1.4464	0.148065	0.331447
ARL6IP1	3076.3	0.127279	0.089477	1.42247	0.154889	0.339829
ARL6IP4	4333.27	-0.0631176	0.123015	-0.513087	0.60789	0.777026
ARL6IP5	782.851	0.0150615	0.134121	0.112298	0.910587	0.957175
ARL6IP6	1341.53	0.0454887	0.11441	0.397594	0.690929	0.830695
ARL8A	779.391	-0.500651	0.177043	-2.82785	0.00468618	0.0301813
ARL8B	388.958	0.270417	0.139796	1.93437	0.0530672	0.16709
ARL9	3.14688	-0.0393941	2.14272	-0.0183851	0.985332	NA
ARMC1	468.626	0.364156	0.173889	2.09419	0.0362429	0.129418
ARMC10	548.136	0.136543	0.161966	0.843036	0.399208	0.61499
ARMC12	2.02282	-0.620306	2.49819	-0.248302	0.803901	NA
ARMC2	99.27	0.23598	0.370713	0.636558	0.524413	0.718385
ARMC3	13.4732	2.99961	1.08121	2.77431	0.00553197	NA
ARMC4	225.337	-0.032729	0.222527	-0.147079	0.883069	0.942539
ARMC4P1	9.91116	0.204171	0.896624	0.227711	0.819871	NA
ARMC5	1452.48	-0.433895	0.140539	-3.08736	0.00201945	0.0158869
ARMC6	5199.63	0.0605267	0.0724754	0.835135	0.403642	0.618788
ARMC7	656.723	-0.0876765	0.13757	-0.637323	0.523914	0.717849
ARMC8	1038.95	0.344477	0.118753	2.90078	0.00372237	0.0254282
ARMC9	895.175	0.00664306	0.120502	0.055128	0.956036	0.978196
ARMCX1	0.468603	-0.143244	6.61235	-0.0216632	0.982717	NA
ARMCX2	116.245	-0.145454	0.329769	-0.441077	0.659157	0.812669
ARMCX3	440.563	0.881188	0.174951	5.03676	4.7347e-07	2.31619e-05
ARMCX4	81.0104	0.638032	0.31563	2.02146	0.0432324	0.145067
ARMCX5	897.752	0.238148	0.128841	1.84839	0.0645463	0.191457
ARMCX5-GPRASP2	160.998	0.388253	0.187058	2.07557	0.0379336	0.133268
ARMCX6	782.598	0.0702734	0.182997	0.384014	0.700968	0.837076
ARMS2	0.382433	2.2713	6.61063	0.343583	0.73116	NA
ARMT1	1244.16	0.161544	0.101889	1.5855	0.112853	0.279673
ARNT	2759.5	-0.253613	0.114224	-2.22031	0.0263981	0.103342
ARNT2	306.859	-0.0615885	0.197745	-0.311453	0.755456	0.871729
ARNTL	322.24	0.140643	0.142672	0.985778	0.324242	0.541797
ARNTL2	366.591	0.251803	0.178758	1.40863	0.158946	0.345551
ARNTL2-AS1	8.00542	0.768144	0.925705	0.829794	0.406655	NA
ARPC1A	4250.43	0.0726012	0.0924408	0.78538	0.432231	0.644893
ARPC1B	885.196	-0.271069	0.147401	-1.83899	0.0659171	0.193904
ARPC2	7286.34	0.0945909	0.0727207	1.30074	0.193346	0.39326
ARPC3	3335.9	-0.125515	0.093277	-1.34562	0.178426	0.373199
ARPC4	948.281	0.529891	0.185503	2.8565	0.00428334	0.0281932
ARPC4-TTLL3	116.803	-1.89862	3.87851	-0.489523	0.624471	0.789307
ARPC5	2577.97	-0.0537393	0.155992	-0.3445	0.730471	0.855832
ARPC5L	991.466	0.140379	0.148403	0.945934	0.344183	0.562408
ARPIN	251.168	0.266346	0.207525	1.28344	0.199339	0.401655
ARPP19	449.248	0.2417	0.202115	1.19585	0.231754	0.441851
ARR3	7.20732	-2.2184	1.25405	-1.76898	0.0768964	NA
ARRB1	281.53	-0.0326498	0.158373	-0.206158	0.836667	0.919716
ARRB2	6573.14	-0.519086	0.117269	-4.42644	9.58004e-06	0.000274553
ARRDC1	923.535	-0.393274	0.124072	-3.16973	0.00152582	0.0129298
ARRDC1-AS1	1145.59	-0.236919	0.140767	-1.68306	0.0923631	0.245133
ARRDC2	208.972	-0.490401	0.242276	-2.02414	0.042956	0.144525
ARRDC3	430.997	0.485312	0.206185	2.35377	0.0185841	0.080701
ARRDC3-AS1	20.4967	0.226076	0.770243	0.293513	0.76913	NA
ARRDC4	519.804	0.156799	0.204033	0.768497	0.442192	0.652606
ARRDC5	14.6717	-0.831749	0.676066	-1.23028	0.218593	NA
ARSA	535.644	-0.273701	0.156064	-1.75377	0.0794697	0.221108
ARSB	413.477	-0.107094	0.185006	-0.578869	0.562678	0.744975
ARSE	5.72024	-1.25241	1.6563	-0.756152	0.449558	NA
ARSG	179.311	0.240819	0.239513	1.00545	0.31468	0.530664
ARSI	1.92902	3.31221	6.20689	0.533634	0.593595	NA
ARSJ	84.131	-0.439767	0.308474	-1.42562	0.153977	0.338887
ARSK	246.487	0.269587	0.266764	1.01058	0.312216	0.528538
ART1	2.67205	-4.03981	2.73166	-1.47889	0.13917	NA
ART5	248.719	-0.283283	0.244288	-1.15963	0.2462	0.458962
ARTN	2.85133	1.42987	2.18807	0.653484	0.513444	NA
ARV1	2843.99	0.104645	0.0867911	1.20571	0.22793	0.437482
ARVCF	454.071	0.280096	0.157747	1.77561	0.0757979	0.213877
ARX	2.06055	-1.52988	3.29861	-0.463796	0.642794	NA
ASAH1	1043.13	0.084368	0.1113	0.758022	0.448438	0.658169
ASAH2	118.179	0.331993	0.317719	1.04493	0.296057	0.513253
ASAH2B	385.068	0.12061	0.199004	0.606068	0.544469	0.731504
ASAP1	3291.22	-0.13426	0.119329	-1.12513	0.260536	0.475141
ASAP1-IT2	0.756702	1.68702	4.77252	0.353486	0.723724	NA
ASAP2	543.28	-0.239312	0.187142	-1.27877	0.200978	0.403073
ASAP3	310.16	-0.0156413	0.197378	-0.0792454	0.936837	0.968928
ASB1	558.514	0.0609891	0.143072	0.426282	0.669903	0.81912
ASB10	0.516335	0.799487	4.82476	0.165705	0.868389	NA
ASB12	19.2105	-1.64901	0.836809	-1.9706	0.0487699	NA
ASB13	1759.25	-0.098719	0.0805476	-1.2256	0.22035	0.427604
ASB14	4.67951	-0.531021	1.27064	-0.417916	0.676009	NA
ASB16	2.21107	-0.91283	2.17503	-0.419687	0.674714	NA
ASB16-AS1	299.524	-0.296691	0.277431	-1.06942	0.28488	0.501658
ASB18	5.3037	-1.01877	1.23996	-0.821616	0.411295	NA
ASB2	1.60991	-0.62884	3.16842	-0.198472	0.842676	NA
ASB5	2.74187	-1.344	2.93472	-0.457966	0.646977	NA
ASB6	1933.77	-0.361201	0.116575	-3.09846	0.00194532	0.0154458
ASB7	186.196	0.463727	0.239462	1.93654	0.0528017	0.166706
ASB8	570.964	0.15604	0.129124	1.20845	0.226872	0.435954
ASCC1	1368.67	-0.0288238	0.121358	-0.237511	0.81226	0.905967
ASCC2	4662.75	-0.122325	0.0617865	-1.9798	0.0477264	0.155508
ASCC3	4100.75	0.295107	0.114812	2.57034	0.01016	0.0528993
ASCL2	0.380685	1.68654	6.63697	0.254113	0.799408	NA
ASCL5	2.69435	5.30003	3.02376	1.75279	0.0796372	NA
ASF1A	933.65	0.185711	0.130673	1.42118	0.155264	0.340485
ASF1B	766.113	0.0389434	0.15035	0.259019	0.795621	0.897176
ASGR1	12.4551	-0.740041	1.03049	-0.718144	0.472668	NA
ASH1L	3825.89	0.102199	0.144581	0.706863	0.479652	0.682988
ASH1L-AS1	149.053	-0.550552	0.265473	-2.07385	0.0380929	0.133595
ASH2L	1960.04	0.13222	0.0832935	1.5874	0.112423	0.278931
ASIC1	1753.68	-0.300022	0.127115	-2.36025	0.0182627	0.0796794
ASIC2	0.368638	-2.99114	6.59802	-0.45334	0.650304	NA
ASIC3	136.886	-0.619218	0.33348	-1.85684	0.0633339	0.189095
ASIC4	2.94492	2.8762	2.37612	1.21046	0.226102	NA
ASIP	0.904168	2.6833	4.45581	0.602202	0.54704	NA
ASL	606.056	0.150319	0.143313	1.04889	0.294231	0.511914
ASMTL	993.663	0.064363	0.142819	0.450661	0.652234	0.807985
ASNA1	4446.53	-0.222897	0.0827547	-2.69347	0.00707123	0.040548
ASNS	7776.94	0.384589	0.0719745	5.34342	9.12113e-08	6.27901e-06
ASNSD1	2700.74	0.182333	0.110761	1.64618	0.0997275	0.257017
ASPDH	6.51537	2.10353	1.12446	1.8707	0.0613864	NA
ASPG	4.39692	-2.411	1.82212	-1.32318	0.185774	NA
ASPH	1648.4	0.515417	0.116215	4.43502	9.20644e-06	0.000266707
ASPHD1	95.2263	-0.341627	0.348001	-0.981682	0.326256	0.5441
ASPHD2	189.854	-0.278144	0.29002	-0.959051	0.337533	0.555416
ASPM	7498.62	0.372902	0.109801	3.39618	0.000683336	0.00718579
ASPN	0.374791	-4.51629	6.57174	-0.68723	0.491938	NA
ASPRV1	20.8118	-0.0631486	0.692224	-0.0912257	0.927313	NA
ASPSCR1	1224.99	-0.34756	0.107997	-3.21823	0.00128985	0.011507
ASRGL1	985.98	0.114036	0.129872	0.878064	0.379909	0.596764
ASS1	1337.28	-0.0712139	0.10482	-0.679394	0.496888	0.697785
ASTE1	640.878	0.00030771	0.126646	0.00242968	0.998061	0.99851
ASTL	0.675447	4.1872	6.38685	0.655597	0.512083	NA
ASTN1	40.3141	-0.294014	0.539864	-0.544608	0.586023	0.761629
ASTN2	136.241	0.166997	0.317671	0.525691	0.599103	0.771926
ASUN	4063.07	-0.00814317	0.068472	-0.118927	0.905333	0.954129
ASXL1	3644.35	0.182426	0.0790392	2.30804	0.0209968	0.0874646
ASXL2	1895.55	0.191623	0.140073	1.36802	0.171306	0.363718
ASXL3	188.872	-0.227793	0.306716	-0.742683	0.457673	0.664422
ATAD1	2886.55	0.344606	0.105943	3.25274	0.00114297	0.0105086
ATAD2	5118.01	0.29438	0.0871742	3.37692	0.000733034	0.00751664
ATAD2B	1080.52	0.485158	0.179175	2.70773	0.00677449	0.0391829
ATAD3A	5633.17	0.091507	0.0849923	1.07665	0.281637	0.49818
ATAD3B	3826.42	0.105052	0.102039	1.02953	0.30323	0.520311
ATAD3C	284.566	0.266261	0.2272	1.17192	0.241228	0.453515
ATAD5	1278.62	0.0995678	0.120742	0.824634	0.409579	0.624223
ATAT1	548.562	-0.268022	0.187578	-1.42885	0.153046	0.337719
ATE1	1454.23	0.253655	0.0993735	2.55254	0.0106942	0.0548865
ATE1-AS1	10.7312	-0.043428	0.898718	-0.0483222	0.961459	NA
ATF1	1569.93	0.0585924	0.119691	0.489529	0.624467	0.789307
ATF2	1989.49	0.260582	0.0904663	2.88043	0.0039713	0.0265542
ATF3	2605.24	-0.102928	0.15633	-0.658401	0.51028	0.708472
ATF4	28565.1	0.150329	0.0769796	1.95284	0.050839	0.162352
ATF5	484.678	-1.1393	0.171426	-6.64603	3.01098e-11	6.38281e-09
ATF6	3990.48	0.224146	0.0944138	2.37408	0.0175925	0.0776263
ATF6B	4583.95	-0.287163	0.151548	-1.89487	0.0581101	0.177792
ATF7	814.276	-0.0843685	0.161323	-0.52298	0.600988	0.772883
ATF7IP	3368.63	-0.00818525	0.114233	-0.0716541	0.942877	0.971765
ATF7IP2	186.426	0.382304	0.25037	1.52696	0.126772	0.30112
ATG10	78.2107	0.310812	0.379002	0.820082	0.412169	0.626653
ATG101	559.975	0.279444	0.134215	2.08206	0.0373367	0.132088
ATG12	1471.15	0.01732	0.137688	0.125791	0.899897	0.952569
ATG13	2915.73	0.104436	0.0922619	1.13195	0.257654	0.471431
ATG14	321.633	0.553784	0.201468	2.74874	0.0059825	0.0357798
ATG16L1	913.867	0.18478	0.133495	1.38417	0.166307	0.356854
ATG16L2	325.734	0.00246385	0.194869	0.0126436	0.989912	0.99417
ATG2A	3453.2	-0.227854	0.0919832	-2.47713	0.0132445	0.0634603
ATG2B	1684.26	0.319658	0.145058	2.20366	0.0275483	0.106456
ATG3	1807.86	0.0712078	0.100163	0.710921	0.477133	0.680632
ATG4A	960.985	-0.0136188	0.112035	-0.121558	0.903249	0.953637
ATG4B	2355.09	-0.0118079	0.096159	-0.122796	0.902269	0.953156
ATG4C	1243.61	-0.0226267	0.113348	-0.19962	0.841777	0.92197
ATG4D	1784.33	-0.252101	0.0854662	-2.94972	0.00318066	0.0226427
ATG5	1546.01	0.205424	0.101304	2.02781	0.0425799	0.143636
ATG7	1037.37	0.112603	0.107456	1.0479	0.294683	0.512234
ATG9A	6760.81	-0.145154	0.0976808	-1.486	0.137279	0.316152
ATG9B	15.3646	-1.31312	0.87697	-1.49733	0.134307	NA
ATHL1	371.931	-0.283897	0.228321	-1.24341	0.213715	0.418868
ATIC	10838.8	0.109727	0.0702304	1.56239	0.118197	0.288012
ATL1	182.73	-0.0576123	0.25938	-0.222115	0.824224	0.913183
ATL2	1969.33	0.131377	0.096469	1.36186	0.173242	0.366084
ATL3	535.679	0.231523	0.16418	1.41018	0.158488	0.345137
ATM	1002.94	0.543914	0.289093	1.88145	0.0599103	0.181924
ATMIN	2886.13	0.0720556	0.0784056	0.919011	0.35809	0.575486
ATN1	12242.4	-0.79997	0.175651	-4.55431	5.25585e-06	0.000172039
ATOH1	12.0875	-1.54965	1.28213	-1.20865	0.226797	NA
ATOH7	6.02604	0.0906267	1.28609	0.070467	0.943822	NA
ATOH8	28.1119	-0.729323	0.564768	-1.29137	0.196576	NA
ATOX1	493.133	-0.0884982	0.153919	-0.574965	0.565315	0.74669
ATP10D	555.588	0.268637	0.225267	1.19253	0.233054	0.443367
ATP11A	578.44	0.354203	0.199166	1.77843	0.0753327	0.21315
ATP11A-AS1	0.326515	-1.14227	6.57217	-0.173803	0.86202	NA
ATP11B	2179.4	0.122834	0.115379	1.06461	0.287053	0.503361
ATP11C	3428.98	0.263882	0.0860339	3.06719	0.00216082	0.016768
ATP12A	14.7736	-0.589404	1.10567	-0.533073	0.593983	NA
ATP13A1	6323.14	-0.0876336	0.0965337	-0.907803	0.363983	0.581875
ATP13A2	5598.26	-0.145189	0.101653	-1.42828	0.153211	0.337925
ATP13A3	1527.68	0.2508	0.175822	1.42644	0.15374	0.338596
ATP13A4	0.709749	1.68676	5.38409	0.313286	0.754063	NA
ATP13A5	1.20453	-0.42474	3.21417	-0.132146	0.894869	NA
ATP13A5-AS1	3.5867	-0.850165	2.16008	-0.39358	0.693891	NA
ATP1A1	42330.6	0.110195	0.0634933	1.73553	0.0826469	0.226945
ATP1A1-AS1	2066.57	0.40244	0.26454	1.52128	0.128189	0.302948
ATP1A2	1.09009	0.854396	2.43222	0.351282	0.725377	NA
ATP1A3	1379.73	-0.214735	0.103258	-2.0796	0.0375627	0.132606
ATP1A4	0.76961	0.799465	5.12227	0.156076	0.875973	NA
ATP1B1	552.21	0.0848819	0.161413	0.525866	0.598981	0.771844
ATP1B2	79.0586	-0.963183	0.463126	-2.07974	0.0375491	0.132593
ATP1B3	2594.72	0.346004	0.109867	3.14929	0.0016367	0.0135681
ATP1B4	0.925989	-1.12387	6.66256	-0.168684	0.866045	NA
ATP23	255.579	-0.0754301	0.250563	-0.301042	0.763383	0.876452
ATP2A1	119.612	-0.475725	0.246862	-1.92709	0.0539684	0.16919
ATP2A1-AS1	733.601	-0.551724	0.140268	-3.93335	8.377e-05	0.00144541
ATP2A2	15145.1	0.519198	0.0776728	6.68442	2.31843e-11	5.07584e-09
ATP2A3	111.361	-0.181927	0.378766	-0.480315	0.631004	0.793996
ATP2B1	4279.12	0.222769	0.0831061	2.68054	0.00735044	0.0417369
ATP2B2	0.666702	0.0985404	5.23326	0.0188296	0.984977	NA
ATP2B3	17.6185	-1.12588	1.02967	-1.09343	0.274204	NA
ATP2B4	697.922	0.290565	0.137218	2.11754	0.0342142	0.124135
ATP2C1	2089.18	0.614285	0.0989289	6.20936	5.32015e-10	7.47901e-08
ATP2C2	1.00631	1.18173	3.00341	0.393464	0.693977	NA
ATP4A	3.77738	-0.0317722	1.73038	-0.0183615	0.98535	NA
ATP5A1	17384.9	0.133229	0.0658267	2.02393	0.0429769	0.144537
ATP5B	50464	-0.0509921	0.0532426	-0.957733	0.338198	0.556433
ATP5C1	11796.1	-0.0598439	0.082347	-0.726728	0.467393	0.672488
ATP5D	4314.04	-0.362784	0.0989341	-3.66692	0.000245486	0.00336597
ATP5E	3280.41	-0.0656198	0.126416	-0.519078	0.603707	0.774705
ATP5F1	10161.8	0.118985	0.0844078	1.40965	0.158643	0.345231
ATP5G1	4445.32	-0.0832191	0.102412	-0.812592	0.416452	0.630767
ATP5G2	22128.2	-0.286197	0.101894	-2.80877	0.00497308	0.0314616
ATP5G3	9280.13	-0.0390581	0.087477	-0.446496	0.655239	0.810552
ATP5H	3678.69	-0.111182	0.082774	-1.3432	0.179207	0.374071
ATP5I	3368.62	0.213211	0.169849	1.25529	0.209372	0.412779
ATP5J	9589.08	-0.265723	0.124898	-2.12753	0.0333762	0.121919
ATP5J2	9925.04	-0.52525	0.109909	-4.77895	1.76214e-06	7.153e-05
ATP5J2-PTCD1	3592.52	-0.0609574	0.1126	-0.54136	0.588259	0.763405
ATP5L	11345.6	-0.414645	0.100179	-4.13904	3.48763e-05	0.000752461
ATP5L2	35.3925	-0.114094	0.376053	-0.3034	0.761585	NA
ATP5O	8595.08	-0.122714	0.0771434	-1.59073	0.111671	0.277774
ATP5S	256.969	-0.0632288	0.185772	-0.340356	0.733588	0.857587
ATP5SL	2931.82	-0.372256	0.110977	-3.35434	0.000795543	0.0079862
ATP6	321897	-0.307707	0.133348	-2.30754	0.0210247	0.0875538
ATP6AP1	9043.92	-0.0734498	0.0714591	-1.02786	0.304017	0.5212
ATP6AP1L	59.0666	0.810676	0.480996	1.68541	0.0919097	0.244285
ATP6AP2	2839.76	-0.100421	0.0867181	-1.15802	0.246855	0.45967
ATP6V0A1	7888.36	0.0223952	0.104056	0.215222	0.829594	0.916623
ATP6V0A2	1884.96	0.448596	0.110018	4.07748	4.55261e-05	0.000903419
ATP6V0A4	0.616881	-0.143236	5.43675	-0.0263459	0.978981	NA
ATP6V0B	3367.18	0.129601	0.105387	1.22976	0.218787	0.425808
ATP6V0C	10029.5	-0.428785	0.148374	-2.88989	0.00385375	0.0259933
ATP6V0D1	3425.08	0.00673702	0.107448	0.0627004	0.950005	0.975422
ATP6V0D2	2.98866	0.846573	2.76068	0.306654	0.759107	NA
ATP6V0E1	1235.63	-0.170246	0.13058	-1.30377	0.192313	0.391994
ATP6V0E2	8539.68	-0.502856	0.114025	-4.41006	1.0334e-05	0.000292396
ATP6V0E2-AS1	236.874	-0.26662	0.276552	-0.964085	0.335003	0.552666
ATP6V1A	1388.89	0.485611	0.122924	3.95049	7.79926e-05	0.00136334
ATP6V1B1	52.8199	1.07197	0.519156	2.06483	0.0389392	0.135496
ATP6V1B1-AS1	118.738	-0.430591	0.341844	-1.25961	0.207809	0.410865
ATP6V1B2	3699.16	0.174598	0.0739325	2.36159	0.0181969	0.0794959
ATP6V1C1	1338.89	0.05183	0.163992	0.316051	0.751964	0.869328
ATP6V1C2	2335.2	0.476291	0.114171	4.17174	3.02288e-05	0.000675417
ATP6V1D	1247.79	0.0780053	0.150166	0.519459	0.603441	0.774452
ATP6V1E1	1896.07	0.131154	0.102387	1.28096	0.200207	0.402314
ATP6V1E2	25.1848	0.750742	0.68576	1.09476	0.273622	NA
ATP6V1F	7314.67	-0.601074	0.107988	-5.5661	2.60501e-08	2.18804e-06
ATP6V1G1	4377.12	0.166017	0.0950288	1.74701	0.080635	0.223141
ATP6V1G2	16.5889	-1.11404	0.803864	-1.38585	0.165792	NA
ATP6V1G2-DDX39B	4167.16	-0.670096	0.736991	-0.909233	0.363227	0.581285
ATP6V1H	825.889	0.237639	0.213034	1.1155	0.264637	0.479763
ATP7A	649.897	0.11084	0.202618	0.54704	0.584351	0.760403
ATP7B	1499.52	0.284415	0.0871431	3.26377	0.00109942	0.0102187
ATP8	78163	-0.125428	0.273509	-0.45859	0.646529	0.803798
ATP8A1	608.254	0.210591	0.182316	1.15509	0.248054	0.46113
ATP8A2	15.2599	0.319918	0.755773	0.4233	0.672077	NA
ATP8B1	27.1985	-0.602764	0.626477	-0.962148	0.335975	NA
ATP8B2	3892.71	0.045149	0.0707135	0.638478	0.523163	0.717335
ATP8B3	14.7765	0.348453	0.795699	0.437921	0.661443	NA
ATP8B4	2.33335	0.760389	2.55326	0.297811	0.765848	NA
ATP9A	558.567	0.00887889	0.179063	0.0495852	0.960453	0.980226
ATP9B	373.429	0.0556133	0.196276	0.283342	0.776915	0.885147
ATPAF1	2743.53	0.176052	0.095589	1.84176	0.0655108	0.193049
ATPAF2	979.031	0.0483652	0.129822	0.372551	0.709483	0.842571
ATPIF1	7294.17	-0.140384	0.10626	-1.32114	0.186455	0.383861
ATR	2134.85	0.437588	0.120933	3.61844	0.000296379	0.00387645
ATRAID	2988.62	-0.237091	0.107739	-2.20061	0.0277634	0.107071
ATRIP	1593.11	-0.0781332	0.118641	-0.658571	0.510171	0.708472
ATRN	1543.79	0.408029	0.108018	3.7774	0.000158475	0.00235159
ATRNL1	174.553	0.0282875	0.285885	0.0989473	0.92118	0.961809
ATRX	2390.46	0.268961	0.157509	1.70759	0.0877131	0.236687
ATXN1	247.581	-0.591068	0.265253	-2.22831	0.0258596	0.101814
ATXN10	4597.82	0.172701	0.0778302	2.21895	0.0264901	0.103534
ATXN1L	863.618	-0.117996	0.209272	-0.563844	0.57286	0.752411
ATXN2	5786.87	-0.403394	0.145767	-2.76739	0.00565079	0.0343355
ATXN2L	16639.2	-0.573134	0.181547	-3.15694	0.00159435	0.0133496
ATXN3	501.521	0.276057	0.145624	1.89568	0.0580023	0.177565
ATXN3L	0.690187	2.72647	4.45461	0.612056	0.540501	NA
ATXN7	911.566	-0.085638	0.141675	-0.604469	0.545532	0.732176
ATXN7L1	354.596	-0.357038	0.219066	-1.62982	0.10314	0.262483
ATXN7L2	1200.29	-0.21741	0.144535	-1.50421	0.132528	0.309102
ATXN7L3	800.839	0.151818	0.122387	1.24048	0.214798	0.420057
ATXN7L3B	296.335	0.296054	0.170985	1.73146	0.083369	0.228424
AUH	465.872	0.447945	0.161778	2.76889	0.00562478	0.0342383
AUNIP	974.341	0.0494122	0.152558	0.323891	0.74602	0.865905
AUP1	9613.95	-0.0846341	0.105784	-0.800065	0.423673	0.636535
AURKA	3546.41	0.0144379	0.0890196	0.162188	0.871158	0.936439
AURKAIP1	5325.84	-0.199142	0.095422	-2.08696	0.0368916	0.131034
AURKB	6759.18	-0.235021	0.0660479	-3.55834	0.000373208	0.00456846
AURKC	21.5931	0.265442	0.785118	0.338091	0.735294	NA
AUTS2	3162.31	-0.611852	0.154574	-3.9583	7.54836e-05	0.00132993
AVEN	406.882	0.0129953	0.173031	0.0751043	0.940132	0.970234
AVIL	17.4994	0.693445	0.755846	0.917442	0.358911	NA
AVL9	610.717	0.311231	0.143997	2.16137	0.0306669	0.114561
AVPI1	178.666	-0.0575904	0.231331	-0.248952	0.803398	0.901371
AVPR1A	1.24145	1.20197	3.53601	0.339922	0.733915	NA
AVPR2	0.680342	1.29644	4.92026	0.263491	0.792172	NA
AWAT1	0.620404	4.14301	5.9075	0.701314	0.483107	NA
AXDND1	5.78374	-1.08488	1.59465	-0.680323	0.4963	NA
AXIN1	4033.77	-0.233367	0.0879336	-2.6539	0.00795668	0.0440554
AXIN2	551.385	-0.423546	0.152526	-2.77688	0.0054883	0.0335913
AXL	3.52974	-2.07566	1.76357	-1.17697	0.239208	NA
AZI2	1220.08	0.494393	0.100741	4.90755	9.22204e-07	4.14681e-05
AZIN1	1479.11	0.193921	0.115675	1.67644	0.0936523	0.24713
AZIN1-AS1	12.4263	-1.32304	0.901462	-1.46766	0.142196	NA
AZIN2	178.443	-0.312177	0.313462	-0.995899	0.319299	0.536113
AZU1	0.313391	2.30967	6.58418	0.350791	0.725745	NA
B2M	4685.52	0.0698443	0.103032	0.677891	0.497841	0.698571
B3GALNT1	120.144	0.0151061	0.267641	0.0564417	0.95499	0.97778
B3GALNT2	2154.64	0.11613	0.0971247	1.19568	0.231823	0.441851
B3GALT1	17.6315	-0.664058	0.784334	-0.846652	0.397189	NA
B3GALT4	3.8895	0.48437	1.52463	0.317696	0.750715	NA
B3GALT5	1.15253	-2.99338	3.62798	-0.82508	0.409326	NA
B3GALT5-AS1	2.96906	1.41519	2.03011	0.697101	0.48574	NA
B3GALT6	647.013	-0.404406	0.158437	-2.55247	0.0106962	0.0548865
B3GAT1	6.85058	-1.23038	1.1861	-1.03733	0.29958	NA
B3GAT2	65.9256	-0.0295351	0.376232	-0.0785023	0.937429	0.969141
B3GAT3	3462.21	-0.326078	0.12377	-2.63455	0.00842493	0.0461061
B3GLCT	435.61	0.212721	0.162116	1.31215	0.189468	0.388473
B3GNT2	279.407	0.117219	0.190039	0.616812	0.537359	0.727717
B3GNT3	7.13542	-1.32447	1.15374	-1.14798	0.250979	NA
B3GNT4	79.7118	-0.367665	0.356936	-1.03006	0.302982	0.520026
B3GNT5	157.067	0.516206	0.408712	1.263	0.206588	0.409262
B3GNT7	2.20842	3.32326	2.48876	1.33531	0.181775	NA
B3GNT8	19.9562	-0.944497	0.706647	-1.33659	0.181356	NA
B3GNT9	25.3087	0.183645	0.783885	0.234276	0.814771	NA
B3GNTL1	297.981	0.0888777	0.166074	0.535168	0.592534	0.766643
B4GALNT1	808.021	-0.194273	0.127325	-1.52581	0.127058	0.301339
B4GALNT3	938.524	-0.288904	0.131689	-2.19383	0.0282474	0.108306
B4GALNT4	266.389	-0.267885	0.209268	-1.28011	0.200507	0.402431
B4GALT1	539.357	-0.150523	0.171145	-0.879507	0.379127	0.59606
B4GALT1-AS1	5.22544	-0.853976	1.67785	-0.508971	0.610772	NA
B4GALT2	4899.28	-0.522441	0.124934	-4.18175	2.89273e-05	0.000655897
B4GALT3	3947.65	0.0476601	0.0995934	0.478546	0.632261	0.79479
B4GALT4	721.22	0.211503	0.127593	1.65764	0.0973903	0.253488
B4GALT4-AS1	21.884	0.39215	0.524346	0.747884	0.45453	NA
B4GALT5	738.238	0.336051	0.165343	2.03245	0.0421082	0.142549
B4GALT6	553.201	0.171109	0.166737	1.02623	0.304785	0.521849
B4GALT7	1168.58	-0.185124	0.123	-1.50507	0.132306	0.308907
B4GAT1	3308.37	-0.227632	0.0783613	-2.90491	0.0036736	0.025175
B9D1	906.341	-0.261208	0.120492	-2.16785	0.03017	0.113307
B9D2	64.3866	-0.416203	0.369001	-1.12792	0.259354	0.473598
BAALC	12.378	0.585773	1.23735	0.47341	0.63592	NA
BAALC-AS1	1.59944	0	3.17206	0	1	NA
BAALC-AS2	0.974469	-1.49021	3.65809	-0.407374	0.683733	NA
BAAT	5.8403	0.680916	1.38012	0.493376	0.621747	NA
BABAM1	3514.49	-0.135558	0.103114	-1.31464	0.18863	0.387205
BACE1	488.684	0.000990655	0.18949	0.00522801	0.995829	0.997472
BACE1-AS	53.6154	-0.20676	0.485113	-0.426211	0.669954	0.81912
BACE2	849.656	-0.103106	0.13616	-0.757242	0.448905	0.658299
BACH1	548.653	0.50867	0.148722	3.42029	0.000625556	0.00671567
BACH2	102.657	-0.137765	0.285992	-0.48171	0.630012	0.793701
BAD	1023.92	-0.299849	0.128957	-2.32517	0.0200626	0.0850592
BAG1	1190.25	0.0937378	0.126013	0.743875	0.456952	0.664089
BAG2	852.804	0.132701	0.163871	0.809788	0.418062	0.632373
BAG3	6400.47	0.17498	0.0992533	1.76296	0.0779067	0.218122
BAG4	1507.83	-0.0583415	0.13393	-0.435611	0.663119	0.814969
BAG5	585.126	0.433549	0.201568	2.15089	0.0314852	0.116834
BAG6	24648.7	-0.268154	0.0926762	-2.89345	0.00381029	0.0258631
BAGE2	2.27615	1.85182	2.59609	0.713311	0.475654	NA
BAHCC1	1288.1	-0.351662	0.147805	-2.37922	0.0173493	0.0772068
BAHD1	3030.26	-0.268371	0.0946595	-2.83511	0.00458094	0.0297125
BAIAP2	1834.13	-0.224754	0.0957541	-2.3472	0.0189151	0.0816984
BAIAP2-AS1	503.558	-0.104966	0.17237	-0.608958	0.542553	0.729848
BAIAP2L1	1647.87	-0.179269	0.122792	-1.45994	0.144308	0.326151
BAIAP2L2	15.5311	0.0802127	0.701123	0.114406	0.908916	NA
BAIAP3	56.1747	0.0605703	0.660352	0.0917244	0.926917	0.96402
BAK1	521.582	-0.0574602	0.127115	-0.452034	0.651245	0.807555
BAMBI	415.383	-0.0267749	0.175355	-0.15269	0.878643	0.940625
BANF1	1529.53	-0.362085	0.106942	-3.38581	0.000709678	0.00736995
BANP	995.213	0.143395	0.117024	1.22534	0.220447	0.427718
BAP1	6482.56	-0.0348501	0.0569089	-0.612383	0.540284	0.728912
BARD1	705.988	-0.0940182	0.160451	-0.585961	0.557902	0.741961
BARHL2	278.971	-0.826657	0.212907	-3.88272	0.000103293	0.00169054
BARX1	255.754	-0.216607	0.226744	-0.955297	0.339427	0.557261
BARX2	482.471	-0.351815	0.19155	-1.83667	0.0662589	0.194507
BASP1	655.788	-0.465984	0.173502	-2.68576	0.00723658	0.041213
BATF2	9.24004	-0.842853	1.0298	-0.818464	0.413092	NA
BATF3	169.931	-0.131936	0.265146	-0.497599	0.618766	0.785217
BAX	2531.89	-0.270368	0.0949409	-2.84776	0.00440287	0.0288378
BAZ1A	7162.72	-0.0619697	0.106663	-0.580986	0.56125	0.744053
BAZ1B	7878.76	0.182421	0.0921474	1.97966	0.0477413	0.155508
BAZ2A	9445.37	-0.103188	0.118875	-0.868036	0.385375	0.601315
BAZ2B	623.391	0.228143	0.182688	1.24881	0.211733	0.416205
BBC3	159.978	-0.522893	0.282469	-1.85115	0.0641478	0.190588
BBIP1	493.353	0.282567	0.207808	1.35975	0.173909	0.366971
BBOF1	64.0724	0.741298	0.436423	1.69857	0.0893993	0.239648
BBOX1	0.876911	0	4.69126	0	1	NA
BBOX1-AS1	71.3365	0.0868953	0.424926	0.204495	0.837967	0.919971
BBS1	750.434	-0.023196	0.134934	-0.171906	0.863511	0.932691
BBS10	467.747	-0.0286794	0.153467	-0.186877	0.851757	0.926629
BBS12	137.218	0.130951	0.30285	0.432395	0.665454	0.81664
BBS2	1211.27	0.266284	0.112911	2.35836	0.0183559	0.0800074
BBS4	1399.8	-0.0466697	0.10013	-0.466094	0.641149	0.800234
BBS5	142.207	-0.149441	0.343543	-0.434999	0.663563	0.815261
BBS7	1520.93	0.440471	0.147799	2.9802	0.0028806	0.0209648
BBS9	395.077	0.200037	0.189384	1.05625	0.290854	0.50801
BBX	1383.17	0.162193	0.13859	1.1703	0.241879	0.454203
BCAM	590.479	-0.737685	0.212691	-3.46834	0.000523692	0.0058234
BCAN	4.5017	1.43628	1.74147	0.824751	0.409513	NA
BCAP29	1512.12	0.0229847	0.0947065	0.242694	0.808242	0.90376
BCAP31	9892.86	-0.177863	0.119063	-1.49385	0.135214	0.31319
BCAR1	3601.73	-0.372152	0.144127	-2.58211	0.00981971	0.0515902
BCAR3	381.423	-0.2303	0.164037	-1.40395	0.160335	0.347809
BCAR4	0.376621	2.25742	6.61115	0.341456	0.73276	NA
BCAS1	3.1907	1.26958	1.61126	0.787943	0.43073	NA
BCAS2	3169.91	0.217235	0.113334	1.91677	0.0552677	0.172132
BCAS3	1958.66	-0.0548608	0.100267	-0.547148	0.584277	0.76038
BCAS4	247.701	-0.122279	0.200891	-0.608684	0.542734	0.729931
BCAT1	2168.05	0.214072	0.106877	2.00296	0.0451812	0.14951
BCAT2	2148.36	-0.330976	0.0753528	-4.39236	1.12129e-05	0.000309397
BCCIP	5439.36	0.135265	0.120741	1.12029	0.26259	0.477387
BCDIN3D	284.887	-0.23366	0.217708	-1.07327	0.28315	0.499863
BCDIN3D-AS1	60.3466	-0.236368	0.316742	-0.746247	0.455518	0.663335
BCHE	80.0553	0.248386	0.409082	0.607178	0.543733	0.730759
BCKDHA	2367.4	-0.35096	0.100199	-3.50262	0.000460708	0.00530868
BCKDHB	837.908	0.152292	0.149203	1.0207	0.307395	0.523765
BCKDK	4692.24	-0.213816	0.107629	-1.9866	0.0469668	0.154113
BCL10	274.964	-0.161812	0.249883	-0.647549	0.517277	0.712747
BCL11A	504.407	-0.126773	0.175371	-0.722881	0.469753	0.674591
BCL11B	8.78119	0.876165	1.06552	0.822285	0.410915	NA
BCL2	80.5355	0.176249	0.467083	0.377339	0.705922	0.840256
BCL2L1	1526.25	-0.526832	0.164613	-3.20043	0.00137224	0.0119936
BCL2L11	1066.96	0.0555991	0.122772	0.452867	0.650645	0.807036
BCL2L12	2224.41	-0.299798	0.107314	-2.79366	0.0052116	0.0324951
BCL2L13	2934.42	0.184235	0.0874296	2.10724	0.0350967	0.126305
BCL2L14	0.637064	0	6.66256	0	1	NA
BCL2L15	0.630625	-1.12402	5.55372	-0.20239	0.839612	NA
BCL2L2	90.5586	0.313397	0.267069	1.17347	0.240608	0.452581
BCL2L2-PABPN1	41.9862	0.26226	0.324538	0.808104	0.419031	0.633264
BCL3	67.75	-1.11737	0.308743	-3.61911	0.000295621	0.0038744
BCL6	404.499	-0.369197	0.195125	-1.8921	0.0584774	0.178672
BCL6B	718.442	-0.322052	0.148111	-2.1744	0.0296754	0.112045
BCL7A	378.443	0.154148	0.162348	0.949494	0.342369	0.560542
BCL7B	2684.69	-0.363906	0.105089	-3.46285	0.000534493	0.00591069
BCL7C	3378.65	-0.371549	0.10895	-3.41025	0.000649024	0.00690654
BCL9	3381.41	-0.320062	0.12643	-2.53154	0.0113564	0.0574902
BCL9L	807.417	-0.595269	0.167859	-3.54624	0.000390765	0.00472705
BCLAF1	18678.2	0.124156	0.0863169	1.43837	0.150328	0.334382
BCO1	1.38288	-2.59622	4.03411	-0.643567	0.519856	NA
BCO2	12.94	0.914144	1.05872	0.86344	0.387896	NA
BCOR	11141	-0.157505	0.0951323	-1.65564	0.0977942	0.253995
BCORL1	3204.04	-0.245804	0.137803	-1.78374	0.0744664	0.211506
BCR	5662.78	-0.00173325	0.0768478	-0.0225543	0.982006	0.990161
BCS1L	2881.87	-0.0668913	0.0956481	-0.699349	0.484334	0.687316
BCYRN1	59756.7	-2.11393	0.398986	-5.29826	1.16911e-07	7.57935e-06
BDH1	172.441	-0.198712	0.241816	-0.82175	0.411219	0.625471
BDH2	173.141	0.0322438	0.23934	0.13472	0.892833	0.948666
BDKRB2	2.21353	-0.717551	2.02993	-0.353486	0.723724	NA
BDNF	3.84309	-2.97045	1.7422	-1.705	0.0881945	NA
BDNF-AS	19.4338	0.604834	0.797312	0.758591	0.448097	NA
BDP1	2250.04	0.479782	0.180784	2.6539	0.00795665	0.0440554
BEAN1	9.40459	-1.63395	1.1635	-1.40433	0.160219	NA
BECN1	1544.64	0.310984	0.105342	2.95214	0.00315582	0.0225139
BEGAIN	38.4941	-1.2331	0.628441	-1.96215	0.0497446	0.160043
BEND2	0.442372	-3.57577	6.58461	-0.54305	0.587096	NA
BEND3	298.29	0.105889	0.182769	0.579359	0.562347	0.744758
BEND4	323.694	-0.00867216	0.278015	-0.0311932	0.975115	0.987247
BEND5	33.8534	-0.379449	0.565355	-0.671169	0.502113	NA
BEND6	148.531	0.521032	0.255614	2.03835	0.0415147	0.141256
BEND7	902.057	0.119602	0.13524	0.88437	0.376496	0.593638
BEST1	36.9176	0.361342	0.609669	0.592685	0.553392	0.73839
BEST2	2.04313	1.63814	2.73634	0.598662	0.549398	NA
BEST3	2.05603	-3.59625	2.95505	-1.21698	0.22361	NA
BEST4	3.23372	2.00043	1.69622	1.17935	0.238261	NA
BET1	475.349	0.402824	0.185161	2.17554	0.0295898	0.111947
BET1L	97.4402	0.518926	0.24524	2.11599	0.0343454	0.124372
BEX1	370.414	0.246357	0.194243	1.26829	0.204694	0.407208
BEX2	830.661	0.389895	0.235148	1.65808	0.0973005	0.253353
BEX3	4750.07	-0.0486586	0.0866324	-0.561667	0.574343	0.753694
BEX4	999.429	0.112513	0.111311	1.0108	0.312113	0.528432
BEX5	35.6802	0.186253	0.470977	0.395461	0.692503	NA
BFAR	2111.97	-0.140485	0.104102	-1.34949	0.177179	0.371347
BFSP1	163.624	-0.0124058	0.267618	-0.0463563	0.963026	0.980874
BGLAP	52.1432	-0.378021	0.502711	-0.751965	0.452072	0.660428
BGN	2.92758	2.26624	2.52555	0.897323	0.369546	NA
BHLHA15	14.6461	0.744475	1.08392	0.686835	0.492186	NA
BHLHB9	164.77	0.249599	0.267573	0.932826	0.35091	0.568523
BHLHE22	13.4892	-1.25339	0.969816	-1.2924	0.196219	NA
BHLHE23	3.70301	-0.598974	1.69562	-0.353249	0.723902	NA
BHLHE40	482.382	-1.01783	0.222549	-4.57353	4.79586e-06	0.000159722
BHLHE40-AS1	2.97257	-2.41457	1.96381	-1.22954	0.218871	NA
BHLHE41	81.2136	-0.485013	0.336642	-1.44074	0.149659	0.333394
BHMG1	36.1407	0.161466	0.63712	0.253431	0.799935	NA
BHMT	2.04609	3.65794	2.23954	1.63334	0.102398	NA
BICC1	541.549	-0.0175585	0.195483	-0.0898212	0.928429	0.964766
BICD1	499.316	-0.150259	0.161345	-0.931289	0.351704	0.569208
BICD2	1501.59	0.301559	0.0997437	3.02333	0.00250007	0.0186841
BICDL1	89.5488	-0.0184339	0.321675	-0.0573061	0.954301	0.977504
BICDL2	29.7308	-0.339599	0.743544	-0.45673	0.647865	NA
BID	903.453	-0.177132	0.121915	-1.45291	0.146247	0.32881
BIK	14.9227	-1.37203	1.01867	-1.34688	0.178019	NA
BIN1	1090.93	-0.422193	0.105134	-4.01576	5.9254e-05	0.00110368
BIN2	0.508141	-1.99269	5.77693	-0.344939	0.73014	NA
BIN3	600.965	0.151449	0.117529	1.28861	0.197534	0.399191
BIN3-IT1	0.983883	-3.58293	4.8151	-0.744102	0.456815	NA
BIRC2	769.401	0.363901	0.13114	2.7749	0.00552192	0.0337507
BIRC3	5.16544	-0.666979	1.38183	-0.48268	0.629323	NA
BIRC5	14769.5	-0.584912	0.109019	-5.36523	8.08451e-08	5.66083e-06
BIRC6	5283.88	0.373464	0.103751	3.59962	0.000318686	0.00409547
BIRC8	0.325656	-4.31421	6.57385	-0.656269	0.511651	NA
BISPR	2.41088	-1.13311	2.35006	-0.482165	0.629689	NA
BIVM	355.786	0.346156	0.18147	1.90751	0.056454	0.174524
BIVM-ERCC5	135.799	0.377042	0.353481	1.06666	0.286127	0.50302
BLACAT1	0.372902	0	6.66256	0	1	NA
BLCAP	236.318	-0.257492	0.250689	-1.02714	0.304357	0.521515
BLK	0.812338	0.799496	4.06722	0.196571	0.844163	NA
BLM	3746.88	0.293014	0.0652128	4.49321	7.01587e-06	0.000215395
BLMH	2464.64	0.185039	0.0999804	1.85075	0.0642049	0.190649
BLNK	2.03898	-1.76028	1.86283	-0.944947	0.344686	NA
BLOC1S1	872.665	-0.806015	0.45537	-1.77002	0.0767233	0.215892
BLOC1S1-RDH5	932.004	0.165409	0.515244	0.32103	0.748187	0.867056
BLOC1S2	686.406	0.167347	0.182378	0.917581	0.358838	0.576152
BLOC1S3	194.796	-0.109198	0.238549	-0.45776	0.647125	0.803963
BLOC1S4	352.37	-0.166945	0.234577	-0.711686	0.476659	0.680319
BLOC1S5-TXNDC5	12229.6	0.444782	0.0513109	8.66838	4.38329e-18	3.44346e-15
BLOC1S6	1373.42	0.21622	0.104295	2.07315	0.038158	0.133648
BLVRA	812.143	0.121718	0.135885	0.895743	0.37039	0.587756
BLVRB	829.18	-0.270031	0.181997	-1.48371	0.137885	0.31711
BLZF1	888.66	0.259261	0.114516	2.26396	0.0235763	0.0948377
BMF	14.8727	-1.8505	0.772171	-2.3965	0.0165527	NA
BMI1	2.9318	0	6.66256	0	NA	NA
BMP1	942.085	-0.186415	0.118717	-1.57025	0.116357	0.285023
BMP2	288.528	-0.421901	0.192664	-2.18983	0.0285369	0.109107
BMP2K	1120.44	-0.267483	0.145367	-1.84005	0.0657605	0.193656
BMP3	4.81789	-1.99844	1.58548	-1.26047	0.207501	NA
BMP4	369.581	-0.145312	0.159654	-0.910174	0.362731	0.580709
BMP5	4.74789	-0.605352	1.97028	-0.307241	0.75866	NA
BMP6	173.137	-0.107145	0.209887	-0.510487	0.60971	0.778484
BMP7	2577.85	-0.356142	0.0993848	-3.58347	0.000339061	0.00426782
BMP8A	79.075	0.297789	0.295577	1.00748	0.313703	0.529981
BMP8B	162.557	-0.258944	0.27297	-0.948616	0.342816	0.560985
BMPER	44.1737	0.742043	0.432873	1.71423	0.0864869	0.234334
BMPR1A	278.368	0.351053	0.23696	1.48149	0.138476	0.318092
BMPR1B	61.1622	0.278176	0.428683	0.648908	0.516398	0.712092
BMPR1B-AS1	1.59806	-0.175729	3.62839	-0.0484317	0.961372	NA
BMPR2	1111.91	0.080925	0.158889	0.509317	0.61053	0.77896
BMS1	8497.25	0.306211	0.0874386	3.50201	0.000461756	0.00531616
BMT2	165.478	0.264196	0.219178	1.2054	0.228051	0.437652
BMX	0.687359	4.16842	5.71483	0.729404	0.465754	NA
BNC1	77.4487	0.087145	0.348011	0.250409	0.802271	0.900894
BNC2	188.568	-0.134735	0.24481	-0.550365	0.582069	0.758467
BNIP1	571.629	0.148841	0.140371	1.06034	0.288988	0.505691
BNIP2	948.989	0.579263	0.172419	3.35963	0.000780473	0.00787847
BNIP3	1094.14	-0.143073	0.123162	-1.16167	0.245371	0.458055
BNIP3L	666.884	0.1575	0.146136	1.07776	0.28114	0.498093
BNIPL	17.9509	0.375096	0.812835	0.461466	0.644465	NA
BOC	515.713	-0.35339	0.181025	-1.95217	0.0509184	0.162566
BOD1	3707.69	0.220637	0.105397	2.0934	0.0363135	0.129601
BOD1L1	2028.79	0.300434	0.128838	2.33187	0.0197076	0.0839112
BOD1L2	27.933	0.107403	0.528188	0.203341	0.838868	NA
BOK	9.91319	-1.19549	0.91586	-1.30532	0.191784	NA
BOK-AS1	1.02383	-0.628709	4.01897	-0.156435	0.87569	NA
BOLA1	277.716	-0.0499409	0.254264	-0.196414	0.844287	0.922478
BOLA2	3829.35	-0.117717	0.135171	-0.87088	0.38382	0.600154
BOLA2-SMG1P6	2448.54	-0.150763	0.10161	-1.48374	0.137878	0.31711
BOLA2B	2398.74	-0.231853	0.112581	-2.05943	0.0394534	0.136644
BOLA3	2881.21	-0.220167	0.0862478	-2.55273	0.0106883	0.0548865
BOLA3-AS1	430.244	-0.0531636	0.223258	-0.238126	0.811783	0.905712
BOLL	0.440131	-3.85767	6.57984	-0.586286	0.557683	NA
BOP1	13125	-0.344089	0.0819707	-4.19771	2.69632e-05	0.000629534
BORA	1751.15	0.258697	0.101853	2.53991	0.0110882	0.0563481
BORCS5	168.296	-0.026575	0.278691	-0.0953563	0.924032	0.963014
BORCS6	290.757	-0.251019	0.214215	-1.17181	0.241275	0.453515
BORCS7-ASMT	465.77	-0.054052	0.191451	-0.282328	0.777692	0.885586
BORCS8	545.416	-0.214146	0.157178	-1.36244	0.173059	0.36587
BORCS8-MEF2B	308.083	-0.504701	0.183054	-2.75712	0.0058313	0.0351305
BPGM	409.722	0.39954	0.161867	2.46832	0.0135748	0.0644476
BPHL	668.531	-0.0577414	0.178969	-0.322634	0.746973	0.866483
BPIFA2	0.678529	0	6.66256	0	1	NA
BPIFB1	0.389415	0	6.66256	0	1	NA
BPIFC	0.4056	3.31257	6.58343	0.503168	0.614846	NA
BPNT1	1656.99	0.385187	0.123904	3.10874	0.00187884	0.0150612
BPTF	9895.62	-0.144367	0.098231	-1.46967	0.141652	0.322442
BRAF	1426.19	-0.151209	0.0962405	-1.57116	0.116146	0.28479
BRAP	1334.54	0.376655	0.1109	3.39635	0.000682906	0.00718579
BRAT1	4020.26	-0.113721	0.0774319	-1.46865	0.141927	0.322901
BRCA1	3853.3	0.186059	0.107095	1.73733	0.0823287	0.226374
BRCA2	1770	0.423491	0.115534	3.6655	0.000246853	0.00337779
BRCAT54	13.108	-2.06488	1.09097	-1.8927	0.0583979	NA
BRCC3	612.821	0.45471	0.175145	2.59619	0.00942644	0.0501554
BRD1	2211.04	0.12585	0.097879	1.28577	0.198524	0.400497
BRD2	40487.1	-0.184916	0.0953856	-1.93861	0.0525487	0.166064
BRD3	2321.64	-0.517315	0.12587	-4.10991	3.95818e-05	0.000816424
BRD4	5507.09	-0.585981	0.104896	-5.58632	2.31934e-08	2.01135e-06
BRD7	3512.91	-0.0240604	0.0946391	-0.254233	0.799315	0.899314
BRD8	4335.76	-0.20734	0.104418	-1.98568	0.0470694	0.154336
BRD9	1087.71	0.0747965	0.117808	0.634902	0.525492	0.718831
BRE	2562.7	-0.04643	0.11766	-0.394613	0.693129	0.832414
BRE-AS1	70.6968	-0.0128784	0.35375	-0.0364053	0.970959	0.98498
BREA2	4.72262	0.712545	1.30765	0.544905	0.585819	NA
BRF1	1317.93	0.0936724	0.112406	0.833337	0.404655	0.619531
BRF2	295.544	0.0695189	0.178688	0.389051	0.697239	0.834879
BRI3	1652.29	-1.06198	0.17071	-6.22097	4.94088e-10	7.09521e-08
BRI3BP	857.105	-0.155006	0.13598	-1.13992	0.254321	0.467675
BRICD5	73.2339	-0.0460999	0.371908	-0.123955	0.901351	0.953011
BRINP2	3.67473	-3.02211	2.71248	-1.11415	0.265214	NA
BRINP3	83.773	0.212142	0.383508	0.553163	0.580152	0.757323
BRIP1	1376.32	0.254327	0.140217	1.81381	0.0697065	0.202156
BRIX1	3537.47	0.345982	0.11454	3.02062	0.00252256	0.0188206
BRK1	1544.34	0.0346862	0.098336	0.352731	0.72429	0.851787
BRMS1	1745.61	0.125362	0.123256	1.01709	0.309112	0.525449
BRMS1L	488.182	0.441711	0.161407	2.73663	0.00620719	0.0366639
BROX	1985.58	0.051413	0.113295	0.453799	0.649974	0.806354
BRPF1	3523.55	-0.0567247	0.0673759	-0.841914	0.399836	0.61554
BRPF3	6631.27	-0.102654	0.0927867	-1.10634	0.268579	0.483602
BRSK1	251.134	-0.101413	0.239505	-0.423428	0.671983	0.820239
BRSK2	1528.93	-0.483599	0.120706	-4.00643	6.16445e-05	0.00113431
BRWD1	696.091	0.406894	0.1824	2.23078	0.0256957	0.101289
BRWD1-AS1	0.377499	-1.12395	6.66256	-0.168696	0.866036	NA
BRWD1-IT2	12.7985	-0.571108	0.745634	-0.765935	0.443715	NA
BRWD3	1058.68	0.34026	0.144266	2.35857	0.0183457	0.079989
BSCL2	876.377	-0.374565	0.383867	-0.975767	0.32918	0.546859
BSDC1	4024.99	-0.0576106	0.11387	-0.505933	0.612904	0.780944
BSG	14736.1	-0.333595	0.106689	-3.1268	0.00176718	0.0143746
BSN	959.788	-0.11646	0.144099	-0.808192	0.41898	0.63326
BSN-AS2	4.12908	0.385016	1.90117	0.202515	0.839514	NA
BSND	0.295091	3.84191	6.57552	0.584275	0.559035	NA
BSPRY	22.2318	0.452008	0.650562	0.694795	0.487183	NA
BST1	21.219	-1.04758	0.801046	-1.30776	0.190954	NA
BST2	1.48421	-1.49099	3.22064	-0.462948	0.643402	NA
BTAF1	3059.18	0.517743	0.110165	4.69972	2.60521e-06	9.74582e-05
BTBD1	5812.91	0.0642745	0.0947961	0.678029	0.497753	0.698571
BTBD10	1034.6	0.196564	0.127016	1.54755	0.12173	0.293025
BTBD11	366.615	-0.457571	0.210042	-2.17848	0.0293705	0.111338
BTBD16	1.52977	2.27211	3.77244	0.60229	0.546981	NA
BTBD17	2.33783	-1.14002	2.19704	-0.518886	0.60384	NA
BTBD18	0.676407	0.780366	4.82016	0.161897	0.871387	NA
BTBD19	4.35039	-4.02944	1.6367	-2.46193	0.0138192	NA
BTBD2	3708.59	-0.191926	0.100779	-1.90443	0.0568547	0.175438
BTBD3	1301.25	0.00579625	0.142684	0.040623	0.967596	0.98346
BTBD6	1765.66	0.0664146	0.121638	0.546	0.585066	0.761184
BTBD7	1124.64	-0.170593	0.137702	-1.23886	0.215398	0.420818
BTBD8	9.3839	-0.00420238	1.05909	-0.00396792	0.996834	NA
BTBD9	182.749	0.486359	0.241817	2.01127	0.0442968	0.147616
BTD	419.671	0.00717975	0.154181	0.0465669	0.962858	0.980829
BTF3	28631.6	0.156176	0.075183	2.07728	0.0377761	0.133085
BTF3L4	167.056	0.296673	0.234556	1.26483	0.205934	0.408594
BTG1	345.98	0.15588	0.188577	0.826615	0.408456	0.623491
BTG2	249.981	-0.0317421	0.269382	-0.117833	0.9062	0.95444
BTG3	784.476	-0.0874982	0.134852	-0.648844	0.516439	0.712092
BTG4	0.935218	0	6.66256	0	1	NA
BTK	7.07517	0.226275	1.36703	0.165524	0.868532	NA
BTN1A1	1.1835	0.0236742	2.98392	0.00793392	0.99367	NA
BTN2A1	688.568	0.27139	0.17987	1.50881	0.131347	0.307661
BTN2A2	380.439	0.249635	0.173663	1.43747	0.150586	0.334572
BTN3A1	121.855	0.143942	0.265154	0.542862	0.587225	0.762615
BTN3A2	71.9508	0.0994829	0.538407	0.184773	0.853407	0.92754
BTN3A3	29.2908	0.0847781	0.667622	0.126985	0.898952	NA
BTNL10	3.77912	-0.714199	2.13081	-0.335178	0.737491	NA
BTNL9	80.4188	-0.271447	0.353776	-0.767285	0.442912	0.653363
BTRC	2217.24	0.197834	0.0907761	2.17936	0.0293051	0.111185
BUB1	7199.69	0.169398	0.0749876	2.25902	0.0238821	0.0959092
BUB1B	4136.43	0.242278	0.100136	2.41949	0.0155421	0.0712548
BUB1B-PAK6	4.02275	0.955813	1.46788	0.65115	0.51495	NA
BUB3	7157.2	0.130729	0.0796946	1.64037	0.100928	0.258613
BUD13	1891.01	-0.240851	0.105816	-2.27612	0.0228389	0.092625
BUD31	1790.17	0.150001	0.167137	0.897474	0.369466	0.586918
BVES	131.591	0.794219	0.363467	2.18512	0.0288799	0.110103
BVES-AS1	14.4566	-0.126884	0.745671	-0.17016	0.864884	NA
BYSL	3303.09	0.0821213	0.102454	0.801545	0.422816	0.635836
BZRAP1-AS1	17.6783	-0.912727	0.738421	-1.23605	0.216439	NA
BZW1	1541.61	0.325226	0.161706	2.01123	0.0443016	0.147616
BZW2	4116.06	0.148558	0.0687389	2.16118	0.0306811	0.114562
C10orf10	34.0959	-0.326848	0.499561	-0.65427	0.512938	NA
C10orf105	0.650095	1.7266	6.63481	0.260233	0.794684	NA
C10orf107	7.35728	-0.381646	1.27464	-0.299414	0.764624	NA
C10orf11	10.813	0.0824214	1.09848	0.0750322	0.940189	NA
C10orf111	3.74002	0.619558	1.39599	0.443812	0.657179	NA
C10orf12	471.985	0.123557	0.157199	0.785993	0.431871	0.644573
C10orf131	5.98742	-1.83525	1.42988	-1.2835	0.199315	NA
C10orf2	1827.52	-0.0453861	0.10449	-0.43436	0.664027	0.815456
C10orf25	26.7615	-1.5554	0.577336	-2.6941	0.007058	NA
C10orf35	139.502	-0.477696	0.241456	-1.9784	0.0478836	0.15582
C10orf54	17.5087	-0.266725	0.868425	-0.307137	0.758739	NA
C10orf62	0.34179	1.42727	6.55963	0.217584	0.827753	NA
C10orf67	2.30225	5.13459	2.638	1.94639	0.0516076	NA
C10orf71	0.330074	0	6.66256	0	1	NA
C10orf76	1438.61	0.0381592	0.0988031	0.386215	0.699338	0.836169
C10orf82	60.4531	-0.243818	0.411169	-0.592988	0.553189	0.738267
C10orf88	431.442	0.136818	0.163177	0.838466	0.401769	0.617235
C10orf91	0.994013	-3.05595	4.44182	-0.687994	0.491456	NA
C10orf95	19.2191	-0.7078	0.731943	-0.967015	0.333537	NA
C10orf99	0.360789	3.00819	6.58948	0.456513	0.648021	NA
C11orf1	613.418	0.0327644	0.153902	0.212892	0.831411	0.917004
C11orf16	1.55556	3.4981	2.66296	1.31361	0.188977	NA
C11orf24	2600.58	-0.50111	0.140224	-3.57365	0.000352044	0.00437996
C11orf31	1504.22	-0.0913173	0.139048	-0.656735	0.511351	0.709359
C11orf42	0.820759	-0.893003	3.59307	-0.248535	0.803721	NA
C11orf45	87.9052	-0.0472119	0.370621	-0.127386	0.898635	0.951669
C11orf49	1165.23	-0.191675	0.10864	-1.76433	0.0776773	0.2178
C11orf52	1.04366	-2.59567	5.58749	-0.46455	0.642254	NA
C11orf54	230.981	0.474029	0.205949	2.30168	0.0213533	0.088618
C11orf57	2453.04	-0.0453059	0.12236	-0.370269	0.711182	0.843503
C11orf58	3981.69	0.320272	0.102593	3.12178	0.00179759	0.0145496
C11orf63	166.61	0.36102	0.276854	1.30401	0.19223	0.391884
C11orf65	35.7616	0.256907	0.75965	0.338191	0.735219	NA
C11orf68	353.6	-0.464286	0.182769	-2.54029	0.011076	0.0563077
C11orf70	38.6044	0.431739	0.466565	0.925356	0.354781	0.572225
C11orf71	64.2814	-0.0872803	0.466264	-0.18719	0.851511	0.926626
C11orf72	3.10991	-2.6924	1.73121	-1.55521	0.119896	NA
C11orf73	1237.56	0.221276	0.134239	1.64838	0.0992757	0.256332
C11orf74	984.994	0.0293028	0.130377	0.224754	0.822171	0.911816
C11orf80	293.929	-0.0722779	0.190153	-0.380103	0.703869	0.839225
C11orf84	5659.78	-0.388491	0.0894795	-4.34168	1.414e-05	0.00037788
C11orf91	0.458883	0.799439	5.48114	0.145853	0.884038	NA
C11orf94	6.11132	0.021168	1.20724	0.0175342	0.98601	NA
C11orf95	423.323	-0.176674	0.151757	-1.16419	0.244348	0.456941
C11orf96	19.7293	-0.577334	0.836077	-0.690528	0.489862	NA
C11orf98	3031.76	0.0124407	0.118723	0.104787	0.916545	0.95908
C12orf10	3576.46	-0.103993	0.0873741	-1.1902	0.233968	0.444586
C12orf29	1252.47	0.316779	0.165014	1.91971	0.0548945	0.171209
C12orf4	1167.08	0.0641243	0.124807	0.513786	0.607402	0.776923
C12orf43	2168.25	-0.0963723	0.109658	-0.878844	0.379486	0.596379
C12orf45	757.913	0.0446031	0.172508	0.258557	0.795977	0.89744
C12orf49	774.953	0.277789	0.122727	2.26347	0.0236068	0.0949036
C12orf50	1.70151	-1.76064	5.91625	-0.297594	0.766013	NA
C12orf56	1.47734	0.634371	3.84618	0.164935	0.868995	NA
C12orf57	1391.82	-0.238101	0.110777	-2.14936	0.0316056	0.116984
C12orf60	78.0398	-0.148748	0.405666	-0.366677	0.71386	0.845253
C12orf65	460.508	0.250609	0.179292	1.39777	0.162182	0.350646
C12orf66	273.576	0.212897	0.265141	0.802957	0.422	0.635635
C12orf71	0.60336	0	6.66256	0	1	NA
C12orf73	397.969	-0.439622	0.211709	-2.07654	0.0378443	0.133213
C12orf75	375.664	0.135512	0.172537	0.785407	0.432215	0.644893
C12orf76	5.23691	0.444054	1.23814	0.358645	0.71986	NA
C14orf1	1748.73	-0.442339	0.124503	-3.55284	0.0003811	0.00463955
C14orf119	955.8	-0.173314	0.121512	-1.42631	0.153779	0.338596
C14orf132	43.8858	-0.634718	0.467214	-1.35852	0.1743	0.367376
C14orf142	156.743	-0.189024	0.313559	-0.602835	0.546618	0.733173
C14orf159	188.436	-0.101752	0.286783	-0.354806	0.722735	0.851104
C14orf166	7110.59	0.372618	0.108253	3.4421	0.00057721	0.00628763
C14orf169	33.3413	-0.229816	0.62788	-0.366019	0.714351	NA
C14orf178	1.47737	-3.37659	2.65397	-1.27228	0.203275	NA
C14orf2	3256.21	-0.116746	0.145648	-0.801562	0.422806	0.635836
C14orf28	80.5345	0.54344	0.474395	1.14554	0.251984	0.465143
C14orf37	274.96	-0.170152	0.211241	-0.805488	0.420538	0.634567
C14orf39	1.05688	-0.143849	4.36449	-0.032959	0.973707	NA
C14orf79	198.711	0.177705	0.278507	0.638063	0.523433	0.717558
C14orf80	715.014	-0.189505	0.121397	-1.56103	0.118516	0.288567
C14orf93	323.67	0.00310581	0.208994	0.0148608	0.988143	0.993425
C15orf38-AP3S2	192.885	0.669896	0.270781	2.47394	0.0133633	0.063811
C15orf39	6087.45	-0.689945	0.113774	-6.06418	1.32628e-09	1.67099e-07
C15orf40	684.979	0.0542903	0.143967	0.377101	0.706098	0.840384
C15orf41	402.639	-0.171903	0.179143	-0.959584	0.337265	0.555043
C15orf48	6.48039	0.398676	1.46811	0.271557	0.785963	NA
C15orf52	5.09208	-0.766287	1.56455	-0.489782	0.624288	NA
C15orf57	310.79	-0.193441	0.19592	-0.987351	0.323471	0.540805
C15orf59	198.073	-0.315896	0.270102	-1.16954	0.242185	0.454341
C15orf59-AS1	1.7182	-1.30147	2.86815	-0.453765	0.649998	NA
C15orf61	673.789	-0.415466	0.148101	-2.80529	0.00502709	0.0316832
C15orf62	6.06614	-0.44585	1.34129	-0.332403	0.739585	NA
C15orf65	56.8403	-0.0462823	0.515793	-0.0897302	0.928502	0.964766
C16orf13	5246.35	-0.59037	0.100817	-5.85584	4.74611e-09	5.23838e-07
C16orf45	19.5604	0.351303	0.726282	0.483701	0.628598	NA
C16orf46	63.9479	0.0455416	0.342972	0.132785	0.894363	0.949536
C16orf52	100.251	-0.250631	0.345881	-0.724617	0.468687	0.673914
C16orf58	3200.44	-0.481285	0.153993	-3.12537	0.00177584	0.0144348
C16orf59	1420.59	-0.170922	0.111363	-1.53482	0.124828	0.297906
C16orf62	1782.05	0.140535	0.0979077	1.43538	0.151179	0.335382
C16orf70	1240.43	-0.0734905	0.137519	-0.534401	0.593064	0.767032
C16orf71	34.486	-0.2323	0.603993	-0.384607	0.700529	NA
C16orf72	1195.33	0.050336	0.123903	0.406254	0.684556	0.827085
C16orf74	16.6611	-1.22666	0.665542	-1.8431	0.0653142	NA
C16orf86	16.3569	-1.19397	0.987745	-1.20878	0.226746	NA
C16orf87	586.623	0.0597305	0.161055	0.370871	0.710734	0.84327
C16orf89	2.24838	0.132141	2.36019	0.0559874	0.955352	NA
C16orf91	598.223	0.0389265	0.147269	0.264322	0.791532	0.894929
C16orf95	279.652	-0.355	0.183834	-1.93109	0.0534718	0.167942
C16orf96	27.0472	0.294058	0.553663	0.531114	0.59534	NA
C17orf100	23.4047	-0.0283415	0.563496	-0.0502958	0.959887	NA
C17orf105	0.676184	0.712246	4.85703	0.146642	0.883414	NA
C17orf107	0.494216	0	6.66256	0	1	NA
C17orf47	0.727679	0	4.78371	0	1	NA
C17orf50	0.52304	0.422872	5.73526	0.073732	0.941224	NA
C17orf51	983.99	0.0647036	0.105116	0.615547	0.538193	0.727988
C17orf53	905.71	0.0819798	0.14011	0.58511	0.558474	0.742131
C17orf58	236.768	0.298002	0.195418	1.52495	0.127272	0.301635
C17orf62	1616.56	-0.0546448	0.0962146	-0.567947	0.570071	0.750332
C17orf64	0.385151	0	6.66256	0	1	NA
C17orf67	71.3767	0.247919	0.355557	0.69727	0.485634	0.688131
C17orf74	3.06266	-3.7552	2.15505	-1.74252	0.0814182	NA
C17orf75	662.365	0.360383	0.169399	2.12742	0.0333852	0.121919
C17orf80	2559.34	0.271381	0.0790592	3.43263	0.000597754	0.00646921
C17orf82	1.85033	-3.90461	3.07451	-1.26999	0.204087	NA
C17orf89	2311.69	-0.154851	0.128049	-1.20931	0.226543	0.435654
C17orf96	409.476	-0.381809	0.196185	-1.94617	0.0516349	0.164108
C17orf97	174.676	-0.843664	0.229263	-3.6799	0.000233325	0.00322573
C17orf98	0.959438	4.13166	4.41796	0.935196	0.349687	NA
C18orf21	2773.23	-0.0167652	0.102071	-0.164251	0.869534	0.935793
C18orf25	114.798	0.243759	0.323658	0.753138	0.451367	0.660025
C18orf32	205.122	0.64349	0.260874	2.46667	0.0136374	0.0647221
C18orf54	882.593	-0.0443167	0.149966	-0.295511	0.767604	0.879106
C18orf61	1.77775	0.586341	1.87526	0.312673	0.754529	NA
C18orf65	5.57773	-4.18286	1.97787	-2.11483	0.0344445	NA
C18orf8	1996.67	0.137703	0.0869528	1.58365	0.113273	0.280349
C19orf12	104.689	0.614866	0.301391	2.04009	0.0413411	0.14081
C19orf18	0.620959	0	6.66256	0	1	NA
C19orf24	1665.06	-0.54444	0.157317	-3.46079	0.000538593	0.00593965
C19orf25	302.695	-0.280889	0.213479	-1.31577	0.188252	0.386726
C19orf33	1.80313	-1.17649	2.11112	-0.557282	0.577335	NA
C19orf38	27.2951	0.181705	0.743902	0.24426	0.80703	NA
C19orf43	4473.22	0.0311173	0.117	0.265961	0.790269	0.894069
C19orf44	2701.03	-0.308471	0.112231	-2.74853	0.00598623	0.0357831
C19orf45	46.2909	0.356956	0.457533	0.780175	0.435288	0.647141
C19orf47	2167.52	-0.523444	0.122224	-4.28265	1.84677e-05	0.000467113
C19orf48	2416.03	-0.10807	0.103879	-1.04035	0.298178	0.515423
C19orf52	510.938	0.0770222	0.157589	0.488752	0.625017	0.789922
C19orf53	6676.02	-0.733034	0.122752	-5.97167	2.34842e-09	2.75115e-07
C19orf54	2395.02	-0.601758	0.130222	-4.621	3.81893e-06	0.000134719
C19orf57	223.338	-0.348701	0.221012	-1.57774	0.114625	0.28249
C19orf60	918.874	-0.340506	0.140863	-2.41728	0.0156371	0.0715428
C19orf66	8.5771	-0.766198	1.09828	-0.697637	0.485404	NA
C19orf67	0.539126	-2.0561	6.63457	-0.309907	0.756632	NA
C19orf68	202.024	-0.387014	0.233787	-1.65541	0.0978411	0.254067
C19orf70	2777.37	-0.246498	0.118674	-2.0771	0.0377921	0.133099
C19orf71	32.2224	-0.530685	0.466836	-1.13677	0.255635	NA
C19orf73	8.2011	-1.4944	1.19373	-1.25187	0.210617	NA
C19orf81	98.4937	-0.14012	0.315392	-0.444273	0.656845	0.811463
C19orf84	2.23661	-0.752029	2.36019	-0.318631	0.750007	NA
C1D	225.656	-0.625754	0.176187	-3.55165	0.000382829	0.00464931
C1GALT1	324.991	0.554906	0.215623	2.5735	0.0100674	0.0526258
C1GALT1C1	885.729	0.166539	0.113209	1.47108	0.141269	0.321788
C1GALT1C1L	45.9954	0.186467	0.460988	0.404494	0.685849	0.827567
C1orf100	1.2654	-1.73248	3.80472	-0.455349	0.648858	NA
C1orf101	16.8583	0.786187	0.946222	0.83087	0.406047	NA
C1orf106	74.9278	-0.75533	0.49037	-1.54033	0.12348	0.295799
C1orf109	772.197	0.369124	0.121903	3.02801	0.00246173	0.0185011
C1orf111	0.35466	-0.784877	6.39986	-0.12264	0.902392	NA
C1orf112	1512.67	-0.00217065	0.100769	-0.0215409	0.982814	0.990539
C1orf115	88.5999	0.202091	0.288435	0.700645	0.483524	0.686672
C1orf116	7.70798	0.0978707	1.16234	0.0842016	0.932896	NA
C1orf122	1899.32	-0.544423	0.13463	-4.04384	5.25822e-05	0.0010068
C1orf123	516.984	-0.0670081	0.141059	-0.475036	0.634762	0.796359
C1orf127	4.48173	0.645559	2.31542	0.278809	0.780391	NA
C1orf131	1508.73	0.0804198	0.189959	0.423353	0.672037	0.820239
C1orf132	4.33898	-0.0105812	2.28252	-0.00463574	0.996301	NA
C1orf140	1.4317	0	6.66256	0	1	NA
C1orf145	15.7718	-1.23455	1.07825	-1.14496	0.252226	NA
C1orf146	2.80756	-0.849323	6.49352	-0.130795	0.895937	NA
C1orf159	1495.8	-0.459314	0.120362	-3.81609	0.000135582	0.00207434
C1orf162	9.74802	-0.7256	1.03327	-0.702233	0.482534	NA
C1orf167	122.578	-0.063902	0.267478	-0.238906	0.811179	0.905642
C1orf168	0.92162	0	4.29741	0	1	NA
C1orf174	423.94	0.179362	0.185479	0.967017	0.333536	0.55123
C1orf189	4.33974	-0.586101	1.52049	-0.385467	0.699891	NA
C1orf194	0.351665	1.29589	6.61115	0.196015	0.844598	NA
C1orf198	592.024	-0.00713456	0.144032	-0.0495344	0.960493	0.980226
C1orf204	0.595773	2.25737	6.61115	0.341449	0.732765	NA
C1orf21	474.737	-0.0298813	0.186823	-0.159945	0.872925	0.937755
C1orf216	105.086	0.368843	0.272935	1.35139	0.17657	0.370817
C1orf220	26.3386	0.297153	0.58824	0.505156	0.613449	NA
C1orf226	137.885	-0.136729	0.273494	-0.499935	0.617121	0.784322
C1orf228	3.17204	4.17772	2.11764	1.97282	0.0485163	NA
C1orf229	3.75127	-1.76622	1.71724	-1.02852	0.303704	NA
C1orf233	155.266	-0.757074	0.331421	-2.28433	0.0223521	0.0914562
C1orf234	5.57965	-1.02801	1.41681	-0.725585	0.468093	NA
C1orf27	760.877	0.429255	0.140467	3.05592	0.00224372	0.017251
C1orf35	1487.22	-0.0515795	0.128868	-0.400251	0.688972	0.829387
C1orf43	7105.38	0.0433646	0.0779163	0.556554	0.577832	0.756103
C1orf50	556.292	-0.0120829	0.139754	-0.0864588	0.931102	0.966625
C1orf52	1976.78	-0.0639866	0.0884144	-0.723713	0.469242	0.674422
C1orf53	125.716	-0.533962	0.395109	-1.35143	0.176558	0.370817
C1orf54	17.1303	-0.460054	0.615336	-0.747648	0.454673	NA
C1orf56	445.033	-0.707188	0.160558	-4.40458	1.0599e-05	0.000297998
C1orf61	26.4374	0.0524479	0.570979	0.0918562	0.926812	NA
C1orf64	0.531844	0	6.66256	0	1	NA
C1orf74	214.006	0.191888	0.243487	0.788085	0.430647	0.643177
C1orf94	0.389415	0	6.66256	0	1	NA
C1QA	0.558312	2.67932	6.59762	0.406104	0.684666	NA
C1QB	1.20277	1.68647	6.63697	0.254103	0.799416	NA
C1QBP	22801.1	0.222805	0.0848923	2.62456	0.00867608	0.0470438
C1QC	0.585641	3.85603	6.57534	0.586438	0.557581	NA
C1QL1	123.464	-0.279541	0.300465	-0.930362	0.352184	0.569689
C1QL2	0.706577	-4.01608	5.72243	-0.701813	0.482796	NA
C1QL3	0.59194	0.248144	6.54223	0.0379296	0.969744	NA
C1QL4	34.0889	-1.2124	0.482395	-2.51329	0.0119612	NA
C1QTNF1	77.9435	-0.535965	0.456317	-1.17454	0.240177	0.452216
C1QTNF2	6.55886	-0.231209	1.49313	-0.154848	0.876941	NA
C1QTNF3	0.850698	2.71646	4.1915	0.648087	0.516929	NA
C1QTNF3-AMACR	431.82	-0.00108666	0.161765	-0.00671754	0.99464	0.996655
C1QTNF4	4.47367	1.32527	1.79402	0.738717	0.460079	NA
C1QTNF6	40.6539	0.293813	0.623059	0.471565	0.637238	0.79753
C1QTNF9	1.13668	0.184449	2.63454	0.0700116	0.944184	NA
C1QTNF9B	82.1912	-0.767953	0.411129	-1.86791	0.061774	0.185683
C1QTNF9B-AS1	11.4229	-0.70316	0.777577	-0.904297	0.365838	NA
C1R	122.656	0.0997312	0.288591	0.345579	0.729659	0.855539
C1RL	9.62245	-1.34064	1.15061	-1.16516	0.243955	NA
C1RL-AS1	2.22854	0.388425	2.17656	0.178458	0.858363	NA
C1S	12.5323	-0.0553606	1.14802	-0.0482226	0.961539	NA
C2	29.665	0.943701	0.619728	1.52277	0.127817	NA
C2-AS1	1.19783	0.0794165	2.77763	0.0285915	0.97719	NA
C20orf144	2.05423	-2.05157	2.06943	-0.991371	0.321504	NA
C20orf166-AS1	3.14997	0.697175	1.90863	0.365274	0.714907	NA
C20orf194	294.755	-0.052656	0.170864	-0.308174	0.75795	0.873287
C20orf196	67.6352	0.396155	0.358117	1.10621	0.268634	0.483635
C20orf24	3675.07	0.104929	0.0946942	1.10808	0.267827	0.482964
C20orf27	6701.32	-0.351418	0.103635	-3.39091	0.000696609	0.00728521
C20orf96	283.898	-0.297579	0.223411	-1.33198	0.182866	0.378515
C21orf140	3.37256	0.997929	1.74445	0.572059	0.567282	NA
C21orf2	520.374	-0.15223	0.137181	-1.1097	0.267128	0.482316
C21orf33	1513.67	0.13257	0.0895158	1.48097	0.138616	0.318179
C21orf58	377.583	-0.350607	0.213508	-1.64213	0.100564	0.258215
C21orf59	3666.28	0.0269672	0.110285	0.244523	0.806826	0.903155
C21orf62-AS1	12.6032	0.205543	0.852401	0.241134	0.809451	NA
C21orf91	407.095	0.346151	0.201867	1.71474	0.0863921	0.234188
C21orf91-OT1	13.9575	-0.071775	0.89825	-0.0799054	0.936313	NA
C22orf15	6.32543	0.300886	1.25913	0.238963	0.811134	NA
C22orf23	79.6435	-0.0876164	0.379829	-0.230673	0.817569	0.908977
C22orf24	26.8892	0.0438199	0.619308	0.0707563	0.943592	NA
C22orf29	511.416	-0.0533694	0.154506	-0.345419	0.729779	0.855606
C22orf34	0.520387	0	6.66256	0	1	NA
C22orf39	578.878	-0.72991	0.195446	-3.73458	0.000188026	0.00268895
C22orf46	355.605	-0.00731641	0.170094	-0.0430139	0.96569	0.982463
C2CD2L	1946.02	-0.167596	0.109538	-1.53003	0.126008	0.299758
C2CD3	2407.61	0.179298	0.0946126	1.89508	0.058082	0.177746
C2CD4A	12.1822	-0.148015	1.06283	-0.139266	0.88924	NA
C2CD4C	25.257	-1.44028	0.550795	-2.61492	0.00892488	NA
C2CD5	1469.89	0.289616	0.116224	2.49187	0.0127074	0.0617118
C2orf15	21.8837	0.276139	0.760489	0.363108	0.716525	NA
C2orf16	41.6193	0.620998	0.627586	0.989502	0.322418	0.539661
C2orf27A	10.9766	0.676399	0.857387	0.788907	0.430166	NA
C2orf27B	6.54294	0.207382	1.18053	0.175669	0.860554	NA
C2orf42	621.519	-0.137611	0.198704	-0.692546	0.488595	0.690715
C2orf47	931.087	0.0357379	0.139387	0.256393	0.797647	0.898194
C2orf48	25.0107	-0.183135	0.607485	-0.301464	0.76306	NA
C2orf49	454.85	-0.01884	0.193987	-0.0971202	0.922631	0.962335
C2orf50	1.8781	-1.12403	3.64671	-0.308232	0.757906	NA
C2orf61	0.487449	-1.12394	6.66256	-0.168695	0.866037	NA
C2orf66	4.04503	-0.718731	1.5031	-0.478168	0.632531	NA
C2orf68	411.224	-0.00559377	0.15776	-0.0354574	0.971715	0.98529
C2orf69	222.682	-0.0171479	0.271861	-0.063076	0.949706	0.97519
C2orf72	16.7302	0.746334	0.648901	1.15015	0.250082	NA
C2orf73	0.800117	0	5.17999	0	1	NA
C2orf74	217.788	0.488917	0.296779	1.64741	0.0994738	0.256647
C2orf76	394.205	-0.0206366	0.182923	-0.112816	0.910177	0.957043
C2orf78	2.42892	1.72656	6.63481	0.260227	0.794689	NA
C2orf81	155.301	0.0714136	0.205284	0.347877	0.727932	0.854265
C2orf82	22.2264	-0.426007	0.900472	-0.473093	0.636147	NA
C2orf88	3.81829	0.69913	1.78542	0.391578	0.69537	NA
C3	28.4873	0.642408	0.913825	0.702989	0.482063	NA
C3AR1	1.43314	-4.00604	3.75243	-1.06759	0.285707	NA
C3orf14	738.08	0.16198	0.169596	0.955092	0.339531	0.557261
C3orf18	34.5637	0.557771	0.505183	1.1041	0.26955	NA
C3orf20	4.77821	0.675344	1.77406	0.380677	0.703443	NA
C3orf22	0.676163	3.8747	5.74516	0.674429	0.500039	NA
C3orf33	103.269	0.0154973	0.339567	0.0456383	0.963599	0.981168
C3orf35	2.73247	0.390241	2.15485	0.181099	0.85629	NA
C3orf38	704.745	0.123093	0.16135	0.762892	0.445528	0.656011
C3orf49	0.898159	-1.09118	3.93804	-0.277087	0.781713	NA
C3orf52	151.615	0.299937	0.263398	1.13872	0.254818	0.468359
C3orf58	267.286	0.19181	0.220002	0.871857	0.383287	0.599882
C3orf62	66.7881	-0.0944952	0.355474	-0.265829	0.790371	0.894069
C3orf67	237.288	0.224366	0.229572	0.97732	0.328411	0.546412
C3orf70	17.3743	-0.567892	0.683145	-0.83129	0.40581	NA
C3orf80	13.1298	-0.80184	0.765874	-1.04696	0.295118	NA
C4A	46.4763	0.637601	0.413622	1.54151	0.123193	0.295324
C4B	25.6301	0.411667	0.555209	0.741463	0.458413	NA
C4orf19	6.78678	1.4357	1.12271	1.27877	0.200978	NA
C4orf22	2.8667	0.0698293	2.64253	0.0264252	0.978918	NA
C4orf26	0.858684	2.67972	4.8678	0.5505	0.581977	NA
C4orf3	391.501	-0.25711	0.172341	-1.49187	0.135734	0.313675
C4orf32	187.285	-0.188808	0.303099	-0.622925	0.533334	0.72488
C4orf33	223.406	0.44019	0.269346	1.63429	0.102197	0.260915
C4orf36	6.22413	2.52455	1.3239	1.90691	0.0565324	NA
C4orf46	1172.1	0.0479696	0.112996	0.424527	0.671182	0.819708
C4orf47	9.66923	-0.201274	1.13668	-0.177071	0.859452	NA
C4orf48	1565.55	-0.616796	0.158306	-3.89622	9.77065e-05	0.00163109
C4orf50	1.38197	3.68645	4.11607	0.895625	0.370453	NA
C5	44.194	0.109889	0.591779	0.185693	0.852686	0.927223
C5AR1	10.8945	0.133487	1.02883	0.129747	0.896766	NA
C5orf15	4500.89	-0.320532	0.115618	-2.77233	0.00556565	0.0339869
C5orf22	2186.73	0.0554782	0.0892649	0.621501	0.53427	0.725417
C5orf24	602.944	0.141689	0.131834	1.07475	0.282485	0.499151
C5orf30	127.788	0.146949	0.268082	0.548148	0.58359	0.759709
C5orf34	638.478	0.223395	0.16461	1.35712	0.174744	0.367978
C5orf42	1569.13	0.199777	0.135199	1.47765	0.139502	0.319195
C5orf45	513.915	-0.0787904	0.166071	-0.47444	0.635187	0.796524
C5orf49	2.60152	-0.149069	2.02593	-0.0735802	0.941344	NA
C5orf51	1699.27	-0.0723212	0.122947	-0.588232	0.556377	0.740573
C5orf56	9.16255	-0.535462	1.02271	-0.523573	0.600576	NA
C5orf60	3.19248	-0.771109	1.73097	-0.445478	0.655974	NA
C5orf63	182.645	-0.0464031	0.240462	-0.192974	0.846979	0.923953
C5orf64	0.353986	2.35106	6.58343	0.357117	0.721004	NA
C5orf66	841.803	0.192874	0.141951	1.35873	0.174232	0.367366
C5orf66-AS1	0.58121	0	6.66256	0	1	NA
C6orf1	594.764	-0.669918	0.158325	-4.23127	2.32373e-05	0.000558155
C6orf106	1175.13	0.314745	0.120423	2.61365	0.00895803	0.0481814
C6orf118	7.52763	-0.739453	1.52237	-0.485725	0.627162	NA
C6orf120	518.23	-0.0282853	0.13552	-0.208717	0.834669	0.919037
C6orf132	4.00292	-1.15683	1.8617	-0.621383	0.534348	NA
C6orf136	1422.52	-0.792214	0.158058	-5.01218	5.38179e-07	2.59472e-05
C6orf141	5.34813	-0.320618	1.1044	-0.290309	0.77158	NA
C6orf163	7.86995	0.942593	1.30214	0.723882	0.469138	NA
C6orf201	155.594	0.476135	0.26379	1.80497	0.0710786	0.204713
C6orf203	298.803	0.318897	0.20991	1.5192	0.128711	0.30386
C6orf222	0.30536	3.71404	6.57717	0.564687	0.572287	NA
C6orf223	1.08651	-1.12396	2.92212	-0.384638	0.700505	NA
C6orf226	67.3161	-0.588417	0.435286	-1.35179	0.176442	0.370791
C6orf229	0.571584	-0.8795	5.49761	-0.159979	0.872898	NA
C6orf25	0.433718	-1.09437	6.63457	-0.16495	0.868983	NA
C6orf47	310.517	0.0979586	0.199293	0.49153	0.623051	0.788236
C6orf48	207.009	0.171363	0.301918	0.567581	0.570319	0.750332
C6orf52	61.9887	0.0198543	0.514809	0.0385663	0.969236	0.984047
C6orf58	0.486197	0	6.66256	0	1	NA
C6orf62	1307.55	0.220776	0.129296	1.70751	0.0877265	0.236687
C6orf89	1659.75	0.370792	0.105033	3.53023	0.000415197	0.00492885
C6orf99	8.66915	-1.02653	1.15068	-0.892106	0.372336	NA
C7orf13	57.4409	-0.363535	0.441604	-0.823215	0.410386	0.624938
C7orf25	344.856	0.103121	0.18015	0.572419	0.567038	0.748373
C7orf26	1546.34	-0.328818	0.106014	-3.10165	0.00192448	0.0153167
C7orf31	616.448	-0.054843	0.130298	-0.420904	0.673825	0.821521
C7orf43	806.884	-0.601166	0.213896	-2.81055	0.00494572	0.0313871
C7orf49	665.415	0.310368	0.143835	2.1578	0.0309433	0.115271
C7orf50	4526.01	-0.198977	0.0829301	-2.39933	0.016425	0.074207
C7orf55	788.307	-0.0701287	0.16348	-0.428973	0.667943	0.817858
C7orf55-LUC7L2	385.184	-0.0928425	0.224635	-0.413304	0.679384	0.824234
C7orf57	22.6959	0.784589	0.901232	0.870574	0.383987	NA
C7orf61	5.07312	-0.381195	1.40065	-0.272157	0.785502	NA
C7orf73	1127.73	-0.116383	0.1528	-0.761666	0.446259	0.656726
C8G	9.30403	0.513333	0.966543	0.531102	0.595348	NA
C8orf31	67.3923	-0.69233	0.344481	-2.00978	0.0444549	0.147953
C8orf33	6835.93	-0.311348	0.116382	-2.67522	0.00746806	0.042261
C8orf34	61.9259	-0.606452	0.654243	-0.926952	0.353951	0.571448
C8orf34-AS1	16.9974	0.670146	0.90484	0.740624	0.458922	NA
C8orf37	30.9278	0.0832468	0.751772	0.110734	0.911827	NA
C8orf37-AS1	2.56496	-0.58884	2.04241	-0.288306	0.773112	NA
C8orf4	0.998857	3.67934	4.72683	0.778395	0.436336	NA
C8orf44	30.3537	-0.750652	0.533016	-1.40831	0.159039	NA
[truncated: 21,293 more rows]

## Sheet: Geneset Profiling
ATF6					IRE1/XBP1s					PERK					HSR					OSR
	AA263	AA263yne	AA263-5			AA263	AA263yne	AA263-5			AA263	AA263yne	AA263-5			AA263	AA263yne	AA263-5			AA263	AA263yne	AA263-5
CALR	0.477743	0.727307	0.684647		DERL2	0.38873	0.601014	0.502399		ASNS	0.831856	0.594437	0.384589		BAG3	0.241066	0.391063	0.17498		GCLM	1.12619	1.12844	1.07285
CRELD2	0.311073	0.622923	0.509568		DNAJB9	1.13726	1.57585	1.46219		ATF3	0.420106	0.383333	-0.102928		CRYAB	-0.64865	-2.40307	1.2253		HMOX1	1.89969	1.86318	1.52387
DNAJB11	0.78582	1.07553	1.16199		DNAJC10	0.342482	0.370576	0.463868		ATF4	0.377074	0.147889	0.150329		DNAJB1	0.412189	0.585836	0.540607		PRDX1	0.199182	0.259357	0.228565
HERPUD1	1.46806	1.97718	1.75619		EDEM2	0.193285	0.296211	0.287369		ATF6	0.319467	0.255918	0.224146		DNAJB4	0.665622	0.644145	0.779388		SOD1	0.177805	0.163205	0.266244
HSPA5	1.70713	2.29585	2.17814		HSPA13	0.575993	0.789568	0.603297		CARS	0.524983	0.265047	0.33271		GADD45B	-1.13123	-0.151342	-1.01593		SQSTM1	0.198181	0.135161	-0.009694
HYOU1	0.811408	1.15398	1.08774		LMAN1	0.277572	0.432986	0.391244		CEBPB	0.465763	0.302488	-0.334135		HBA2	-0.184063	-0.489283	-0.894379		TXNRD1	0.682669	0.787742	0.843416
MANF	0.999676	1.41939	1.44147		OSTC	0.433501	0.389777	0.360659		DDIT3	1.21274	1.14521	0.930706		HSP90AA1	0.198044	0.261521	0.29851		GCLC	0.669541	0.658176	0.76215
MIS12	0.680584	0.743547	0.850191		PDIA5	0.431022	0.483889	0.463281		DDIT4	0.399002	-0.0820089	-0.302706		HSPA1A	0.866695	1.19461	0.926464		NQO1	0.0751775	-0.0340441	0.389065
PDIA4	1.17705	1.48851	1.54155		SEC23B	0.348751	0.434455	0.453691		GADD45A	0.478925	0.439482	0.177302		HSPA1B	0.869022	1.20792	0.982509		ME1	0.0148886	0.189925	0.199909
PDIA6	0.678607	0.896841	1.00677		SEC61A1	0.448089	0.50667	0.325481		PPP1R15A	-0.0349487	0.188271	-0.223199		HSPA4L	0.135564	0.272611	0.168305		TXN	0.0253561	-0.0283928	0.00333973
SEL1L	0.922143	1.34911	1.36088		SRP19	0.212434	0.369265	0.248921		SARS	0.399731	0.26906	0.235584		HSPB1	-0.561516	-0.895511	-0.878457
SELK	0.37423	0.748196	0.399688		SRPRB	0.545964	0.61233	0.584594		SLC1A4	1.52768	1.16465	1.11034		HSPH1	0.334124	0.565705	0.414861
SLC39A14	0.443694	0.733012	0.556736		SSR1	0.497888	0.601922	0.609879		TRIB3	0.313365	-0.0867729	-0.228291		IER5	-0.245146	-0.148278	-0.299507
SLFN11	3.03596	3.78086	2.5287		SSR3	0.556341	0.663601	0.756009		WARS	0.292862	0.121432	0.285754		RGS2	0.279156	0.321578	0.437444
TMEM50B	0.367827	0.639138	0.633544		STT3A	0.372004	0.346201	0.352175		YARS	0.301317	0.244105	0.157671		SERPINH1	0.0906399	0.329253	0.0391885
UGDH	0.642418	1.14589	1.08382		UFM1	0.310507	0.447284	0.386064		ABCF2	0.225026	0.210484	0.252603		MRPL18	0.132275	0.173961	0.193774
HSD17B7	0.0799176	0.620765	0.605844		FICD	1.00478	1.20009	1.5155		MTHFR	-0.111918	0.410864	-0.0404816		CLU	0.163827	-0.0409171	-0.20491
STARD4	0.239329	0.531111	0.554204		MBNL2	0.597656	0.306713	0.354908		PON2	0.151326	0.100883	0.32946
										LMO4	0.0227709	0.0467101	-0.180747
										CBX4	-0.501206	-0.340081	-0.623409
